# Supplementary material for: Vaccination rescues dysfunctional T cell therapy by amplifying rare stem-like antitumor CD8+ T cells
Source: Research Square preprint supplement (doi:10.21203/rs.3.rs-8941883/v1), 2026-03-13
Supplement: Supplementary file 1 [file 2f2a3d17e45628fe0f02b5ba.xlsx]

## Sheet: Pmel_CD39lo_vs_DP_RNAClustmarke
gene	p_val	avg_log2FC	pct.1	pct.2	p_val_adj	Infusion
Tcf7	0	3.65382	0.268	0.028	0	CD39lo
Gm26740	2.11e-273	2.36075	0.252	0.067	6.8e-269	CD39lo
Aff3	0	2.27954	0.437	0.142	0	CD39lo
Ikzf2	1.09e-207	1.76977	0.351	0.16	3.51e-203	CD39lo
Mgst2	4.78e-189	1.55365	0.388	0.203	1.54e-184	CD39lo
Gprin3	4.52e-214	1.51449	0.469	0.268	1.46e-209	CD39lo
Sh3bp5	5.52e-199	1.51309	0.329	0.144	1.78e-194	CD39lo
Asap1	1.35e-199	1.50994	0.375	0.184	4.36e-195	CD39lo
Ctla4	1.11e-197	1.28274	0.464	0.266	3.59e-193	CD39lo
Lef1	1.67e-181	1.2758	0.586	0.416	5.39e-177	CD39lo
Etv6	1.86e-126	1.24117	0.467	0.321	6e-122	CD39lo
Tcrg-C4	1.93e-77	1.23984	0.253	0.147	6.23e-73	CD39lo
Ust	3.21e-111	1.22667	0.299	0.164	1.04e-106	CD39lo
Ctss	3.05e-156	1.20734	0.352	0.182	9.83e-152	CD39lo
Il7r	5.83e-183	1.19194	0.55	0.37	1.88e-178	CD39lo
Gm16158	2.1e-104	1.18798	0.252	0.128	6.76e-100	CD39lo
Gm8369	2.03e-250	1.17749	0.573	0.348	6.56e-246	CD39lo
Rnf19b	3.84e-177	1.17707	0.521	0.338	1.24e-172	CD39lo
Maml3	3.45e-89	1.175	0.521	0.414	1.11e-84	CD39lo
Scml4	4.64e-142	1.16673	0.377	0.214	1.5e-137	CD39lo
Pecam1	2.52e-136	1.16251	0.359	0.198	8.13e-132	CD39lo
Pde4b	1.18e-93	1.16048	0.281	0.159	3.8e-89	CD39lo
Cd27	5.98e-124	1.13615	0.306	0.16	1.93e-119	CD39lo
Ltb	0	1.12937	0.796	0.568	0	CD39lo
Dgka	2.2e-183	1.11571	0.472	0.278	7.1e-179	CD39lo
Kdm5b	3.55e-103	1.10459	0.272	0.143	1.15e-98	CD39lo
Cdyl2	3.47e-119	1.05914	0.366	0.215	1.12e-114	CD39lo
Abtb2	9.77e-71	1.0532	0.319	0.212	3.15e-66	CD39lo
Peli1	6.23e-254	1.04821	0.702	0.509	2.01e-249	CD39lo
Ahcyl2	3.57e-84	1.03684	0.319	0.199	1.15e-79	CD39lo
Ifi203	2.31e-161	1.03298	0.454	0.271	7.45e-157	CD39lo
Bach2	1.55e-174	1.02121	0.63	0.452	5e-170	CD39lo
Sgms1	2.05e-54	1.0181	0.256	0.167	6.6e-50	CD39lo
Phc3	2.06e-121	1.00423	0.469	0.316	6.66e-117	CD39lo
Ttc3	8.82e-93	1.00065	0.317	0.189	2.85e-88	CD39lo
BE692007	5.71e-96	1.00017	0.297	0.169	1.84e-91	CD39lo
Kdm2b	3.87e-97	0.999455	0.347	0.215	1.25e-92	CD39lo
Sntb1	2.18e-72	0.996639	0.29	0.18	7.05e-68	CD39lo
Nfkbia	2.35e-126	0.98649	0.502	0.344	7.58e-122	CD39lo
St8sia1	2.52e-114	0.979999	0.353	0.204	8.13e-110	CD39lo
Emb	5.67e-236	0.978593	0.751	0.58	1.83e-231	CD39lo
Hmgn1	8.56e-56	0.974034	0.301	0.207	2.77e-51	CD39lo
Cyth1	9.93e-112	0.966301	0.439	0.293	3.21e-107	CD39lo
Lrrc8d	5.46e-68	0.95515	0.262	0.159	1.76e-63	CD39lo
Itpr1	6.8e-52	0.939542	0.347	0.254	2.2e-47	CD39lo
Vps54	6.19e-129	0.931146	0.488	0.326	2e-124	CD39lo
Foxp1	1.2e-237	0.925208	0.859	0.747	3.88e-233	CD39lo
Ctsz	1.08e-48	0.924067	0.255	0.17	3.47e-44	CD39lo
Camk2d	3.12e-94	0.923101	0.386	0.251	1.01e-89	CD39lo
Chd3	8.12e-102	0.916991	0.373	0.232	2.62e-97	CD39lo
Mbp	1.62e-91	0.914666	0.367	0.236	5.22e-87	CD39lo
Hivep2	1.56e-93	0.911184	0.421	0.289	5.04e-89	CD39lo
Limd2	1.63e-208	0.899826	0.68	0.494	5.25e-204	CD39lo
Ikzf3	1.22e-98	0.896513	0.407	0.266	3.93e-94	CD39lo
Fam241a	1.37e-60	0.894956	0.25	0.154	4.43e-56	CD39lo
Fam189b	1.59e-92	0.881888	0.343	0.211	5.13e-88	CD39lo
Fbxl20	3.35e-62	0.881743	0.261	0.162	1.08e-57	CD39lo
Cd226	4.8e-161	0.880656	0.629	0.462	1.55e-156	CD39lo
Slfn1	4.19e-98	0.879673	0.381	0.242	1.35e-93	CD39lo
Ipcef1	1.26e-124	0.875836	0.505	0.346	4.07e-120	CD39lo
AY036118	1.6e-73	0.863118	0.333	0.217	5.16e-69	CD39lo
Nxpe3	7.32e-75	0.861886	0.36	0.243	2.36e-70	CD39lo
Ogt	2.3e-194	0.860663	0.677	0.502	7.41e-190	CD39lo
Kbtbd11	2.44e-59	0.859931	0.274	0.176	7.88e-55	CD39lo
Samhd1	9.72e-168	0.859208	0.664	0.493	3.14e-163	CD39lo
Dpp4	1.11e-112	0.849733	0.512	0.363	3.57e-108	CD39lo
Fam169b	2.8e-167	0.845725	0.704	0.546	9.04e-163	CD39lo
Maml2	8.78e-177	0.84362	0.775	0.639	2.83e-172	CD39lo
Tasp1	3.45e-54	0.837598	0.258	0.166	1.11e-49	CD39lo
Jun	1.14e-74	0.836696	0.443	0.327	3.67e-70	CD39lo
Lncpint	4.11e-116	0.830799	0.587	0.441	1.33e-111	CD39lo
Grap	6.53e-97	0.824051	0.468	0.332	2.11e-92	CD39lo
Satb1	1.04e-163	0.819645	0.755	0.621	3.37e-159	CD39lo
Inpp4b	1.78e-184	0.817074	0.945	0.906	5.74e-180	CD39lo
Mxd4	3e-60	0.816456	0.278	0.176	9.67e-56	CD39lo
Ets1	1.24e-143	0.810331	0.63	0.474	4.01e-139	CD39lo
Trbv14	1.01e-72	0.799027	0.357	0.239	3.26e-68	CD39lo
Clint1	1.06e-129	0.798464	0.608	0.461	3.41e-125	CD39lo
Gm12216	3.75e-66	0.798214	0.331	0.221	1.21e-61	CD39lo
Gm2a	7.71e-82	0.793214	0.452	0.328	2.49e-77	CD39lo
Ripor2	5.34e-91	0.792074	0.508	0.378	1.72e-86	CD39lo
Adk	5.29e-31	0.789112	0.284	0.219	1.71e-26	CD39lo
Ssh2	2.64e-99	0.788135	0.548	0.414	8.52e-95	CD39lo
Akap13	4.59e-168	0.784147	0.884	0.82	1.48e-163	CD39lo
Pde3b	1.52e-181	0.784049	0.835	0.725	4.91e-177	CD39lo
Gm2682	3.99e-57	0.782556	0.434	0.331	1.29e-52	CD39lo
Tank	8.5e-65	0.7802	0.374	0.266	2.74e-60	CD39lo
Thada	5.02e-85	0.780023	0.457	0.326	1.62e-80	CD39lo
Prkca	5.84e-119	0.777703	0.671	0.548	1.89e-114	CD39lo
Focad	9.52e-37	0.775905	0.258	0.183	3.07e-32	CD39lo
Cytip	4.67e-95	0.773556	0.611	0.492	1.51e-90	CD39lo
Crim1	1.65e-35	0.769774	0.355	0.281	5.33e-31	CD39lo
Thap3	9.63e-56	0.764609	0.26	0.165	3.11e-51	CD39lo
Rabgap1l	2.71e-125	0.762587	0.763	0.665	8.74e-121	CD39lo
Il27ra	5.33e-51	0.761621	0.262	0.172	1.72e-46	CD39lo
Cd2ap	4.1e-40	0.760581	0.258	0.18	1.32e-35	CD39lo
Prkcb	6.63e-46	0.760528	0.272	0.187	2.14e-41	CD39lo
Pdcd4	2.44e-153	0.758363	0.683	0.528	7.89e-149	CD39lo
Crebrf	1.03e-93	0.757278	0.448	0.307	3.34e-89	CD39lo
Zfp36l1	7.3e-52	0.75665	0.277	0.185	2.36e-47	CD39lo
Cmss1	2.3e-99	0.75296	0.63	0.512	7.41e-95	CD39lo
Syne1	7.81e-49	0.75131	0.269	0.179	2.52e-44	CD39lo
Camk1d	2.29e-74	0.749539	0.49	0.374	7.38e-70	CD39lo
Gm44174	1.07e-46	0.747294	0.295	0.206	3.47e-42	CD39lo
Snhg12	1.02e-45	0.742614	0.294	0.206	3.31e-41	CD39lo
Rnf19a	9.62e-51	0.740599	0.31	0.216	3.11e-46	CD39lo
Stat4	3.18e-118	0.740329	0.65	0.518	1.03e-113	CD39lo
Prdx4	2.69e-26	0.738517	0.266	0.207	8.67e-22	CD39lo
Vps37b	1.7e-87	0.738407	0.565	0.449	5.49e-83	CD39lo
Ptpn1	2.54e-57	0.738098	0.582	0.501	8.21e-53	CD39lo
Cd69	1.25e-89	0.735166	0.524	0.396	4.03e-85	CD39lo
Utrn	3.81e-157	0.732396	0.759	0.636	1.23e-152	CD39lo
Ypel3	1.78e-81	0.728672	0.416	0.286	5.75e-77	CD39lo
Bcas3	2.04e-71	0.727678	0.441	0.325	6.58e-67	CD39lo
Cd274	2.34e-45	0.726603	0.355	0.264	7.56e-41	CD39lo
Gm42418	2.13e-188	0.726108	0.964	0.934	6.89e-184	CD39lo
Dtd1	1.69e-39	0.725214	0.291	0.212	5.45e-35	CD39lo
4933406I18Rik	3.39e-83	0.723155	0.566	0.449	1.09e-78	CD39lo
Gtf2i	7.22e-59	0.719183	0.369	0.264	2.33e-54	CD39lo
Gpr18	3.07e-45	0.718467	0.262	0.177	9.9e-41	CD39lo
Cdk17	2.75e-99	0.713935	0.585	0.453	8.87e-95	CD39lo
Stat5b	2.75e-71	0.71185	0.452	0.337	8.89e-67	CD39lo
Atic	2.24e-26	0.711027	0.309	0.249	7.23e-22	CD39lo
Cdkn1b	8.84e-69	0.710353	0.381	0.263	2.86e-64	CD39lo
Paxbp1	3.85e-39	0.709608	0.258	0.179	1.24e-34	CD39lo
Msi2	2.32e-83	0.708167	0.574	0.459	7.49e-79	CD39lo
Rhoh	7.69e-137	0.706769	0.715	0.579	2.48e-132	CD39lo
Cyb5a	6.09e-63	0.705159	0.569	0.48	1.96e-58	CD39lo
Uvrag	8.98e-63	0.703967	0.468	0.361	2.9e-58	CD39lo
Btg1	8.82e-140	0.698307	0.689	0.537	2.85e-135	CD39lo
Ssbp2	4.44e-117	0.695256	0.733	0.621	1.43e-112	CD39lo
Tnik	1.26e-70	0.692467	0.488	0.373	4.06e-66	CD39lo
Bcl11b	4.29e-87	0.691748	0.633	0.523	1.39e-82	CD39lo
Arhgap25	1.55e-43	0.689417	0.27	0.185	5e-39	CD39lo
Setd7	1.03e-53	0.68783	0.376	0.276	3.31e-49	CD39lo
Jmjd1c	3.97e-71	0.687027	0.57	0.466	1.28e-66	CD39lo
Tmem131l	9.04e-41	0.684996	0.278	0.195	2.92e-36	CD39lo
Zbtb20	3.34e-111	0.684593	0.731	0.635	1.08e-106	CD39lo
Themis	3.34e-124	0.684255	0.962	0.946	1.08e-119	CD39lo
Pfkfb3	5.44e-43	0.683962	0.316	0.231	1.76e-38	CD39lo
Rere	1.44e-46	0.683313	0.343	0.251	4.64e-42	CD39lo
Usp32	4.63e-51	0.677715	0.335	0.237	1.5e-46	CD39lo
Il2ra	1.37e-16	0.676532	0.603	0.581	4.42e-12	CD39lo
Man1a	6.36e-62	0.676448	0.541	0.441	2.05e-57	CD39lo
Cux1	4.14e-27	0.675559	0.372	0.311	1.34e-22	CD39lo
Abhd18	1.85e-43	0.672134	0.337	0.25	5.97e-39	CD39lo
Ncoa1	4.55e-38	0.670867	0.357	0.278	1.47e-33	CD39lo
Arhgap15	1.69e-185	0.670397	0.94	0.902	5.46e-181	CD39lo
Traf3	7.42e-51	0.67003	0.41	0.314	2.4e-46	CD39lo
Tcf12	1.07e-90	0.668297	0.739	0.657	3.45e-86	CD39lo
Stim2	3.88e-43	0.664574	0.331	0.243	1.25e-38	CD39lo
Aff4	2.02e-53	0.663024	0.378	0.277	6.51e-49	CD39lo
Itpr2	1.4e-52	0.662263	0.364	0.262	4.51e-48	CD39lo
Rfx3	1.18e-44	0.66222	0.384	0.294	3.8e-40	CD39lo
Tut4	1.05e-96	0.659293	0.624	0.5	3.4e-92	CD39lo
Gpbp1l1	3.13e-49	0.658543	0.331	0.235	1.01e-44	CD39lo
Tnrc6b	9.82e-127	0.657563	0.758	0.644	3.17e-122	CD39lo
Foxo3	4.72e-37	0.657015	0.251	0.174	1.52e-32	CD39lo
Mllt3	4.02e-65	0.654681	0.633	0.548	1.3e-60	CD39lo
Ubxn7	4.67e-37	0.654604	0.262	0.185	1.51e-32	CD39lo
Bzw2	5.68e-25	0.654289	0.439	0.391	1.83e-20	CD39lo
Map3k8	5.85e-30	0.654169	0.278	0.21	1.89e-25	CD39lo
Osbpl8	8.05e-50	0.65338	0.493	0.406	2.6e-45	CD39lo
Map3k3	1.61e-50	0.652916	0.389	0.291	5.2e-46	CD39lo
Clybl	8.64e-36	0.652379	0.349	0.271	2.79e-31	CD39lo
Hif1a	2.09e-45	0.651589	0.608	0.545	6.76e-41	CD39lo
Snhg1	2.16e-43	0.649291	0.418	0.329	6.98e-39	CD39lo
Adgre5	7.81e-37	0.646985	0.327	0.247	2.52e-32	CD39lo
Atp8a1	1.19e-36	0.646562	0.266	0.189	3.84e-32	CD39lo
Aff1	1.02e-27	0.640665	0.258	0.193	3.29e-23	CD39lo
Zfas1	2.87e-38	0.639993	0.431	0.352	9.28e-34	CD39lo
Xrcc4	1.99e-38	0.639453	0.331	0.249	6.44e-34	CD39lo
Orc4	4.81e-35	0.638621	0.283	0.209	1.55e-30	CD39lo
Phf21a	1.88e-75	0.638315	0.602	0.496	6.05e-71	CD39lo
Kmt5b	7.75e-35	0.637309	0.278	0.202	2.5e-30	CD39lo
Snhg3	1.53e-22	0.63699	0.334	0.277	4.95e-18	CD39lo
Ifnar2	7.49e-53	0.633384	0.387	0.284	2.42e-48	CD39lo
Bcl2	8.73e-112	0.633256	0.93	0.922	2.82e-107	CD39lo
Itpkb	1.69e-46	0.633155	0.401	0.307	5.47e-42	CD39lo
Icos	1.49e-12	0.631086	0.336	0.303	4.8e-08	CD39lo
Nlk	1.14e-35	0.62639	0.335	0.256	3.67e-31	CD39lo
Herc4	9.41e-50	0.626134	0.429	0.332	3.04e-45	CD39lo
Nisch	1.23e-43	0.626134	0.356	0.267	3.99e-39	CD39lo
Tspan13	1.44e-39	0.624748	0.436	0.356	4.65e-35	CD39lo
Med13l	1.38e-25	0.624736	0.381	0.321	4.44e-21	CD39lo
Prkch	4.73e-114	0.622975	0.844	0.77	1.53e-109	CD39lo
Cabin1	1.6e-39	0.622705	0.356	0.273	5.16e-35	CD39lo
Fars2	3.44e-53	0.622514	0.483	0.386	1.11e-48	CD39lo
Camk4	2.16e-65	0.622429	0.814	0.77	6.99e-61	CD39lo
Idnk	1.79e-50	0.620505	0.38	0.281	5.79e-46	CD39lo
Rmnd5a	1.66e-37	0.619592	0.327	0.246	5.36e-33	CD39lo
Cdk8	9.68e-44	0.619519	0.421	0.334	3.12e-39	CD39lo
Elk4	2.73e-38	0.61931	0.276	0.195	8.82e-34	CD39lo
Bicdl1	2.76e-33	0.618145	0.315	0.24	8.92e-29	CD39lo
Ip6k1	9.58e-36	0.617269	0.29	0.212	3.09e-31	CD39lo
Nrip1	3.67e-33	0.617148	0.335	0.26	1.18e-28	CD39lo
Kcnq1ot1	6.34e-37	0.616057	0.445	0.368	2.05e-32	CD39lo
Pim2	4.8e-47	0.615239	0.423	0.331	1.55e-42	CD39lo
Ddx6	2.02e-62	0.614965	0.59	0.494	6.54e-58	CD39lo
Zfp398	2.41e-30	0.61424	0.276	0.206	7.78e-26	CD39lo
Prelid2	8.94e-58	0.614212	0.619	0.54	2.89e-53	CD39lo
Rexo2	9.97e-12	0.614155	0.534	0.543	3.22e-07	CD39lo
Sla	4.93e-32	0.612696	0.262	0.191	1.59e-27	CD39lo
Arhgef3	4.51e-43	0.612407	0.343	0.253	1.46e-38	CD39lo
Xbp1	7.92e-14	0.610927	0.293	0.255	2.56e-09	CD39lo
Stk39	8.79e-87	0.610889	0.794	0.725	2.84e-82	CD39lo
Ak2	1.05e-21	0.610576	0.425	0.379	3.4e-17	CD39lo
Ccnd3	1.57e-123	0.608564	0.807	0.722	5.08e-119	CD39lo
Mndal	2.58e-82	0.608386	0.609	0.493	8.33e-78	CD39lo
Fam3c	1.41e-26	0.60824	0.256	0.193	4.56e-22	CD39lo
Bmt2	3.88e-47	0.608155	0.405	0.311	1.25e-42	CD39lo
Ctps2	6.66e-32	0.607276	0.269	0.197	2.15e-27	CD39lo
Hpcal1	2.35e-42	0.607248	0.351	0.262	7.58e-38	CD39lo
Fam78a	6.52e-33	0.607189	0.266	0.193	2.1e-28	CD39lo
Lyst	1.49e-36	0.607103	0.471	0.395	4.8e-32	CD39lo
Top2b	6.21e-56	0.606251	0.538	0.444	2e-51	CD39lo
Cd82	3.29e-23	0.606247	0.302	0.242	1.06e-18	CD39lo
Reep3	5.36e-27	0.605858	0.264	0.2	1.73e-22	CD39lo
Gpr132	2.43e-43	0.605805	0.349	0.258	7.83e-39	CD39lo
Rabgap1	9.38e-40	0.605274	0.336	0.251	3.03e-35	CD39lo
Tcf20	1.2e-52	0.605133	0.498	0.401	3.86e-48	CD39lo
Wwp1	1.33e-18	0.604494	0.317	0.268	4.28e-14	CD39lo
Gphn	8.04e-52	0.602001	0.582	0.502	2.6e-47	CD39lo
Sec24b	1.45e-31	0.601965	0.28	0.207	4.68e-27	CD39lo
Rel	2.77e-40	0.601944	0.374	0.29	8.93e-36	CD39lo
Pik3r5	1.64e-27	0.601079	0.309	0.242	5.28e-23	CD39lo
Mbtd1	6.89e-34	0.600656	0.346	0.27	2.22e-29	CD39lo
Irf2bp2	3.95e-32	0.600572	0.296	0.223	1.28e-27	CD39lo
Ifi47	5.09e-66	0.600415	0.55	0.441	1.64e-61	CD39lo
Mtmr3	9.36e-44	0.599987	0.402	0.312	3.02e-39	CD39lo
Stambpl1	2.69e-43	0.599846	0.338	0.246	8.69e-39	CD39lo
Cog5	8.73e-59	0.598992	0.605	0.519	2.82e-54	CD39lo
Ikbkb	4.78e-34	0.598784	0.298	0.221	1.54e-29	CD39lo
Trim14	1.46e-44	0.598567	0.356	0.265	4.72e-40	CD39lo
Foxn3	5.15e-67	0.5982	0.567	0.46	1.66e-62	CD39lo
Mef2d	7.15e-37	0.597792	0.306	0.226	2.31e-32	CD39lo
Galnt6	1.02e-36	0.597733	0.338	0.258	3.29e-32	CD39lo
Hdac8	2.45e-49	0.596248	0.454	0.357	7.9e-45	CD39lo
Nufip2	4.99e-41	0.594864	0.497	0.42	1.61e-36	CD39lo
Pde4d	2.2e-30	0.593743	0.277	0.205	7.09e-26	CD39lo
mt-Nd5	2.73e-45	0.593486	0.67	0.625	8.82e-41	CD39lo
Exoc6	2.42e-29	0.593094	0.285	0.216	7.81e-25	CD39lo
Irf9	2.26e-31	0.591311	0.263	0.192	7.3e-27	CD39lo
Tomm5	4.21e-12	0.590706	0.473	0.449	1.36e-07	CD39lo
Mphosph10	1.99e-18	0.589009	0.298	0.247	6.42e-14	CD39lo
Cblb	3.75e-68	0.588937	0.781	0.718	1.21e-63	CD39lo
Eif4a2	1.38e-45	0.585441	0.439	0.35	4.46e-41	CD39lo
Asb3	8.11e-38	0.583714	0.332	0.249	2.62e-33	CD39lo
Tmcc1	9.5e-34	0.582115	0.368	0.29	3.07e-29	CD39lo
Farsa	5.86e-22	0.581967	0.287	0.23	1.89e-17	CD39lo
Hibadh	2.3e-29	0.581603	0.292	0.223	7.44e-25	CD39lo
Togaram1	9.36e-26	0.581393	0.274	0.21	3.02e-21	CD39lo
Zdhhc18	4.46e-55	0.580992	0.476	0.378	1.44e-50	CD39lo
Dap3	2.02e-26	0.578976	0.337	0.272	6.52e-22	CD39lo
Brd1	1.01e-35	0.57883	0.394	0.318	3.27e-31	CD39lo
Gnl3	9.29e-17	0.576132	0.381	0.337	3e-12	CD39lo
Vps13a	1.89e-52	0.575802	0.512	0.417	6.1e-48	CD39lo
Stk10	5.64e-54	0.575327	0.504	0.406	1.82e-49	CD39lo
Pibf1	1.51e-30	0.575068	0.282	0.211	4.88e-26	CD39lo
Atxn7	9.47e-38	0.574753	0.338	0.254	3.06e-33	CD39lo
Gm4951	3.57e-33	0.573958	0.318	0.239	1.15e-28	CD39lo
Adss	2.37e-36	0.573537	0.468	0.394	7.65e-32	CD39lo
Prkdc	2.81e-31	0.57281	0.348	0.274	9.07e-27	CD39lo
Rev3l	2.88e-43	0.572056	0.493	0.409	9.31e-39	CD39lo
Ppp4r2	2.15e-33	0.57167	0.372	0.294	6.95e-29	CD39lo
Tasor2	1.84e-38	0.571581	0.335	0.25	5.94e-34	CD39lo
St8sia4	1.61e-22	0.569548	0.267	0.209	5.2e-18	CD39lo
Rcor1	1.62e-43	0.569278	0.458	0.371	5.22e-39	CD39lo
Igtp	3.47e-58	0.568234	0.573	0.472	1.12e-53	CD39lo
Stx16	2.83e-37	0.567422	0.345	0.263	9.13e-33	CD39lo
Lrch3	3.12e-40	0.567196	0.413	0.326	1.01e-35	CD39lo
Cd8a	9.14e-65	0.565923	0.669	0.584	2.95e-60	CD39lo
Usp3	2.7e-70	0.565089	0.615	0.512	8.71e-66	CD39lo
Gimap3	8.94e-86	0.565003	0.652	0.542	2.89e-81	CD39lo
Irf1	1.31e-59	0.563667	0.595	0.492	4.24e-55	CD39lo
Rnf213	2.16e-32	0.56366	0.34	0.263	6.98e-28	CD39lo
Desi2	2.18e-32	0.56291	0.322	0.246	7.02e-28	CD39lo
Tigd2	1.05e-28	0.56241	0.267	0.199	3.39e-24	CD39lo
Hbs1l	3.3e-25	0.562328	0.308	0.244	1.06e-20	CD39lo
Baz2a	1.43e-32	0.562141	0.355	0.28	4.61e-28	CD39lo
Traf3ip3	2.43e-49	0.561573	0.466	0.371	7.86e-45	CD39lo
Dera	4.01e-26	0.561002	0.274	0.21	1.29e-21	CD39lo
Rb1cc1	1.41e-40	0.560908	0.39	0.303	4.56e-36	CD39lo
Rabac1	2.24e-66	0.560831	0.593	0.495	7.24e-62	CD39lo
Gbp8	3.02e-37	0.559757	0.32	0.238	9.75e-33	CD39lo
Dmxl1	2.13e-29	0.559549	0.314	0.243	6.87e-25	CD39lo
Aatf	1.33e-22	0.559378	0.332	0.273	4.29e-18	CD39lo
Ino80	4.1e-20	0.559165	0.306	0.252	1.32e-15	CD39lo
Abce1	2.55e-12	0.559049	0.315	0.28	8.23e-08	CD39lo
Asxl2	4.87e-44	0.558056	0.459	0.365	1.57e-39	CD39lo
Stk38	5.91e-31	0.557478	0.317	0.243	1.91e-26	CD39lo
Lrch1	6.01e-44	0.557238	0.506	0.419	1.94e-39	CD39lo
Kmt2a	5.26e-52	0.556984	0.549	0.452	1.7e-47	CD39lo
Pip5k1a	1.76e-26	0.55685	0.273	0.208	5.7e-22	CD39lo
Sumo1	1.72e-63	0.556224	0.657	0.577	5.56e-59	CD39lo
Ube2h	3.89e-53	0.555429	0.523	0.427	1.26e-48	CD39lo
Dcaf8	3.82e-34	0.554508	0.337	0.26	1.23e-29	CD39lo
Wdr20	3.5e-23	0.554503	0.267	0.207	1.13e-18	CD39lo
Larp4	7.01e-22	0.554178	0.347	0.289	2.26e-17	CD39lo
Zup1	1.13e-31	0.554049	0.307	0.232	3.66e-27	CD39lo
Btaf1	2.73e-23	0.553794	0.256	0.196	8.8e-19	CD39lo
Ccm2	1.66e-38	0.552826	0.377	0.292	5.35e-34	CD39lo
Usp24	4.38e-30	0.55235	0.316	0.243	1.41e-25	CD39lo
Trim44	1.6e-28	0.551769	0.356	0.287	5.17e-24	CD39lo
Rbm33	9.22e-30	0.551426	0.306	0.233	2.98e-25	CD39lo
Pcgf5	1.99e-43	0.55121	0.503	0.419	6.43e-39	CD39lo
Dip2b	1.91e-40	0.550763	0.484	0.4	6.18e-36	CD39lo
Ube4a	4.08e-24	0.5502	0.278	0.217	1.32e-19	CD39lo
Cers6	2.34e-20	0.549656	0.256	0.201	7.55e-16	CD39lo
Tmem131	8.91e-23	0.549574	0.254	0.195	2.88e-18	CD39lo
Lgals9	5.29e-36	0.549115	0.316	0.235	1.71e-31	CD39lo
Numb	6.78e-31	0.549067	0.363	0.289	2.19e-26	CD39lo
Hipk1	3.97e-25	0.549006	0.301	0.238	1.28e-20	CD39lo
Ncoa3	1.11e-28	0.548027	0.316	0.246	3.57e-24	CD39lo
Pced1b	5.96e-35	0.547098	0.327	0.248	1.92e-30	CD39lo
Spata13	7.8e-31	0.547051	0.321	0.248	2.52e-26	CD39lo
Sod2	8.94e-24	0.54678	0.332	0.271	2.89e-19	CD39lo
Spata5	1.85e-22	0.54641	0.391	0.336	5.98e-18	CD39lo
Gbp2	4.01e-38	0.545857	0.432	0.34	1.29e-33	CD39lo
Scai	9.33e-23	0.544121	0.26	0.201	3.01e-18	CD39lo
Ubn2	2.19e-44	0.543355	0.498	0.409	7.07e-40	CD39lo
Pigx	2.47e-28	0.543329	0.369	0.299	7.98e-24	CD39lo
Utp14a	4.23e-20	0.542449	0.278	0.224	1.37e-15	CD39lo
Ube2w	3.27e-26	0.541741	0.263	0.199	1.06e-21	CD39lo
1110038B12Rik	1.05e-21	0.541506	0.287	0.229	3.39e-17	CD39lo
Usp8	4.4e-26	0.540563	0.25	0.185	1.42e-21	CD39lo
Zyg11b	7.46e-27	0.540464	0.303	0.235	2.41e-22	CD39lo
Gls	2.09e-33	0.539491	0.554	0.491	6.74e-29	CD39lo
Clcn3	4.45e-35	0.538804	0.577	0.515	1.44e-30	CD39lo
Klf13	2.35e-65	0.538763	0.602	0.497	7.6e-61	CD39lo
Ppm1h	1.66e-84	0.537765	0.76	0.677	5.35e-80	CD39lo
Foxo1	1.54e-37	0.53769	0.431	0.347	4.97e-33	CD39lo
Tomm70a	8.32e-19	0.536855	0.33	0.28	2.68e-14	CD39lo
Nol11	7.09e-11	0.536065	0.314	0.284	2.29e-06	CD39lo
Xpa	2.49e-24	0.535006	0.25	0.189	8.05e-20	CD39lo
Stau1	2.12e-24	0.534587	0.277	0.215	6.84e-20	CD39lo
Chchd10	2.13e-14	0.534074	0.344	0.303	6.87e-10	CD39lo
Zcchc7	2.96e-49	0.53396	0.662	0.598	9.55e-45	CD39lo
Sesn3	1.86e-36	0.533624	0.395	0.313	6e-32	CD39lo
Alkbh1	1.21e-23	0.532851	0.398	0.34	3.91e-19	CD39lo
Ppat	5.03e-08	0.532697	0.274	0.248	0.00162237	CD39lo
Tet2	1.83e-24	0.532509	0.293	0.231	5.91e-20	CD39lo
Nop14	8.69e-18	0.530862	0.272	0.223	2.81e-13	CD39lo
Coro7	1.95e-21	0.529603	0.276	0.218	6.28e-17	CD39lo
Crtc3	5.76e-31	0.529547	0.353	0.279	1.86e-26	CD39lo
Pan3	2.23e-47	0.529191	0.579	0.491	7.21e-43	CD39lo
Rai1	8.37e-23	0.528799	0.282	0.222	2.7e-18	CD39lo
Ggps1	4.49e-30	0.5283	0.338	0.265	1.45e-25	CD39lo
Parp14	1.3e-28	0.528202	0.354	0.283	4.21e-24	CD39lo
Tlk1	5.17e-28	0.526916	0.418	0.352	1.67e-23	CD39lo
Frs2	7.7e-22	0.52662	0.26	0.202	2.49e-17	CD39lo
Glud1	1.76e-34	0.525792	0.579	0.519	5.67e-30	CD39lo
Ube2r2	2.07e-34	0.525504	0.416	0.34	6.7e-30	CD39lo
Taok1	5.69e-25	0.525492	0.323	0.258	1.84e-20	CD39lo
Arid1b	2.75e-43	0.524893	0.541	0.458	8.88e-39	CD39lo
Stat1	7.25e-97	0.524871	0.802	0.685	2.34e-92	CD39lo
Cacybp	7.96e-07	0.523844	0.425	0.416	0.0257054	CD39lo
Rps6kb1	1.79e-24	0.523392	0.362	0.298	5.78e-20	CD39lo
Ankrd10	3.88e-23	0.523319	0.311	0.25	1.25e-18	CD39lo
Kdm6a	3.36e-24	0.523212	0.376	0.314	1.09e-19	CD39lo
B3gnt2	1.47e-22	0.522979	0.361	0.3	4.76e-18	CD39lo
Mrpl9	3.07e-24	0.522867	0.271	0.208	9.93e-20	CD39lo
Slc2a3	1.46e-25	0.52286	0.474	0.419	4.71e-21	CD39lo
Nr3c1	2.73e-29	0.522811	0.421	0.352	8.82e-25	CD39lo
Itk	1.13e-79	0.52243	0.892	0.86	3.65e-75	CD39lo
Prpf39	4.11e-27	0.522069	0.286	0.218	1.33e-22	CD39lo
Retreg1	3.29e-20	0.521521	0.314	0.259	1.06e-15	CD39lo
Naa16	7.71e-21	0.521437	0.306	0.251	2.49e-16	CD39lo
Nt5dc1	9.36e-25	0.520938	0.325	0.263	3.02e-20	CD39lo
Ythdf3	1.17e-38	0.520144	0.414	0.327	3.78e-34	CD39lo
Parp9	1.02e-36	0.520091	0.431	0.348	3.3e-32	CD39lo
Ankib1	3.99e-28	0.51986	0.508	0.449	1.29e-23	CD39lo
Arih1	4.37e-51	0.519827	0.684	0.615	1.41e-46	CD39lo
Pdk1	2.2e-37	0.519628	0.418	0.333	7.11e-33	CD39lo
Atad2b	9.65e-36	0.518937	0.459	0.38	3.12e-31	CD39lo
Trpc4ap	1.75e-29	0.518875	0.293	0.222	5.66e-25	CD39lo
Anp32a	5.47e-34	0.518188	0.614	0.559	1.77e-29	CD39lo
Svil	3.43e-28	0.517837	0.345	0.277	1.11e-23	CD39lo
Agfg1	7.52e-40	0.516631	0.536	0.454	2.43e-35	CD39lo
Cd28	1.26e-34	0.516624	0.579	0.52	4.07e-30	CD39lo
Enox2	5.14e-21	0.51653	0.338	0.281	1.66e-16	CD39lo
Zmynd8	1.5e-30	0.516388	0.438	0.37	4.85e-26	CD39lo
Trbc2	3.72e-138	0.516305	0.992	0.994	1.2e-133	CD39lo
Kat2b	2.34e-32	0.516052	0.37	0.293	7.57e-28	CD39lo
Gon4l	1.62e-24	0.515914	0.375	0.314	5.24e-20	CD39lo
Supt4a	1.4e-59	0.515887	0.682	0.609	4.5e-55	CD39lo
Ankrd12	3.32e-54	0.514813	0.58	0.483	1.07e-49	CD39lo
Atf7	1.02e-25	0.514173	0.357	0.291	3.3e-21	CD39lo
Ahctf1	3.47e-17	0.514168	0.281	0.231	1.12e-12	CD39lo
Hdac4	6.6e-20	0.513691	0.329	0.274	2.13e-15	CD39lo
Pcca	1.22e-22	0.5136	0.31	0.25	3.94e-18	CD39lo
Wasl	1.9e-29	0.510554	0.319	0.246	6.14e-25	CD39lo
Sbds	4.57e-30	0.510164	0.349	0.276	1.47e-25	CD39lo
Prdm2	5.09e-24	0.510153	0.288	0.225	1.64e-19	CD39lo
Max	3.02e-26	0.510124	0.358	0.291	9.74e-22	CD39lo
Prkce	1.21e-22	0.510047	0.315	0.254	3.9e-18	CD39lo
Huwe1	3.8e-26	0.509691	0.555	0.511	1.23e-21	CD39lo
Ubr2	6.68e-36	0.50917	0.472	0.395	2.16e-31	CD39lo
Mia2	4.43e-27	0.509053	0.393	0.325	1.43e-22	CD39lo
Tm9sf2	2.82e-23	0.508834	0.341	0.28	9.09e-19	CD39lo
Gatad2b	1.54e-28	0.508373	0.422	0.355	4.96e-24	CD39lo
Nsun2	3.74e-08	0.507388	0.326	0.302	0.00120707	CD39lo
Pnrc1	1.08e-71	0.507368	0.65	0.547	3.49e-67	CD39lo
Sik2	1.29e-25	0.507119	0.312	0.246	4.16e-21	CD39lo
Rabl6	1.28e-19	0.505514	0.294	0.238	4.13e-15	CD39lo
Pafah1b3	2.37e-26	0.505478	0.321	0.254	7.65e-22	CD39lo
Stk4	2.92e-51	0.504865	0.579	0.485	9.43e-47	CD39lo
Znrf3	6.11e-27	0.504548	0.437	0.371	1.97e-22	CD39lo
Chordc1	2.08e-22	0.504103	0.358	0.298	6.72e-18	CD39lo
Gramd1b	2.23e-41	0.504095	0.573	0.496	7.21e-37	CD39lo
Zfp280d	2.97e-27	0.503395	0.412	0.346	9.59e-23	CD39lo
Rprd2	2.07e-24	0.502863	0.306	0.242	6.69e-20	CD39lo
Apc	3.95e-31	0.502672	0.36	0.284	1.27e-26	CD39lo
Supt6	1.14e-28	0.501619	0.376	0.304	3.68e-24	CD39lo
R3hdm1	3.81e-29	0.501329	0.52	0.46	1.23e-24	CD39lo
Chd6	1.07e-30	0.501137	0.363	0.287	3.46e-26	CD39lo
Xpo6	1.54e-17	0.500615	0.307	0.257	4.96e-13	CD39lo
Dnmt3a	5.33e-20	0.500613	0.286	0.23	1.72e-15	CD39lo
Akap9	2.96e-36	0.500423	0.504	0.426	9.55e-32	CD39lo
Uty	7.27e-29	0.50013	0.4	0.33	2.35e-24	CD39lo
Rptor	1.95e-26	0.499982	0.394	0.327	6.28e-22	CD39lo
Smn1	4.47e-12	0.499876	0.293	0.255	1.44e-07	CD39lo
Ubash3a	1.57e-27	0.499873	0.35	0.28	5.06e-23	CD39lo
Cnbp	2.42e-19	0.499119	0.604	0.575	7.83e-15	CD39lo
Eif1a	1.53e-15	0.498951	0.36	0.316	4.95e-11	CD39lo
Saraf	7.89e-68	0.498904	0.661	0.564	2.55e-63	CD39lo
Tnrc6c	2.38e-47	0.498689	0.547	0.452	7.69e-43	CD39lo
Atp6v1h	2.23e-20	0.498432	0.263	0.207	7.2e-16	CD39lo
Arhgef18	1.71e-27	0.498299	0.404	0.337	5.52e-23	CD39lo
Zfp292	3.14e-62	0.498052	0.714	0.632	1.01e-57	CD39lo
Egln3	4.91e-13	0.497874	0.396	0.364	1.59e-08	CD39lo
Tmem87a	2.63e-19	0.497501	0.291	0.237	8.48e-15	CD39lo
Pak2	3.21e-32	0.49742	0.696	0.662	1.04e-27	CD39lo
1810026B05Rik	1.6e-37	0.497261	0.448	0.361	5.15e-33	CD39lo
Fto	1.64e-26	0.497204	0.405	0.338	5.3e-22	CD39lo
Il21r	1.09e-14	0.497162	0.297	0.252	3.52e-10	CD39lo
Ambra1	8.76e-47	0.496929	0.609	0.531	2.83e-42	CD39lo
Grap2	9.55e-64	0.496792	0.866	0.825	3.08e-59	CD39lo
Abcb7	2.61e-20	0.496337	0.282	0.226	8.42e-16	CD39lo
Rc3h2	5.54e-24	0.496295	0.28	0.217	1.79e-19	CD39lo
Nipbl	1.09e-53	0.496028	0.692	0.622	3.53e-49	CD39lo
Kdm2a	3.15e-43	0.495459	0.557	0.475	1.02e-38	CD39lo
Rab10	1.66e-31	0.495406	0.563	0.513	5.37e-27	CD39lo
Dennd1c	2.97e-25	0.494278	0.287	0.222	9.59e-21	CD39lo
Ftsj3	3.05e-08	0.494147	0.263	0.236	0.000985746	CD39lo
Tmx4	1.8e-19	0.493927	0.262	0.208	5.81e-15	CD39lo
Fam168a	1.78e-23	0.493687	0.346	0.284	5.76e-19	CD39lo
Fbxo38	1.21e-24	0.493452	0.298	0.234	3.9e-20	CD39lo
Tlk2	2.34e-24	0.493386	0.367	0.302	7.54e-20	CD39lo
Atf2	4.72e-22	0.491879	0.315	0.255	1.53e-17	CD39lo
Crlf3	8.18e-36	0.491751	0.441	0.36	2.64e-31	CD39lo
Irf2	7.38e-45	0.491135	0.548	0.467	2.38e-40	CD39lo
Nsf	2.46e-24	0.490736	0.368	0.304	7.94e-20	CD39lo
Clk1	4.87e-65	0.489429	0.653	0.557	1.57e-60	CD39lo
Phf6	7.03e-24	0.489106	0.367	0.304	2.27e-19	CD39lo
Fyb	1.11e-87	0.48901	0.832	0.76	3.57e-83	CD39lo
Mthfd1l	2.31e-17	0.488926	0.535	0.51	7.44e-13	CD39lo
Ppdpf	7.12e-27	0.488912	0.406	0.341	2.3e-22	CD39lo
Prrc2c	1.97e-41	0.488907	0.794	0.76	6.34e-37	CD39lo
Neurl3	1.72e-23	0.488718	0.272	0.21	5.54e-19	CD39lo
Mxi1	7.88e-18	0.488456	0.385	0.336	2.54e-13	CD39lo
Rps25	5.87e-30	0.487885	0.953	0.959	1.9e-25	CD39lo
Rsl1d1	3.82e-09	0.487478	0.482	0.466	0.000123202	CD39lo
Gapvd1	1.39e-22	0.487475	0.455	0.4	4.48e-18	CD39lo
Ccnl1	6.97e-36	0.48744	0.483	0.405	2.25e-31	CD39lo
Gbp6	4.04e-26	0.487098	0.394	0.324	1.31e-21	CD39lo
2025-03-07	4.46e-34	0.48672	0.416	0.334	1.44e-29	CD39lo
Ssbp3	9.26e-27	0.486677	0.461	0.399	2.99e-22	CD39lo
Braf	1.69e-21	0.486649	0.382	0.323	5.45e-17	CD39lo
Swt1	8.35e-24	0.486572	0.293	0.23	2.7e-19	CD39lo
Tle4	3.15e-32	0.486565	0.397	0.318	1.02e-27	CD39lo
Rsbn1	1.69e-21	0.486014	0.307	0.247	5.46e-17	CD39lo
Hdac7	1.42e-22	0.485956	0.446	0.393	4.57e-18	CD39lo
Slfn2	8.64e-55	0.485725	0.619	0.531	2.79e-50	CD39lo
Nlrc5	3.69e-44	0.485647	0.627	0.557	1.19e-39	CD39lo
Cnot6l	2.92e-40	0.485603	0.528	0.444	9.44e-36	CD39lo
Kdm5a	2.66e-43	0.485508	0.511	0.425	8.6e-39	CD39lo
Ms4a6b	6.39e-87	0.485227	0.815	0.744	2.06e-82	CD39lo
Akap10	1.14e-26	0.484867	0.374	0.306	3.68e-22	CD39lo
Ep300	2.12e-24	0.484796	0.327	0.262	6.83e-20	CD39lo
Trps1	1.29e-10	0.484725	0.279	0.245	4.17e-06	CD39lo
Smim14	1.14e-29	0.484165	0.354	0.279	3.68e-25	CD39lo
Elf1	1.76e-48	0.483981	0.66	0.595	5.67e-44	CD39lo
Ppp2r2a	2.36e-26	0.48265	0.471	0.409	7.61e-22	CD39lo
Strn3	3.73e-36	0.482636	0.563	0.494	1.2e-31	CD39lo
Ddt	5.96e-26	0.482448	0.396	0.331	1.93e-21	CD39lo
Scfd1	2.56e-23	0.482124	0.338	0.275	8.28e-19	CD39lo
Sik3	6.73e-42	0.481752	0.622	0.549	2.17e-37	CD39lo
Slc28a2	3.26e-21	0.48137	0.252	0.194	1.05e-16	CD39lo
Ubr3	2.56e-21	0.480951	0.359	0.301	8.26e-17	CD39lo
Arl6ip5	2.3e-29	0.480542	0.399	0.326	7.44e-25	CD39lo
Relch	2.32e-24	0.480439	0.342	0.276	7.5e-20	CD39lo
Mat2a	2.38e-11	0.479907	0.416	0.385	7.69e-07	CD39lo
Cyld	1.73e-36	0.479805	0.462	0.38	5.58e-32	CD39lo
Prkacb	3.44e-31	0.479668	0.467	0.394	1.11e-26	CD39lo
Ralgapa1	1.57e-27	0.47962	0.449	0.382	5.08e-23	CD39lo
Smg1	2.1e-27	0.479392	0.509	0.452	6.78e-23	CD39lo
Zdhhc20	2.49e-39	0.479333	0.457	0.37	8.02e-35	CD39lo
Parp8	2.08e-30	0.478813	0.486	0.416	6.72e-26	CD39lo
Rpl7l1	4.31e-15	0.478534	0.317	0.271	1.39e-10	CD39lo
Rad23b	2.77e-16	0.477936	0.37	0.324	8.95e-12	CD39lo
Ppme1	1.13e-22	0.477803	0.366	0.305	3.66e-18	CD39lo
Ppp4r3b	1.33e-29	0.476492	0.478	0.41	4.28e-25	CD39lo
Rab3gap1	4.83e-27	0.475746	0.39	0.32	1.56e-22	CD39lo
Tor1aip2	7.89e-22	0.475336	0.377	0.319	2.55e-17	CD39lo
Rapgef6	3.93e-73	0.475271	0.846	0.801	1.27e-68	CD39lo
Dapp1	6.51e-18	0.475219	0.262	0.21	2.1e-13	CD39lo
Arid5b	7.66e-29	0.475126	0.481	0.413	2.47e-24	CD39lo
Mier1	2.31e-41	0.474887	0.692	0.645	7.44e-37	CD39lo
Tomm40	1.14e-07	0.474538	0.315	0.291	0.00368257	CD39lo
Srsf5	1e-59	0.474033	0.725	0.656	3.24e-55	CD39lo
Zmym4	4.07e-14	0.473968	0.29	0.246	1.32e-09	CD39lo
Nek7	4.09e-26	0.473904	0.441	0.375	1.32e-21	CD39lo
Smg6	2.27e-57	0.473889	0.677	0.586	7.34e-53	CD39lo
Klf6	9.89e-20	0.473579	0.463	0.413	3.19e-15	CD39lo
Bin2	2.52e-25	0.47342	0.388	0.325	8.15e-21	CD39lo
Foxj3	1.11e-18	0.47295	0.29	0.236	3.59e-14	CD39lo
Zfand3	1.08e-31	0.47294	0.465	0.391	3.48e-27	CD39lo
Cdc42se2	1.44e-35	0.472912	0.498	0.422	4.66e-31	CD39lo
Tab2	9.74e-28	0.472737	0.488	0.423	3.15e-23	CD39lo
Foxn2	1.84e-15	0.472437	0.254	0.206	5.95e-11	CD39lo
Lonp2	4.77e-32	0.472226	0.377	0.298	1.54e-27	CD39lo
Nub1	2.97e-35	0.472206	0.467	0.387	9.57e-31	CD39lo
Gpbp1	6.31e-23	0.471682	0.433	0.374	2.04e-18	CD39lo
Cdk12	2.07e-28	0.471359	0.492	0.426	6.68e-24	CD39lo
Trpm7	2.63e-29	0.471321	0.422	0.348	8.5e-25	CD39lo
Mrps9	1.74e-19	0.471278	0.368	0.313	5.62e-15	CD39lo
Uck2	2.96e-08	0.47127	0.381	0.359	0.000956615	CD39lo
Gpx1	3.83e-08	0.471214	0.466	0.453	0.00123643	CD39lo
Kdm3a	6.61e-23	0.470985	0.38	0.318	2.13e-18	CD39lo
Ankrd28	1.31e-09	0.470865	0.265	0.233	4.21e-05	CD39lo
Chd2	1.28e-41	0.470794	0.645	0.567	4.12e-37	CD39lo
Ubr5	4.53e-17	0.470704	0.349	0.3	1.46e-12	CD39lo
Ncoa2	3.41e-40	0.47054	0.606	0.53	1.1e-35	CD39lo
Ptpn4	2.31e-15	0.470497	0.301	0.254	7.45e-11	CD39lo
Pten	1.18e-19	0.470205	0.455	0.408	3.81e-15	CD39lo
Wdr33	5.98e-43	0.469804	0.631	0.556	1.93e-38	CD39lo
Slc25a12	5.47e-18	0.469228	0.28	0.227	1.76e-13	CD39lo
Senp7	4.29e-27	0.468967	0.367	0.297	1.39e-22	CD39lo
Tnfrsf18	6.61e-15	0.468564	0.435	0.392	2.13e-10	CD39lo
Smad4	1.42e-21	0.468557	0.278	0.219	4.6e-17	CD39lo
Ecpas	5.02e-19	0.468549	0.44	0.392	1.62e-14	CD39lo
Traf6	1.64e-19	0.468487	0.273	0.217	5.31e-15	CD39lo
Ttc14	4.05e-34	0.46807	0.48	0.405	1.31e-29	CD39lo
Nsd3	2.3e-60	0.467805	0.783	0.723	7.41e-56	CD39lo
Cnot4	3.21e-31	0.467303	0.571	0.512	1.04e-26	CD39lo
Ogfr	2e-19	0.467114	0.273	0.218	6.46e-15	CD39lo
Scfd2	1.14e-18	0.466994	0.342	0.29	3.7e-14	CD39lo
Fnip1	9.71e-23	0.466986	0.453	0.397	3.13e-18	CD39lo
Trim33	4.42e-22	0.466779	0.38	0.32	1.43e-17	CD39lo
Ndufa4	1.66e-11	0.466383	0.679	0.665	5.37e-07	CD39lo
Pik3c2a	9.18e-19	0.466001	0.295	0.24	2.96e-14	CD39lo
Hectd4	2.61e-19	0.465771	0.257	0.202	8.42e-15	CD39lo
Arfgef1	6.52e-24	0.46429	0.431	0.372	2.1e-19	CD39lo
Ano6	8.68e-16	0.463995	0.289	0.242	2.8e-11	CD39lo
Pitpna	5.76e-27	0.463629	0.541	0.492	1.86e-22	CD39lo
Rictor	5.5e-21	0.463315	0.438	0.384	1.78e-16	CD39lo
Nufip1	1.86e-11	0.46326	0.264	0.226	6.02e-07	CD39lo
Nvl	1.42e-17	0.462669	0.293	0.241	4.57e-13	CD39lo
Rfx7	6.17e-44	0.462644	0.662	0.596	1.99e-39	CD39lo
Mbd5	1.74e-26	0.462463	0.505	0.447	5.63e-22	CD39lo
Ankrd17	1.79e-29	0.462447	0.653	0.606	5.76e-25	CD39lo
Cdkal1	4.36e-25	0.462433	0.436	0.371	1.41e-20	CD39lo
Ccnh	4.85e-22	0.462407	0.34	0.279	1.56e-17	CD39lo
Mrps5	4.19e-13	0.461905	0.327	0.286	1.35e-08	CD39lo
Ube4b	4.89e-17	0.461397	0.284	0.233	1.58e-12	CD39lo
Hspa4	1.72e-10	0.461319	0.57	0.559	5.54e-06	CD39lo
Tbl1x	8.6e-18	0.46117	0.437	0.391	2.78e-13	CD39lo
Snx2	4.41e-20	0.460601	0.305	0.248	1.42e-15	CD39lo
Taf11	6.91e-15	0.460403	0.254	0.209	2.23e-10	CD39lo
Ulk2	9.09e-19	0.459965	0.259	0.205	2.94e-14	CD39lo
Ube2g1	1.7e-23	0.459871	0.475	0.418	5.48e-19	CD39lo
Srrm2	4.91e-45	0.459705	0.866	0.842	1.58e-40	CD39lo
Prdx2	1.52e-16	0.459641	0.574	0.552	4.91e-12	CD39lo
Gas5	9.54e-48	0.459289	0.84	0.818	3.08e-43	CD39lo
Cdc73	4.36e-18	0.459268	0.338	0.285	1.41e-13	CD39lo
Sptan1	2.47e-19	0.459222	0.397	0.344	7.99e-15	CD39lo
Heca	8.82e-22	0.45885	0.299	0.238	2.85e-17	CD39lo
Map4k1	8.38e-15	0.458803	0.298	0.253	2.71e-10	CD39lo
Rbm6	3.17e-32	0.45799	0.573	0.511	1.02e-27	CD39lo
Gbe1	6.17e-13	0.457827	0.329	0.287	1.99e-08	CD39lo
Nipa2	4.29e-14	0.457466	0.301	0.256	1.39e-09	CD39lo
Ddx23	3.59e-17	0.457356	0.256	0.205	1.16e-12	CD39lo
Ino80d	1.86e-16	0.457323	0.294	0.245	6.02e-12	CD39lo
Cluap1	3.06e-21	0.457035	0.287	0.227	9.87e-17	CD39lo
Map4k4	3.24e-23	0.456854	0.453	0.396	1.05e-18	CD39lo
Orc3	2.9e-18	0.456734	0.301	0.247	9.35e-14	CD39lo
Fam172a	1.17e-40	0.456675	0.691	0.636	3.78e-36	CD39lo
Zmiz2	2.68e-15	0.456624	0.251	0.204	8.64e-11	CD39lo
Phtf1	3.41e-14	0.456266	0.257	0.212	1.1e-09	CD39lo
Atm	4.52e-18	0.456077	0.305	0.251	1.46e-13	CD39lo
Med1	2.34e-18	0.455796	0.352	0.301	7.57e-14	CD39lo
Prrc2b	2.09e-22	0.455691	0.377	0.316	6.75e-18	CD39lo
Stx8	1.97e-27	0.45562	0.49	0.43	6.35e-23	CD39lo
Kansl1	1.08e-52	0.455499	0.804	0.762	3.48e-48	CD39lo
Thumpd1	1.99e-12	0.455338	0.261	0.22	6.42e-08	CD39lo
Vgll4	1.96e-20	0.454617	0.361	0.303	6.32e-16	CD39lo
Chchd2	2.94e-14	0.454354	0.778	0.8	9.48e-10	CD39lo
Slmap	4.25e-18	0.454324	0.35	0.297	1.37e-13	CD39lo
Wdr37	1.97e-16	0.454072	0.25	0.2	6.35e-12	CD39lo
Acaa2	1.61e-19	0.454045	0.27	0.214	5.2e-15	CD39lo
Dennd1a	5.56e-27	0.45396	0.579	0.531	1.79e-22	CD39lo
Acaca	4.06e-07	0.453802	0.274	0.248	0.0131095	CD39lo
Nsd1	3.63e-31	0.453732	0.576	0.512	1.17e-26	CD39lo
Tbc1d5	1.09e-26	0.453716	0.548	0.493	3.53e-22	CD39lo
Ctnnbl1	1.61e-19	0.453434	0.336	0.281	5.21e-15	CD39lo
Gtpbp4	3.14e-07	0.453038	0.363	0.342	0.0101332	CD39lo
Xpo4	2.09e-14	0.452535	0.325	0.281	6.75e-10	CD39lo
Mga	8.25e-16	0.452457	0.269	0.22	2.66e-11	CD39lo
Srsf10	4.24e-11	0.451562	0.482	0.462	1.37e-06	CD39lo
Ly75	5.89e-13	0.451504	0.252	0.21	1.9e-08	CD39lo
Ash1l	3.1e-30	0.451237	0.523	0.461	1e-25	CD39lo
Rsf1	8.35e-29	0.451161	0.502	0.438	2.7e-24	CD39lo
Atp11b	4.95e-33	0.451154	0.707	0.663	1.6e-28	CD39lo
Rnf111	2.38e-20	0.450724	0.341	0.282	7.69e-16	CD39lo
Aco2	6.36e-09	0.450441	0.427	0.408	0.000205322	CD39lo
Chd1	3.96e-20	0.450294	0.381	0.323	1.28e-15	CD39lo
Sap18	1.45e-14	0.450135	0.319	0.274	4.69e-10	CD39lo
Srpk1	4.54e-23	0.450088	0.51	0.459	1.47e-18	CD39lo
Sf3b3	3.99e-16	0.449988	0.466	0.429	1.29e-11	CD39lo
Larp1	3.35e-19	0.449874	0.51	0.466	1.08e-14	CD39lo
Ruvbl1	2.99e-07	0.449705	0.306	0.28	0.0096423	CD39lo
Ttc39b	4.13e-23	0.449676	0.421	0.359	1.33e-18	CD39lo
Trip12	1.19e-26	0.449658	0.518	0.457	3.86e-22	CD39lo
Snx25	3.02e-17	0.44928	0.361	0.311	9.76e-13	CD39lo
Eef1akmt1	5.75e-12	0.448887	0.253	0.214	1.86e-07	CD39lo
Parg	3.39e-17	0.448791	0.259	0.208	1.1e-12	CD39lo
Cwc27	1.63e-15	0.448603	0.334	0.288	5.27e-11	CD39lo
Rnf38	1.02e-18	0.448149	0.258	0.203	3.28e-14	CD39lo
Epc2	1.08e-18	0.448148	0.306	0.251	3.5e-14	CD39lo
Rlim	3.04e-31	0.448065	0.523	0.457	9.8e-27	CD39lo
Npepps	2.01e-19	0.447888	0.439	0.393	6.5e-15	CD39lo
Ccser2	1.71e-15	0.447574	0.253	0.206	5.51e-11	CD39lo
Phf3	1.18e-29	0.447542	0.505	0.439	3.82e-25	CD39lo
Pum1	3.92e-23	0.447474	0.526	0.47	1.27e-18	CD39lo
Ccdc58	5.05e-13	0.447015	0.309	0.267	1.63e-08	CD39lo
Zfp644	2.05e-32	0.446485	0.459	0.382	6.63e-28	CD39lo
Avl9	8.9e-23	0.446437	0.344	0.282	2.87e-18	CD39lo
Luc7l	1.03e-13	0.446431	0.334	0.292	3.34e-09	CD39lo
Ass1	2.25e-08	0.446258	0.288	0.259	0.000727869	CD39lo
Bicra	2.88e-17	0.445978	0.265	0.213	9.28e-13	CD39lo
Atf6	1.53e-12	0.445939	0.328	0.289	4.92e-08	CD39lo
Secisbp2	1.37e-17	0.445901	0.305	0.252	4.41e-13	CD39lo
Cdk13	5.7e-31	0.445777	0.503	0.425	1.84e-26	CD39lo
Junb	4.67e-16	0.445266	0.535	0.5	1.51e-11	CD39lo
Cnot2	1.77e-24	0.445096	0.463	0.401	5.72e-20	CD39lo
Snx17	2.18e-17	0.445084	0.282	0.23	7.03e-13	CD39lo
Atp9b	1.51e-22	0.445008	0.371	0.308	4.86e-18	CD39lo
Tbc1d15	5.7e-15	0.444642	0.275	0.229	1.84e-10	CD39lo
Pcf11	3.07e-16	0.443916	0.283	0.233	9.92e-12	CD39lo
Ppp1r16b	4.64e-24	0.443889	0.463	0.402	1.5e-19	CD39lo
Dpm1	1.99e-24	0.443881	0.464	0.407	6.42e-20	CD39lo
Erbin	3.09e-30	0.443379	0.471	0.398	9.98e-26	CD39lo
Cbl	3.19e-26	0.443224	0.444	0.375	1.03e-21	CD39lo
Uri1	7.75e-18	0.443123	0.362	0.31	2.5e-13	CD39lo
Rap1gds1	7.8e-16	0.44306	0.518	0.482	2.52e-11	CD39lo
Mrtfa	4.29e-24	0.442913	0.389	0.323	1.38e-19	CD39lo
9930021J03Rik	5.74e-18	0.442551	0.296	0.242	1.85e-13	CD39lo
Cdc40	2.23e-22	0.441537	0.375	0.312	7.2e-18	CD39lo
Abcc1	1.31e-12	0.441373	0.258	0.217	4.23e-08	CD39lo
Chm	7.11e-13	0.440654	0.287	0.245	2.3e-08	CD39lo
Epc1	3.15e-24	0.440634	0.454	0.392	1.02e-19	CD39lo
Exosc7	1.86e-13	0.44063	0.352	0.31	5.99e-09	CD39lo
Mbnl1	1.33e-65	0.440115	0.94	0.93	4.29e-61	CD39lo
Drg1	4.06e-19	0.439719	0.474	0.428	1.31e-14	CD39lo
Brix1	2.73e-11	0.439349	0.334	0.299	8.8e-07	CD39lo
Kmt2c	1.01e-29	0.438868	0.479	0.407	3.27e-25	CD39lo
Sacm1l	7.28e-21	0.438713	0.323	0.262	2.35e-16	CD39lo
Mllt10	4.45e-29	0.438682	0.653	0.604	1.44e-24	CD39lo
Aebp2	4.3e-20	0.438353	0.483	0.433	1.39e-15	CD39lo
Jakmip1	2.66e-20	0.438344	0.288	0.23	8.57e-16	CD39lo
Psme4	2.37e-17	0.43828	0.352	0.299	7.66e-13	CD39lo
Synj1	3.17e-13	0.437687	0.264	0.22	1.02e-08	CD39lo
Ifi27l2a	6.46e-44	0.437558	0.76	0.691	2.09e-39	CD39lo
Mlxip	2.39e-15	0.437471	0.252	0.205	7.71e-11	CD39lo
Hnrnpc	1.16e-10	0.437445	0.676	0.681	3.74e-06	CD39lo
Cep120	1.22e-16	0.437445	0.289	0.238	3.92e-12	CD39lo
Hypk	2.1e-11	0.437379	0.312	0.275	6.77e-07	CD39lo
Ifrd1	7.4e-13	0.437156	0.322	0.279	2.39e-08	CD39lo
Pnisr	7.84e-38	0.437086	0.55	0.473	2.53e-33	CD39lo
Nt5c	1.67e-16	0.437043	0.45	0.407	5.39e-12	CD39lo
Rasa1	1.69e-19	0.436838	0.473	0.426	5.44e-15	CD39lo
Arid2	2.69e-17	0.436793	0.335	0.282	8.68e-13	CD39lo
Otud5	3.56e-15	0.43673	0.269	0.221	1.15e-10	CD39lo
Dido1	4.17e-17	0.436689	0.359	0.307	1.35e-12	CD39lo
Tmem59	1.18e-33	0.436621	0.472	0.392	3.82e-29	CD39lo
Zeb1	1.71e-25	0.436588	0.588	0.535	5.52e-21	CD39lo
Smg7	1.63e-15	0.436495	0.39	0.345	5.25e-11	CD39lo
Ago3	7.38e-16	0.436231	0.264	0.215	2.38e-11	CD39lo
Nampt	2e-16	0.436002	0.321	0.272	6.46e-12	CD39lo
Dis3l2	6.65e-22	0.435132	0.396	0.334	2.15e-17	CD39lo
Cebpz	1.86e-12	0.435091	0.366	0.327	6.02e-08	CD39lo
Commd7	1.73e-17	0.43492	0.301	0.248	5.58e-13	CD39lo
Kdm3b	4.99e-20	0.434591	0.326	0.267	1.61e-15	CD39lo
Tent4b	5.1e-14	0.433858	0.312	0.267	1.65e-09	CD39lo
Ube2v2	1.62e-14	0.433069	0.305	0.259	5.23e-10	CD39lo
Kpna1	6.36e-16	0.433045	0.293	0.244	2.05e-11	CD39lo
Sel1l	3.94e-14	0.432899	0.259	0.214	1.27e-09	CD39lo
Scand1	1.17e-32	0.432543	0.557	0.494	3.76e-28	CD39lo
Crebbp	4.11e-27	0.432339	0.503	0.438	1.33e-22	CD39lo
mt-Nd2	9.61e-17	0.432198	0.931	0.942	3.1e-12	CD39lo
Scaf8	1.68e-22	0.431953	0.468	0.411	5.42e-18	CD39lo
Tomm20	3.27e-07	0.4317	0.689	0.698	0.010542	CD39lo
Phf20	1.3e-16	0.431491	0.347	0.297	4.19e-12	CD39lo
Tnpo1	3.91e-20	0.431483	0.42	0.364	1.26e-15	CD39lo
Setd3	4.18e-15	0.43127	0.343	0.298	1.35e-10	CD39lo
Susd6	3.3e-24	0.431245	0.409	0.342	1.07e-19	CD39lo
Nip7	4.18e-08	0.431138	0.252	0.223	0.00134971	CD39lo
Msh2	5.62e-11	0.430916	0.27	0.233	1.81e-06	CD39lo
Chfr	7.25e-15	0.430825	0.261	0.214	2.34e-10	CD39lo
Itch	1.01e-26	0.430606	0.498	0.431	3.28e-22	CD39lo
Gigyf2	4.18e-21	0.430597	0.368	0.307	1.35e-16	CD39lo
Snrnp48	1.32e-17	0.430346	0.348	0.297	4.28e-13	CD39lo
Adnp	2.66e-16	0.430226	0.331	0.281	8.58e-12	CD39lo
Ubac2	9.71e-35	0.430052	0.607	0.541	3.14e-30	CD39lo
Zc3hav1	1.38e-45	0.429892	0.675	0.602	4.46e-41	CD39lo
Lrba	4.67e-24	0.429803	0.561	0.51	1.51e-19	CD39lo
Parp1	4.63e-08	0.429705	0.353	0.33	0.00149577	CD39lo
Atad1	2.27e-12	0.429537	0.262	0.221	7.32e-08	CD39lo
Dym	3.01e-15	0.429433	0.316	0.267	9.7e-11	CD39lo
Kdm4c	4.82e-21	0.428989	0.388	0.328	1.55e-16	CD39lo
Mrpl11	2.42e-09	0.42873	0.298	0.266	7.83e-05	CD39lo
Cul3	4.96e-24	0.428532	0.558	0.513	1.6e-19	CD39lo
Med6	6.77e-14	0.428358	0.253	0.209	2.19e-09	CD39lo
Snd1	7.55e-15	0.428352	0.573	0.539	2.44e-10	CD39lo
Stk24	1.48e-16	0.42799	0.465	0.423	4.78e-12	CD39lo
Ilrun	4.58e-18	0.427946	0.342	0.289	1.48e-13	CD39lo
Yme1l1	1.96e-18	0.427807	0.361	0.307	6.34e-14	CD39lo
Rsl24d1	4.04e-08	0.42742	0.303	0.274	0.00130399	CD39lo
Acbd5	2.25e-17	0.427419	0.304	0.25	7.27e-13	CD39lo
Clns1a	7.52e-13	0.427209	0.327	0.285	2.43e-08	CD39lo
Sec24a	2.69e-13	0.427089	0.328	0.285	8.69e-09	CD39lo
Slc12a6	1.57e-18	0.42699	0.388	0.335	5.06e-14	CD39lo
Mrpl36	9.8e-09	0.426803	0.329	0.301	0.00031642	CD39lo
Tbc1d1	1.38e-23	0.426582	0.492	0.434	4.46e-19	CD39lo
Washc2	3.47e-13	0.426352	0.252	0.209	1.12e-08	CD39lo
Tnfsf8	5.36e-18	0.425668	0.359	0.303	1.73e-13	CD39lo
Itgb7	2.89e-28	0.425601	0.596	0.541	9.33e-24	CD39lo
Stat3	5.14e-26	0.425117	0.585	0.526	1.66e-21	CD39lo
Utp18	2.06e-11	0.425111	0.307	0.268	6.66e-07	CD39lo
Pcmtd1	6.29e-22	0.425073	0.381	0.319	2.03e-17	CD39lo
Peak1	4.45e-27	0.424972	0.541	0.481	1.44e-22	CD39lo
Ptbp2	1.03e-15	0.424359	0.296	0.246	3.32e-11	CD39lo
Ap3s1	3.02e-16	0.424336	0.404	0.357	9.76e-12	CD39lo
Nifk	2.38e-08	0.423936	0.285	0.255	0.000769306	CD39lo
Rassf5	2.52e-17	0.423802	0.324	0.27	8.15e-13	CD39lo
Nup214	1.13e-14	0.423747	0.34	0.294	3.66e-10	CD39lo
Fbxo11	7.82e-22	0.42361	0.456	0.398	2.52e-17	CD39lo
Cept1	8.39e-17	0.423467	0.288	0.237	2.71e-12	CD39lo
Paip2	2.55e-29	0.423025	0.506	0.439	8.22e-25	CD39lo
Sdha	1.28e-18	0.422546	0.418	0.366	4.14e-14	CD39lo
Tnip1	1.15e-21	0.422496	0.326	0.262	3.71e-17	CD39lo
Mark3	5.81e-18	0.422125	0.319	0.265	1.87e-13	CD39lo
Dnttip2	2.8e-11	0.421827	0.331	0.294	9.05e-07	CD39lo
Xpr1	7.17e-20	0.421762	0.409	0.354	2.31e-15	CD39lo
Fbxw11	1.24e-15	0.421632	0.363	0.315	4.02e-11	CD39lo
Il12rb2	1.32e-31	0.421595	0.66	0.601	4.27e-27	CD39lo
Dcaf5	1.12e-18	0.421574	0.341	0.284	3.63e-14	CD39lo
Pex14	1.39e-13	0.421229	0.261	0.217	4.49e-09	CD39lo
Dpp8	2.17e-14	0.420211	0.31	0.264	7.02e-10	CD39lo
Fnbp4	1.44e-16	0.419755	0.432	0.387	4.65e-12	CD39lo
Rps6ka3	4.25e-29	0.419751	0.591	0.53	1.37e-24	CD39lo
Ss18	7.05e-16	0.419684	0.362	0.315	2.27e-11	CD39lo
Epb41	4.59e-21	0.419594	0.444	0.388	1.48e-16	CD39lo
Mia3	1.48e-18	0.419571	0.325	0.269	4.76e-14	CD39lo
Fbxl17	1.15e-23	0.419534	0.543	0.491	3.7e-19	CD39lo
Eya3	4.1e-15	0.419211	0.253	0.205	1.32e-10	CD39lo
Eif4g3	1.49e-20	0.419123	0.549	0.499	4.81e-16	CD39lo
Rundc3b	2.57e-16	0.418959	0.287	0.236	8.3e-12	CD39lo
Gtf3c1	2.42e-12	0.41888	0.271	0.229	7.81e-08	CD39lo
Ttc17	1.32e-17	0.418825	0.264	0.211	4.26e-13	CD39lo
Klhl18	4.06e-15	0.418411	0.258	0.21	1.31e-10	CD39lo
Akt3	5.46e-17	0.418245	0.463	0.419	1.76e-12	CD39lo
Chd9	1.72e-17	0.418177	0.421	0.371	5.55e-13	CD39lo
Zzz3	7.87e-14	0.418168	0.298	0.253	2.54e-09	CD39lo
Vti1a	6.94e-26	0.418088	0.622	0.577	2.24e-21	CD39lo
Cab39l	2.2e-13	0.417904	0.272	0.228	7.11e-09	CD39lo
Celf1	1.05e-19	0.417509	0.531	0.485	3.38e-15	CD39lo
Zfp148	6.91e-22	0.417297	0.549	0.5	2.23e-17	CD39lo
Npc2	6.23e-34	0.417098	0.74	0.704	2.01e-29	CD39lo
Fam98b	1.71e-08	0.416979	0.259	0.228	0.000552325	CD39lo
Mrpl34	5.24e-10	0.41662	0.408	0.381	1.69e-05	CD39lo
Cbfa2t2	5.26e-13	0.416397	0.268	0.225	1.7e-08	CD39lo
Med10	4.21e-15	0.41632	0.288	0.239	1.36e-10	CD39lo
Dnaja2	1.03e-10	0.41585	0.606	0.596	3.33e-06	CD39lo
Kcnn4	2.2e-15	0.415807	0.395	0.35	7.11e-11	CD39lo
Zfp106	1.13e-12	0.415802	0.341	0.299	3.65e-08	CD39lo
Ctsc	3.02e-20	0.415536	0.316	0.257	9.73e-16	CD39lo
Rpl23a	1.82e-15	0.415246	0.952	0.96	5.89e-11	CD39lo
Nup98	8.25e-14	0.415136	0.341	0.294	2.66e-09	CD39lo
Fam133b	1.58e-09	0.415129	0.421	0.394	5.11e-05	CD39lo
Setx	2.25e-22	0.414691	0.45	0.388	7.27e-18	CD39lo
Zfr	1.43e-19	0.414556	0.461	0.411	4.6e-15	CD39lo
Rbm26	3.94e-16	0.414231	0.418	0.369	1.27e-11	CD39lo
Ap1g1	1.57e-15	0.414088	0.28	0.231	5.07e-11	CD39lo
Nptn	5.96e-13	0.413951	0.589	0.574	1.92e-08	CD39lo
AW554918	1.24e-11	0.413607	0.422	0.388	4e-07	CD39lo
Setd2	4.02e-20	0.412923	0.394	0.337	1.3e-15	CD39lo
Tnfaip8	8.08e-19	0.41274	0.593	0.559	2.61e-14	CD39lo
Akirin1	2.56e-11	0.412378	0.305	0.266	8.26e-07	CD39lo
Adam10	5.37e-16	0.412159	0.38	0.333	1.73e-11	CD39lo
Fyco1	3.29e-13	0.411997	0.257	0.213	1.06e-08	CD39lo
Naa15	2.88e-10	0.411684	0.464	0.437	9.3e-06	CD39lo
Rps2	6.72e-08	0.411115	0.972	0.979	0.00216904	CD39lo
Wdr82	3.22e-12	0.410706	0.291	0.249	1.04e-07	CD39lo
Dgkd	1.03e-15	0.410601	0.357	0.31	3.33e-11	CD39lo
Ube3a	6.3e-19	0.410549	0.52	0.47	2.03e-14	CD39lo
Sp140	1.02e-20	0.410445	0.326	0.266	3.3e-16	CD39lo
Med15	5.93e-18	0.410076	0.331	0.276	1.91e-13	CD39lo
Ablim1	5.11e-42	0.41003	0.757	0.703	1.65e-37	CD39lo
Iigp1	2.67e-26	0.409995	0.465	0.379	8.6e-22	CD39lo
Lcor	4e-20	0.409989	0.469	0.414	1.29e-15	CD39lo
Gm39323	3.52e-11	0.409845	0.28	0.241	1.14e-06	CD39lo
Nfkb1	2.19e-18	0.409526	0.73	0.715	7.08e-14	CD39lo
Ppp1r10	9.5e-14	0.409211	0.273	0.227	3.07e-09	CD39lo
Senp5	1.01e-10	0.408876	0.252	0.216	3.25e-06	CD39lo
Chchd3	2.33e-16	0.408654	0.534	0.498	7.52e-12	CD39lo
Glrx5	6.8e-11	0.408376	0.345	0.31	2.2e-06	CD39lo
Ascc3	1.11e-19	0.408187	0.48	0.431	3.59e-15	CD39lo
Efr3a	1.74e-20	0.40745	0.399	0.34	5.61e-16	CD39lo
Ppp1cb	2.93e-16	0.407381	0.502	0.466	9.47e-12	CD39lo
Mplkip	8.56e-14	0.407285	0.291	0.246	2.76e-09	CD39lo
Trappc5	7.65e-12	0.407173	0.25	0.211	2.47e-07	CD39lo
Rftn1	1.57e-14	0.4071	0.314	0.267	5.07e-10	CD39lo
Mau2	3.93e-18	0.406875	0.339	0.284	1.27e-13	CD39lo
Pdss2	5.81e-15	0.406728	0.335	0.287	1.88e-10	CD39lo
Zbtb11	2.1e-12	0.406718	0.411	0.371	6.77e-08	CD39lo
Srek1	1.68e-15	0.406092	0.486	0.446	5.42e-11	CD39lo
Stim1	3.63e-25	0.405689	0.521	0.462	1.17e-20	CD39lo
Arcn1	1.31e-10	0.405647	0.334	0.298	4.23e-06	CD39lo
Smim4	2.28e-13	0.405388	0.258	0.214	7.36e-09	CD39lo
Htt	1.49e-11	0.405282	0.287	0.247	4.81e-07	CD39lo
Sppl3	1.66e-16	0.405189	0.427	0.378	5.37e-12	CD39lo
Eif4enif1	7.93e-09	0.405163	0.329	0.298	0.000256067	CD39lo
Malsu1	5.88e-13	0.405068	0.277	0.235	1.9e-08	CD39lo
Zfp654	9.11e-21	0.404992	0.425	0.367	2.94e-16	CD39lo
Cop1	2.48e-13	0.404744	0.309	0.265	8.02e-09	CD39lo
Mettl16	2.65e-10	0.404544	0.287	0.251	8.55e-06	CD39lo
Mdfic	8.76e-11	0.404541	0.405	0.375	2.83e-06	CD39lo
Acbd3	3.06e-13	0.40445	0.296	0.253	9.87e-09	CD39lo
Pigk	2.09e-11	0.404368	0.257	0.217	6.75e-07	CD39lo
Aifm1	2.2e-10	0.403824	0.266	0.229	7.12e-06	CD39lo
Mpc1	4.52e-08	0.403505	0.382	0.361	0.00145873	CD39lo
Arf4	3.77e-23	0.403477	0.548	0.494	1.22e-18	CD39lo
Glyr1	1.63e-15	0.403108	0.392	0.345	5.26e-11	CD39lo
Dcaf1	1.38e-13	0.403079	0.329	0.285	4.46e-09	CD39lo
Rilpl2	2.74e-10	0.402597	0.281	0.245	8.84e-06	CD39lo
Lsg1	3.04e-13	0.402478	0.266	0.221	9.82e-09	CD39lo
Med13	7.12e-12	0.402195	0.348	0.308	2.3e-07	CD39lo
Rbm27	2.2e-11	0.402029	0.403	0.369	7.09e-07	CD39lo
Stap1	3.28e-15	0.402023	0.335	0.287	1.06e-10	CD39lo
Phkb	5.31e-13	0.401627	0.291	0.248	1.71e-08	CD39lo
Bptf	2.06e-22	0.401292	0.59	0.538	6.65e-18	CD39lo
Rps15a	2.87e-76	0.401275	0.979	0.984	9.25e-72	CD39lo
Usp47	9.74e-16	0.400854	0.392	0.345	3.15e-11	CD39lo
Dhx36	1.06e-16	0.400791	0.402	0.353	3.42e-12	CD39lo
Arid4b	2.51e-28	0.400763	0.603	0.551	8.11e-24	CD39lo
Spop	6.23e-14	0.400761	0.394	0.354	2.01e-09	CD39lo
Map3k1	3.98e-15	0.400405	0.29	0.241	1.29e-10	CD39lo
Trmt6	4.48e-07	0.400167	0.255	0.229	0.0144587	CD39lo
AC149090.1	4.26e-17	0.399903	0.321	0.267	1.38e-12	CD39lo
Txnip	6.85e-30	0.399535	0.514	0.442	2.21e-25	CD39lo
Nt5c2	3.86e-14	0.399403	0.251	0.205	1.24e-09	CD39lo
Mbnl2	1e-26	0.39933	0.498	0.43	3.23e-22	CD39lo
Snx4	1.05e-11	0.399317	0.267	0.227	3.38e-07	CD39lo
Helb	9.52e-10	0.399209	0.265	0.23	3.07e-05	CD39lo
Smad2	2.08e-13	0.398977	0.292	0.247	6.72e-09	CD39lo
Wars	1.61e-11	0.398625	0.256	0.217	5.2e-07	CD39lo
Mknk2	1.31e-11	0.39855	0.307	0.267	4.21e-07	CD39lo
Samm50	2.85e-09	0.398477	0.346	0.316	9.19e-05	CD39lo
Axin1	9.5e-16	0.398461	0.289	0.238	3.07e-11	CD39lo
Sh3kbp1	4.45e-38	0.398296	0.763	0.723	1.44e-33	CD39lo
Vps41	2.79e-14	0.397989	0.297	0.249	9e-10	CD39lo
Stx18	1.22e-12	0.397975	0.25	0.208	3.95e-08	CD39lo
Etnk1	1.3e-19	0.397874	0.38	0.323	4.19e-15	CD39lo
Pafah1b1	9.42e-23	0.397773	0.679	0.652	3.04e-18	CD39lo
Arid4a	3.76e-26	0.397737	0.536	0.472	1.22e-21	CD39lo
Tnfaip8l2	2.85e-13	0.397679	0.265	0.221	9.21e-09	CD39lo
Papola	4.56e-17	0.397652	0.484	0.437	1.47e-12	CD39lo
Tram1	3.96e-15	0.397486	0.4	0.356	1.28e-10	CD39lo
Nfyc	7.17e-13	0.397284	0.369	0.327	2.31e-08	CD39lo
Hira	1.85e-10	0.397157	0.333	0.297	5.97e-06	CD39lo
Smurf2	1.29e-12	0.396981	0.322	0.28	4.15e-08	CD39lo
Sidt1	1.28e-09	0.39681	0.25	0.215	4.14e-05	CD39lo
Dock2	5.27e-36	0.396329	0.894	0.884	1.7e-31	CD39lo
Dlg1	2e-19	0.396164	0.459	0.402	6.45e-15	CD39lo
Ranbp9	1.57e-18	0.395995	0.43	0.376	5.06e-14	CD39lo
Mapk1ip1l	5.62e-17	0.395809	0.407	0.356	1.81e-12	CD39lo
Mcmbp	2.13e-10	0.395765	0.393	0.362	6.87e-06	CD39lo
Uqcrc2	3.41e-16	0.395377	0.466	0.421	1.1e-11	CD39lo
Atg16l1	6.39e-13	0.395355	0.281	0.237	2.06e-08	CD39lo
Atp2a2	2.65e-08	0.39518	0.35	0.321	0.000857118	CD39lo
Slc9a8	1.76e-10	0.395132	0.25	0.213	5.69e-06	CD39lo
Immp2l	4.38e-07	0.39512	0.405	0.386	0.0141335	CD39lo
Atp13a3	6.35e-10	0.39488	0.381	0.349	2.05e-05	CD39lo
Fcf1	5.21e-14	0.394835	0.355	0.312	1.68e-09	CD39lo
Ddx42	5.96e-12	0.394817	0.425	0.391	1.92e-07	CD39lo
Kidins220	3.46e-15	0.394671	0.364	0.315	1.12e-10	CD39lo
Usp16	4.52e-12	0.394234	0.29	0.247	1.46e-07	CD39lo
Gak	1.59e-14	0.394136	0.338	0.291	5.14e-10	CD39lo
Zfp800	6.17e-09	0.394028	0.272	0.24	0.00019931	CD39lo
Ubap2	1.06e-08	0.393972	0.414	0.39	0.000343125	CD39lo
Elovl5	1.36e-12	0.393845	0.251	0.208	4.4e-08	CD39lo
Arglu1	7.49e-17	0.39383	0.512	0.474	2.42e-12	CD39lo
Phf12	1.56e-15	0.393705	0.339	0.289	5.03e-11	CD39lo
Ccdc85b	5.06e-13	0.393681	0.286	0.242	1.63e-08	CD39lo
Opa1	1.63e-10	0.393553	0.262	0.225	5.26e-06	CD39lo
Tmem71	1.39e-13	0.393299	0.284	0.238	4.5e-09	CD39lo
Tbk1	1.9e-16	0.393152	0.301	0.248	6.14e-12	CD39lo
Hdgfl3	2.32e-12	0.393097	0.341	0.3	7.49e-08	CD39lo
mt-Nd4	5.16e-12	0.392992	0.953	0.967	1.67e-07	CD39lo
Clasp2	3.88e-12	0.392816	0.387	0.349	1.25e-07	CD39lo
Pik3cd	4.69e-32	0.392725	0.783	0.755	1.51e-27	CD39lo
Rps14	1.46e-42	0.392686	0.979	0.984	4.71e-38	CD39lo
Ankhd1	4.84e-21	0.392601	0.471	0.414	1.56e-16	CD39lo
Nploc4	5.7e-09	0.392462	0.262	0.229	0.000183885	CD39lo
Vapa	1.76e-10	0.392207	0.463	0.437	5.68e-06	CD39lo
Micu2	3.08e-18	0.392175	0.411	0.357	9.93e-14	CD39lo
Scaf4	1.05e-11	0.392051	0.309	0.269	3.38e-07	CD39lo
Rc3h1	3.69e-13	0.392044	0.386	0.344	1.19e-08	CD39lo
Bnip3l	5.12e-23	0.391467	0.592	0.543	1.65e-18	CD39lo
Zfx	2.67e-12	0.391418	0.314	0.271	8.62e-08	CD39lo
Gimap6	3.15e-46	0.391291	0.679	0.602	1.02e-41	CD39lo
2410006H16Rik	7.53e-32	0.391016	0.637	0.579	2.43e-27	CD39lo
Ube2k	4.08e-15	0.390896	0.556	0.525	1.32e-10	CD39lo
Pkn1	1.6e-20	0.390884	0.42	0.363	5.17e-16	CD39lo
Fam104a	7.19e-13	0.390876	0.429	0.39	2.32e-08	CD39lo
Ylpm1	1.79e-13	0.390868	0.327	0.281	5.77e-09	CD39lo
Ubxn4	2.59e-20	0.390778	0.483	0.428	8.38e-16	CD39lo
Helz	1.03e-21	0.390684	0.445	0.384	3.32e-17	CD39lo
Rest	6.92e-14	0.390632	0.264	0.218	2.23e-09	CD39lo
Eps15	2.27e-12	0.390378	0.251	0.209	7.34e-08	CD39lo
Btg2	1.18e-13	0.390358	0.263	0.217	3.81e-09	CD39lo
Esco1	1.79e-15	0.390257	0.267	0.217	5.76e-11	CD39lo
Ireb2	2.8e-10	0.390208	0.265	0.228	9.03e-06	CD39lo
Nhlrc2	1.44e-13	0.389851	0.276	0.231	4.66e-09	CD39lo
0610012G03Rik	3.64e-14	0.389584	0.41	0.366	1.17e-09	CD39lo
Zzef1	2.2e-17	0.389473	0.378	0.325	7.1e-13	CD39lo
Heatr6	9.79e-13	0.389408	0.269	0.225	3.16e-08	CD39lo
Zfp871	1.39e-13	0.389388	0.273	0.228	4.5e-09	CD39lo
Lamtor2	2.09e-21	0.38928	0.517	0.464	6.74e-17	CD39lo
Plgrkt	1.62e-20	0.389246	0.388	0.327	5.21e-16	CD39lo
Yy1	8.99e-14	0.389242	0.483	0.447	2.9e-09	CD39lo
Ogdh	1.58e-17	0.38916	0.432	0.382	5.09e-13	CD39lo
Cdk2ap2	1.76e-34	0.389094	0.618	0.549	5.67e-30	CD39lo
Zfc3h1	5.49e-14	0.388862	0.331	0.286	1.77e-09	CD39lo
Hnrnph2	1.09e-14	0.388722	0.296	0.247	3.52e-10	CD39lo
Rnf138	9.85e-16	0.388718	0.343	0.294	3.18e-11	CD39lo
Trim12a	3.29e-15	0.38866	0.275	0.226	1.06e-10	CD39lo
Sec63	1.15e-18	0.388591	0.439	0.388	3.73e-14	CD39lo
H2-Q4	5.44e-14	0.388476	0.252	0.206	1.76e-09	CD39lo
Araf	1.09e-12	0.388407	0.254	0.211	3.52e-08	CD39lo
Luc7l2	1.08e-31	0.388392	0.856	0.835	3.49e-27	CD39lo
Ifi35	3.06e-18	0.388123	0.36	0.304	9.89e-14	CD39lo
Gpatch8	4e-24	0.38766	0.591	0.542	1.29e-19	CD39lo
Elmo1	1.43e-15	0.387	0.832	0.833	4.62e-11	CD39lo
Ash2l	8.59e-11	0.38664	0.316	0.279	2.77e-06	CD39lo
Ubr1	4.28e-13	0.3866	0.312	0.267	1.38e-08	CD39lo
R3hcc1l	8.57e-13	0.386364	0.25	0.208	2.77e-08	CD39lo
Eipr1	8.74e-09	0.386309	0.28	0.248	0.000282298	CD39lo
Bdp1	5.88e-10	0.385916	0.297	0.261	1.9e-05	CD39lo
Stag2	3.48e-15	0.385467	0.507	0.469	1.12e-10	CD39lo
Carnmt1	6.16e-07	0.38538	0.299	0.274	0.0198905	CD39lo
Herc2	2.81e-14	0.385315	0.309	0.261	9.09e-10	CD39lo
Comt	8.81e-09	0.385241	0.262	0.229	0.00028451	CD39lo
Mrps14	6.04e-07	0.385067	0.521	0.52	0.0195067	CD39lo
Birc6	7.34e-21	0.385014	0.709	0.686	2.37e-16	CD39lo
AU020206	9.03e-12	0.384932	0.521	0.502	2.91e-07	CD39lo
Rnf169	1.84e-14	0.384875	0.375	0.328	5.95e-10	CD39lo
Nfatc3	1.19e-24	0.384837	0.515	0.452	3.86e-20	CD39lo
Senp1	1.49e-13	0.384671	0.305	0.261	4.8e-09	CD39lo
Rtcb	5.94e-15	0.384645	0.413	0.367	1.92e-10	CD39lo
Raf1	8.31e-10	0.38457	0.285	0.249	2.68e-05	CD39lo
Wac	3.76e-16	0.38456	0.54	0.505	1.21e-11	CD39lo
Osbpl9	5.21e-14	0.384407	0.301	0.254	1.68e-09	CD39lo
Nfx1	1.29e-15	0.384218	0.379	0.33	4.17e-11	CD39lo
Fam114a2	3.65e-13	0.38412	0.28	0.235	1.18e-08	CD39lo
Tex2	4.94e-11	0.384114	0.275	0.236	1.59e-06	CD39lo
Csnk1g1	1.3e-17	0.383914	0.595	0.558	4.19e-13	CD39lo
Ngly1	5.45e-17	0.383576	0.403	0.351	1.76e-12	CD39lo
Setd5	4.56e-16	0.383525	0.556	0.518	1.47e-11	CD39lo
Top1	1.05e-15	0.383473	0.571	0.545	3.39e-11	CD39lo
Imp3	1.61e-12	0.383047	0.445	0.407	5.2e-08	CD39lo
4930523C07Rik	8.5e-22	0.382982	0.485	0.426	2.75e-17	CD39lo
Arl2bp	1.65e-12	0.382891	0.35	0.31	5.33e-08	CD39lo
Ptpn6	3.31e-11	0.382708	0.399	0.365	1.07e-06	CD39lo
Bcl10	2.68e-14	0.382676	0.258	0.211	8.65e-10	CD39lo
Api5	6.22e-08	0.382646	0.348	0.32	0.00200729	CD39lo
Ubap2l	5.77e-12	0.382548	0.563	0.545	1.86e-07	CD39lo
Acsl4	1.8e-08	0.381989	0.35	0.322	0.000582536	CD39lo
Brms1	7.16e-12	0.381971	0.252	0.211	2.31e-07	CD39lo
Ddx46	3.17e-07	0.381744	0.504	0.494	0.0102186	CD39lo
Cul5	4.13e-10	0.381569	0.289	0.253	1.33e-05	CD39lo
Ehmt1	2.88e-12	0.381562	0.33	0.288	9.31e-08	CD39lo
Hnrnpdl	1.51e-07	0.381164	0.496	0.49	0.00487102	CD39lo
Lgals3bp	7.47e-08	0.380834	0.266	0.236	0.00241023	CD39lo
Taok3	1.17e-18	0.380023	0.525	0.48	3.77e-14	CD39lo
Dhx40	1.54e-11	0.379656	0.26	0.219	4.98e-07	CD39lo
Nup153	1.23e-10	0.379251	0.371	0.335	3.98e-06	CD39lo
Snx6	3.74e-13	0.379166	0.438	0.401	1.21e-08	CD39lo
Oga	1.64e-17	0.379127	0.498	0.45	5.31e-13	CD39lo
Ago2	2.63e-15	0.37901	0.47	0.427	8.48e-11	CD39lo
Sar1b	1.28e-10	0.378923	0.338	0.302	4.13e-06	CD39lo
Mettl23	4.43e-17	0.378375	0.371	0.319	1.43e-12	CD39lo
Trappc9	4.67e-13	0.37818	0.34	0.295	1.51e-08	CD39lo
Tox4	1.72e-15	0.377761	0.399	0.351	5.54e-11	CD39lo
Immp1l	6.89e-20	0.377687	0.362	0.3	2.22e-15	CD39lo
Ints6	4.01e-10	0.377496	0.312	0.275	1.29e-05	CD39lo
Man1a2	1.01e-12	0.377485	0.344	0.302	3.26e-08	CD39lo
Rpl9	9.67e-36	0.377361	0.959	0.969	3.12e-31	CD39lo
Wwox	3.84e-09	0.376992	0.488	0.465	0.000124005	CD39lo
Tapbp	2.33e-20	0.376904	0.565	0.517	7.53e-16	CD39lo
Taf3	1.09e-11	0.376759	0.334	0.293	3.53e-07	CD39lo
Traf1	1.99e-24	0.376596	0.515	0.449	6.41e-20	CD39lo
Il4ra	1.95e-09	0.376552	0.265	0.231	6.3e-05	CD39lo
Selenot	3.01e-11	0.376405	0.353	0.316	9.73e-07	CD39lo
Ubtf	3e-08	0.376343	0.415	0.39	0.000969989	CD39lo
Cmtr1	2.31e-10	0.376338	0.261	0.225	7.44e-06	CD39lo
Cd8b1	6.46e-36	0.376289	0.79	0.766	2.09e-31	CD39lo
Map2k4	1.63e-15	0.376093	0.358	0.307	5.26e-11	CD39lo
Rapgef2	1.15e-16	0.376029	0.437	0.387	3.72e-12	CD39lo
Smarca2	1.57e-16	0.375986	0.404	0.353	5.07e-12	CD39lo
Pbxip1	1.84e-16	0.375968	0.286	0.233	5.93e-12	CD39lo
Matr3	1.84e-11	0.375783	0.385	0.348	5.94e-07	CD39lo
Mkln1	1.16e-16	0.375239	0.486	0.441	3.76e-12	CD39lo
Rbm25	3.73e-14	0.375161	0.733	0.732	1.2e-09	CD39lo
Tpp2	1.9e-11	0.375078	0.464	0.435	6.12e-07	CD39lo
Pfkl	5.01e-11	0.374907	0.421	0.39	1.62e-06	CD39lo
Rrp7a	7.79e-10	0.374889	0.256	0.22	2.52e-05	CD39lo
Lsm14a	3.6e-14	0.37487	0.409	0.366	1.16e-09	CD39lo
Thoc2	3.07e-18	0.374867	0.53	0.485	9.91e-14	CD39lo
Zswim6	7.25e-15	0.374772	0.338	0.288	2.34e-10	CD39lo
Hexb	3.25e-12	0.37441	0.27	0.228	1.05e-07	CD39lo
Rasa3	5.28e-07	0.373419	0.264	0.236	0.0170499	CD39lo
Faf2	3.09e-11	0.372893	0.303	0.263	9.98e-07	CD39lo
Scaper	1.4e-11	0.372785	0.387	0.349	4.53e-07	CD39lo
Usp9x	5.01e-15	0.372523	0.419	0.369	1.62e-10	CD39lo
Dnajc13	1.55e-11	0.372448	0.269	0.228	4.99e-07	CD39lo
Dtx3l	2.31e-18	0.372435	0.383	0.326	7.47e-14	CD39lo
Usp34	1.42e-13	0.372266	0.618	0.598	4.58e-09	CD39lo
Prkd2	4.54e-15	0.372116	0.361	0.31	1.47e-10	CD39lo
Wrn	1.07e-13	0.372116	0.366	0.319	3.47e-09	CD39lo
Ncoa7	2.49e-12	0.371932	0.339	0.297	8.05e-08	CD39lo
Atrx	6e-18	0.371576	0.679	0.653	1.94e-13	CD39lo
Hnrnpr	9.63e-08	0.371302	0.473	0.458	0.0031101	CD39lo
Uqcrh	6.38e-39	0.370942	0.851	0.855	2.06e-34	CD39lo
Bclaf1	1.51e-13	0.370855	0.592	0.566	4.89e-09	CD39lo
Pacs1	4.25e-18	0.370755	0.494	0.447	1.37e-13	CD39lo
Btbd7	1.52e-13	0.370486	0.349	0.302	4.91e-09	CD39lo
Mta2	2.98e-10	0.36998	0.283	0.245	9.63e-06	CD39lo
Csnk2a2	2.27e-09	0.369929	0.365	0.333	7.34e-05	CD39lo
Grhpr	5.66e-15	0.369455	0.354	0.304	1.83e-10	CD39lo
Polr2a	1.17e-07	0.3692	0.459	0.443	0.00377176	CD39lo
Map3k5	6.06e-11	0.368962	0.361	0.324	1.96e-06	CD39lo
Col4a3bp	1.76e-12	0.368932	0.371	0.329	5.69e-08	CD39lo
Bloc1s2	1.07e-07	0.368853	0.318	0.289	0.00344131	CD39lo
Dguok	1.23e-19	0.368594	0.376	0.315	3.98e-15	CD39lo
Ddx10	2.44e-10	0.368589	0.377	0.34	7.89e-06	CD39lo
Snrnp200	9.12e-09	0.36852	0.304	0.271	0.000294344	CD39lo
R3hdm2	1.63e-13	0.368326	0.331	0.285	5.27e-09	CD39lo
2210016L21Rik	1.32e-13	0.367971	0.26	0.214	4.27e-09	CD39lo
Trappc8	1.89e-13	0.367968	0.336	0.291	6.09e-09	CD39lo
Sppl2a	1.23e-12	0.367944	0.354	0.311	3.97e-08	CD39lo
Tomm34	1.3e-10	0.367916	0.276	0.238	4.2e-06	CD39lo
Malt1	4.14e-14	0.367801	0.566	0.533	1.34e-09	CD39lo
Casc3	9.46e-10	0.367523	0.262	0.225	3.05e-05	CD39lo
Smyd3	1.2e-17	0.367405	0.682	0.646	3.88e-13	CD39lo
Pcsk7	2.1e-12	0.367218	0.261	0.218	6.76e-08	CD39lo
Pafah1b2	1.47e-07	0.367193	0.254	0.225	0.00474616	CD39lo
Dock11	3.08e-17	0.367005	0.578	0.539	9.94e-13	CD39lo
Mir142hg	8.16e-65	0.366966	0.901	0.878	2.63e-60	CD39lo
Slf1	6.48e-11	0.366706	0.323	0.284	2.09e-06	CD39lo
Tgs1	1.59e-08	0.366663	0.295	0.263	0.000514058	CD39lo
Rspry1	2.3e-10	0.366652	0.261	0.223	7.42e-06	CD39lo
Zfp407	2.77e-08	0.36618	0.398	0.372	0.000895591	CD39lo
Isy1	5.63e-08	0.366049	0.351	0.324	0.00181883	CD39lo
2025-09-01	8.34e-25	0.366	0.701	0.674	2.69e-20	CD39lo
Rsu1	1.19e-08	0.365802	0.281	0.249	0.000383746	CD39lo
Nudt19	1.33e-08	0.365678	0.268	0.235	0.000430716	CD39lo
Exoc2	1.66e-16	0.365649	0.409	0.357	5.37e-12	CD39lo
Trim30a	2.75e-20	0.365641	0.408	0.346	8.87e-16	CD39lo
Uggt1	9.62e-10	0.365081	0.355	0.321	3.11e-05	CD39lo
Hltf	1.45e-11	0.365022	0.281	0.24	4.68e-07	CD39lo
Esf1	1.79e-07	0.364993	0.277	0.248	0.00578628	CD39lo
Qrich1	4.5e-12	0.364705	0.442	0.407	1.45e-07	CD39lo
Morc3	4.65e-11	0.364699	0.264	0.224	1.5e-06	CD39lo
Higd2a	4.35e-13	0.364682	0.332	0.286	1.4e-08	CD39lo
Xpo7	5.28e-10	0.364619	0.425	0.393	1.7e-05	CD39lo
Kif13b	2.42e-09	0.36452	0.268	0.233	7.81e-05	CD39lo
Emc6	1.87e-07	0.364339	0.34	0.315	0.00602225	CD39lo
Cct4	2.82e-07	0.364059	0.616	0.617	0.00911071	CD39lo
Chd8	3.44e-14	0.36378	0.366	0.32	1.11e-09	CD39lo
Exoc3	5.37e-17	0.363728	0.387	0.333	1.73e-12	CD39lo
Krit1	3.53e-16	0.363615	0.454	0.404	1.14e-11	CD39lo
Clip1	8.63e-12	0.363376	0.34	0.299	2.78e-07	CD39lo
Cnot10	8.38e-09	0.363325	0.283	0.25	0.00027065	CD39lo
Limk2	5.39e-14	0.363276	0.311	0.264	1.74e-09	CD39lo
Snw1	1.1e-17	0.363249	0.507	0.46	3.55e-13	CD39lo
Brk1	9.14e-14	0.362985	0.55	0.525	2.95e-09	CD39lo
Bst2	3.61e-09	0.362782	0.521	0.506	0.000116642	CD39lo
Vta1	3.13e-13	0.362304	0.363	0.318	1.01e-08	CD39lo
3830406C13Rik	2.67e-14	0.3623	0.297	0.248	8.62e-10	CD39lo
Sec11a	1.48e-14	0.362154	0.604	0.57	4.79e-10	CD39lo
Dhx8	9.7e-10	0.361863	0.263	0.227	3.13e-05	CD39lo
Rab21	2.92e-14	0.361177	0.435	0.391	9.43e-10	CD39lo
Phf14	8.04e-17	0.360677	0.458	0.406	2.6e-12	CD39lo
Zfp64	1.81e-11	0.360612	0.253	0.212	5.86e-07	CD39lo
Slc6a6	5.74e-11	0.360469	0.309	0.267	1.85e-06	CD39lo
Eml4	1.09e-15	0.360116	0.552	0.514	3.52e-11	CD39lo
Ccnt1	1.63e-15	0.359956	0.383	0.332	5.25e-11	CD39lo
Eif4b	7.23e-08	0.359948	0.545	0.536	0.00233551	CD39lo
Map2k5	1.24e-11	0.359749	0.352	0.311	4.01e-07	CD39lo
N4bp2l2	2.62e-16	0.359575	0.509	0.464	8.46e-12	CD39lo
Prkcq	4.53e-34	0.359571	0.726	0.666	1.46e-29	CD39lo
Arih2	2.27e-10	0.359473	0.358	0.323	7.33e-06	CD39lo
Man2a1	3.66e-10	0.359314	0.331	0.295	1.18e-05	CD39lo
Ddx54	2.19e-10	0.359301	0.292	0.254	7.07e-06	CD39lo
Gng5	6.66e-11	0.35922	0.734	0.737	2.15e-06	CD39lo
Kpna4	1.32e-16	0.358925	0.572	0.537	4.27e-12	CD39lo
Bms1	6.08e-07	0.358595	0.313	0.287	0.0196211	CD39lo
Clk4	6.57e-14	0.358546	0.276	0.229	2.12e-09	CD39lo
Pum2	8.36e-15	0.358363	0.47	0.425	2.7e-10	CD39lo
Nr2c2	4.77e-12	0.358289	0.389	0.347	1.54e-07	CD39lo
Kdm1a	1.35e-10	0.358258	0.363	0.327	4.36e-06	CD39lo
Usp37	7.15e-07	0.358252	0.309	0.283	0.0230856	CD39lo
Vamp4	1.8e-11	0.357546	0.268	0.227	5.81e-07	CD39lo
Csde1	3.77e-16	0.357048	0.6	0.563	1.22e-11	CD39lo
Mms19	4.56e-09	0.356835	0.272	0.237	0.000147333	CD39lo
Cops2	2.6e-09	0.356615	0.306	0.271	8.4e-05	CD39lo
Fam168b	3.06e-16	0.356522	0.333	0.279	9.88e-12	CD39lo
Psenen	8.65e-15	0.35635	0.396	0.349	2.79e-10	CD39lo
Dennd4a	1.48e-38	0.356228	0.855	0.831	4.76e-34	CD39lo
Mecp2	7.68e-14	0.356151	0.347	0.301	2.48e-09	CD39lo
Cnih4	1.15e-06	0.356061	0.337	0.313	0.0372667	CD39lo
Cir1	5.42e-14	0.35572	0.341	0.292	1.75e-09	CD39lo
Klrk1	8.3e-09	0.355703	0.609	0.609	0.00026791	CD39lo
Adipor2	2.53e-08	0.35568	0.302	0.271	0.000817166	CD39lo
AU040320	2.28e-11	0.355667	0.256	0.215	7.35e-07	CD39lo
Rae1	1.1e-07	0.355664	0.293	0.263	0.00354052	CD39lo
Mdm4	5.74e-12	0.355567	0.427	0.389	1.85e-07	CD39lo
Zfp638	5.33e-15	0.355544	0.476	0.434	1.72e-10	CD39lo
Vps13b	1.21e-20	0.355479	0.601	0.55	3.91e-16	CD39lo
Rnf166	2.2e-14	0.355404	0.301	0.252	7.11e-10	CD39lo
Pkn2	3.38e-13	0.355357	0.445	0.405	1.09e-08	CD39lo
Cd2	2.63e-14	0.355228	0.595	0.564	8.49e-10	CD39lo
Gm47283	4.16e-08	0.355019	0.321	0.288	0.00134284	CD39lo
Ndel1	3.08e-11	0.354966	0.259	0.219	9.94e-07	CD39lo
Elmsan1	3.46e-12	0.354555	0.256	0.213	1.12e-07	CD39lo
Eif3m	2.08e-13	0.354304	0.693	0.687	6.71e-09	CD39lo
Fip1l1	9.12e-17	0.354283	0.508	0.463	2.95e-12	CD39lo
Ankfy1	3.04e-08	0.354179	0.275	0.244	0.000981967	CD39lo
Dyrk1a	9.36e-10	0.3539	0.368	0.331	3.02e-05	CD39lo
Tspan14	4.35e-12	0.353891	0.293	0.248	1.4e-07	CD39lo
Prdx6	6.5e-14	0.353687	0.568	0.539	2.1e-09	CD39lo
Atxn1	2.16e-09	0.352817	0.816	0.832	6.99e-05	CD39lo
Cspp1	1.04e-08	0.352812	0.293	0.261	0.000335326	CD39lo
Tpt1	3.16e-38	0.352685	0.978	0.983	1.02e-33	CD39lo
Cd247	2.43e-28	0.352514	0.75	0.709	7.86e-24	CD39lo
Hnrnph3	1.45e-16	0.352219	0.317	0.262	4.68e-12	CD39lo
Ndufa6	5.4e-28	0.352006	0.637	0.59	1.74e-23	CD39lo
Ranbp2	5.52e-14	0.351971	0.454	0.41	1.78e-09	CD39lo
Elp4	2.5e-10	0.351931	0.37	0.336	8.06e-06	CD39lo
Hadhb	1.69e-11	0.351876	0.284	0.242	5.46e-07	CD39lo
Usf2	1.26e-09	0.351694	0.316	0.281	4.06e-05	CD39lo
Bcap29	3.65e-07	0.351356	0.363	0.337	0.0117827	CD39lo
Tecpr1	6.37e-13	0.351181	0.357	0.313	2.06e-08	CD39lo
Rpl11	2.06e-15	0.351076	0.974	0.981	6.65e-11	CD39lo
Ccdc47	2.63e-09	0.351051	0.3	0.266	8.49e-05	CD39lo
2610507B11Rik	9.46e-07	0.351042	0.299	0.273	0.0305353	CD39lo
Tmem164	6.6e-08	0.350919	0.37	0.343	0.0021324	CD39lo
Zranb1	2.15e-10	0.350077	0.257	0.219	6.93e-06	CD39lo
Fcho2	1.04e-10	0.349949	0.336	0.297	3.35e-06	CD39lo
Sde2	3.21e-09	0.349857	0.257	0.222	0.000103589	CD39lo
Thrap3	5.81e-07	0.34955	0.648	0.651	0.0187519	CD39lo
Aak1	3.72e-25	0.349423	0.661	0.611	1.2e-20	CD39lo
Smarce1	7.7e-11	0.349328	0.505	0.477	2.49e-06	CD39lo
Cnot1	2.52e-15	0.349287	0.543	0.504	8.14e-11	CD39lo
Ext2	3.03e-08	0.349116	0.263	0.231	0.000979047	CD39lo
Mnat1	1.11e-10	0.34892	0.341	0.302	3.59e-06	CD39lo
Dnm2	2.85e-18	0.348739	0.521	0.47	9.21e-14	CD39lo
Pitpnb	1.69e-08	0.348437	0.323	0.291	0.000544642	CD39lo
Dad1	8.03e-10	0.348423	0.652	0.65	2.59e-05	CD39lo
Tprgl	1.14e-14	0.348423	0.35	0.302	3.69e-10	CD39lo
Cul1	4e-10	0.347762	0.378	0.342	1.29e-05	CD39lo
Mark2	1.3e-12	0.347617	0.425	0.384	4.2e-08	CD39lo
Arap2	3.44e-08	0.347278	0.421	0.395	0.0011091	CD39lo
Mysm1	4.11e-15	0.347187	0.341	0.289	1.33e-10	CD39lo
Pdzd8	3.29e-09	0.346965	0.283	0.247	0.000106086	CD39lo
Asxl1	1.2e-08	0.346122	0.491	0.466	0.000386494	CD39lo
Iqgap1	1.84e-09	0.346064	0.666	0.67	5.96e-05	CD39lo
Usp7	6.94e-08	0.345925	0.347	0.319	0.0022397	CD39lo
Arhgap45	6.87e-29	0.345824	0.607	0.544	2.22e-24	CD39lo
Tmem126a	9.17e-11	0.345689	0.317	0.278	2.96e-06	CD39lo
Rnf114	3.76e-11	0.34537	0.293	0.253	1.21e-06	CD39lo
Glg1	3.63e-13	0.345285	0.497	0.461	1.17e-08	CD39lo
Rps23	7.35e-14	0.345277	0.963	0.972	2.37e-09	CD39lo
AW112010	4.16e-20	0.345162	0.927	0.929	1.34e-15	CD39lo
Fam193a	2.38e-10	0.34477	0.376	0.34	7.69e-06	CD39lo
Appl1	7.05e-11	0.344704	0.414	0.38	2.28e-06	CD39lo
Tex261	8.78e-10	0.344689	0.381	0.347	2.83e-05	CD39lo
Ncoa6	9.18e-09	0.344332	0.256	0.222	0.000296242	CD39lo
Ppm1b	8.44e-12	0.344309	0.371	0.33	2.73e-07	CD39lo
Bod1l	2.9e-16	0.344143	0.47	0.419	9.36e-12	CD39lo
Twf2	7.28e-13	0.343774	0.341	0.296	2.35e-08	CD39lo
Btbd9	6.53e-14	0.3436	0.49	0.447	2.11e-09	CD39lo
Mri1	1.19e-11	0.342848	0.306	0.263	3.83e-07	CD39lo
Creb1	5.42e-11	0.342651	0.404	0.365	1.75e-06	CD39lo
Upf2	5.55e-10	0.342461	0.337	0.301	1.79e-05	CD39lo
Twistnb	2.34e-08	0.342402	0.321	0.29	0.000756851	CD39lo
Jarid2	9.34e-15	0.34228	0.46	0.407	3.01e-10	CD39lo
Abi1	2.07e-15	0.341956	0.48	0.434	6.69e-11	CD39lo
Pik3ca	2.05e-12	0.341679	0.331	0.287	6.62e-08	CD39lo
2025-03-05	3.54e-10	0.341545	0.309	0.271	1.14e-05	CD39lo
Ccnd2	3.11e-13	0.341449	0.71	0.691	1e-08	CD39lo
Psph	4.02e-07	0.341273	0.295	0.267	0.0129911	CD39lo
Ncbp3	3.19e-08	0.341025	0.327	0.297	0.00102882	CD39lo
Cep350	5.4e-14	0.340969	0.402	0.354	1.74e-09	CD39lo
Ubr4	1.75e-10	0.3408	0.313	0.275	5.64e-06	CD39lo
Ndfip1	1.72e-19	0.340713	0.759	0.739	5.56e-15	CD39lo
Slc50a1	7.61e-13	0.340711	0.287	0.241	2.46e-08	CD39lo
Akr1b3	2.47e-07	0.339984	0.428	0.407	0.00797154	CD39lo
Celf2	2.93e-22	0.339936	0.867	0.859	9.45e-18	CD39lo
Arid1a	9.22e-10	0.339746	0.475	0.448	2.98e-05	CD39lo
Rngtt	1.07e-12	0.339537	0.532	0.501	3.46e-08	CD39lo
Fam13b	8.64e-12	0.339523	0.31	0.266	2.79e-07	CD39lo
Katnbl1	1.27e-07	0.338915	0.256	0.226	0.00410727	CD39lo
Rps16	4.6e-25	0.338653	0.977	0.983	1.49e-20	CD39lo
Elf2	4.82e-10	0.338222	0.376	0.34	1.56e-05	CD39lo
Trmt112	2.78e-21	0.337877	0.644	0.603	8.96e-17	CD39lo
Emsy	1.3e-07	0.337858	0.292	0.262	0.00420484	CD39lo
Ptpn22	2.88e-20	0.337326	0.667	0.625	9.29e-16	CD39lo
Hscb	1.54e-10	0.3373	0.252	0.213	4.97e-06	CD39lo
Ppil4	5.31e-09	0.337175	0.342	0.31	0.000171291	CD39lo
Wapl	1.47e-09	0.336991	0.561	0.544	4.75e-05	CD39lo
Nktr	1.11e-14	0.336942	0.652	0.632	3.57e-10	CD39lo
Mrpl32	7.96e-08	0.336907	0.291	0.259	0.00257028	CD39lo
Maf1	1.95e-12	0.336866	0.287	0.242	6.3e-08	CD39lo
Tia1	9.49e-11	0.336796	0.271	0.231	3.06e-06	CD39lo
Mindy2	2.93e-13	0.33648	0.331	0.284	9.47e-09	CD39lo
Bbx	6.3e-12	0.336367	0.495	0.46	2.03e-07	CD39lo
Sqstm1	1.35e-18	0.335803	0.49	0.435	4.35e-14	CD39lo
Herc3	1.57e-10	0.335736	0.314	0.275	5.06e-06	CD39lo
Kmt2e	1.11e-21	0.335519	0.637	0.592	3.6e-17	CD39lo
Cwf19l2	1.13e-10	0.335415	0.327	0.288	3.65e-06	CD39lo
Anapc16	1.7e-09	0.335406	0.269	0.233	5.48e-05	CD39lo
Clasp1	2.03e-07	0.335342	0.34	0.313	0.00654004	CD39lo
P4ha1	2.26e-11	0.335335	0.5	0.47	7.28e-07	CD39lo
Cds2	1.59e-08	0.335278	0.265	0.231	0.00051304	CD39lo
Wtap	1.06e-08	0.335089	0.284	0.251	0.000342525	CD39lo
Rpl27a	3.94e-19	0.334892	0.985	0.989	1.27e-14	CD39lo
Rpl10	5.93e-11	0.334866	0.929	0.945	1.91e-06	CD39lo
Ppp6r3	4.43e-11	0.334725	0.397	0.359	1.43e-06	CD39lo
Atxn10	1.65e-11	0.334239	0.409	0.369	5.34e-07	CD39lo
Phip	5.64e-13	0.334146	0.49	0.452	1.82e-08	CD39lo
Gbp4	1.76e-09	0.334117	0.42	0.388	5.68e-05	CD39lo
Psap	5.48e-15	0.333093	0.453	0.406	1.77e-10	CD39lo
Rbbp6	1.47e-13	0.332611	0.472	0.431	4.74e-09	CD39lo
Pdk3	9.05e-08	0.332571	0.29	0.26	0.00292162	CD39lo
Ppp3cb	7.81e-11	0.332281	0.387	0.349	2.52e-06	CD39lo
Ddx17	2.89e-15	0.332253	0.444	0.392	9.34e-11	CD39lo
Hectd1	1.03e-17	0.33194	0.628	0.595	3.32e-13	CD39lo
Picalm	3.65e-09	0.331755	0.48	0.451	0.000117943	CD39lo
Dcaf7	6.43e-08	0.331455	0.258	0.227	0.00207711	CD39lo
Scarb2	1.38e-09	0.331408	0.273	0.236	4.46e-05	CD39lo
Pcm1	2.81e-11	0.331182	0.424	0.386	9.08e-07	CD39lo
Pgm1	4.24e-10	0.330953	0.405	0.369	1.37e-05	CD39lo
Ube2d2a	6.5e-09	0.330841	0.578	0.567	0.000210009	CD39lo
Cers5	2.76e-11	0.330769	0.39	0.35	8.91e-07	CD39lo
Phax	1.82e-09	0.330638	0.309	0.273	5.87e-05	CD39lo
Galk2	2.87e-08	0.330638	0.325	0.292	0.000926421	CD39lo
Zmynd11	7.8e-15	0.330404	0.418	0.366	2.52e-10	CD39lo
Prr14l	1.86e-13	0.330317	0.434	0.39	6.02e-09	CD39lo
Skap1	8.01e-42	0.330302	0.96	0.963	2.59e-37	CD39lo
Mat2b	2.3e-14	0.330037	0.343	0.292	7.44e-10	CD39lo
Tiprl	1.05e-09	0.329415	0.297	0.26	3.37e-05	CD39lo
Chic2	2.66e-14	0.32928	0.412	0.365	8.6e-10	CD39lo
Arhgef6	2.77e-14	0.329167	0.464	0.419	8.94e-10	CD39lo
Cdc26	1.96e-09	0.329019	0.32	0.284	6.34e-05	CD39lo
Fam120a	1.27e-06	0.328755	0.414	0.392	0.0411626	CD39lo
Rps7	4.72e-29	0.328379	0.97	0.976	1.52e-24	CD39lo
Slu7	1.21e-10	0.328317	0.321	0.281	3.91e-06	CD39lo
Terf2	1.49e-08	0.328148	0.257	0.222	0.000480602	CD39lo
Agpat3	7.71e-07	0.328084	0.311	0.283	0.0248928	CD39lo
Nfu1	7.83e-08	0.327741	0.269	0.237	0.00252669	CD39lo
Prpf6	3.57e-10	0.327459	0.31	0.271	1.15e-05	CD39lo
Senp2	2.3e-13	0.327404	0.371	0.322	7.44e-09	CD39lo
Rab2a	5.13e-13	0.327401	0.733	0.729	1.66e-08	CD39lo
Rbl2	3.26e-09	0.327183	0.322	0.288	0.000105305	CD39lo
Uhrf2	3.69e-10	0.326808	0.343	0.304	1.19e-05	CD39lo
Map2k1	7.68e-11	0.326752	0.372	0.333	2.48e-06	CD39lo
Copa	1.34e-09	0.326433	0.423	0.393	4.33e-05	CD39lo
Spata6	4.23e-11	0.326268	0.326	0.284	1.37e-06	CD39lo
Vps13d	4.82e-10	0.325835	0.306	0.267	1.56e-05	CD39lo
Ccz1	6.06e-10	0.32558	0.345	0.308	1.96e-05	CD39lo
Csnk1g3	1.54e-10	0.325503	0.375	0.336	4.97e-06	CD39lo
Alg5	2.63e-07	0.325328	0.292	0.262	0.00849382	CD39lo
Rock2	4.04e-07	0.325323	0.424	0.401	0.0130411	CD39lo
Il2rg	6.59e-25	0.325287	0.663	0.611	2.13e-20	CD39lo
Eif2s3y	5.01e-14	0.324876	0.398	0.35	1.62e-09	CD39lo
AA467197	2.19e-31	0.324871	0.415	0.548	7.06e-27	CD39lo
Polr3c	8.65e-10	0.324775	0.31	0.272	2.79e-05	CD39lo
Med14	2.18e-08	0.324306	0.31	0.278	0.000703792	CD39lo
Gtf2h1	1.98e-08	0.324123	0.295	0.261	0.000638658	CD39lo
Sbno1	2.35e-08	0.324118	0.446	0.422	0.000757955	CD39lo
Arl8b	6.71e-07	0.324082	0.263	0.236	0.0216652	CD39lo
Zdhhc3	4.62e-09	0.32391	0.296	0.261	0.000149146	CD39lo
Tra2a	1.55e-16	0.323863	0.56	0.519	5.02e-12	CD39lo
Vps4b	6.91e-14	0.323786	0.427	0.382	2.23e-09	CD39lo
Rnf6	1.4e-11	0.323729	0.284	0.241	4.5e-07	CD39lo
Nmi	2.94e-12	0.323712	0.373	0.33	9.48e-08	CD39lo
Ubxn2a	4.52e-08	0.323684	0.281	0.248	0.00145883	CD39lo
Ap3b1	2.77e-12	0.323666	0.489	0.452	8.93e-08	CD39lo
Gnai3	1.69e-08	0.323243	0.428	0.399	0.000544468	CD39lo
Dtnb	1.32e-06	0.322723	0.351	0.327	0.042734	CD39lo
Acbd6	1.26e-11	0.322556	0.46	0.422	4.08e-07	CD39lo
Mbd2	5.9e-12	0.321497	0.669	0.653	1.9e-07	CD39lo
Golgb1	1.7e-08	0.321165	0.334	0.301	0.000548756	CD39lo
Ccnl2	2.3e-08	0.320908	0.413	0.387	0.000742245	CD39lo
Jmjd6	1.27e-06	0.320862	0.273	0.246	0.041137	CD39lo
Senp6	5.91e-15	0.320771	0.513	0.466	1.91e-10	CD39lo
Hspbp1	8.08e-08	0.320764	0.302	0.271	0.00261024	CD39lo
Sun2	4.62e-11	0.320728	0.284	0.242	1.49e-06	CD39lo
Rab22a	4.01e-09	0.320404	0.274	0.238	0.000129407	CD39lo
Zfp622	5.79e-08	0.320385	0.269	0.237	0.00186877	CD39lo
Zmat5	1.95e-09	0.320038	0.254	0.217	6.3e-05	CD39lo
Mycbp2	3.73e-17	0.320022	0.728	0.702	1.2e-12	CD39lo
Sap130	1.08e-08	0.319625	0.269	0.233	0.000348315	CD39lo
Rad54l2	2.05e-07	0.318961	0.295	0.265	0.0066057	CD39lo
Chtop	8.01e-07	0.318613	0.31	0.282	0.0258544	CD39lo
Ttc7b	1.49e-07	0.318567	0.27	0.239	0.00482528	CD39lo
Eapp	2.71e-10	0.318429	0.335	0.296	8.76e-06	CD39lo
Plcl2	1.43e-10	0.318345	0.539	0.514	4.62e-06	CD39lo
Sdf4	4.31e-14	0.318296	0.628	0.603	1.39e-09	CD39lo
Tmem165	1.9e-08	0.317824	0.298	0.264	0.000612579	CD39lo
Thoc1	4.93e-08	0.317771	0.375	0.346	0.00159047	CD39lo
Rbm10	7.27e-07	0.316751	0.27	0.242	0.0234805	CD39lo
Xrn1	6.23e-13	0.315929	0.453	0.409	2.01e-08	CD39lo
Phc2	1.19e-11	0.315744	0.337	0.293	3.83e-07	CD39lo
Rlf	3.47e-18	0.315729	0.554	0.504	1.12e-13	CD39lo
Svbp	6.6e-10	0.31571	0.253	0.215	2.13e-05	CD39lo
Ggnbp2	1.89e-15	0.315688	0.627	0.596	6.09e-11	CD39lo
Ube2b	7.49e-13	0.315686	0.584	0.557	2.42e-08	CD39lo
Ganab	2.12e-07	0.31565	0.254	0.223	0.00685334	CD39lo
Rps18	2.59e-11	0.315602	0.971	0.978	8.36e-07	CD39lo
Arid5a	8.49e-07	0.315569	0.285	0.257	0.0274002	CD39lo
H2-T23	3.55e-14	0.315421	0.438	0.392	1.15e-09	CD39lo
Macf1	6.47e-15	0.315029	0.704	0.679	2.09e-10	CD39lo
Klhl6	7.24e-09	0.314987	0.363	0.33	0.000233851	CD39lo
Ikzf1	5.74e-21	0.314839	0.814	0.804	1.85e-16	CD39lo
Plaa	6.87e-07	0.314732	0.386	0.361	0.0221875	CD39lo
Rpl18	1.75e-17	0.314705	0.975	0.98	5.65e-13	CD39lo
Gimap5	2.74e-16	0.314369	0.41	0.355	8.85e-12	CD39lo
Pak1ip1	1.2e-07	0.314346	0.349	0.319	0.00388505	CD39lo
Ppp2r5a	1.67e-11	0.314259	0.448	0.411	5.39e-07	CD39lo
Pdcd6	6.6e-10	0.314185	0.447	0.413	2.13e-05	CD39lo
Fgf13	1.55e-07	0.314116	0.392	0.362	0.0050115	CD39lo
Tmx3	7.25e-08	0.313743	0.259	0.228	0.00233997	CD39lo
Sltm	1.15e-08	0.313557	0.527	0.504	0.000371816	CD39lo
Rsrc2	8.84e-13	0.313431	0.644	0.619	2.86e-08	CD39lo
Cd53	6.87e-15	0.313424	0.661	0.635	2.22e-10	CD39lo
Golph3	6.97e-07	0.313212	0.253	0.225	0.0225177	CD39lo
Rabep1	9.45e-07	0.312756	0.374	0.35	0.0305139	CD39lo
Uqcc3	5.43e-08	0.312179	0.343	0.313	0.00175362	CD39lo
Fam49b	4.46e-07	0.311764	0.781	0.796	0.0143944	CD39lo
Ppil2	5.21e-11	0.311359	0.335	0.293	1.68e-06	CD39lo
Rps13	1.35e-15	0.311253	0.971	0.979	4.35e-11	CD39lo
Ufd1	3.91e-08	0.311012	0.263	0.23	0.00126165	CD39lo
Hk1	2.14e-07	0.310648	0.481	0.463	0.00690254	CD39lo
4921524J17Rik	8.04e-10	0.310643	0.257	0.219	2.6e-05	CD39lo
Tgoln1	2.28e-08	0.31058	0.269	0.234	0.000737034	CD39lo
Herc1	2.52e-12	0.310155	0.481	0.442	8.14e-08	CD39lo
Rbm5	6.43e-12	0.309754	0.483	0.445	2.08e-07	CD39lo
BC005624	5.69e-10	0.309699	0.29	0.25	1.84e-05	CD39lo
Hsp90aa1	3.21e-15	0.309575	0.73	0.813	1.04e-10	CD39lo
Slc10a7	6.49e-08	0.309573	0.403	0.375	0.00209407	CD39lo
Gm17018	7.42e-08	0.309203	0.334	0.305	0.00239457	CD39lo
Lims1	2.86e-08	0.308897	0.54	0.524	0.000924751	CD39lo
Ngdn	3.56e-08	0.308296	0.284	0.251	0.00114993	CD39lo
Idh3b	8.7e-10	0.308228	0.319	0.281	2.81e-05	CD39lo
Atxn7l3b	3.3e-10	0.307901	0.353	0.313	1.07e-05	CD39lo
Ppp2r5e	9.81e-09	0.307894	0.368	0.334	0.000316756	CD39lo
Kcmf1	6.31e-09	0.307887	0.437	0.409	0.000203566	CD39lo
Acap2	3.65e-09	0.307823	0.354	0.319	0.000117756	CD39lo
Ndufv2	2.12e-07	0.307689	0.465	0.447	0.00683176	CD39lo
Pitpnc1	9.75e-25	0.307587	0.884	0.866	3.15e-20	CD39lo
Riok3	2.52e-08	0.307474	0.354	0.323	0.000815159	CD39lo
Frmd8	6.23e-08	0.306999	0.312	0.28	0.00201099	CD39lo
Prpf8	5.7e-08	0.306801	0.356	0.326	0.00183941	CD39lo
Aamp	6.09e-08	0.306567	0.321	0.289	0.00196664	CD39lo
Rpl12	3.59e-08	0.306452	0.965	0.974	0.00115957	CD39lo
2025-03-02	2.86e-12	0.305831	0.378	0.333	9.23e-08	CD39lo
H3f3a	5.28e-11	0.30567	0.879	0.878	1.7e-06	CD39lo
Itsn2	4.38e-11	0.305669	0.48	0.443	1.41e-06	CD39lo
Trip11	2.4e-13	0.305447	0.416	0.366	7.75e-09	CD39lo
Tnrc6a	2.47e-08	0.304297	0.447	0.418	0.000798676	CD39lo
Cpsf6	2.3e-09	0.304052	0.455	0.427	7.41e-05	CD39lo
Srsf11	6.5e-07	0.30405	0.66	0.661	0.0209855	CD39lo
Jtb	1.58e-07	0.303953	0.265	0.233	0.00509348	CD39lo
Arhgap17	2.08e-07	0.303895	0.253	0.222	0.00672613	CD39lo
Cstf3	8.22e-08	0.303734	0.411	0.383	0.0026545	CD39lo
Sfswap	8.73e-08	0.303703	0.342	0.311	0.00281765	CD39lo
Cmip	8.7e-10	0.303624	0.654	0.643	2.81e-05	CD39lo
Psmg4	1.61e-07	0.303152	0.416	0.393	0.0052099	CD39lo
Rnf4	4.53e-08	0.302966	0.401	0.373	0.00146396	CD39lo
Atp6v1d	7.24e-11	0.302425	0.386	0.347	2.34e-06	CD39lo
Ostf1	4.33e-07	0.302221	0.664	0.664	0.0139903	CD39lo
Tmem234	2.24e-15	0.302089	0.565	0.524	7.24e-11	CD39lo
Erap1	1.24e-08	0.301608	0.317	0.283	0.000399642	CD39lo
Cdk11b	5.18e-11	0.30141	0.487	0.454	1.67e-06	CD39lo
Oxa1l	1.89e-10	0.301061	0.308	0.268	6.12e-06	CD39lo
Mapk1	1.51e-13	0.301001	0.541	0.504	4.89e-09	CD39lo
Pi4ka	1.17e-08	0.300695	0.319	0.284	0.00037728	CD39lo
Rps27rt	2.37e-10	0.30012	0.313	0.274	7.64e-06	CD39lo
Ddx5	5.49e-19	0.299465	0.924	0.925	1.77e-14	CD39lo
Ddx50	2.22e-11	0.299389	0.397	0.358	7.16e-07	CD39lo
Stx5a	6.25e-08	0.298496	0.262	0.229	0.00201849	CD39lo
Supt20	3.28e-09	0.298337	0.346	0.31	0.000106029	CD39lo
Brd7	1.23e-07	0.298264	0.365	0.337	0.00397309	CD39lo
Ppp1r12a	3.14e-17	0.297877	0.745	0.721	1.01e-12	CD39lo
Mkrn1	4.04e-07	0.297861	0.381	0.356	0.0130432	CD39lo
Dnttip1	2.1e-08	0.297321	0.258	0.224	0.000678886	CD39lo
Gmfg	5.74e-07	0.296713	0.73	0.745	0.0185349	CD39lo
Pip4k2a	3.89e-08	0.296704	0.501	0.479	0.00125654	CD39lo
Lamp1	1.96e-08	0.296119	0.446	0.42	0.000631629	CD39lo
Kat6a	3.19e-10	0.295673	0.391	0.353	1.03e-05	CD39lo
Sat1	8.32e-13	0.295666	0.263	0.218	2.69e-08	CD39lo
Add1	2.41e-09	0.295361	0.451	0.418	7.78e-05	CD39lo
Srcap	5.93e-08	0.295324	0.312	0.28	0.00191369	CD39lo
Xrn2	4.93e-09	0.294921	0.625	0.617	0.000159249	CD39lo
Dctn6	1.17e-06	0.29339	0.274	0.247	0.0376952	CD39lo
Zfand6	5.54e-08	0.292679	0.544	0.527	0.00178703	CD39lo
Atf7ip	5.88e-09	0.292636	0.297	0.26	0.000189848	CD39lo
Wipf1	6.34e-19	0.292623	0.637	0.593	2.05e-14	CD39lo
Snx20	2.57e-07	0.292142	0.27	0.239	0.00831194	CD39lo
Ythdc1	2.35e-13	0.292046	0.658	0.634	7.59e-09	CD39lo
Rpl27	1.7e-12	0.291423	0.973	0.979	5.49e-08	CD39lo
Tmem50a	8.02e-13	0.291228	0.534	0.499	2.59e-08	CD39lo
Rbm39	3.55e-18	0.291097	0.936	0.939	1.15e-13	CD39lo
Tent2	1.14e-07	0.290949	0.347	0.315	0.00368376	CD39lo
Safb2	1.21e-07	0.290599	0.365	0.336	0.00391108	CD39lo
Ccdc174	3.26e-08	0.290428	0.285	0.251	0.00105135	CD39lo
Tut7	1.22e-11	0.290162	0.426	0.383	3.93e-07	CD39lo
Mettl9	1.53e-06	0.289644	0.329	0.303	0.0492874	CD39lo
Eci2	4.43e-07	0.289514	0.26	0.23	0.0142917	CD39lo
Mdp1	1.86e-07	0.289475	0.306	0.275	0.00598931	CD39lo
Rps24	9.07e-39	0.289275	0.972	0.978	2.93e-34	CD39lo
Ncor1	2e-13	0.289184	0.732	0.713	6.47e-09	CD39lo
Golga4	7.44e-09	0.288851	0.272	0.235	0.000240177	CD39lo
Eif5a	2.9e-11	0.288621	0.793	0.856	9.35e-07	CD39lo
Rpl17	1.28e-17	0.288517	0.962	0.972	4.12e-13	CD39lo
Gsk3b	4.24e-07	0.287916	0.563	0.555	0.0136748	CD39lo
Scamp3	6.54e-07	0.287602	0.257	0.228	0.0210999	CD39lo
Tor1aip1	3.88e-12	0.286181	0.483	0.443	1.25e-07	CD39lo
Ppp2r5c	2.88e-12	0.286089	0.541	0.507	9.31e-08	CD39lo
Wdr70	6.54e-07	0.285065	0.328	0.299	0.0211242	CD39lo
Cbll1	1.81e-08	0.284666	0.274	0.239	0.000582882	CD39lo
Ddx24	5.51e-08	0.284537	0.608	0.595	0.00178038	CD39lo
Nsmce2	6.17e-07	0.284022	0.526	0.508	0.0199343	CD39lo
Atg3	4.59e-07	0.28358	0.342	0.312	0.0148209	CD39lo
Chrac1	1.17e-06	0.28336	0.347	0.32	0.0377065	CD39lo
Apbb1ip	2.22e-16	0.282504	0.674	0.64	7.18e-12	CD39lo
mt-Co1	5.19e-13	0.281843	0.994	0.996	1.67e-08	CD39lo
Rnf20	3.31e-07	0.2816	0.302	0.271	0.0106788	CD39lo
Vps35l	3.85e-08	0.28158	0.253	0.219	0.00124164	CD39lo
Wasf2	3.65e-08	0.281431	0.552	0.533	0.00117727	CD39lo
Ep400	8.8e-08	0.28142	0.524	0.504	0.00284144	CD39lo
Mcl1	3.28e-16	0.281232	0.586	0.541	1.06e-11	CD39lo
Nfat5	1.15e-08	0.28108	0.436	0.402	0.000370859	CD39lo
Lypla1	9.16e-07	0.280176	0.254	0.225	0.0295861	CD39lo
Nin	4.34e-07	0.27926	0.32	0.29	0.0140002	CD39lo
Apobec3	3.39e-14	0.279152	0.678	0.648	1.09e-09	CD39lo
Rtf2	1.05e-06	0.279001	0.402	0.378	0.0338001	CD39lo
Cbx4	1.09e-07	0.278456	0.318	0.286	0.00352854	CD39lo
Brd4	6.57e-08	0.278412	0.634	0.619	0.00212124	CD39lo
Rpl30	9.13e-19	0.277625	0.977	0.984	2.95e-14	CD39lo
Sp100	9.8e-23	0.277396	0.722	0.682	3.16e-18	CD39lo
Fam192a	1.32e-06	0.27717	0.266	0.236	0.0427012	CD39lo
Shoc2	3.79e-07	0.276858	0.284	0.252	0.0122418	CD39lo
Virma	5.21e-08	0.276856	0.398	0.366	0.00168075	CD39lo
Fli1	5.77e-07	0.276029	0.759	0.76	0.0186417	CD39lo
Rps27l	9.76e-22	0.275501	0.674	0.789	3.15e-17	CD39lo
Zc3h7a	1.54e-06	0.274674	0.376	0.349	0.049807	CD39lo
Sec62	4.49e-10	0.2742	0.545	0.517	1.45e-05	CD39lo
Sri	9.71e-08	0.274143	0.673	0.673	0.00313421	CD39lo
Resf1	1.93e-07	0.273979	0.399	0.371	0.00621973	CD39lo
Tnks2	8.29e-07	0.273583	0.552	0.538	0.0267512	CD39lo
Slc3a2	8.78e-08	0.27335	0.441	0.412	0.00283623	CD39lo
4932438A13Rik	1.62e-10	0.273221	0.481	0.443	5.25e-06	CD39lo
Esyt2	2.02e-10	0.273108	0.616	0.588	6.51e-06	CD39lo
Git2	1.32e-08	0.272746	0.428	0.394	0.000425818	CD39lo
Ubn1	8.87e-07	0.272406	0.432	0.408	0.0286529	CD39lo
Ppp4r3a	1.26e-06	0.272291	0.379	0.35	0.0405638	CD39lo
Man2b1	4.24e-07	0.272047	0.294	0.263	0.0136777	CD39lo
Lnpep	5.31e-09	0.27153	0.617	0.596	0.000171399	CD39lo
B230219D22Rik	7.73e-07	0.271396	0.392	0.364	0.0249448	CD39lo
Rps11	1.07e-12	0.271114	0.974	0.983	3.47e-08	CD39lo
Suclg1	1.4e-06	0.270904	0.373	0.349	0.0450392	CD39lo
Vmp1	2.94e-07	0.270482	0.524	0.504	0.0094998	CD39lo
Syf2	1.46e-08	0.270465	0.465	0.437	0.000470699	CD39lo
Rgs10	1.3e-07	0.270183	0.315	0.281	0.00419771	CD39lo
Usp25	1.82e-09	0.269288	0.475	0.439	5.88e-05	CD39lo
Gimap9	5.06e-09	0.269017	0.393	0.359	0.000163413	CD39lo
Mob2	7.25e-09	0.268159	0.309	0.272	0.000234069	CD39lo
Fbxw2	1.95e-09	0.267711	0.411	0.374	6.28e-05	CD39lo
Ptpn2	1.52e-07	0.267649	0.46	0.435	0.00492284	CD39lo
Pdcd10	1.13e-06	0.267638	0.555	0.544	0.0364535	CD39lo
Pde7a	2.55e-10	0.267623	0.567	0.537	8.23e-06	CD39lo
Rsrc1	3.79e-09	0.267451	0.611	0.59	0.000122498	CD39lo
Rchy1	5.13e-07	0.26734	0.276	0.244	0.0165578	CD39lo
Epsti1	9.37e-19	0.266666	0.87	0.887	3.03e-14	CD39lo
Naa20	2.91e-09	0.266153	0.4	0.364	9.41e-05	CD39lo
Ankrd44	1.55e-08	0.265706	0.86	0.863	0.000500596	CD39lo
Cyth4	1.01e-07	0.26547	0.301	0.268	0.00324608	CD39lo
Sdf2	7.28e-07	0.264911	0.271	0.24	0.0235128	CD39lo
Rplp2	5.52e-08	0.264622	0.973	0.983	0.00178262	CD39lo
Hnrnpab	1.17e-16	0.263756	0.601	0.709	3.79e-12	CD39lo
Atp6v1f	3.34e-07	0.263101	0.573	0.562	0.0107833	CD39lo
Psme1	6.88e-11	0.262594	0.82	0.828	2.22e-06	CD39lo
Gabarapl2	3e-09	0.262509	0.508	0.48	9.67e-05	CD39lo
Rnf115	1.54e-06	0.262047	0.368	0.34	0.0497567	CD39lo
Kxd1	1.81e-09	0.261881	0.403	0.366	5.85e-05	CD39lo
Rab11b	8.24e-10	0.26137	0.421	0.381	2.66e-05	CD39lo
Fam32a	1.71e-07	0.261109	0.338	0.306	0.00553411	CD39lo
Rpl18a	5.24e-12	0.260989	0.972	0.982	1.69e-07	CD39lo
Tmod3	4.61e-08	0.260139	0.452	0.425	0.00148982	CD39lo
Sys1	1.31e-09	0.259791	0.469	0.434	4.23e-05	CD39lo
Ankrd11	3.09e-12	0.257147	0.824	0.825	9.96e-08	CD39lo
Pias1	1.83e-09	0.256978	0.446	0.41	5.92e-05	CD39lo
Ptp4a2	4.4e-10	0.255303	0.715	0.702	1.42e-05	CD39lo
Mrpl24	8.62e-09	0.25255	0.363	0.326	0.000278267	CD39lo
Trbc1	5.41e-13	0.251024	0.765	0.743	1.75e-08	CD39lo
Slc44a2	1.29e-07	0.250709	0.354	0.32	0.00417374	CD39lo
Rpa3	4.03e-15	-0.251744	0.234	0.291	1.3e-10	CD39lo
Hip1	1.48e-37	-0.252131	0.341	0.451	4.77e-33	CD39lo
Klrd1	1.32e-46	-0.25485	0.637	0.74	4.25e-42	CD39lo
Neil3	2.2e-45	-0.256578	0.232	0.346	7.11e-41	CD39lo
Soat1	1.1e-12	-0.258216	0.223	0.271	3.54e-08	CD39lo
Hmgcs1	2.99e-24	-0.25909	0.269	0.344	9.65e-20	CD39lo
Bub1b	1.45e-29	-0.2595	0.203	0.288	4.67e-25	CD39lo
Ccnb1	5.84e-24	-0.267837	0.189	0.258	1.89e-19	CD39lo
Hist1h2ae	6.62e-37	-0.268297	0.192	0.284	2.14e-32	CD39lo
Cmc2	1.53e-25	-0.268841	0.279	0.36	4.95e-21	CD39lo
Spc24	2.42e-45	-0.269434	0.291	0.413	7.81e-41	CD39lo
Lockd	8.86e-44	-0.272183	0.424	0.536	2.86e-39	CD39lo
Cyba	7.52e-90	-0.276695	0.821	0.91	2.43e-85	CD39lo
Tubb5	5.96e-113	-0.279073	0.842	0.919	1.92e-108	CD39lo
Smc2	1.26e-81	-0.27939	0.415	0.593	4.07e-77	CD39lo
Ndc80	1.71e-33	-0.279561	0.241	0.334	5.53e-29	CD39lo
Ccnb2	7.21e-37	-0.280145	0.265	0.368	2.33e-32	CD39lo
Cdca2	5e-29	-0.281566	0.187	0.266	1.61e-24	CD39lo
Gpd2	1.53e-19	-0.282022	0.203	0.266	4.94e-15	CD39lo
Bola2	7.7e-58	-0.289231	0.511	0.644	2.49e-53	CD39lo
Cdkn1a	4.62e-88	-0.289868	0.306	0.482	1.49e-83	CD39lo
Rgs3	6.11e-14	-0.290499	0.231	0.281	1.97e-09	CD39lo
Asf1b	3.18e-36	-0.292625	0.261	0.363	1.03e-31	CD39lo
Cxcr6	1.38e-39	-0.294125	0.508	0.61	4.45e-35	CD39lo
Cdca3	3.11e-52	-0.294176	0.27	0.398	1e-47	CD39lo
Ncapd2	2.82e-36	-0.294562	0.264	0.364	9.12e-32	CD39lo
Lasp1	2.01e-20	-0.29595	0.283	0.35	6.49e-16	CD39lo
Sh3bgrl3	6.98e-121	-0.296751	0.878	0.946	2.25e-116	CD39lo
Myo1f	6.23e-46	-0.299925	0.482	0.601	2.01e-41	CD39lo
Kif4	9.67e-47	-0.301772	0.227	0.341	3.12e-42	CD39lo
Racgap1	7.27e-46	-0.30465	0.305	0.422	2.35e-41	CD39lo
Ahnak	9.03e-44	-0.306877	0.46	0.571	2.91e-39	CD39lo
Lgals1	7.98e-194	-0.308274	0.89	0.974	2.58e-189	CD39lo
Rpl38	2.09e-148	-0.309763	0.961	0.978	6.76e-144	CD39lo
Tk1	1.91e-35	-0.316149	0.25	0.347	6.16e-31	CD39lo
Sub1	7.47e-96	-0.316536	0.798	0.895	2.41e-91	CD39lo
Birc5	1.91e-99	-0.31968	0.356	0.556	6.17e-95	CD39lo
Mki67	3.53e-113	-0.321197	0.368	0.573	1.14e-108	CD39lo
Ndufb1-ps	1.29e-75	-0.321248	0.657	0.778	4.17e-71	CD39lo
Arf6	2.3e-50	-0.322959	0.431	0.553	7.43e-46	CD39lo
Shcbp1	2.27e-33	-0.324634	0.203	0.291	7.34e-29	CD39lo
Grina	9.31e-17	-0.325228	0.22	0.277	3e-12	CD39lo
Ndufa3	1.4e-62	-0.328344	0.565	0.694	4.51e-58	CD39lo
Jaml	1.23e-33	-0.328779	0.25	0.341	3.96e-29	CD39lo
Kif11	4.62e-96	-0.332427	0.29	0.473	1.49e-91	CD39lo
Atp5k	3.81e-83	-0.336446	0.601	0.753	1.23e-78	CD39lo
Dbf4	6.25e-30	-0.336687	0.254	0.339	2.02e-25	CD39lo
Cd52	2.54e-133	-0.33704	0.954	0.982	8.2e-129	CD39lo
Tubb4b	1.26e-105	-0.343615	0.519	0.691	4.08e-101	CD39lo
Ugcg	7.99e-32	-0.344666	0.36	0.449	2.58e-27	CD39lo
Efcab11	1.46e-26	-0.346305	0.181	0.253	4.72e-22	CD39lo
Cenpe	1.01e-62	-0.346347	0.269	0.406	3.25e-58	CD39lo
Aurkb	3.76e-37	-0.349221	0.191	0.284	1.22e-32	CD39lo
Top2a	1.64e-151	-0.355463	0.489	0.704	5.29e-147	CD39lo
Mis18bp1	1.67e-30	-0.357904	0.172	0.251	5.39e-26	CD39lo
Pfn1	6.76e-138	-0.361143	0.916	0.959	2.18e-133	CD39lo
Hmmr	8.05e-61	-0.365503	0.229	0.36	2.6e-56	CD39lo
Kif23	4.76e-36	-0.367198	0.193	0.283	1.54e-31	CD39lo
Cdkn2d	4.79e-29	-0.376042	0.338	0.416	1.55e-24	CD39lo
Chsy1	1.14e-45	-0.379058	0.36	0.473	3.68e-41	CD39lo
Ccna2	1.07e-61	-0.382231	0.261	0.397	3.46e-57	CD39lo
Cst7	8.99e-46	-0.391955	0.45	0.553	2.9e-41	CD39lo
Fbxo5	2.14e-61	-0.408255	0.243	0.376	6.91e-57	CD39lo
Incenp	5.06e-92	-0.409475	0.331	0.505	1.63e-87	CD39lo
Padi2	1.66e-37	-0.418686	0.316	0.41	5.36e-33	CD39lo
Ctla2a	1.58e-244	-0.419342	0.77	0.947	5.1e-240	CD39lo
Capn2	1.54e-38	-0.4241	0.247	0.341	4.99e-34	CD39lo
Pik3cg	1.16e-28	-0.425084	0.198	0.274	3.73e-24	CD39lo
Fzr1	3.21e-25	-0.435313	0.206	0.274	1.04e-20	CD39lo
Hmgb2	7.14e-175	-0.445398	0.77	0.904	2.31e-170	CD39lo
Cobll1	4.22e-41	-0.446011	0.189	0.284	1.36e-36	CD39lo
Spred2	4.64e-29	-0.447944	0.185	0.259	1.5e-24	CD39lo
Ctla2b	3.94e-46	-0.451316	0.236	0.341	1.27e-41	CD39lo
Prc1	2.84e-95	-0.454223	0.282	0.45	9.16e-91	CD39lo
Rgs1	6.72e-48	-0.454672	0.209	0.31	2.17e-43	CD39lo
Cdkn3	1e-33	-0.468072	0.172	0.253	3.23e-29	CD39lo
Spc25	1.93e-54	-0.471638	0.204	0.32	6.22e-50	CD39lo
Gadd45g	3.43e-52	-0.472273	0.201	0.307	1.11e-47	CD39lo
Lrrk1	5.26e-61	-0.48866	0.277	0.402	1.7e-56	CD39lo
Ulbp1	1.97e-65	-0.492084	0.283	0.414	6.35e-61	CD39lo
Gpr141	7.66e-151	-0.499205	0.347	0.578	2.47e-146	CD39lo
Ccl5	1.24e-100	-0.500743	0.156	0.296	4.01e-96	CD39lo
Anxa2	5.52e-193	-0.501312	0.582	0.81	1.78e-188	CD39lo
Uba52	3.02e-118	-0.505462	0.576	0.727	9.76e-114	CD39lo
Bbs9	1.04e-35	-0.52859	0.237	0.322	3.37e-31	CD39lo
Nusap1	5.65e-136	-0.529097	0.296	0.506	1.82e-131	CD39lo
Emilin2	6.36e-59	-0.533489	0.157	0.266	2.05e-54	CD39lo
Nkg7	2.21e-195	-0.537268	0.807	0.915	7.13e-191	CD39lo
Tubb6	1.16e-50	-0.543199	0.179	0.281	3.74e-46	CD39lo
Lgals3	2.17e-296	-0.547108	0.478	0.751	7e-292	CD39lo
Ppp4c	4.29e-92	-0.562333	0.415	0.569	1.39e-87	CD39lo
H2afx	2.92e-95	-0.564445	0.375	0.53	9.44e-91	CD39lo
Ube2c	1.39e-104	-0.586065	0.289	0.456	4.48e-100	CD39lo
S100a6	0	-0.58772	0.771	0.962	0	CD39lo
Abr	6.05e-86	-0.589568	0.367	0.514	1.95e-81	CD39lo
Zyx	3.29e-61	-0.593457	0.252	0.371	1.06e-56	CD39lo
Tmem163	4.41e-233	-0.59637	0.387	0.678	1.42e-228	CD39lo
Nfil3	2.22e-52	-0.609591	0.212	0.317	7.16e-48	CD39lo
Hopx	2.11e-65	-0.610297	0.247	0.37	6.82e-61	CD39lo
Sgo1	3.53e-61	-0.612397	0.186	0.302	1.14e-56	CD39lo
Litaf	2.23e-45	-0.616039	0.165	0.256	7.21e-41	CD39lo
Dok2	5.57e-73	-0.621496	0.281	0.412	1.8e-68	CD39lo
Card19	5.09e-56	-0.622599	0.228	0.338	1.64e-51	CD39lo
Cenpf	5.7e-125	-0.624931	0.234	0.419	1.84e-120	CD39lo
Gzmb	0	-0.63138	0.773	0.948	0	CD39lo
Slamf7	2.83e-92	-0.636135	0.315	0.469	9.15e-88	CD39lo
Myo1e	3.75e-64	-0.639441	0.226	0.346	1.21e-59	CD39lo
Tnfrsf9	4.49e-206	-0.641044	0.401	0.645	1.45e-201	CD39lo
Rhoq	7.98e-58	-0.643158	0.197	0.307	2.58e-53	CD39lo
Flt3l	3.85e-44	-0.643503	0.181	0.271	1.24e-39	CD39lo
Fgl2	1.77e-87	-0.647343	0.231	0.378	5.71e-83	CD39lo
Cdk1	8.34e-109	-0.680989	0.255	0.427	2.69e-104	CD39lo
Ifitm2	0	-0.682077	0.629	0.9	0	CD39lo
P2ry14	1.06e-110	-0.690416	0.272	0.445	3.43e-106	CD39lo
Tuba1c	4.65e-114	-0.747316	0.269	0.44	1.5e-109	CD39lo
Ctsd	1.75e-240	-0.771494	0.567	0.772	5.65e-236	CD39lo
Ptpre	4.09e-66	-0.77179	0.192	0.307	1.32e-61	CD39lo
Spp1	3.84e-212	-0.841462	0.139	0.353	1.24e-207	CD39lo
Gm10076	0	-0.867058	0.799	0.928	0	CD39lo
Egr1	2.9e-72	-0.884859	0.142	0.256	9.36e-68	CD39lo
Ccr5	8.25e-172	-0.901551	0.257	0.47	2.66e-167	CD39lo
Sytl2	9.1e-115	-0.902421	0.186	0.347	2.94e-110	CD39lo
Myo10	4.84e-103	-0.921429	0.13	0.269	1.56e-98	CD39lo
Adam8	1.28e-92	-0.940096	0.15	0.284	4.14e-88	CD39lo
Ccr2	0	-1.13577	0.237	0.537	0	CD39lo
Arsb	3.62e-158	-1.14455	0.176	0.361	1.17e-153	CD39lo
Id2	0	-1.20329	0.541	0.845	0	CD39lo
Hist1h2ap	1.89e-230	-1.20536	0.262	0.504	6.11e-226	CD39lo
Lat2	4.74e-122	-1.2434	0.11	0.255	1.53e-117	CD39lo
Gzmc	0	-1.28327	0.314	0.645	0	CD39lo
S100a4	0	-1.51775	0.367	0.771	0	CD39lo
Ly6c2	0	-1.65929	0.32	0.733	0	CD39lo
Entpd1	6.05e-257	-2.0288	0.083	0.3	1.95e-252	CD39lo
Gm36723	0	-2.11789	0.095	0.404	0	CD39lo
Gzma	0	-2.96097	0.219	0.809	0	CD39lo
Gzma	0	2.96097	0.809	0.219	0	CD39+CD69+
Gm36723	0	2.11789	0.404	0.095	0	CD39+CD69+
Entpd1	6.05e-257	2.0288	0.3	0.083	1.95e-252	CD39+CD69+
Ly6c2	0	1.65929	0.733	0.32	0	CD39+CD69+
S100a4	0	1.51775	0.771	0.367	0	CD39+CD69+
Gzmc	0	1.28327	0.645	0.314	0	CD39+CD69+
Lat2	4.74e-122	1.2434	0.255	0.11	1.53e-117	CD39+CD69+
Hist1h2ap	1.89e-230	1.20536	0.504	0.262	6.11e-226	CD39+CD69+
Id2	0	1.20329	0.845	0.541	0	CD39+CD69+
Arsb	3.62e-158	1.14455	0.361	0.176	1.17e-153	CD39+CD69+
Ccr2	0	1.13577	0.537	0.237	0	CD39+CD69+
Adam8	1.28e-92	0.940096	0.284	0.15	4.14e-88	CD39+CD69+
Myo10	4.84e-103	0.921429	0.269	0.13	1.56e-98	CD39+CD69+
Sytl2	9.1e-115	0.902421	0.347	0.186	2.94e-110	CD39+CD69+
Ccr5	8.25e-172	0.901551	0.47	0.257	2.66e-167	CD39+CD69+
Egr1	2.9e-72	0.884859	0.256	0.142	9.36e-68	CD39+CD69+
Gm10076	0	0.867058	0.928	0.799	0	CD39+CD69+
Spp1	3.84e-212	0.841462	0.353	0.139	1.24e-207	CD39+CD69+
Ptpre	4.09e-66	0.77179	0.307	0.192	1.32e-61	CD39+CD69+
Ctsd	1.75e-240	0.771494	0.772	0.567	5.65e-236	CD39+CD69+
Tuba1c	4.65e-114	0.747316	0.44	0.269	1.5e-109	CD39+CD69+
P2ry14	1.06e-110	0.690416	0.445	0.272	3.43e-106	CD39+CD69+
Ifitm2	0	0.682077	0.9	0.629	0	CD39+CD69+
Cdk1	8.34e-109	0.680989	0.427	0.255	2.69e-104	CD39+CD69+
Fgl2	1.77e-87	0.647343	0.378	0.231	5.71e-83	CD39+CD69+
Flt3l	3.85e-44	0.643503	0.271	0.181	1.24e-39	CD39+CD69+
Rhoq	7.98e-58	0.643158	0.307	0.197	2.58e-53	CD39+CD69+
Tnfrsf9	4.49e-206	0.641044	0.645	0.401	1.45e-201	CD39+CD69+
Myo1e	3.75e-64	0.639441	0.346	0.226	1.21e-59	CD39+CD69+
Slamf7	2.83e-92	0.636135	0.469	0.315	9.15e-88	CD39+CD69+
Gzmb	0	0.63138	0.948	0.773	0	CD39+CD69+
Cenpf	5.7e-125	0.624931	0.419	0.234	1.84e-120	CD39+CD69+
Card19	5.09e-56	0.622599	0.338	0.228	1.64e-51	CD39+CD69+
Dok2	5.57e-73	0.621496	0.412	0.281	1.8e-68	CD39+CD69+
Litaf	2.23e-45	0.616039	0.256	0.165	7.21e-41	CD39+CD69+
Sgo1	3.53e-61	0.612397	0.302	0.186	1.14e-56	CD39+CD69+
Hopx	2.11e-65	0.610297	0.37	0.247	6.82e-61	CD39+CD69+
Nfil3	2.22e-52	0.609591	0.317	0.212	7.16e-48	CD39+CD69+
Tmem163	4.41e-233	0.59637	0.678	0.387	1.42e-228	CD39+CD69+
Zyx	3.29e-61	0.593457	0.371	0.252	1.06e-56	CD39+CD69+
Abr	6.05e-86	0.589568	0.514	0.367	1.95e-81	CD39+CD69+
S100a6	0	0.58772	0.962	0.771	0	CD39+CD69+
Ube2c	1.39e-104	0.586065	0.456	0.289	4.48e-100	CD39+CD69+
H2afx	2.92e-95	0.564445	0.53	0.375	9.44e-91	CD39+CD69+
Ppp4c	4.29e-92	0.562333	0.569	0.415	1.39e-87	CD39+CD69+
Lgals3	2.17e-296	0.547108	0.751	0.478	7e-292	CD39+CD69+
Tubb6	1.16e-50	0.543199	0.281	0.179	3.74e-46	CD39+CD69+
Nkg7	2.21e-195	0.537268	0.915	0.807	7.13e-191	CD39+CD69+
Emilin2	6.36e-59	0.533489	0.266	0.157	2.05e-54	CD39+CD69+
Nusap1	5.65e-136	0.529097	0.506	0.296	1.82e-131	CD39+CD69+
Bbs9	1.04e-35	0.52859	0.322	0.237	3.37e-31	CD39+CD69+
Uba52	3.02e-118	0.505462	0.727	0.576	9.76e-114	CD39+CD69+
Anxa2	5.52e-193	0.501312	0.81	0.582	1.78e-188	CD39+CD69+
Ccl5	1.24e-100	0.500743	0.296	0.156	4.01e-96	CD39+CD69+
Gpr141	7.66e-151	0.499205	0.578	0.347	2.47e-146	CD39+CD69+
Ulbp1	1.97e-65	0.492084	0.414	0.283	6.35e-61	CD39+CD69+
Lrrk1	5.26e-61	0.48866	0.402	0.277	1.7e-56	CD39+CD69+
Gadd45g	3.43e-52	0.472273	0.307	0.201	1.11e-47	CD39+CD69+
Spc25	1.93e-54	0.471638	0.32	0.204	6.22e-50	CD39+CD69+
Cdkn3	1e-33	0.468072	0.253	0.172	3.23e-29	CD39+CD69+
Rgs1	6.72e-48	0.454672	0.31	0.209	2.17e-43	CD39+CD69+
Prc1	2.84e-95	0.454223	0.45	0.282	9.16e-91	CD39+CD69+
Ctla2b	3.94e-46	0.451316	0.341	0.236	1.27e-41	CD39+CD69+
Spred2	4.64e-29	0.447944	0.259	0.185	1.5e-24	CD39+CD69+
Cobll1	4.22e-41	0.446011	0.284	0.189	1.36e-36	CD39+CD69+
Hmgb2	7.14e-175	0.445398	0.904	0.77	2.31e-170	CD39+CD69+
Fzr1	3.21e-25	0.435313	0.274	0.206	1.04e-20	CD39+CD69+
Pik3cg	1.16e-28	0.425084	0.274	0.198	3.73e-24	CD39+CD69+
Capn2	1.54e-38	0.4241	0.341	0.247	4.99e-34	CD39+CD69+
Ctla2a	1.58e-244	0.419342	0.947	0.77	5.1e-240	CD39+CD69+
Padi2	1.66e-37	0.418686	0.41	0.316	5.36e-33	CD39+CD69+
Incenp	5.06e-92	0.409475	0.505	0.331	1.63e-87	CD39+CD69+
Fbxo5	2.14e-61	0.408255	0.376	0.243	6.91e-57	CD39+CD69+
Cst7	8.99e-46	0.391955	0.553	0.45	2.9e-41	CD39+CD69+
Ccna2	1.07e-61	0.382231	0.397	0.261	3.46e-57	CD39+CD69+
Chsy1	1.14e-45	0.379058	0.473	0.36	3.68e-41	CD39+CD69+
Cdkn2d	4.79e-29	0.376042	0.416	0.338	1.55e-24	CD39+CD69+
Kif23	4.76e-36	0.367198	0.283	0.193	1.54e-31	CD39+CD69+
Hmmr	8.05e-61	0.365503	0.36	0.229	2.6e-56	CD39+CD69+
Pfn1	6.76e-138	0.361143	0.959	0.916	2.18e-133	CD39+CD69+
Mis18bp1	1.67e-30	0.357904	0.251	0.172	5.39e-26	CD39+CD69+
Top2a	1.64e-151	0.355463	0.704	0.489	5.29e-147	CD39+CD69+
Aurkb	3.76e-37	0.349221	0.284	0.191	1.22e-32	CD39+CD69+
Cenpe	1.01e-62	0.346347	0.406	0.269	3.25e-58	CD39+CD69+
Efcab11	1.46e-26	0.346305	0.253	0.181	4.72e-22	CD39+CD69+
Ugcg	7.99e-32	0.344666	0.449	0.36	2.58e-27	CD39+CD69+
Tubb4b	1.26e-105	0.343615	0.691	0.519	4.08e-101	CD39+CD69+
Cd52	2.54e-133	0.33704	0.982	0.954	8.2e-129	CD39+CD69+
Dbf4	6.25e-30	0.336687	0.339	0.254	2.02e-25	CD39+CD69+
Atp5k	3.81e-83	0.336446	0.753	0.601	1.23e-78	CD39+CD69+
Kif11	4.62e-96	0.332427	0.473	0.29	1.49e-91	CD39+CD69+
Jaml	1.23e-33	0.328779	0.341	0.25	3.96e-29	CD39+CD69+
Ndufa3	1.4e-62	0.328344	0.694	0.565	4.51e-58	CD39+CD69+
Grina	9.31e-17	0.325228	0.277	0.22	3e-12	CD39+CD69+
Shcbp1	2.27e-33	0.324634	0.291	0.203	7.34e-29	CD39+CD69+
Arf6	2.3e-50	0.322959	0.553	0.431	7.43e-46	CD39+CD69+
Ndufb1-ps	1.29e-75	0.321248	0.778	0.657	4.17e-71	CD39+CD69+
Mki67	3.53e-113	0.321197	0.573	0.368	1.14e-108	CD39+CD69+
Birc5	1.91e-99	0.31968	0.556	0.356	6.17e-95	CD39+CD69+
Sub1	7.47e-96	0.316536	0.895	0.798	2.41e-91	CD39+CD69+
Tk1	1.91e-35	0.316149	0.347	0.25	6.16e-31	CD39+CD69+
Rpl38	2.09e-148	0.309763	0.978	0.961	6.76e-144	CD39+CD69+
Lgals1	7.98e-194	0.308274	0.974	0.89	2.58e-189	CD39+CD69+
Ahnak	9.03e-44	0.306877	0.571	0.46	2.91e-39	CD39+CD69+
Racgap1	7.27e-46	0.30465	0.422	0.305	2.35e-41	CD39+CD69+
Kif4	9.67e-47	0.301772	0.341	0.227	3.12e-42	CD39+CD69+
Myo1f	6.23e-46	0.299925	0.601	0.482	2.01e-41	CD39+CD69+
Sh3bgrl3	6.98e-121	0.296751	0.946	0.878	2.25e-116	CD39+CD69+
Lasp1	2.01e-20	0.29595	0.35	0.283	6.49e-16	CD39+CD69+
Ncapd2	2.82e-36	0.294562	0.364	0.264	9.12e-32	CD39+CD69+
Cdca3	3.11e-52	0.294176	0.398	0.27	1e-47	CD39+CD69+
Cxcr6	1.38e-39	0.294125	0.61	0.508	4.45e-35	CD39+CD69+
Asf1b	3.18e-36	0.292625	0.363	0.261	1.03e-31	CD39+CD69+
Rgs3	6.11e-14	0.290499	0.281	0.231	1.97e-09	CD39+CD69+
Cdkn1a	4.62e-88	0.289868	0.482	0.306	1.49e-83	CD39+CD69+
Bola2	7.7e-58	0.289231	0.644	0.511	2.49e-53	CD39+CD69+
Gpd2	1.53e-19	0.282022	0.266	0.203	4.94e-15	CD39+CD69+
Cdca2	5e-29	0.281566	0.266	0.187	1.61e-24	CD39+CD69+
Ccnb2	7.21e-37	0.280145	0.368	0.265	2.33e-32	CD39+CD69+
Ndc80	1.71e-33	0.279561	0.334	0.241	5.53e-29	CD39+CD69+
Smc2	1.26e-81	0.27939	0.593	0.415	4.07e-77	CD39+CD69+
Tubb5	5.96e-113	0.279073	0.919	0.842	1.92e-108	CD39+CD69+
Cyba	7.52e-90	0.276695	0.91	0.821	2.43e-85	CD39+CD69+
Lockd	8.86e-44	0.272183	0.536	0.424	2.86e-39	CD39+CD69+
Spc24	2.42e-45	0.269434	0.413	0.291	7.81e-41	CD39+CD69+
Cmc2	1.53e-25	0.268841	0.36	0.279	4.95e-21	CD39+CD69+
Hist1h2ae	6.62e-37	0.268297	0.284	0.192	2.14e-32	CD39+CD69+
Ccnb1	5.84e-24	0.267837	0.258	0.189	1.89e-19	CD39+CD69+
Bub1b	1.45e-29	0.2595	0.288	0.203	4.67e-25	CD39+CD69+
Hmgcs1	2.99e-24	0.25909	0.344	0.269	9.65e-20	CD39+CD69+
Soat1	1.1e-12	0.258216	0.271	0.223	3.54e-08	CD39+CD69+
Neil3	2.2e-45	0.256578	0.346	0.232	7.11e-41	CD39+CD69+
Klrd1	1.32e-46	0.25485	0.74	0.637	4.25e-42	CD39+CD69+
Hip1	1.48e-37	0.252131	0.451	0.341	4.77e-33	CD39+CD69+
Rpa3	4.03e-15	0.251744	0.291	0.234	1.3e-10	CD39+CD69+
Slc44a2	1.29e-07	-0.250709	0.32	0.354	0.00417374	CD39+CD69+
Trbc1	5.41e-13	-0.251024	0.743	0.765	1.75e-08	CD39+CD69+
Mrpl24	8.62e-09	-0.25255	0.326	0.363	0.000278267	CD39+CD69+
Ptp4a2	4.4e-10	-0.255303	0.702	0.715	1.42e-05	CD39+CD69+
Pias1	1.83e-09	-0.256978	0.41	0.446	5.92e-05	CD39+CD69+
Ankrd11	3.09e-12	-0.257147	0.825	0.824	9.96e-08	CD39+CD69+
Sys1	1.31e-09	-0.259791	0.434	0.469	4.23e-05	CD39+CD69+
Tmod3	4.61e-08	-0.260139	0.425	0.452	0.00148982	CD39+CD69+
Rpl18a	5.24e-12	-0.260989	0.982	0.972	1.69e-07	CD39+CD69+
Fam32a	1.71e-07	-0.261109	0.306	0.338	0.00553411	CD39+CD69+
Rab11b	8.24e-10	-0.26137	0.381	0.421	2.66e-05	CD39+CD69+
Kxd1	1.81e-09	-0.261881	0.366	0.403	5.85e-05	CD39+CD69+
Rnf115	1.54e-06	-0.262047	0.34	0.368	0.0497567	CD39+CD69+
Gabarapl2	3e-09	-0.262509	0.48	0.508	9.67e-05	CD39+CD69+
Psme1	6.88e-11	-0.262594	0.828	0.82	2.22e-06	CD39+CD69+
Atp6v1f	3.34e-07	-0.263101	0.562	0.573	0.0107833	CD39+CD69+
Hnrnpab	1.17e-16	-0.263756	0.709	0.601	3.79e-12	CD39+CD69+
Rplp2	5.52e-08	-0.264622	0.983	0.973	0.00178262	CD39+CD69+
Sdf2	7.28e-07	-0.264911	0.24	0.271	0.0235128	CD39+CD69+
Cyth4	1.01e-07	-0.26547	0.268	0.301	0.00324608	CD39+CD69+
Ankrd44	1.55e-08	-0.265706	0.863	0.86	0.000500596	CD39+CD69+
Naa20	2.91e-09	-0.266153	0.364	0.4	9.41e-05	CD39+CD69+
Epsti1	9.37e-19	-0.266666	0.887	0.87	3.03e-14	CD39+CD69+
Rchy1	5.13e-07	-0.26734	0.244	0.276	0.0165578	CD39+CD69+
Rsrc1	3.79e-09	-0.267451	0.59	0.611	0.000122498	CD39+CD69+
Pde7a	2.55e-10	-0.267623	0.537	0.567	8.23e-06	CD39+CD69+
Pdcd10	1.13e-06	-0.267638	0.544	0.555	0.0364535	CD39+CD69+
Ptpn2	1.52e-07	-0.267649	0.435	0.46	0.00492284	CD39+CD69+
Fbxw2	1.95e-09	-0.267711	0.374	0.411	6.28e-05	CD39+CD69+
Mob2	7.25e-09	-0.268159	0.272	0.309	0.000234069	CD39+CD69+
Gimap9	5.06e-09	-0.269017	0.359	0.393	0.000163413	CD39+CD69+
Usp25	1.82e-09	-0.269288	0.439	0.475	5.88e-05	CD39+CD69+
Rgs10	1.3e-07	-0.270183	0.281	0.315	0.00419771	CD39+CD69+
Syf2	1.46e-08	-0.270465	0.437	0.465	0.000470699	CD39+CD69+
Vmp1	2.94e-07	-0.270482	0.504	0.524	0.0094998	CD39+CD69+
Suclg1	1.4e-06	-0.270904	0.349	0.373	0.0450392	CD39+CD69+
Rps11	1.07e-12	-0.271114	0.983	0.974	3.47e-08	CD39+CD69+
B230219D22Rik	7.73e-07	-0.271396	0.364	0.392	0.0249448	CD39+CD69+
Lnpep	5.31e-09	-0.27153	0.596	0.617	0.000171399	CD39+CD69+
Man2b1	4.24e-07	-0.272047	0.263	0.294	0.0136777	CD39+CD69+
Ppp4r3a	1.26e-06	-0.272291	0.35	0.379	0.0405638	CD39+CD69+
Ubn1	8.87e-07	-0.272406	0.408	0.432	0.0286529	CD39+CD69+
Git2	1.32e-08	-0.272746	0.394	0.428	0.000425818	CD39+CD69+
Esyt2	2.02e-10	-0.273108	0.588	0.616	6.51e-06	CD39+CD69+
4932438A13Rik	1.62e-10	-0.273221	0.443	0.481	5.25e-06	CD39+CD69+
Slc3a2	8.78e-08	-0.27335	0.412	0.441	0.00283623	CD39+CD69+
Tnks2	8.29e-07	-0.273583	0.538	0.552	0.0267512	CD39+CD69+
Resf1	1.93e-07	-0.273979	0.371	0.399	0.00621973	CD39+CD69+
Sri	9.71e-08	-0.274143	0.673	0.673	0.00313421	CD39+CD69+
Sec62	4.49e-10	-0.2742	0.517	0.545	1.45e-05	CD39+CD69+
Zc3h7a	1.54e-06	-0.274674	0.349	0.376	0.049807	CD39+CD69+
Rps27l	9.76e-22	-0.275501	0.789	0.674	3.15e-17	CD39+CD69+
Fli1	5.77e-07	-0.276029	0.76	0.759	0.0186417	CD39+CD69+
Virma	5.21e-08	-0.276856	0.366	0.398	0.00168075	CD39+CD69+
Shoc2	3.79e-07	-0.276858	0.252	0.284	0.0122418	CD39+CD69+
Fam192a	1.32e-06	-0.27717	0.236	0.266	0.0427012	CD39+CD69+
Sp100	9.8e-23	-0.277396	0.682	0.722	3.16e-18	CD39+CD69+
Rpl30	9.13e-19	-0.277625	0.984	0.977	2.95e-14	CD39+CD69+
Brd4	6.57e-08	-0.278412	0.619	0.634	0.00212124	CD39+CD69+
Cbx4	1.09e-07	-0.278456	0.286	0.318	0.00352854	CD39+CD69+
Rtf2	1.05e-06	-0.279001	0.378	0.402	0.0338001	CD39+CD69+
Apobec3	3.39e-14	-0.279152	0.648	0.678	1.09e-09	CD39+CD69+
Nin	4.34e-07	-0.27926	0.29	0.32	0.0140002	CD39+CD69+
Lypla1	9.16e-07	-0.280176	0.225	0.254	0.0295861	CD39+CD69+
Nfat5	1.15e-08	-0.28108	0.402	0.436	0.000370859	CD39+CD69+
Mcl1	3.28e-16	-0.281232	0.541	0.586	1.06e-11	CD39+CD69+
Ep400	8.8e-08	-0.28142	0.504	0.524	0.00284144	CD39+CD69+
Wasf2	3.65e-08	-0.281431	0.533	0.552	0.00117727	CD39+CD69+
Vps35l	3.85e-08	-0.28158	0.219	0.253	0.00124164	CD39+CD69+
Rnf20	3.31e-07	-0.2816	0.271	0.302	0.0106788	CD39+CD69+
mt-Co1	5.19e-13	-0.281843	0.996	0.994	1.67e-08	CD39+CD69+
Apbb1ip	2.22e-16	-0.282504	0.64	0.674	7.18e-12	CD39+CD69+
Chrac1	1.17e-06	-0.28336	0.32	0.347	0.0377065	CD39+CD69+
Atg3	4.59e-07	-0.28358	0.312	0.342	0.0148209	CD39+CD69+
Nsmce2	6.17e-07	-0.284022	0.508	0.526	0.0199343	CD39+CD69+
Ddx24	5.51e-08	-0.284537	0.595	0.608	0.00178038	CD39+CD69+
Cbll1	1.81e-08	-0.284666	0.239	0.274	0.000582882	CD39+CD69+
Wdr70	6.54e-07	-0.285065	0.299	0.328	0.0211242	CD39+CD69+
Ppp2r5c	2.88e-12	-0.286089	0.507	0.541	9.31e-08	CD39+CD69+
Tor1aip1	3.88e-12	-0.286181	0.443	0.483	1.25e-07	CD39+CD69+
Scamp3	6.54e-07	-0.287602	0.228	0.257	0.0210999	CD39+CD69+
Gsk3b	4.24e-07	-0.287916	0.555	0.563	0.0136748	CD39+CD69+
Rpl17	1.28e-17	-0.288517	0.972	0.962	4.12e-13	CD39+CD69+
Eif5a	2.9e-11	-0.288621	0.856	0.793	9.35e-07	CD39+CD69+
Golga4	7.44e-09	-0.288851	0.235	0.272	0.000240177	CD39+CD69+
Ncor1	2e-13	-0.289184	0.713	0.732	6.47e-09	CD39+CD69+
Rps24	9.07e-39	-0.289275	0.978	0.972	2.93e-34	CD39+CD69+
Mdp1	1.86e-07	-0.289475	0.275	0.306	0.00598931	CD39+CD69+
Eci2	4.43e-07	-0.289514	0.23	0.26	0.0142917	CD39+CD69+
Mettl9	1.53e-06	-0.289644	0.303	0.329	0.0492874	CD39+CD69+
Tut7	1.22e-11	-0.290162	0.383	0.426	3.93e-07	CD39+CD69+
Ccdc174	3.26e-08	-0.290428	0.251	0.285	0.00105135	CD39+CD69+
Safb2	1.21e-07	-0.290599	0.336	0.365	0.00391108	CD39+CD69+
Tent2	1.14e-07	-0.290949	0.315	0.347	0.00368376	CD39+CD69+
Rbm39	3.55e-18	-0.291097	0.939	0.936	1.15e-13	CD39+CD69+
Tmem50a	8.02e-13	-0.291228	0.499	0.534	2.59e-08	CD39+CD69+
Rpl27	1.7e-12	-0.291423	0.979	0.973	5.49e-08	CD39+CD69+
Ythdc1	2.35e-13	-0.292046	0.634	0.658	7.59e-09	CD39+CD69+
Snx20	2.57e-07	-0.292142	0.239	0.27	0.00831194	CD39+CD69+
Wipf1	6.34e-19	-0.292623	0.593	0.637	2.05e-14	CD39+CD69+
Atf7ip	5.88e-09	-0.292636	0.26	0.297	0.000189848	CD39+CD69+
Zfand6	5.54e-08	-0.292679	0.527	0.544	0.00178703	CD39+CD69+
Dctn6	1.17e-06	-0.29339	0.247	0.274	0.0376952	CD39+CD69+
Xrn2	4.93e-09	-0.294921	0.617	0.625	0.000159249	CD39+CD69+
Srcap	5.93e-08	-0.295324	0.28	0.312	0.00191369	CD39+CD69+
Add1	2.41e-09	-0.295361	0.418	0.451	7.78e-05	CD39+CD69+
Sat1	8.32e-13	-0.295666	0.218	0.263	2.69e-08	CD39+CD69+
Kat6a	3.19e-10	-0.295673	0.353	0.391	1.03e-05	CD39+CD69+
Lamp1	1.96e-08	-0.296119	0.42	0.446	0.000631629	CD39+CD69+
Pip4k2a	3.89e-08	-0.296704	0.479	0.501	0.00125654	CD39+CD69+
Gmfg	5.74e-07	-0.296713	0.745	0.73	0.0185349	CD39+CD69+
Dnttip1	2.1e-08	-0.297321	0.224	0.258	0.000678886	CD39+CD69+
Mkrn1	4.04e-07	-0.297861	0.356	0.381	0.0130432	CD39+CD69+
Ppp1r12a	3.14e-17	-0.297877	0.721	0.745	1.01e-12	CD39+CD69+
Brd7	1.23e-07	-0.298264	0.337	0.365	0.00397309	CD39+CD69+
Supt20	3.28e-09	-0.298337	0.31	0.346	0.000106029	CD39+CD69+
Stx5a	6.25e-08	-0.298496	0.229	0.262	0.00201849	CD39+CD69+
Ddx50	2.22e-11	-0.299389	0.358	0.397	7.16e-07	CD39+CD69+
Ddx5	5.49e-19	-0.299465	0.925	0.924	1.77e-14	CD39+CD69+
Rps27rt	2.37e-10	-0.30012	0.274	0.313	7.64e-06	CD39+CD69+
Pi4ka	1.17e-08	-0.300695	0.284	0.319	0.00037728	CD39+CD69+
Mapk1	1.51e-13	-0.301001	0.504	0.541	4.89e-09	CD39+CD69+
Oxa1l	1.89e-10	-0.301061	0.268	0.308	6.12e-06	CD39+CD69+
Cdk11b	5.18e-11	-0.30141	0.454	0.487	1.67e-06	CD39+CD69+
Erap1	1.24e-08	-0.301608	0.283	0.317	0.000399642	CD39+CD69+
Tmem234	2.24e-15	-0.302089	0.524	0.565	7.24e-11	CD39+CD69+
Ostf1	4.33e-07	-0.302221	0.664	0.664	0.0139903	CD39+CD69+
Atp6v1d	7.24e-11	-0.302425	0.347	0.386	2.34e-06	CD39+CD69+
Rnf4	4.53e-08	-0.302966	0.373	0.401	0.00146396	CD39+CD69+
Psmg4	1.61e-07	-0.303152	0.393	0.416	0.0052099	CD39+CD69+
Cmip	8.7e-10	-0.303624	0.643	0.654	2.81e-05	CD39+CD69+
Sfswap	8.73e-08	-0.303703	0.311	0.342	0.00281765	CD39+CD69+
Cstf3	8.22e-08	-0.303734	0.383	0.411	0.0026545	CD39+CD69+
Arhgap17	2.08e-07	-0.303895	0.222	0.253	0.00672613	CD39+CD69+
Jtb	1.58e-07	-0.303953	0.233	0.265	0.00509348	CD39+CD69+
Srsf11	6.5e-07	-0.30405	0.661	0.66	0.0209855	CD39+CD69+
Cpsf6	2.3e-09	-0.304052	0.427	0.455	7.41e-05	CD39+CD69+
Tnrc6a	2.47e-08	-0.304297	0.418	0.447	0.000798676	CD39+CD69+
Trip11	2.4e-13	-0.305447	0.366	0.416	7.75e-09	CD39+CD69+
Itsn2	4.38e-11	-0.305669	0.443	0.48	1.41e-06	CD39+CD69+
H3f3a	5.28e-11	-0.30567	0.878	0.879	1.7e-06	CD39+CD69+
2025-03-02	2.86e-12	-0.305831	0.333	0.378	9.23e-08	CD39+CD69+
Rpl12	3.59e-08	-0.306452	0.974	0.965	0.00115957	CD39+CD69+
Aamp	6.09e-08	-0.306567	0.289	0.321	0.00196664	CD39+CD69+
Prpf8	5.7e-08	-0.306801	0.326	0.356	0.00183941	CD39+CD69+
Frmd8	6.23e-08	-0.306999	0.28	0.312	0.00201099	CD39+CD69+
Riok3	2.52e-08	-0.307474	0.323	0.354	0.000815159	CD39+CD69+
Pitpnc1	9.75e-25	-0.307587	0.866	0.884	3.15e-20	CD39+CD69+
Ndufv2	2.12e-07	-0.307689	0.447	0.465	0.00683176	CD39+CD69+
Acap2	3.65e-09	-0.307823	0.319	0.354	0.000117756	CD39+CD69+
Kcmf1	6.31e-09	-0.307887	0.409	0.437	0.000203566	CD39+CD69+
Ppp2r5e	9.81e-09	-0.307894	0.334	0.368	0.000316756	CD39+CD69+
Atxn7l3b	3.3e-10	-0.307901	0.313	0.353	1.07e-05	CD39+CD69+
Idh3b	8.7e-10	-0.308228	0.281	0.319	2.81e-05	CD39+CD69+
Ngdn	3.56e-08	-0.308296	0.251	0.284	0.00114993	CD39+CD69+
Lims1	2.86e-08	-0.308897	0.524	0.54	0.000924751	CD39+CD69+
Gm17018	7.42e-08	-0.309203	0.305	0.334	0.00239457	CD39+CD69+
Slc10a7	6.49e-08	-0.309573	0.375	0.403	0.00209407	CD39+CD69+
Hsp90aa1	3.21e-15	-0.309575	0.813	0.73	1.04e-10	CD39+CD69+
BC005624	5.69e-10	-0.309699	0.25	0.29	1.84e-05	CD39+CD69+
Rbm5	6.43e-12	-0.309754	0.445	0.483	2.08e-07	CD39+CD69+
Herc1	2.52e-12	-0.310155	0.442	0.481	8.14e-08	CD39+CD69+
Tgoln1	2.28e-08	-0.31058	0.234	0.269	0.000737034	CD39+CD69+
4921524J17Rik	8.04e-10	-0.310643	0.219	0.257	2.6e-05	CD39+CD69+
Hk1	2.14e-07	-0.310648	0.463	0.481	0.00690254	CD39+CD69+
Ufd1	3.91e-08	-0.311012	0.23	0.263	0.00126165	CD39+CD69+
Rps13	1.35e-15	-0.311253	0.979	0.971	4.35e-11	CD39+CD69+
Ppil2	5.21e-11	-0.311359	0.293	0.335	1.68e-06	CD39+CD69+
Fam49b	4.46e-07	-0.311764	0.796	0.781	0.0143944	CD39+CD69+
Uqcc3	5.43e-08	-0.312179	0.313	0.343	0.00175362	CD39+CD69+
Rabep1	9.45e-07	-0.312756	0.35	0.374	0.0305139	CD39+CD69+
Golph3	6.97e-07	-0.313212	0.225	0.253	0.0225177	CD39+CD69+
Cd53	6.87e-15	-0.313424	0.635	0.661	2.22e-10	CD39+CD69+
Rsrc2	8.84e-13	-0.313431	0.619	0.644	2.86e-08	CD39+CD69+
Sltm	1.15e-08	-0.313557	0.504	0.527	0.000371816	CD39+CD69+
Tmx3	7.25e-08	-0.313743	0.228	0.259	0.00233997	CD39+CD69+
Fgf13	1.55e-07	-0.314116	0.362	0.392	0.0050115	CD39+CD69+
Pdcd6	6.6e-10	-0.314185	0.413	0.447	2.13e-05	CD39+CD69+
Ppp2r5a	1.67e-11	-0.314259	0.411	0.448	5.39e-07	CD39+CD69+
Pak1ip1	1.2e-07	-0.314346	0.319	0.349	0.00388505	CD39+CD69+
Gimap5	2.74e-16	-0.314369	0.355	0.41	8.85e-12	CD39+CD69+
Rpl18	1.75e-17	-0.314705	0.98	0.975	5.65e-13	CD39+CD69+
Plaa	6.87e-07	-0.314732	0.361	0.386	0.0221875	CD39+CD69+
Ikzf1	5.74e-21	-0.314839	0.804	0.814	1.85e-16	CD39+CD69+
Klhl6	7.24e-09	-0.314987	0.33	0.363	0.000233851	CD39+CD69+
Macf1	6.47e-15	-0.315029	0.679	0.704	2.09e-10	CD39+CD69+
H2-T23	3.55e-14	-0.315421	0.392	0.438	1.15e-09	CD39+CD69+
Arid5a	8.49e-07	-0.315569	0.257	0.285	0.0274002	CD39+CD69+
Rps18	2.59e-11	-0.315602	0.978	0.971	8.36e-07	CD39+CD69+
Ganab	2.12e-07	-0.31565	0.223	0.254	0.00685334	CD39+CD69+
Ube2b	7.49e-13	-0.315686	0.557	0.584	2.42e-08	CD39+CD69+
Ggnbp2	1.89e-15	-0.315688	0.596	0.627	6.09e-11	CD39+CD69+
Svbp	6.6e-10	-0.31571	0.215	0.253	2.13e-05	CD39+CD69+
Rlf	3.47e-18	-0.315729	0.504	0.554	1.12e-13	CD39+CD69+
Phc2	1.19e-11	-0.315744	0.293	0.337	3.83e-07	CD39+CD69+
Xrn1	6.23e-13	-0.315929	0.409	0.453	2.01e-08	CD39+CD69+
Rbm10	7.27e-07	-0.316751	0.242	0.27	0.0234805	CD39+CD69+
[truncated: 1,336 more rows]

## Sheet: Pmel_Allcluster_RNAClustmarkers
gene	p_val	avg_log2FC	pct.1	pct.2	p_val_adj	cluster
Hist1h1b	0	1.40714	0.924	0.414	0	0
Top2a	0	1.40623	0.998	0.686	0	0
Mki67	0	1.34041	0.953	0.455	0	0
Hist1h2ap	0	1.23137	0.908	0.379	0	0
Kif11	0	1.16909	0.899	0.319	0	0
Nusap1	0	1.16471	0.926	0.358	0	0
Cenpf	0	1.1574	0.843	0.264	0	0
Tubb5	0	1.05799	1	0.971	0	0
Prc1	0	1.01683	0.84	0.3	0	0
Hmgb2	0	0.993436	1	0.948	0	0
Diaph3	0	0.966168	0.884	0.412	0	0
Stmn1	0	0.963879	0.995	0.791	0	0
Cenpe	0	0.95143	0.782	0.25	0	0
H2afx	0	0.949728	0.844	0.413	0	0
Kif15	0	0.92662	0.864	0.36	0	0
H2afv	0	0.920674	0.927	0.671	0	0
Pclaf	0	0.916044	0.975	0.673	0	0
Incenp	0	0.901422	0.853	0.359	0	0
Tuba1b	0	0.900011	0.993	0.797	0	0
Smc4	0	0.889484	0.979	0.749	0	0
Birc5	0	0.833152	0.897	0.436	0	0
Ube2c	0	0.825257	0.769	0.331	0	0
Lockd	0	0.818906	0.824	0.411	0	0
Tpx2	0	0.818818	0.784	0.319	0	0
Neil3	0	0.799231	0.689	0.205	0	0
Hist1h1e	0	0.798939	0.693	0.242	0	0
Smc2	0	0.796857	0.889	0.486	0	0
Lmnb1	0	0.794868	0.864	0.47	0	0
Cenpp	0	0.785129	0.689	0.241	0	0
Knl1	0	0.7768	0.701	0.22	0	0
Tmpo	0	0.762002	0.894	0.565	0	0
Cit	0	0.75699	0.704	0.227	0	0
Cdca8	0	0.74519	0.796	0.341	0	0
Hmmr	0	0.744296	0.686	0.217	0	0
Hjurp	0	0.740045	0.755	0.311	0	0
Kif4	0	0.739558	0.675	0.203	0	0
Cep128	0	0.736897	0.718	0.267	0	0
Rad21	0	0.736853	0.806	0.409	0	0
Tubb4b	0	0.709452	0.944	0.667	0	0
Ckap5	0	0.706548	0.791	0.38	0	0
Racgap1	0	0.703553	0.731	0.278	0	0
Hist1h4d	0	0.699962	0.664	0.267	0	0
Ube2s	0	0.691519	0.956	0.719	0	0
Hist1h2ae	0	0.682593	0.572	0.169	0	0
Cenpa	0	0.673847	0.726	0.317	0	0
Ndc80	0	0.659432	0.641	0.205	0	0
Esco2	0	0.638091	0.591	0.188	0	0
Ncapg2	0	0.634734	0.656	0.25	0	0
Ncapd3	0	0.633473	0.708	0.305	0	0
Kif20b	0	0.629895	0.604	0.205	0	0
Kif23	0	0.62791	0.58	0.166	0	0
Hmgb1	0	0.624015	0.999	0.952	0	0
Spc25	0	0.61471	0.602	0.188	0	0
Fbxo5	0	0.610819	0.648	0.234	0	0
Ect2	0	0.607431	0.578	0.181	0	0
Ncapd2	0	0.607257	0.648	0.228	0	0
Efcab11	0	0.602754	0.53	0.152	0	0
Brip1	0	0.599648	0.612	0.232	0	0
Cdca3	0	0.593852	0.675	0.256	0	0
Ccna2	0	0.591828	0.666	0.254	0	0
Cdk1	0	0.590102	0.685	0.271	0	0
Mis18bp1	0	0.581519	0.538	0.142	0	0
Bub1b	0	0.576404	0.555	0.173	0	0
Shcbp1	0	0.550636	0.571	0.173	0	0
Dlgap5	0	0.549121	0.552	0.179	0	0
Anln	0	0.53354	0.512	0.136	0	0
Kif22	0	0.52474	0.541	0.174	0	0
Ccnf	0	0.505555	0.504	0.142	0	0
Hist2h2ac	0	0.502513	0.427	0.114	0	0
Aspm	0	0.497237	0.439	0.115	0	0
Spag5	0	0.495305	0.479	0.139	0	0
Kif18b	0	0.488948	0.428	0.098	0	0
Sgo2a	0	0.472596	0.462	0.126	0	0
Kif14	0	0.419231	0.395	0.099	0	0
Clspn	4.39e-307	0.696552	0.761	0.367	7.27e-303	0
Cdca2	1.09e-306	0.504083	0.499	0.16	1.81e-302	0
Stil	1.54e-303	0.462661	0.464	0.139	2.55e-299	0
Ckap2l	6.68e-302	0.461566	0.449	0.132	1.11e-297	0
Dleu2	7.84e-301	0.669963	0.672	0.293	1.3e-296	0
Arhgap11a	4.66e-300	0.463376	0.466	0.143	7.72e-296	0
Sgo1	1.83e-299	0.496358	0.526	0.179	3.02e-295	0
Cep55	6.48e-294	0.461129	0.469	0.145	1.07e-289	0
Hist1h1c	1e-286	0.490691	0.449	0.14	1.66e-282	0
Ncapg	3.24e-285	0.486771	0.532	0.189	5.37e-281	0
Ccnb2	3.26e-285	0.547501	0.619	0.243	5.4e-281	0
Mxd3	1.64e-283	0.421003	0.421	0.121	2.72e-279	0
Mastl	9.1e-282	0.475009	0.481	0.158	1.51e-277	0
Dek	1.33e-280	0.668069	0.948	0.765	2.2e-276	0
Nsd2	3.79e-280	0.643262	0.809	0.449	6.29e-276	0
Rfwd3	1.59e-277	0.577112	0.643	0.278	2.64e-273	0
Hist1h1d	2.63e-276	0.43843	0.393	0.11	4.35e-272	0
Tacc3	3.24e-276	0.520038	0.61	0.247	5.38e-272	0
Rbl1	8.02e-274	0.535422	0.589	0.238	1.33e-269	0
Depdc1b	3.8e-273	0.332572	0.287	0.059	6.3e-269	0
Ezh2	1.12e-267	0.631558	0.835	0.491	1.86e-263	0
Rad51b	1.63e-267	0.689996	0.83	0.486	2.7e-263	0
Rrm1	4.71e-263	0.608045	0.763	0.41	7.81e-259	0
Depdc1a	3.49e-262	0.371115	0.369	0.1	5.79e-258	0
Ulbp1	1.48e-251	0.543841	0.622	0.273	2.45e-247	0
Arl6ip1	1.17e-248	0.688303	0.914	0.739	1.93e-244	0
Kif18a	2.77e-247	0.417801	0.431	0.14	4.58e-243	0
Bub1	6.69e-242	0.422455	0.427	0.142	1.11e-237	0
Spc24	6.7e-241	0.498651	0.622	0.276	1.11e-236	0
Parpbp	6.58e-238	0.339422	0.316	0.081	1.09e-233	0
Plk1	3.46e-237	0.406563	0.41	0.131	5.73e-233	0
Rrm2	1.74e-235	0.551218	0.725	0.363	2.88e-231	0
Gm43305	1.26e-234	0.568294	0.599	0.27	2.1e-230	0
Ckap2	1.75e-233	0.406614	0.407	0.132	2.9e-229	0
Odf2	2.15e-233	0.506486	0.587	0.259	3.57e-229	0
Zfp367	2.67e-231	0.538904	0.63	0.292	4.43e-227	0
Kifc1	3.36e-228	0.357337	0.368	0.11	5.56e-224	0
E2f7	7.3e-228	0.408949	0.44	0.152	1.21e-223	0
Brca1	4.35e-227	0.479597	0.503	0.197	7.21e-223	0
H2afz	1.04e-222	0.515333	0.999	0.934	1.73e-218	0
Aurkb	2.44e-219	0.422327	0.474	0.178	4.04e-215	0
Ttk	4.7e-218	0.339469	0.34	0.099	7.79e-214	0
Cdk19	1.29e-217	0.496724	0.581	0.261	2.14e-213	0
Anp32e	2.96e-215	0.556027	0.823	0.534	4.9e-211	0
Nuf2	1.31e-213	0.344769	0.371	0.117	2.16e-209	0
Atad2	1.86e-213	0.601325	0.768	0.456	3.08e-209	0
Nucks1	1.74e-212	0.547365	0.893	0.662	2.89e-208	0
Prr11	1.09e-211	0.298489	0.275	0.068	1.8e-207	0
Serinc3	6.33e-209	0.56538	0.792	0.503	1.05e-204	0
Aurka	7.07e-209	0.358025	0.39	0.129	1.17e-204	0
Hist1h3c	2.36e-208	0.350093	0.36	0.114	3.92e-204	0
Cip2a	1.26e-207	0.373677	0.387	0.13	2.09e-203	0
Smc1a	3.48e-206	0.536595	0.886	0.654	5.76e-202	0
Polq	3.72e-206	0.368661	0.385	0.129	6.17e-202	0
Cdc25b	7.28e-205	0.374372	0.35	0.109	1.21e-200	0
Tuba1c	2.02e-204	0.48476	0.615	0.289	3.35e-200	0
Bard1	2.13e-204	0.366594	0.406	0.142	3.54e-200	0
Asf1b	2.92e-204	0.448989	0.55	0.241	4.85e-200	0
Calm2	7.25e-200	0.550113	0.928	0.802	1.2e-195	0
Pimreg	1.15e-198	0.348859	0.387	0.13	1.9e-194	0
Ncaph	7.32e-198	0.359639	0.386	0.133	1.21e-193	0
Rangap1	1.15e-197	0.501892	0.722	0.408	1.91e-193	0
Melk	3.63e-193	0.341522	0.363	0.121	6.01e-189	0
Ticrr	3.97e-193	0.344263	0.376	0.128	6.57e-189	0
Cenpl	1.77e-191	0.293004	0.294	0.083	2.93e-187	0
Ctcf	1.64e-190	0.512794	0.801	0.53	2.72e-186	0
Ccdc18	1.83e-188	0.304085	0.297	0.086	3.03e-184	0
Brd8	3.46e-188	0.461461	0.629	0.322	5.74e-184	0
Espl1	1.1e-186	0.288916	0.287	0.081	1.83e-182	0
Plk4	8.5e-186	0.364889	0.433	0.168	1.41e-181	0
Ncaph2	9.37e-186	0.471076	0.66	0.353	1.55e-181	0
Cdkn3	5.22e-185	0.372281	0.421	0.159	8.65e-181	0
Hnrnpa3	3.29e-183	0.492095	0.959	0.87	5.46e-179	0
Kif2c	1.09e-182	0.299975	0.316	0.098	1.81e-178	0
Knstrn	1.16e-181	0.373083	0.431	0.168	1.92e-177	0
Smchd1	1.11e-180	0.511968	0.89	0.685	1.83e-176	0
Foxm1	1.41e-180	0.278971	0.285	0.082	2.33e-176	0
Dbf4	2.31e-177	0.393658	0.513	0.229	3.83e-173	0
Trim59	1.54e-175	0.35152	0.39	0.146	2.55e-171	0
Rps6ka5	3.37e-175	0.450615	0.581	0.285	5.58e-171	0
Gas2l3	4.74e-174	0.266862	0.256	0.069	7.85e-170	0
Cdkn2d	1.54e-173	0.428856	0.598	0.3	2.56e-169	0
G2e3	2.05e-173	0.357657	0.392	0.149	3.4e-169	0
Cenpc1	7.96e-173	0.401656	0.497	0.222	1.32e-168	0
Arhgap19	2.49e-171	0.263523	0.255	0.07	4.12e-167	0
Ska2	5.66e-171	0.333122	0.383	0.143	9.39e-167	0
Sass6	1.42e-170	0.345208	0.413	0.162	2.36e-166	0
Pou2f1	1.2e-169	0.389274	0.46	0.196	1.99e-165	0
Tyms	1.64e-167	0.466651	0.663	0.361	2.72e-163	0
Srgap2	3.42e-165	0.45336	0.67	0.377	5.66e-161	0
Kif20a	1.48e-164	0.321158	0.354	0.128	2.45e-160	0
Stag1	1.88e-164	0.504132	0.878	0.685	3.12e-160	0
Rpl9	5.19e-164	-0.326264	1	1	8.6e-160	0
Cdca5	9.62e-164	0.297488	0.332	0.114	1.59e-159	0
Cks2	1.21e-163	0.489915	0.764	0.477	2.01e-159	0
Suz12	4.85e-163	0.460447	0.744	0.461	8.03e-159	0
Lbr	1.85e-161	0.455628	0.707	0.42	3.07e-157	0
Cbx5	1.02e-159	0.40066	0.633	0.332	1.69e-155	0
Bub3	6.38e-159	0.451294	0.766	0.489	1.06e-154	0
Fzr1	1.2e-156	0.361175	0.434	0.186	1.98e-152	0
Pola1	1.53e-156	0.479507	0.7	0.409	2.54e-152	0
Dnmt1	2.04e-156	0.4457	0.703	0.417	3.38e-152	0
Ska3	4.3e-152	0.264003	0.293	0.096	7.12e-148	0
Gm42031	8.82e-152	0.355457	0.35	0.134	1.46e-147	0
Ska1	2.11e-151	0.300657	0.334	0.122	3.5e-147	0
Rb1	1.15e-150	0.424563	0.566	0.298	1.91e-146	0
Cdkn2c	2.64e-150	0.316073	0.392	0.158	4.38e-146	0
Cep57	2.8e-150	0.384128	0.558	0.284	4.64e-146	0
Kntc1	1.05e-149	0.332307	0.384	0.154	1.74e-145	0
Ccnb1	1e-148	0.344508	0.413	0.172	1.66e-144	0
Spdl1	5.08e-148	0.289481	0.33	0.121	8.42e-144	0
Asxl1	5.61e-148	0.438285	0.659	0.383	9.3e-144	0
Hmgn2	5.11e-146	0.443978	0.686	0.407	8.47e-142	0
E2f8	5.7e-146	0.290754	0.312	0.111	9.44e-142	0
Gm42047	8.04e-145	0.503788	0.467	0.227	1.33e-140	0
Rad54b	2.96e-144	0.265413	0.283	0.095	4.91e-140	0
Pcnt	2.86e-143	0.373829	0.526	0.265	4.74e-139	0
Mast2	3.27e-143	0.330769	0.411	0.176	5.41e-139	0
Kif24	3.71e-143	0.287152	0.307	0.109	6.14e-139	0
Mad2l1	1.31e-142	0.302973	0.405	0.171	2.18e-138	0
Brip1os	1.27e-140	0.418552	0.572	0.309	2.1e-136	0
Atp8b4	2.98e-140	0.453057	0.962	0.891	4.93e-136	0
Cntrl	2.25e-139	0.427834	0.71	0.448	3.73e-135	0
Polh	9.3e-139	0.26961	0.298	0.106	1.54e-134	0
Fancd2	4.85e-138	0.270628	0.286	0.099	8.03e-134	0
Rad51ap1	1.07e-137	0.304953	0.386	0.161	1.77e-133	0
Tnks	2.11e-137	0.345941	0.457	0.214	3.5e-133	0
Cep57l1	5.83e-137	0.326883	0.379	0.16	9.67e-133	0
Btf3	2.07e-136	-0.424505	0.933	0.983	3.42e-132	0
Rpl5	7.25e-135	-0.286471	1	1	1.2e-130	0
Cbfb	6.57e-134	0.392575	0.667	0.394	1.09e-129	0
Lin54	8.14e-134	0.275474	0.335	0.13	1.35e-129	0
Ppp1r14b	1.89e-133	-0.580202	0.492	0.707	3.13e-129	0
Rps15a	1.16e-132	-0.282824	1	1	1.92e-128	0
Cdc20	5.74e-132	0.335838	0.445	0.2	9.51e-128	0
Anp32b	5.18e-131	0.361344	0.987	0.936	8.59e-127	0
Slc9a9	5.93e-131	0.532229	0.827	0.633	9.83e-127	0
Myh9	9.89e-131	0.428732	0.92	0.809	1.64e-126	0
Gmnn	1.45e-130	0.407849	0.714	0.452	2.4e-126	0
Nrf1	5.69e-130	0.378818	0.586	0.326	9.43e-126	0
Dnah8	1.61e-129	0.359928	0.384	0.168	2.66e-125	0
Malat1	1.69e-129	0.30502	1	0.997	2.8e-125	0
Ccdc34	2.16e-129	0.33779	0.447	0.212	3.58e-125	0
Pbrm1	2.26e-129	0.415485	0.715	0.471	3.75e-125	0
Mns1	4.85e-129	0.33233	0.455	0.219	8.03e-125	0
Lcorl	5.36e-128	0.360061	0.525	0.274	8.89e-124	0
Baz1b	6.23e-128	0.405585	0.693	0.431	1.03e-123	0
Dyrk1a	5.53e-127	0.362152	0.507	0.264	9.16e-123	0
Xpo1	7.06e-127	0.371066	0.615	0.351	1.17e-122	0
C2cd5	8.77e-127	0.325961	0.475	0.233	1.45e-122	0
Umad1	1.12e-126	0.326051	0.433	0.202	1.85e-122	0
Cmc2	1.19e-125	0.331764	0.495	0.253	1.97e-121	0
Atad5	1e-124	0.355942	0.473	0.235	1.66e-120	0
Zwilch	1.35e-124	0.25653	0.312	0.121	2.24e-120	0
Cbx3	2.36e-124	0.397948	0.836	0.633	3.91e-120	0
Iqgap2	4.34e-124	0.439743	0.801	0.604	7.19e-120	0
Gm49980	5.79e-124	0.310422	0.42	0.195	9.6e-120	0
Akt3	3.99e-123	0.392269	0.606	0.347	6.62e-119	0
Bora	1.66e-122	0.278952	0.341	0.141	2.75e-118	0
Tuba1a	8.77e-121	0.363967	0.604	0.344	1.45e-116	0
Cenpm	9.79e-121	0.299785	0.409	0.189	1.62e-116	0
Usp1	2.54e-120	0.341571	0.548	0.297	4.21e-116	0
Blm	2.56e-120	0.303892	0.419	0.196	4.25e-116	0
Pbk	4.36e-120	0.267837	0.325	0.132	7.22e-116	0
Mad1l1	5.38e-120	0.305283	0.415	0.195	8.91e-116	0
Naca	5.93e-120	-0.333109	0.991	0.998	9.82e-116	0
4930523C07Rik	1.32e-119	0.371144	0.612	0.354	2.19e-115	0
Rbbp8	2.91e-119	0.33685	0.491	0.254	4.83e-115	0
Cks1b	7.49e-119	0.354412	0.644	0.372	1.24e-114	0
Tk1	1.76e-118	0.31989	0.471	0.235	2.92e-114	0
Cdk5rap2	4.56e-118	0.291988	0.378	0.169	7.55e-114	0
Terf1	5.98e-118	0.348832	0.493	0.259	9.9e-114	0
Rpl30	1.51e-117	-0.255001	0.999	1	2.5e-113	0
Ctdspl2	5.8e-117	0.343422	0.56	0.313	9.61e-113	0
Smc5	2.4e-116	0.333284	0.511	0.272	3.98e-112	0
Ptma	7.86e-116	0.326064	1	0.999	1.3e-111	0
Hnrnpul1	5.67e-115	0.363654	0.656	0.41	9.4e-111	0
Rgs3	1.67e-114	0.320083	0.413	0.199	2.77e-110	0
Mef2a	3.03e-114	0.399003	0.704	0.464	5.03e-110	0
Crip1	2.75e-113	0.374005	0.985	0.953	4.56e-109	0
Ankrd11	1.9e-112	0.359451	0.934	0.855	3.15e-108	0
Rad51	2.33e-112	0.312067	0.461	0.235	3.85e-108	0
Dtl	9.32e-111	0.346657	0.566	0.315	1.54e-106	0
Atp10a	1.14e-110	0.398878	0.73	0.504	1.88e-106	0
Brca2	4.78e-110	0.259337	0.321	0.136	7.92e-106	0
Cenpk	1.34e-109	0.30087	0.386	0.182	2.21e-105	0
Spidr	1.93e-109	0.335862	0.546	0.305	3.2e-105	0
Topbp1	2.23e-109	0.343093	0.597	0.35	3.7e-105	0
Sod1	2.9e-109	0.349721	0.587	0.347	4.8e-105	0
E130307A14Rik	3.72e-109	0.273337	0.311	0.129	6.16e-105	0
Stag2	5.34e-109	0.347853	0.634	0.387	8.85e-105	0
Myef2	1.89e-108	0.283177	0.378	0.176	3.13e-104	0
Mphosph9	3.86e-108	0.27754	0.394	0.186	6.39e-104	0
Atp2b4	2.52e-107	0.311302	0.482	0.256	4.17e-103	0
Pcna	3.85e-107	0.39521	0.71	0.472	6.38e-103	0
Apobec3	8.26e-107	0.375011	0.825	0.632	1.37e-102	0
Csrp1	9.89e-107	0.324029	0.501	0.273	1.64e-102	0
Kansl1l	1.91e-106	0.261494	0.288	0.116	3.16e-102	0
Slbp	5.9e-106	0.421827	0.765	0.559	9.77e-102	0
Tbl1xr1	1.91e-105	0.387062	0.7	0.473	3.16e-101	0
Dck	2.98e-105	0.286794	0.378	0.179	4.94e-101	0
Skap1	3.28e-105	0.305346	0.998	0.974	5.44e-101	0
Tcf19	9.68e-105	0.266765	0.355	0.161	1.61e-100	0
Zranb3	1.1e-104	0.254482	0.282	0.113	1.83e-100	0
Aak1	1.13e-104	0.380375	0.791	0.584	1.88e-100	0
Numa1	2.68e-104	0.322499	0.529	0.299	4.44e-100	0
Fmr1	2.8e-104	0.296563	0.472	0.249	4.63e-100	0
Srsf4	1.1e-103	0.332829	0.551	0.319	1.82e-99	0
Gabpb2	9.15e-102	0.308205	0.54	0.307	1.52e-97	0
Cenph	9.23e-102	0.291943	0.412	0.206	1.53e-97	0
BC052040	1.26e-101	0.291127	0.377	0.181	2.09e-97	0
Fry	1.2e-100	0.283442	0.319	0.14	1.98e-96	0
Rttn	1.51e-100	0.266547	0.355	0.164	2.51e-96	0
Srbd1	1.68e-100	0.277772	0.408	0.204	2.79e-96	0
Pmf1	2.45e-99	0.294614	0.464	0.25	4.05e-95	0
Rad18	5.47e-99	0.270623	0.415	0.208	9.06e-95	0
Themis	9.26e-99	0.364562	0.982	0.963	1.53e-94	0
Taf1	9.88e-98	0.315851	0.512	0.291	1.64e-93	0
Kmt5a	1.46e-97	0.307251	0.548	0.32	2.42e-93	0
Eri1	1.68e-97	0.299056	0.475	0.262	2.79e-93	0
Hp1bp3	1.19e-95	0.366274	0.731	0.519	1.97e-91	0
Luc7l2	1.78e-95	0.317017	0.952	0.891	2.94e-91	0
Uhrf1	2.49e-95	0.307098	0.554	0.322	4.12e-91	0
Ccdc82	1.12e-94	0.263018	0.411	0.21	1.86e-90	0
Ppp6r3	1.15e-94	0.300611	0.507	0.289	1.91e-90	0
Sun2	1.29e-94	0.27304	0.391	0.196	2.14e-90	0
Pias1	1.48e-94	0.305396	0.567	0.338	2.46e-90	0
Ankrd44	1.52e-93	0.348761	0.955	0.89	2.51e-89	0
Hirip3	3.43e-93	0.272658	0.389	0.196	5.69e-89	0
Pds5a	4.15e-92	0.341438	0.709	0.493	6.88e-88	0
Mms22l	4.29e-92	0.296828	0.513	0.294	7.11e-88	0
Smg6	7.23e-92	0.406158	0.76	0.572	1.2e-87	0
Prkce	3.56e-91	0.281119	0.415	0.215	5.9e-87	0
Mbnl1	5.81e-91	0.302257	0.987	0.958	9.63e-87	0
H3f3b	8.14e-91	0.278389	0.998	0.991	1.35e-86	0
Prim2	6.43e-90	0.285769	0.474	0.264	1.07e-85	0
Pds5b	3.27e-89	0.304964	0.541	0.327	5.41e-85	0
Il18rap	8.46e-89	0.294755	0.449	0.244	1.4e-84	0
Hnrnpul2	2.41e-88	0.306566	0.527	0.315	3.99e-84	0
Sp4	3.06e-88	0.261363	0.39	0.197	5.08e-84	0
Fut8	3.07e-88	0.311371	0.501	0.289	5.1e-84	0
Smc6	3.28e-88	0.338981	0.691	0.477	5.44e-84	0
Taf15	7.1e-88	0.309106	0.604	0.383	1.18e-83	0
Smarcc2	4.18e-87	0.275296	0.505	0.291	6.93e-83	0
Cep192	3.13e-86	0.270332	0.486	0.277	5.19e-82	0
Arid1a	4.12e-86	0.29258	0.593	0.369	6.82e-82	0
Hmgb3	1.6e-85	0.253543	0.417	0.222	2.66e-81	0
Pde3b	2.79e-85	0.336317	0.888	0.755	4.62e-81	0
Runx1	3.64e-85	0.320214	0.389	0.204	6.03e-81	0
Cnot1	4.49e-84	0.29339	0.654	0.429	7.44e-80	0
Actn4	5.89e-84	0.311003	0.645	0.431	9.76e-80	0
AW554918	7e-84	0.305772	0.53	0.32	1.16e-79	0
Plcl2	8.32e-84	0.301993	0.662	0.437	1.38e-79	0
Ccnd2	1.04e-83	-0.431945	0.587	0.751	1.73e-79	0
Arhgap18	1.72e-83	0.30653	0.58	0.362	2.86e-79	0
Fryl	4.98e-83	0.304755	0.601	0.383	8.25e-79	0
Sp3	9.91e-83	0.262226	0.469	0.265	1.64e-78	0
Wnk1	1.14e-82	0.32787	0.941	0.89	1.89e-78	0
Hnrnpa2b1	1.25e-82	0.318691	0.943	0.89	2.07e-78	0
Hnrnpu	1.39e-82	0.307874	0.926	0.836	2.31e-78	0
Eif5a	1.87e-82	-0.439159	0.903	0.957	3.11e-78	0
Kat7	2.37e-82	0.278403	0.509	0.303	3.94e-78	0
Wdr76	3.19e-81	0.25458	0.416	0.225	5.28e-77	0
Thrap3	1.83e-79	0.329608	0.801	0.642	3.03e-75	0
Smc3	2.5e-79	0.326156	0.666	0.465	4.15e-75	0
Sesn1	3.38e-79	0.250929	0.385	0.203	5.6e-75	0
Zfp91	3.41e-78	0.306497	0.647	0.44	5.65e-74	0
Suco	3.56e-77	0.26138	0.503	0.3	5.9e-73	0
Tab2	3.8e-77	0.287842	0.566	0.359	6.29e-73	0
Rfx3	5.34e-77	0.263508	0.457	0.26	8.85e-73	0
Dpysl2	6.19e-77	0.265948	0.488	0.29	1.03e-72	0
Cep350	7.36e-77	0.257967	0.498	0.294	1.22e-72	0
Spag9	1.03e-76	0.298978	0.708	0.51	1.71e-72	0
Phip	1.08e-75	0.274547	0.585	0.376	1.79e-71	0
4932438A13Rik	1.94e-75	0.254416	0.586	0.368	3.22e-71	0
Nsmce2	2.09e-75	0.302446	0.633	0.429	3.46e-71	0
Sipa1l1	2.13e-75	0.313405	0.755	0.574	3.54e-71	0
Pitpnc1	2.95e-75	0.293065	0.952	0.872	4.89e-71	0
Spn	4e-75	0.266166	0.486	0.292	6.63e-71	0
Clic4	4.08e-75	0.262295	0.449	0.26	6.77e-71	0
Nr3c1	1.07e-74	0.259653	0.496	0.298	1.78e-70	0
Anapc5	1.18e-74	0.288492	0.702	0.495	1.96e-70	0
Mllt3	1.74e-74	0.31592	0.72	0.526	2.88e-70	0
Fnip1	2.76e-74	0.252817	0.542	0.334	4.57e-70	0
Faf1	3.02e-74	0.288681	0.622	0.412	5e-70	0
Lrch1	7.67e-74	0.280055	0.572	0.363	1.27e-69	0
Rock2	9.39e-74	0.269163	0.532	0.328	1.56e-69	0
Fndc3a	2.75e-73	0.402338	0.864	0.781	4.56e-69	0
Map4	4.18e-73	0.286209	0.589	0.386	6.92e-69	0
Exoc4	6.41e-73	0.372073	0.883	0.8	1.06e-68	0
Mcph1	6.73e-73	0.256097	0.426	0.244	1.11e-68	0
Zfp148	1.6e-72	0.266272	0.636	0.424	2.66e-68	0
Nr2c2	2.75e-71	0.259031	0.481	0.288	4.56e-67	0
Esyt2	5.88e-71	0.293719	0.731	0.543	9.74e-67	0
Ptbp3	6.59e-71	0.302687	0.742	0.562	1.09e-66	0
Agps	8.25e-70	0.265193	0.557	0.359	1.37e-65	0
Npm1	1.39e-69	-0.323405	0.996	0.998	2.31e-65	0
Vps13b	2.02e-69	0.270144	0.701	0.506	3.35e-65	0
Rfc1	3.04e-69	0.26579	0.585	0.378	5.04e-65	0
Wwox	3.71e-69	0.334262	0.59	0.394	6.14e-65	0
Gpr141	4.4e-69	0.358738	0.629	0.449	7.3e-65	0
Fnbp1	4.78e-69	0.287239	0.886	0.804	7.92e-65	0
Hip1	5.94e-69	0.307383	0.537	0.338	9.84e-65	0
Lig1	6.73e-69	0.279893	0.603	0.397	1.11e-64	0
Rbbp4	9.6e-69	0.296309	0.738	0.565	1.59e-64	0
Eif4a1	1.99e-68	-0.356075	0.913	0.953	3.3e-64	0
Zfp638	2.61e-68	0.276226	0.56	0.364	4.33e-64	0
Psip1	6.46e-68	0.281058	0.63	0.436	1.07e-63	0
Elf4	1.07e-67	0.259534	0.579	0.377	1.77e-63	0
Rps6ka3	2.44e-67	0.268609	0.686	0.481	4.04e-63	0
Nasp	2.72e-67	0.280096	0.84	0.666	4.5e-63	0
Fus	3.33e-67	0.305977	0.837	0.723	5.52e-63	0
Vrk2	7.32e-67	0.26623	0.48	0.298	1.21e-62	0
Ikzf1	8.58e-67	0.301008	0.9	0.825	1.42e-62	0
Dnajc9	8.61e-67	0.261591	0.579	0.384	1.43e-62	0
Ccni	3.47e-66	0.251137	0.554	0.36	5.76e-62	0
Cbx1	3.57e-66	0.265688	0.545	0.355	5.91e-62	0
Creb1	8.47e-66	0.253467	0.489	0.302	1.4e-61	0
Nup210	1.45e-65	0.260087	0.524	0.338	2.41e-61	0
Hspe1	6.95e-65	-0.330343	0.748	0.862	1.15e-60	0
Zbtb20	7.23e-65	0.281789	0.806	0.639	1.2e-60	0
Lims1	2.35e-64	0.265548	0.646	0.449	3.9e-60	0
Arid1b	7.49e-64	0.263214	0.594	0.4	1.24e-59	0
Phf20l1	1.18e-63	0.267125	0.717	0.531	1.95e-59	0
Arhgap26	1.22e-63	0.26303	0.539	0.346	2.02e-59	0
Tnrc6c	1.42e-63	0.250583	0.596	0.396	2.35e-59	0
Mapre1	1.62e-63	0.250275	0.574	0.38	2.68e-59	0
Hpf1	2.61e-63	0.25901	0.621	0.424	4.32e-59	0
Scaf11	3.51e-63	0.278597	0.657	0.472	5.82e-59	0
Zeb1	4.56e-63	0.279148	0.676	0.492	7.56e-59	0
Brd4	7.15e-63	0.270646	0.76	0.587	1.19e-58	0
Il18r1	2.23e-62	0.295186	0.482	0.305	3.69e-58	0
Tnfaip8	2.26e-62	0.283142	0.704	0.522	3.74e-58	0
Iqgap1	2.6e-62	0.26896	0.809	0.657	4.31e-58	0
Usp15	2.64e-62	0.282971	0.724	0.555	4.38e-58	0
Grap2	5.37e-62	0.278977	0.922	0.871	8.9e-58	0
Dock11	2.74e-61	0.267194	0.67	0.483	4.54e-57	0
Gsk3b	4.72e-61	0.268641	0.674	0.493	7.82e-57	0
Oxct1	7.62e-61	0.258843	0.588	0.4	1.26e-56	0
Ssrp1	1.14e-60	0.258554	0.736	0.55	1.89e-56	0
Jpt1	8.21e-60	0.27957	0.861	0.763	1.36e-55	0
Celf2	2.56e-59	0.262046	0.944	0.907	4.24e-55	0
Arl15	1.72e-58	0.260987	0.552	0.368	2.85e-54	0
Dock2	1.09e-57	0.251795	0.969	0.915	1.8e-53	0
Rbbp7	6.74e-57	0.25394	0.645	0.464	1.12e-52	0
Plxdc2	4.8e-56	0.3123	0.578	0.408	7.96e-52	0
Sf3b2	8.37e-56	0.257258	0.859	0.768	1.39e-51	0
Maml2	1.6e-55	0.257879	0.813	0.668	2.65e-51	0
Nme1	7.34e-55	-0.347546	0.713	0.812	1.22e-50	0
Rcsd1	1.02e-54	0.251697	0.598	0.42	1.68e-50	0
Aprt	5.15e-54	-0.323618	0.529	0.655	8.53e-50	0
Rsrc1	6.51e-54	0.255681	0.713	0.548	1.08e-49	0
C1qbp	9.87e-54	-0.365932	0.365	0.501	1.64e-49	0
Dock8	1.05e-53	0.275923	0.857	0.772	1.74e-49	0
Hnrnpd	1.3e-53	0.260631	0.832	0.728	2.16e-49	0
Jund	4.62e-53	-0.299313	0.911	0.968	7.66e-49	0
Chd4	3.05e-52	0.265668	0.77	0.633	5.06e-48	0
Tomm20	6.24e-51	-0.293421	0.652	0.755	1.03e-46	0
Sfpq	4.34e-50	0.262629	0.828	0.726	7.2e-46	0
Slco3a1	9e-50	0.331153	0.667	0.525	1.49e-45	0
Ssbp2	5.42e-49	0.25325	0.776	0.634	8.99e-45	0
Ralgapa2	2.95e-48	0.252563	0.616	0.459	4.89e-44	0
Tap1	2.02e-47	0.251144	0.713	0.568	3.34e-43	0
Gas5	6.88e-46	-0.285741	0.818	0.901	1.14e-41	0
Lrrc8c	7.22e-46	0.25987	0.793	0.684	1.2e-41	0
Srm	1.38e-45	-0.281666	0.127	0.26	2.29e-41	0
Ccnd3	9.88e-45	-0.363146	0.667	0.762	1.64e-40	0
Psmb3	1.72e-44	-0.280588	0.795	0.867	2.85e-40	0
Dad1	1.43e-43	-0.278768	0.57	0.671	2.37e-39	0
Lsm7	9.12e-43	-0.297208	0.528	0.64	1.51e-38	0
Inpp4b	6.42e-41	0.257191	0.958	0.938	1.06e-36	0
Atp5g1	1.81e-39	-0.275364	0.653	0.746	3e-35	0
Ptprcap	2.48e-39	-0.259018	0.693	0.784	4.11e-35	0
Hspd1	1.4e-37	-0.378728	0.571	0.65	2.33e-33	0
Phb2	1.8e-36	-0.276721	0.432	0.541	2.98e-32	0
Ftl1	2.79e-36	-0.292812	0.905	0.949	4.63e-32	0
Plac8	7.04e-33	-0.28926	0.75	0.85	1.17e-28	0
Ybx3	1.67e-32	-0.277519	0.656	0.736	2.76e-28	0
Fbl	1.89e-30	-0.251146	0.506	0.596	3.13e-26	0
Nkg7	2.72e-29	-0.27646	0.917	0.936	4.51e-25	0
Itgb1	3.82e-29	0.264376	0.585	0.463	6.32e-25	0
Calr	8.17e-29	-0.274511	0.808	0.881	1.35e-24	0
Tomm5	3.64e-28	-0.262582	0.321	0.419	6.04e-24	0
Fabp5	7.76e-23	-0.299527	0.412	0.485	1.29e-18	0
Rps27l	1.64e-22	-0.257777	0.832	0.869	2.72e-18	0
Nolc1	2.94e-22	-0.265891	0.289	0.371	4.88e-18	0
Ltb	6.53e-20	-0.263576	0.591	0.652	1.08e-15	0
Gzmb	2.79e-18	-0.530506	0.951	0.963	4.62e-14	0
Tnfrsf9	6.4e-11	-0.257293	0.541	0.579	1.06e-06	0
Lgals3	4.13e-07	-0.374406	0.679	0.697	0.00683969	0
Pclaf	0	1.0707	0.977	0.675	0	1
Stmn1	0	0.99749	0.996	0.793	0	1
Rrm2	0	0.821903	0.817	0.355	0	1
Dut	0	0.819814	0.988	0.794	0	1
Ptma	0	0.771093	1	0.999	0	1
Tyms	0	0.745757	0.794	0.347	0	1
Tubb5	0	0.735589	0.999	0.971	0	1
H2afz	0	0.729121	0.999	0.935	0	1
Slbp	0	0.727776	0.903	0.543	0	1
Lig1	0	0.672895	0.787	0.376	0	1
Clspn	0	0.657872	0.807	0.365	0	1
Esco2	0	0.597103	0.594	0.191	0	1
Asf1b	0	0.567153	0.629	0.233	0	1
Ppia	0	0.531569	1	1	0	1
Tuba1b	9.62e-296	0.708195	0.98	0.8	1.59e-291	1
Hist1h1b	2.36e-291	0.713791	0.848	0.429	3.91e-287	1
Fbxo5	4.56e-288	0.529435	0.631	0.24	7.55e-284	1
Hmgb2	1.55e-286	0.685776	0.998	0.949	2.57e-282	1
Nusap1	1.78e-284	0.657551	0.805	0.379	2.96e-280	1
Hist1h2ap	8.49e-281	0.716188	0.799	0.398	1.41e-276	1
Top2a	2.75e-279	0.696035	0.974	0.692	4.55e-275	1
Dek	1.69e-269	0.624081	0.963	0.764	2.8e-265	1
Tk1	2.39e-268	0.528849	0.576	0.224	3.96e-264	1
Ranbp1	8.93e-261	0.618906	0.959	0.783	1.48e-256	1
Smc2	5.46e-260	0.599656	0.874	0.492	9.04e-256	1
Pcna	9.87e-257	0.595913	0.824	0.459	1.64e-252	1
Gmnn	3.02e-256	0.575942	0.814	0.442	5.01e-252	1
Hmgb1	7.55e-253	0.54703	0.999	0.953	1.25e-248	1
Birc5	2.49e-243	0.611265	0.823	0.449	4.13e-239	1
Tcf19	1.21e-242	0.422053	0.453	0.15	2e-238	1
Zfp367	1.64e-239	0.498545	0.663	0.291	2.72e-235	1
Siva1	4.35e-233	0.574129	0.796	0.459	7.22e-229	1
Inpp4b	6.96e-233	-0.854222	0.842	0.954	1.15e-228	1
Sumo2	2.87e-230	0.521452	0.972	0.891	4.75e-226	1
Tipin	1.6e-228	0.536355	0.756	0.404	2.66e-224	1
Ccne1	4.22e-227	0.433609	0.472	0.169	7e-223	1
Spc24	1.51e-226	0.49205	0.627	0.279	2.49e-222	1
Prdx1	1.07e-224	0.567184	0.977	0.906	1.77e-220	1
Nasp	1.37e-218	0.564574	0.915	0.657	2.26e-214	1
Txn1	2.17e-218	0.497712	0.996	0.966	3.59e-214	1
Alyref	2.59e-214	0.556911	0.878	0.6	4.29e-210	1
Neil3	1.33e-211	0.42001	0.563	0.226	2.2e-207	1
Orc6	3.41e-211	0.485426	0.663	0.319	5.66e-207	1
Mcm7	3.39e-210	0.520154	0.768	0.426	5.61e-206	1
Uhrf1	8.89e-210	0.475059	0.656	0.311	1.47e-205	1
Spc25	1.64e-209	0.421699	0.519	0.203	2.72e-205	1
Ran	1.66e-209	0.499979	0.985	0.891	2.74e-205	1
Rad51	8.21e-207	0.421634	0.545	0.226	1.36e-202	1
Tagln2	1.81e-206	0.498529	0.993	0.935	3e-202	1
Pfn1	2.68e-204	0.436177	1	0.998	4.45e-200	1
Cdk1	7.49e-204	0.444233	0.632	0.281	1.24e-199	1
Dctpp1	1.02e-202	0.486463	0.664	0.333	1.69e-198	1
Themis	1.31e-202	-0.724747	0.926	0.971	2.18e-198	1
Lsm2	6.36e-201	0.506118	0.722	0.398	1.05e-196	1
Aurkb	2.94e-200	0.392941	0.475	0.181	4.87e-196	1
Rbm3	1.67e-198	0.404142	0.999	0.993	2.77e-194	1
Rrm1	5.42e-197	0.484544	0.758	0.414	8.99e-193	1
Tubb4b	2.89e-196	0.52473	0.917	0.673	4.79e-192	1
Kif15	1.51e-192	0.461852	0.734	0.381	2.51e-188	1
Cenph	1.95e-192	0.388607	0.493	0.198	3.24e-188	1
Prim1	3.06e-192	0.399087	0.524	0.22	5.08e-188	1
H3f3b	2.59e-186	0.474495	0.998	0.991	4.3e-182	1
Pbk	6.63e-184	0.344634	0.374	0.127	1.1e-179	1
Cdk4	1.26e-182	0.475428	0.752	0.437	2.09e-178	1
Snrpd1	6.17e-182	0.487873	0.951	0.794	1.02e-177	1
Arhgap15	1.57e-180	-0.729147	0.853	0.932	2.61e-176	1
Srsf3	3.9e-178	0.470326	0.962	0.835	6.46e-174	1
Dtymk	2.49e-177	0.455742	0.669	0.353	4.12e-173	1
Snrpe	6.21e-177	0.415586	0.988	0.957	1.03e-172	1
Syce2	3.75e-176	0.42415	0.6	0.29	6.21e-172	1
Nap1l1	5.85e-176	0.448847	0.967	0.853	9.7e-172	1
Ezh2	5.91e-176	0.476781	0.808	0.497	9.8e-172	1
Ybx1	7.85e-176	0.416731	0.999	0.974	1.3e-171	1
Rad51ap1	9.98e-174	0.363735	0.417	0.16	1.65e-169	1
Ccna2	6.2e-173	0.40693	0.585	0.268	1.03e-168	1
Kif11	1.97e-172	0.400851	0.706	0.349	3.26e-168	1
Tmpo	9.86e-172	0.483777	0.849	0.574	1.63e-167	1
Hint1	6.12e-171	0.412688	0.991	0.947	1.01e-166	1
1810037I17Rik	1.04e-168	0.502649	0.838	0.6	1.72e-164	1
Atad2	6.02e-168	0.480553	0.771	0.458	9.97e-164	1
Dtl	1.19e-164	0.411847	0.624	0.31	1.97e-160	1
Anp32b	3.09e-163	0.411185	0.99	0.936	5.11e-159	1
Fen1	4.04e-163	0.350325	0.478	0.205	6.69e-159	1
E2f7	2.36e-162	0.337494	0.411	0.158	3.91e-158	1
Snrpg	4.28e-160	0.361949	0.999	0.988	7.09e-156	1
Cenpk	4.48e-160	0.345896	0.435	0.177	7.42e-156	1
Ndc80	1.56e-159	0.365066	0.511	0.226	2.58e-155	1
Mbnl1	8.68e-159	-0.571765	0.908	0.968	1.44e-154	1
Rfc3	8.99e-159	0.383296	0.516	0.236	1.49e-154	1
Cdca3	2.81e-158	0.405429	0.569	0.273	4.66e-154	1
Dhfr	3.39e-158	0.361933	0.453	0.192	5.62e-154	1
Mcm5	3.4e-157	0.402946	0.651	0.342	5.63e-153	1
Ncapg2	9.21e-157	0.37228	0.564	0.265	1.53e-152	1
Ywhah	1.89e-156	0.462942	0.888	0.683	3.13e-152	1
Ptprc	2.86e-156	-0.534889	0.92	0.972	4.74e-152	1
Cdca8	6.62e-156	0.41356	0.68	0.36	1.1e-151	1
Rplp0	7.34e-156	0.250143	1	1	1.22e-151	1
Cenpp	7.72e-156	0.368572	0.565	0.262	1.28e-151	1
Dnajc9	9.24e-156	0.423129	0.672	0.374	1.53e-151	1
E2f8	9.34e-156	0.291475	0.327	0.111	1.55e-151	1
Incenp	2.35e-155	0.397633	0.715	0.382	3.89e-151	1
Malat1	2.47e-155	-0.555719	1	0.997	4.09e-151	1
Eef1a1	7.5e-155	0.259624	1	1	1.24e-150	1
Crip1	4.83e-153	0.506751	0.981	0.954	8.01e-149	1
Cks1b	1.21e-152	0.398503	0.685	0.37	2.01e-148	1
Mxd3	3.34e-151	0.318781	0.358	0.132	5.54e-147	1
Brip1	5.9e-151	0.358544	0.532	0.246	9.78e-147	1
Rfc2	7.17e-151	0.398965	0.639	0.343	1.19e-146	1
H2afx	1e-150	0.402506	0.741	0.43	1.66e-146	1
Atad5	2.95e-150	0.352738	0.509	0.233	4.88e-146	1
Cenpw	6.86e-150	0.401717	0.584	0.301	1.14e-145	1
Fabp5	1.35e-148	0.439035	0.743	0.442	2.24e-144	1
Ncapd3	2.09e-148	0.364218	0.624	0.32	3.47e-144	1
Ube2s	2.92e-147	0.459656	0.916	0.727	4.85e-143	1
Cdca5	3.54e-147	0.288219	0.329	0.116	5.87e-143	1
Diaph3	2.93e-146	0.394811	0.758	0.432	4.86e-142	1
Dck	2.14e-145	0.323668	0.42	0.176	3.54e-141	1
Dnmt1	3.54e-145	0.41023	0.715	0.418	5.87e-141	1
Nelfe	5.23e-145	0.3592	0.477	0.22	8.67e-141	1
Rfc4	6.99e-145	0.345335	0.463	0.208	1.16e-140	1
Rpa3	3.16e-144	0.348575	0.449	0.2	5.23e-140	1
Ppil1	3.56e-144	0.3714	0.532	0.262	5.91e-140	1
Cdc45	5.57e-144	0.314227	0.388	0.156	9.23e-140	1
Nme2	8.63e-143	0.342434	0.999	0.994	1.43e-138	1
Prc1	8.46e-142	0.338155	0.654	0.329	1.4e-137	1
Eif5a	8.88e-142	0.402569	0.987	0.946	1.47e-137	1
Haus4	1.39e-141	0.350117	0.488	0.228	2.31e-137	1
Rpl14	8.38e-141	0.257128	1	1	1.39e-136	1
Racgap1	1.05e-139	0.364527	0.592	0.3	1.75e-135	1
Rps2	1.26e-139	0.251776	1	1	2.09e-135	1
Cmc2	2.3e-139	0.359597	0.518	0.252	3.82e-135	1
Ldha	3.11e-138	0.364956	0.997	0.99	5.16e-134	1
Cfl1	2.31e-137	0.356176	0.997	0.985	3.82e-133	1
Ankrd44	3.5e-137	-0.535787	0.802	0.911	5.8e-133	1
Sgo1	2.96e-136	0.31041	0.442	0.193	4.9e-132	1
Pold2	4.45e-135	0.329831	0.474	0.221	7.37e-131	1
Rfwd3	1.41e-132	0.355086	0.567	0.291	2.33e-128	1
Mki67	3.27e-132	0.341042	0.804	0.479	5.42e-128	1
Dock2	4.67e-132	-0.528685	0.843	0.932	7.74e-128	1
Cox8a	6.41e-132	0.323078	0.998	0.993	1.06e-127	1
Nxt1	2.72e-131	0.322765	0.428	0.193	4.5e-127	1
Shcbp1	5.64e-131	0.303787	0.438	0.194	9.35e-127	1
Cenps	9.48e-131	0.265284	0.338	0.129	1.57e-126	1
Mcm3	1.31e-130	0.403245	0.783	0.499	2.18e-126	1
Actb	3.4e-130	0.321549	1	1	5.64e-126	1
Mif	3.91e-130	0.345807	0.998	0.993	6.49e-126	1
Cox5a	4.25e-130	0.348746	0.993	0.966	7.04e-126	1
Oaz1	4.85e-130	0.318004	0.999	0.992	8.03e-126	1
Actg1	1.7e-129	0.335385	1	1	2.82e-125	1
Mcm6	7.45e-129	0.382557	0.717	0.427	1.23e-124	1
Tubg1	1.84e-128	0.302571	0.381	0.161	3.05e-124	1
Cks2	7.92e-128	0.382134	0.765	0.48	1.31e-123	1
Gltp	1.07e-127	0.356518	0.54	0.283	1.78e-123	1
Ccne2	6.28e-125	0.26048	0.31	0.115	1.04e-120	1
Dennd4a	1.01e-124	-0.610543	0.713	0.854	1.68e-120	1
Cenpm	1.93e-124	0.301927	0.42	0.19	3.21e-120	1
Hist1h1e	1.95e-124	0.332559	0.539	0.266	3.23e-120	1
Hsp90aa1	3.29e-124	0.385329	0.971	0.902	5.46e-120	1
Lsm8	1.76e-123	0.370397	0.6	0.339	2.92e-119	1
Hpf1	3.06e-123	0.378715	0.683	0.418	5.07e-119	1
Gm42418	1.22e-122	-0.60244	0.953	0.981	2.02e-118	1
Ncapg	1.18e-121	0.307982	0.439	0.204	1.95e-117	1
Lsm3	3.34e-121	0.328894	0.557	0.296	5.54e-117	1
Dpy30	7.3e-120	0.353771	0.629	0.36	1.21e-115	1
Mrpl42	8.41e-120	0.358135	0.63	0.364	1.39e-115	1
Mrpl18	1.02e-119	0.392362	0.757	0.501	1.7e-115	1
Rbbp4	1.24e-119	0.401152	0.793	0.56	2.06e-115	1
Pde3b	6.1e-119	-0.628156	0.638	0.788	1.01e-114	1
Gins2	8.28e-119	0.284442	0.353	0.148	1.37e-114	1
Srsf7	1.11e-118	0.387747	0.881	0.68	1.84e-114	1
Hmgn2	2.42e-118	0.374725	0.677	0.41	4.01e-114	1
Kntc1	2.05e-117	0.275764	0.371	0.158	3.4e-113	1
Pitpnc1	4.88e-117	-0.557618	0.79	0.894	8.09e-113	1
Csrp1	4.16e-116	0.34278	0.518	0.273	6.89e-112	1
Kif22	4.24e-116	0.294751	0.419	0.193	7.02e-112	1
Slc25a5	7.39e-116	0.369232	0.932	0.805	1.22e-111	1
H3f3a	1.83e-115	0.343191	0.989	0.965	3.04e-111	1
Tmsb4x	7.42e-115	0.269743	1	1	1.23e-110	1
H2afv	7.92e-115	0.450809	0.855	0.683	1.31e-110	1
Ncaph	1.8e-114	0.267206	0.341	0.141	2.99e-110	1
Ccdc34	2.13e-114	0.332308	0.441	0.215	3.53e-110	1
Tacc3	2.95e-114	0.319967	0.514	0.263	4.89e-110	1
Rfc5	1.07e-113	0.298661	0.414	0.195	1.77e-109	1
Brca1	2.45e-113	0.288278	0.442	0.208	4.07e-109	1
Hsp90ab1	2.74e-113	0.270984	1	1	4.55e-109	1
Tuba4a	3.16e-113	0.388043	0.714	0.455	5.23e-109	1
Cenpx	4.25e-113	0.347126	0.625	0.366	7.04e-109	1
Melk	5.29e-113	0.253478	0.321	0.129	8.76e-109	1
Lmnb1	5.9e-113	0.348239	0.774	0.486	9.79e-109	1
Cycs	7.94e-113	0.354082	0.688	0.422	1.32e-108	1
Akap13	9.19e-113	-0.514512	0.776	0.885	1.52e-108	1
Tpx2	1.89e-112	0.321755	0.626	0.344	3.13e-108	1
Atp5j	1.39e-111	0.35608	0.947	0.859	2.3e-107	1
Paics	6.63e-111	0.342439	0.613	0.355	1.1e-106	1
Cblb	1.51e-110	-0.522743	0.589	0.774	2.5e-106	1
Cdkn2c	1.67e-110	0.288182	0.368	0.163	2.77e-106	1
Wdr76	1.65e-109	0.302037	0.451	0.222	2.74e-105	1
Nsmce4a	6.14e-109	0.347462	0.636	0.38	1.02e-104	1
Hnrnpab	1e-108	0.378797	0.905	0.742	1.66e-104	1
Knl1	2.37e-108	0.273207	0.503	0.25	3.93e-104	1
Snrpf	3.53e-108	0.350276	0.96	0.872	5.86e-104	1
E2f1	3.95e-108	0.269959	0.364	0.161	6.55e-104	1
Fth1	4.59e-108	0.330895	0.997	0.993	7.61e-104	1
Dbi	7.36e-108	0.371993	0.869	0.683	1.22e-103	1
Kif4	8.28e-108	0.27267	0.476	0.233	1.37e-103	1
Anapc11	9.13e-108	0.382926	0.774	0.546	1.51e-103	1
Foxp1	1.19e-107	-0.609526	0.663	0.806	1.98e-103	1
Rbbp7	5.84e-107	0.345464	0.717	0.457	9.68e-103	1
Rpa2	1.73e-106	0.298815	0.467	0.237	2.86e-102	1
Pmf1	3.29e-106	0.307383	0.48	0.249	5.45e-102	1
Topbp1	5.56e-106	0.321287	0.608	0.351	9.22e-102	1
Nudc	7.41e-106	0.336518	0.691	0.429	1.23e-101	1
Hnrnpf	1.09e-105	0.334597	0.972	0.931	1.8e-101	1
Snrpd2	2.34e-105	0.343022	0.962	0.885	3.88e-101	1
Ncapd2	3.46e-105	0.293052	0.49	0.252	5.73e-101	1
Fam111a	1.62e-104	0.3207	0.527	0.289	2.68e-100	1
Itk	4.11e-104	-0.471998	0.82	0.918	6.81e-100	1
Cbx5	1.46e-103	0.31795	0.595	0.34	2.42e-99	1
Tfdp1	3.51e-102	0.30479	0.508	0.276	5.82e-98	1
Ppih	3.87e-102	0.299957	0.496	0.266	6.41e-98	1
Hist1h2ae	4.6e-102	0.272026	0.411	0.193	7.63e-98	1
Rps27l	1.26e-101	0.372934	0.947	0.854	2.09e-97	1
Hat1	5.24e-101	0.316181	0.547	0.307	8.69e-97	1
Rcc1	7.28e-101	0.253484	0.335	0.147	1.21e-96	1
Hells	1.25e-100	0.308084	0.596	0.339	2.07e-96	1
Usp1	1.14e-99	0.310209	0.537	0.301	1.89e-95	1
Mcm4	1.51e-99	0.318009	0.597	0.348	2.51e-95	1
Pola1	1.6e-99	0.312446	0.685	0.413	2.65e-95	1
Cdc6	2.81e-99	0.253536	0.355	0.159	4.66e-95	1
Nme1	3.48e-99	0.359765	0.908	0.786	5.76e-95	1
Sub1	1.8e-98	0.348419	0.98	0.946	2.99e-94	1
Bex3	2.67e-98	0.307668	0.503	0.279	4.42e-94	1
Uqcr10	1.61e-97	0.324046	0.946	0.86	2.66e-93	1
Srsf2	3.71e-97	0.36524	0.834	0.648	6.16e-93	1
Mad2l1	3.77e-97	0.262697	0.374	0.177	6.25e-93	1
Rapgef6	5.72e-97	-0.457619	0.73	0.849	9.48e-93	1
Banf1	1.32e-96	0.34051	0.765	0.536	2.19e-92	1
Pole	4.54e-96	0.272953	0.445	0.227	7.52e-92	1
Ubb	5.71e-96	0.304953	0.998	0.992	9.46e-92	1
Cep128	1.51e-95	0.275472	0.541	0.294	2.5e-91	1
Epsti1	2.09e-95	-0.561168	0.818	0.889	3.47e-91	1
Psmb2	6.62e-95	0.346237	0.928	0.814	1.1e-90	1
Utrn	8.72e-95	-0.534328	0.519	0.678	1.45e-90	1
Cit	1.28e-94	0.257848	0.494	0.258	2.13e-90	1
Cdkn2d	1.65e-94	0.325952	0.539	0.31	2.74e-90	1
Npm1	1.86e-94	0.260985	0.998	0.998	3.07e-90	1
Slc29a1	2.45e-94	0.25637	0.38	0.182	4.06e-90	1
Cdca4	4.01e-94	0.258092	0.401	0.198	6.65e-90	1
Prkch	4.9e-94	-0.520633	0.713	0.828	8.11e-90	1
Calm1	3.51e-93	0.288571	0.998	0.984	5.82e-89	1
Tceal9	4.53e-93	0.259566	0.417	0.211	7.51e-89	1
Nudt5	7.28e-92	0.282057	0.524	0.295	1.21e-87	1
Stub1	7.86e-92	0.280727	0.517	0.292	1.3e-87	1
Mrpl13	9.79e-92	0.299968	0.559	0.329	1.62e-87	1
Magoh	2.35e-91	0.31079	0.685	0.446	3.9e-87	1
Grap2	9.96e-91	-0.459275	0.79	0.888	1.65e-86	1
Chaf1a	4.49e-90	0.250799	0.409	0.206	7.43e-86	1
Maml2	5.77e-90	-0.572747	0.547	0.704	9.56e-86	1
Mrpl51	2.3e-89	0.298123	0.567	0.34	3.82e-85	1
Ppm1h	2.64e-89	-0.520002	0.552	0.711	4.37e-85	1
Ndufa4	5.27e-89	0.395158	0.848	0.707	8.74e-85	1
Txnl1	3.64e-88	0.312573	0.717	0.481	6.03e-84	1
Raly	2.24e-87	0.31395	0.71	0.477	3.71e-83	1
Pole4	4.98e-87	0.294297	0.549	0.327	8.26e-83	1
Tmem14c	1.69e-86	0.293302	0.592	0.362	2.79e-82	1
Elof1	2.79e-86	0.275307	0.497	0.283	4.62e-82	1
Fkbp3	4.17e-86	0.328956	0.842	0.674	6.92e-82	1
Hspa8	6.94e-86	0.263022	0.999	0.993	1.15e-81	1
Uba2	7.81e-86	0.281073	0.548	0.325	1.29e-81	1
Stk39	8.49e-86	-0.463619	0.642	0.784	1.41e-81	1
Ndufab1	1.86e-85	0.283279	0.617	0.377	3.08e-81	1
Rfc1	3.16e-85	0.305196	0.608	0.377	5.24e-81	1
Cisd1	3.28e-85	0.28472	0.55	0.327	5.43e-81	1
Cdkn1a	4.38e-85	0.38607	0.583	0.361	7.27e-81	1
Rabgap1l	9.69e-85	-0.488839	0.565	0.714	1.61e-80	1
Atp5j2	9.81e-85	0.286079	0.981	0.946	1.63e-80	1
Arpp19	1.54e-84	0.322121	0.867	0.714	2.56e-80	1
Smc4	3.18e-84	0.285542	0.924	0.758	5.26e-80	1
Smc3	6.66e-84	0.309073	0.69	0.464	1.1e-79	1
Smc6	6.69e-84	0.303986	0.713	0.476	1.11e-79	1
Hjurp	9.3e-84	0.268051	0.576	0.338	1.54e-79	1
Ssrp1	1.5e-83	0.31446	0.766	0.548	2.49e-79	1
Sptssa	2.74e-83	0.292487	0.592	0.366	4.55e-79	1
Fyb	3.39e-83	-0.461601	0.683	0.804	5.62e-79	1
Eri1	5.71e-83	0.267169	0.473	0.264	9.46e-79	1
Mthfd2	9.55e-83	0.299067	0.572	0.349	1.58e-78	1
Calm2	1.36e-82	0.327273	0.904	0.806	2.26e-78	1
Rad51b	1.61e-82	0.266001	0.757	0.499	2.66e-78	1
Nop10	1.62e-82	0.350215	0.866	0.725	2.68e-78	1
Lockd	3.81e-82	0.279672	0.677	0.434	6.31e-78	1
Hprt	4.44e-82	0.31202	0.728	0.511	7.36e-78	1
Camk4	4.92e-82	-0.46176	0.712	0.835	8.15e-78	1
Impdh2	1.2e-81	0.312981	0.768	0.556	1.99e-77	1
Btg1	1.87e-81	-0.542888	0.405	0.573	3.1e-77	1
Skap1	2.8e-81	-0.392971	0.972	0.978	4.64e-77	1
Pdcd4	3.11e-81	-0.518345	0.399	0.569	5.15e-77	1
Ddx39	4.96e-81	0.284972	0.567	0.342	8.22e-77	1
U2af1	8.42e-81	0.312528	0.81	0.614	1.39e-76	1
Pgk1	1.32e-80	0.281097	0.99	0.978	2.18e-76	1
Psmb3	1.69e-80	0.301723	0.921	0.85	2.8e-76	1
Fli1	2.71e-80	-0.414688	0.669	0.802	4.49e-76	1
Rpa1	4.54e-80	0.274937	0.549	0.329	7.52e-76	1
Aarsd1	1.13e-79	0.2687	0.521	0.307	1.87e-75	1
Anp32e	1.33e-79	0.298369	0.766	0.544	2.21e-75	1
Phf5a	9.05e-79	0.277229	0.603	0.382	1.5e-74	1
Smc1a	1.08e-78	0.306396	0.841	0.661	1.79e-74	1
Nsd2	6.17e-77	0.287554	0.697	0.467	1.02e-72	1
Set	6.6e-77	0.278632	0.957	0.89	1.09e-72	1
Ppp4c	6.9e-77	0.304141	0.662	0.451	1.14e-72	1
Ppp1cc	7.42e-77	0.308831	0.781	0.59	1.23e-72	1
Bcl2	1.41e-76	-0.477599	0.938	0.964	2.34e-72	1
Anapc5	1.17e-75	0.288856	0.721	0.495	1.93e-71	1
Fkbp4	8.98e-75	0.275704	0.552	0.339	1.49e-70	1
Satb1	1.88e-74	-0.477984	0.532	0.674	3.11e-70	1
Ncaph2	1.98e-74	0.256156	0.589	0.365	3.29e-70	1
Uqcrb	3.09e-74	0.281095	0.701	0.488	5.12e-70	1
Sh3kbp1	3.84e-74	-0.422963	0.629	0.753	6.36e-70	1
Selenoh	4.32e-74	0.288006	0.708	0.487	7.16e-70	1
Nsmce1	4.79e-74	0.275412	0.481	0.285	7.93e-70	1
Lsm5	9.97e-74	0.301595	0.831	0.654	1.65e-69	1
Ccnd2	1.52e-73	-0.427299	0.603	0.747	2.52e-69	1
Ptp4a3	1.77e-73	0.315635	0.556	0.355	2.94e-69	1
Lsm6	2.44e-73	0.299832	0.83	0.675	4.05e-69	1
Bola3	2.97e-73	0.258105	0.544	0.334	4.92e-69	1
Bub3	3.33e-73	0.267416	0.723	0.497	5.52e-69	1
Polr2j	3.74e-73	0.251506	0.623	0.396	6.2e-69	1
Dock10	8.06e-73	-0.380369	0.937	0.961	1.34e-68	1
Ndufa5	9.28e-73	0.278942	0.66	0.445	1.54e-68	1
Ndufc2	1.33e-72	0.281538	0.728	0.516	2.2e-68	1
Bcl7c	1.79e-72	0.269554	0.548	0.344	2.96e-68	1
Vdac3	2.16e-72	0.270067	0.582	0.372	3.58e-68	1
Pgp	5.53e-72	0.271863	0.539	0.334	9.16e-68	1
Ssbp2	5.74e-72	-0.537956	0.537	0.666	9.51e-68	1
mt-Co1	1.63e-71	-0.353412	1	0.999	2.7e-67	1
Ddost	2.36e-71	0.270036	0.713	0.491	3.91e-67	1
Atp5g1	5.14e-71	0.307177	0.861	0.718	8.51e-67	1
Erh	9.27e-71	0.27102	0.532	0.331	1.54e-66	1
Lgals1	1.25e-70	0.283288	0.997	0.996	2.07e-66	1
Celf2	1.79e-70	-0.366782	0.848	0.919	2.97e-66	1
Uqcr11	2.82e-70	0.286197	0.861	0.739	4.67e-66	1
Eif4a3	4.28e-70	0.252056	0.543	0.339	7.09e-66	1
Eif1ax	5.15e-70	0.281073	0.694	0.481	8.53e-66	1
Tpm4	9.54e-70	0.297124	0.693	0.487	1.58e-65	1
Ifitm2	1.48e-69	0.402768	0.93	0.873	2.45e-65	1
Erg28	1.56e-69	0.255049	0.489	0.295	2.58e-65	1
Mrpl23	2.34e-69	0.268104	0.637	0.421	3.87e-65	1
Psip1	3.44e-69	0.28313	0.641	0.436	5.7e-65	1
Eny2	4.26e-69	0.279059	0.656	0.448	7.07e-65	1
Exosc8	6.22e-69	0.259188	0.635	0.42	1.03e-64	1
Snu13	7.73e-69	0.283218	0.809	0.624	1.28e-64	1
Tkt	1.32e-68	0.290778	0.868	0.732	2.19e-64	1
Ndufb2	4.12e-68	0.277159	0.617	0.413	6.82e-64	1
Cox7a2	5.08e-68	0.257693	0.955	0.905	8.42e-64	1
Polr2f	6.34e-68	0.252806	0.604	0.388	1.05e-63	1
Sh3bgrl3	1.45e-67	0.254919	0.995	0.991	2.41e-63	1
Sdf2l1	2e-67	0.273912	0.625	0.418	3.31e-63	1
Ndufa12	2.15e-67	0.275096	0.742	0.536	3.57e-63	1
Elmo1	9.45e-67	-0.380698	0.815	0.899	1.57e-62	1
Prkcq	1.21e-66	-0.416296	0.565	0.692	2e-62	1
Psma1	1.25e-66	0.269631	0.704	0.499	2.07e-62	1
Trir	1.7e-66	0.290564	0.763	0.58	2.82e-62	1
Snrnp40	2.66e-66	0.255331	0.562	0.361	4.41e-62	1
Rnaseh2c	4.14e-66	0.258437	0.567	0.364	6.86e-62	1
Pa2g4	9.02e-66	0.265043	0.759	0.551	1.5e-61	1
Rer1	9.3e-66	0.253526	0.643	0.433	1.54e-61	1
Fbl	3.46e-65	0.282924	0.758	0.563	5.73e-61	1
Pgam1	4.4e-65	0.255408	0.958	0.903	7.28e-61	1
Atxn1	5.49e-65	-0.387402	0.79	0.881	9.1e-61	1
Hmgn1	1.14e-64	0.258948	0.347	0.188	1.88e-60	1
Ikzf1	2.47e-64	-0.394377	0.751	0.845	4.1e-60	1
Cox5b	4.98e-64	0.259682	0.947	0.903	8.26e-60	1
Park7	6.51e-64	0.282716	0.887	0.778	1.08e-59	1
Nudt21	8.69e-64	0.269155	0.741	0.548	1.44e-59	1
Fundc2	3.46e-63	0.257897	0.6	0.401	5.74e-59	1
Ddx39b	1.1e-62	0.290168	0.828	0.69	1.83e-58	1
Samhd1	1.14e-62	-0.45354	0.375	0.531	1.89e-58	1
Dok2	1.65e-62	0.250212	0.478	0.293	2.73e-58	1
Rangap1	1.73e-62	0.251887	0.629	0.423	2.87e-58	1
Ltb	2.97e-62	-0.454043	0.514	0.661	4.92e-58	1
Atp5k	3.25e-62	0.272387	0.867	0.738	5.38e-58	1
Mdh1	2.16e-61	0.268082	0.694	0.498	3.57e-57	1
Bax	9.77e-61	0.325577	0.827	0.695	1.62e-56	1
Phb2	1.49e-60	0.257404	0.702	0.505	2.47e-56	1
Hnrnpd	1.61e-60	0.296962	0.845	0.727	2.68e-56	1
Ube2m	7.8e-60	0.256646	0.795	0.624	1.29e-55	1
Cmtm7	1.91e-58	0.289133	0.802	0.647	3.17e-54	1
Krtcap2	2.9e-58	0.256217	0.903	0.806	4.81e-54	1
Fnbp1	1.22e-57	-0.345423	0.726	0.825	2.03e-53	1
Snrpd3	4.17e-57	0.258399	0.779	0.617	6.91e-53	1
Lncpint	6.7e-57	-0.402813	0.307	0.459	1.11e-52	1
Tnrc6b	7.59e-56	-0.400214	0.576	0.681	1.26e-51	1
Ankrd11	1.57e-55	-0.332508	0.805	0.873	2.61e-51	1
Snrpb	1.93e-55	0.25383	0.799	0.624	3.2e-51	1
Mrpl33	4.08e-55	0.257802	0.788	0.628	6.76e-51	1
Stat4	4.27e-55	-0.445442	0.403	0.535	7.08e-51	1
Wnk1	1.92e-54	-0.340669	0.817	0.906	3.19e-50	1
Ndufc1	2.72e-53	0.258143	0.779	0.617	4.51e-49	1
Slco3a1	4.37e-53	-0.449073	0.423	0.558	7.25e-49	1
Ptges3	7.89e-52	0.258288	0.771	0.613	1.31e-47	1
Dock8	1.7e-51	-0.36115	0.704	0.792	2.82e-47	1
Nkg7	1.76e-51	0.2744	0.956	0.93	2.92e-47	1
Dnajc1	5.03e-51	-0.351442	0.594	0.703	8.33e-47	1
S100a4	3.15e-50	0.491086	0.734	0.629	5.23e-46	1
Bach2	5.29e-49	-0.478123	0.368	0.498	8.76e-45	1
Mycbp2	2.33e-46	-0.311167	0.634	0.729	3.86e-42	1
Tcf12	5.61e-46	-0.35894	0.603	0.688	9.3e-42	1
Pik3cd	2.86e-45	-0.317452	0.718	0.798	4.73e-41	1
Kansl1	4.77e-45	-0.316796	0.731	0.812	7.9e-41	1
Ly6c2	1.11e-44	0.392607	0.704	0.58	1.85e-40	1
Cmip	1.42e-44	-0.334304	0.55	0.646	2.36e-40	1
Il12rb2	2.03e-44	-0.378121	0.51	0.624	3.36e-40	1
Zcchc7	7.75e-44	-0.332467	0.504	0.614	1.28e-39	1
Fndc3a	1.05e-43	-0.406714	0.711	0.801	1.73e-39	1
Prrc2c	1.24e-41	-0.272878	0.753	0.83	2.05e-37	1
Macf1	2.37e-41	-0.317587	0.607	0.69	3.92e-37	1
Jarid2	2.61e-41	-0.339251	0.254	0.385	4.33e-37	1
Ablim1	7.3e-41	-0.306905	0.639	0.729	1.21e-36	1
Ogt	8.06e-41	-0.364	0.41	0.518	1.34e-36	1
Phf21a	2.62e-40	-0.380858	0.383	0.491	4.33e-36	1
Id2	8.05e-39	0.328013	0.842	0.763	1.33e-34	1
Gimap6	1.1e-38	-0.32493	0.502	0.608	1.82e-34	1
Peli1	1.32e-38	-0.38684	0.456	0.55	2.19e-34	1
Nfkb1	5.42e-38	-0.281935	0.66	0.741	8.99e-34	1
Runx3	7.84e-38	-0.288766	0.783	0.861	1.3e-33	1
Ptpn22	3.42e-37	-0.312062	0.528	0.621	5.67e-33	1
Zbtb20	8.68e-37	-0.416984	0.609	0.666	1.44e-32	1
Mllt3	2.61e-35	-0.334516	0.468	0.56	4.33e-31	1
Gimap3	6.63e-35	-0.314967	0.449	0.552	1.1e-30	1
Ube2h	1.84e-34	-0.339762	0.306	0.413	3.05e-30	1
Ipcef1	5e-34	-0.34607	0.255	0.367	8.29e-30	1
Gng2	1.08e-33	-0.271661	0.664	0.741	1.78e-29	1
Ppp1r12a	5.57e-33	-0.27671	0.673	0.742	9.23e-29	1
Jak1	6.78e-33	-0.258415	0.758	0.809	1.12e-28	1
Rfx7	1.43e-32	-0.298022	0.514	0.606	2.38e-28	1
Myh9	1.61e-32	-0.257882	0.76	0.83	2.67e-28	1
Ripor2	1.94e-31	-0.347457	0.28	0.385	3.22e-27	1
Gimap4	4.28e-31	-0.260327	0.742	0.808	7.09e-27	1
Lpp	4.59e-31	-0.311796	0.48	0.565	7.61e-27	1
Apbb1ip	6.24e-31	-0.266516	0.546	0.64	1.03e-26	1
Zfp292	9.68e-31	-0.279129	0.581	0.653	1.61e-26	1
Atp11b	2.63e-30	-0.273363	0.619	0.688	4.35e-26	1
Cd247	4.21e-30	-0.259429	0.666	0.734	6.98e-26	1
Stat1	8.6e-30	-0.290041	0.683	0.78	1.43e-25	1
Sik3	9.86e-30	-0.282001	0.456	0.551	1.63e-25	1
Ccnd3	1.68e-29	-0.335227	0.696	0.757	2.78e-25	1
Usp3	1.73e-29	-0.286739	0.415	0.506	2.86e-25	1
Arih1	6.28e-29	-0.269809	0.563	0.631	1.04e-24	1
Wipf1	7.47e-29	-0.273185	0.506	0.585	1.24e-24	1
Il2ra	1.64e-28	-0.351401	0.528	0.611	2.72e-24	1
Aak1	2.97e-28	-0.280456	0.542	0.618	4.92e-24	1
Msi2	4.26e-28	-0.278822	0.358	0.454	7.06e-24	1
Nipbl	9.58e-28	-0.264046	0.566	0.632	1.59e-23	1
Cdk6	9.67e-28	-0.327179	0.701	0.782	1.6e-23	1
Prkca	4.58e-27	-0.298798	0.494	0.577	7.59e-23	1
Chd2	7.9e-27	-0.284404	0.504	0.575	1.31e-22	1
Clk1	1.41e-26	-0.280264	0.485	0.554	2.34e-22	1
Stk17b	1.65e-26	-0.260661	0.588	0.66	2.73e-22	1
Nsd3	2.79e-26	-0.265007	0.709	0.756	4.63e-22	1
Slc9a9	1.53e-25	-0.314233	0.601	0.664	2.54e-21	1
Sp100	2.6e-25	-0.251759	0.625	0.69	4.31e-21	1
Jmjd1c	3.81e-25	-0.278033	0.373	0.455	6.32e-21	1
Scml4	4.09e-25	-0.277523	0.161	0.256	6.78e-21	1
Lnpep	5.68e-25	-0.257837	0.514	0.58	9.41e-21	1
Il7r	6.79e-25	-0.32632	0.31	0.402	1.12e-20	1
Stat3	2.95e-24	-0.256035	0.432	0.514	4.89e-20	1
Tnik	6.13e-24	-0.2718	0.281	0.372	1.02e-19	1
4933406I18Rik	7.72e-24	-0.314546	0.372	0.45	1.28e-19	1
Smg6	1.65e-23	-0.306809	0.548	0.601	2.74e-19	1
Foxn3	2.42e-23	-0.295644	0.375	0.457	4.01e-19	1
Elf1	2.47e-23	-0.250722	0.531	0.6	4.09e-19	1
Parp8	3.14e-23	-0.278719	0.306	0.394	5.21e-19	1
Dgka	7.77e-23	-0.251997	0.222	0.312	1.29e-18	1
Rhoh	1.22e-22	-0.262293	0.555	0.609	2.02e-18	1
Clint1	1.45e-22	-0.264678	0.389	0.464	2.41e-18	1
Fyn	2.05e-22	-0.254481	0.533	0.594	3.4e-18	1
Sqstm1	7.32e-22	-0.28126	0.322	0.403	1.21e-17	1
Mctp2	9.08e-22	-0.27451	0.394	0.47	1.5e-17	1
Bcl11b	2.63e-21	-0.260405	0.474	0.538	4.35e-17	1
Lef1	3.12e-21	-0.331449	0.368	0.445	5.17e-17	1
Rps6ka3	4.61e-21	-0.256765	0.445	0.514	7.64e-17	1
Maml3	9e-21	-0.356335	0.361	0.44	1.49e-16	1
Cd226	1.86e-20	-0.298905	0.421	0.483	3.08e-16	1
Gm8369	5.69e-20	-0.270341	0.305	0.381	9.43e-16	1
Ahnak	6.67e-20	-0.253627	0.423	0.493	1.11e-15	1
Smyd3	1.07e-19	-0.275464	0.611	0.665	1.77e-15	1
Malt1	1.21e-18	-0.281533	0.442	0.499	2e-14	1
Ankrd12	1.51e-18	-0.257852	0.397	0.459	2.5e-14	1
Lrba	2.22e-18	-0.254032	0.428	0.485	3.68e-14	1
Airn	2.72e-18	-0.279122	0.411	0.475	4.5e-14	1
Fam169b	5.09e-18	-0.281147	0.551	0.588	8.43e-14	1
Gzma	1.25e-16	0.461446	0.67	0.596	2.06e-12	1
Iigp1	3.49e-12	-0.27853	0.326	0.389	5.78e-08	1
Vps37b	7.58e-11	-0.251555	0.401	0.436	1.26e-06	1
Rps27	0	0.57328	1	1	0	2
Ppia	0	-0.707724	0.998	1	0	2
Ran	0	-0.931268	0.761	0.917	0	2
Actb	0	-1.00902	1	1	0	2
H2afz	0	-1.10605	0.85	0.953	0	2
Ptma	0	-1.1544	0.996	0.999	0	2
Pclaf	0	-1.37785	0.375	0.747	0	2
Stmn1	0	-1.38616	0.559	0.845	0	2
Hmgb2	0	-1.566	0.917	0.959	0	2
Gzmb	0	-1.64603	0.922	0.966	0	2
Hsp90ab1	4.02e-303	-0.652072	1	1	6.66e-299	2
Tuba1b	5.07e-298	-1.14983	0.62	0.843	8.4e-294	2
Hmgb1	6.54e-295	-0.881966	0.903	0.964	1.08e-290	2
Ybx1	1.31e-291	-0.766396	0.935	0.981	2.17e-287	2
Dut	5.86e-281	-0.944912	0.583	0.842	9.71e-277	2
Ranbp1	1.34e-280	-0.950546	0.546	0.832	2.22e-276	2
Top2a	1.08e-278	-1.51417	0.479	0.752	1.79e-274	2
Pfn1	1.73e-264	-0.706923	0.996	0.998	2.87e-260	2
Lgals1	4.44e-261	-0.831829	0.994	0.996	7.36e-257	2
Hsp90b1	1.91e-254	-0.867649	0.815	0.922	3.16e-250	2
Hsp90aa1	1.06e-252	-0.867987	0.821	0.92	1.75e-248	2
Arhgap15	8.17e-252	0.691467	0.993	0.915	1.35e-247	2
Actg1	3.52e-245	-0.658756	1	1	5.84e-241	2
Txn1	1.68e-244	-0.718965	0.924	0.974	2.79e-240	2
Nasp	2.34e-242	-0.864522	0.371	0.722	3.88e-238	2
Eif5a	1.97e-241	-0.798689	0.894	0.957	3.27e-237	2
Ltb	6.88e-240	0.779734	0.853	0.621	1.14e-235	2
Lmnb1	4.64e-239	-0.843633	0.138	0.562	7.68e-235	2
Rrm2	1.15e-235	-0.82187	0.036	0.45	1.91e-231	2
Malat1	2.25e-235	0.518064	1	0.997	3.73e-231	2
Clspn	9.19e-235	-0.827363	0.043	0.458	1.52e-230	2
Birc5	1.98e-233	-0.964891	0.13	0.533	3.28e-229	2
Rps15a	2.61e-233	0.380439	1	1	4.33e-229	2
Mcm3	1.83e-231	-0.749609	0.148	0.575	3.03e-227	2
Hnrnpab	2.05e-231	-0.812891	0.492	0.791	3.39e-227	2
Rps27l	2.17e-230	-0.792061	0.705	0.882	3.59e-226	2
Mki67	1.29e-227	-1.09757	0.174	0.555	2.14e-223	2
Gm2682	2e-227	1.00169	0.617	0.301	3.31e-223	2
Rps24	2.67e-225	0.337528	1	1	4.43e-221	2
Rrm1	9.72e-223	-0.730253	0.084	0.495	1.61e-218	2
Smc2	1.25e-221	-0.848906	0.184	0.575	2.06e-217	2
Set	9.87e-221	-0.750838	0.772	0.912	1.63e-216	2
Calm1	1.8e-220	-0.595788	0.96	0.989	2.99e-216	2
Prdx1	8.77e-220	-0.74861	0.815	0.926	1.45e-215	2
Kif15	3.4e-217	-0.77176	0.062	0.462	5.63e-213	2
Nusap1	3.51e-213	-0.969413	0.082	0.467	5.82e-209	2
Kif11	1.02e-212	-0.850486	0.043	0.429	1.7e-208	2
Alyref	8.38e-211	-0.711111	0.294	0.67	1.39e-206	2
Ube2s	1.11e-210	-0.908686	0.513	0.775	1.83e-206	2
Pdcd4	2.93e-208	0.721384	0.77	0.524	4.86e-204	2
Btg1	4.31e-207	0.73584	0.77	0.53	7.15e-203	2
Diaph3	1.74e-205	-0.798556	0.116	0.509	2.89e-201	2
Pola1	2.47e-205	-0.76833	0.092	0.484	4.1e-201	2
Anp32b	4.96e-205	-0.63469	0.877	0.95	8.22e-201	2
Epsti1	6.72e-205	0.661605	0.981	0.87	1.11e-200	2
Nme1	2.69e-204	-0.710401	0.566	0.826	4.46e-200	2
Pcna	8.22e-202	-0.716886	0.149	0.541	1.36e-197	2
mt-Co3	2.31e-201	-0.558442	1	1	3.82e-197	2
Tpx2	1.56e-200	-0.746708	0.041	0.414	2.59e-196	2
Hint1	4.83e-200	-0.584363	0.89	0.959	8.01e-196	2
Dnmt1	3.07e-199	-0.655331	0.103	0.492	5.08e-195	2
Cks1b	2.2e-197	-0.684945	0.067	0.444	3.65e-193	2
Tyms	2.85e-197	-0.680774	0.06	0.437	4.73e-193	2
Mcm7	2.03e-194	-0.651063	0.115	0.504	3.36e-190	2
Ccnd3	8.51e-194	0.683339	0.888	0.734	1.41e-189	2
Incenp	9e-194	-0.724737	0.082	0.458	1.49e-189	2
Cdca8	4.74e-193	-0.701843	0.063	0.434	7.85e-189	2
Tubb4b	1.84e-192	-0.946545	0.45	0.73	3.05e-188	2
Snrpd1	1.46e-191	-0.654939	0.603	0.836	2.41e-187	2
Gmnn	1.86e-187	-0.645462	0.143	0.523	3.08e-183	2
Hist1h1b	2.3e-187	-1.20034	0.176	0.511	3.81e-183	2
Anp32e	1.13e-185	-0.644205	0.231	0.608	1.87e-181	2
Lig1	6.46e-185	-0.645708	0.088	0.46	1.07e-180	2
Dek	1.07e-183	-0.719384	0.582	0.81	1.78e-179	2
Fabp5	6.17e-182	-0.709121	0.14	0.514	1.02e-177	2
Sdf2l1	6.23e-181	-0.640078	0.109	0.479	1.03e-176	2
Rad51b	3.23e-180	-0.803694	0.204	0.565	5.35e-176	2
mt-Nd1	6.23e-180	-0.634395	0.996	0.998	1.03e-175	2
Serbp1	1.62e-179	-0.562242	0.945	0.98	2.68e-175	2
Tipin	7.88e-178	-0.598849	0.114	0.481	1.31e-173	2
Nucks1	1.03e-177	-0.65854	0.404	0.722	1.71e-173	2
Dbi	3.81e-177	-0.604652	0.406	0.737	6.32e-173	2
Ifitm2	4.72e-177	-0.896947	0.756	0.893	7.82e-173	2
Cenpf	8.77e-177	-0.878278	0.03	0.369	1.45e-172	2
Uhrf1	1.97e-176	-0.600089	0.043	0.385	3.26e-172	2
Cfl1	1.34e-175	-0.524177	0.966	0.989	2.23e-171	2
Cox5a	2.67e-175	-0.539964	0.932	0.973	4.43e-171	2
Nap1l1	1.73e-174	-0.610821	0.73	0.882	2.87e-170	2
Cdk1	4.24e-174	-0.630944	0.022	0.355	7.02e-170	2
Ncl	4.7e-171	-0.7431	0.945	0.966	7.79e-167	2
Hmgn2	5.8e-170	-0.611488	0.121	0.477	9.61e-166	2
Spc24	6.08e-170	-0.549522	0.023	0.352	1.01e-165	2
Hspa5	1.4e-169	-0.766482	0.607	0.812	2.31e-165	2
Hist1h2ap	2.72e-169	-1.03634	0.157	0.476	4.5e-165	2
Tuba4a	3.46e-168	-0.624854	0.162	0.521	5.74e-164	2
Tubb5	9.01e-168	-0.900049	0.971	0.975	1.49e-163	2
Prc1	1.66e-167	-0.73556	0.064	0.4	2.75e-163	2
Vim	2.55e-167	-0.594009	0.961	0.981	4.23e-163	2
Pa2g4	3.21e-167	-0.632965	0.253	0.611	5.33e-163	2
Gramd3	2.28e-166	0.762975	0.623	0.377	3.78e-162	2
Ezh2	5.41e-166	-0.633883	0.214	0.569	8.97e-162	2
Fyb	1.27e-165	0.576044	0.925	0.775	2.1e-161	2
Nhp2	6.23e-165	-0.604416	0.198	0.56	1.03e-160	2
mt-Cytb	1.11e-164	-0.622253	0.999	0.998	1.84e-160	2
Phgdh	2.24e-164	-0.590827	0.2	0.557	3.72e-160	2
Mcm5	2e-162	-0.559548	0.075	0.412	3.32e-158	2
Dennd4a	3.95e-162	0.587604	0.962	0.824	6.55e-158	2
Rangap1	2.63e-161	-0.567904	0.132	0.482	4.35e-157	2
Ccna2	2.65e-161	-0.575463	0.021	0.336	4.39e-157	2
Cenpe	9.24e-161	-0.645317	0.03	0.347	1.53e-156	2
Pdia6	5.54e-160	-0.612256	0.142	0.494	9.18e-156	2
Lsm2	9.51e-160	-0.555192	0.123	0.47	1.58e-155	2
Dtl	4.54e-159	-0.593823	0.054	0.379	7.52e-155	2
Cks2	3.06e-157	-0.66569	0.209	0.547	5.07e-153	2
Ube2c	5.2e-157	-0.919943	0.093	0.417	8.61e-153	2
Tpt1	3.88e-156	0.274774	1	1	6.43e-152	2
Manf	7.71e-156	-0.625868	0.325	0.656	1.28e-151	2
Foxp1	7.55e-154	0.593089	0.935	0.773	1.25e-149	2
Tmpo	9.87e-154	-0.638932	0.322	0.637	1.64e-149	2
Ncapg2	7.34e-153	-0.535842	0.025	0.33	1.22e-148	2
Fau	4.2e-152	0.274169	1	1	6.97e-148	2
Hspd1	4.24e-152	-0.697185	0.366	0.671	7.03e-148	2
Anapc5	7.79e-152	-0.526874	0.202	0.556	1.29e-147	2
Stat4	8.21e-151	0.634183	0.706	0.499	1.36e-146	2
Calr	2.43e-150	-0.662904	0.789	0.881	4.03e-146	2
Hdgf	1.01e-148	-0.551762	0.347	0.678	1.68e-144	2
Tagln2	1.09e-147	-0.58027	0.899	0.947	1.81e-143	2
Cycs	2.59e-147	-0.542831	0.149	0.486	4.29e-143	2
Eif4a1	4.05e-147	-0.542046	0.912	0.952	6.71e-143	2
Cdca3	9.2e-147	-0.543498	0.037	0.337	1.52e-142	2
Hmmr	3.06e-146	-0.564653	0.013	0.304	5.08e-142	2
Cenpp	1.95e-145	-0.579159	0.03	0.326	3.23e-141	2
Fbxo5	2.56e-145	-0.517005	0.022	0.314	4.24e-141	2
Nop58	3.45e-145	-0.574211	0.126	0.453	5.71e-141	2
Knl1	9.27e-145	-0.534624	0.018	0.309	1.54e-140	2
Slbp	1.7e-144	-0.611052	0.298	0.616	2.81e-140	2
H2afx	2.35e-144	-0.833494	0.19	0.497	3.89e-140	2
Tmsb4x	3.8e-144	-0.439983	1	1	6.3e-140	2
Eif1ax	7.78e-144	-0.530704	0.204	0.54	1.29e-139	2
Mcm6	7.97e-143	-0.547214	0.161	0.494	1.32e-138	2
Atp5b	2.14e-142	-0.500157	0.843	0.928	3.55e-138	2
Lsm6	5.43e-142	-0.506733	0.405	0.725	8.99e-138	2
Neil3	2.23e-141	-0.542684	0.012	0.293	3.7e-137	2
Topbp1	4.09e-141	-0.513576	0.095	0.412	6.78e-137	2
Srsf2	5.42e-141	-0.574508	0.408	0.699	8.98e-137	2
Ypel3	6.32e-141	0.555986	0.518	0.27	1.05e-136	2
Hells	4.12e-139	-0.51955	0.088	0.4	6.83e-135	2
Hnrnpu	1.24e-138	-0.546093	0.709	0.862	2.05e-134	2
Cbx5	1.87e-138	-0.495933	0.091	0.401	3.1e-134	2
Nsd2	1.98e-138	-0.561702	0.197	0.527	3.29e-134	2
Tfrc	1.15e-137	-0.570587	0.128	0.443	1.91e-133	2
Ywhah	1.2e-137	-0.546666	0.456	0.735	2e-133	2
Cct6a	2.99e-137	-0.552922	0.227	0.553	4.96e-133	2
Ppp1r14b	4.72e-137	-0.640974	0.447	0.707	7.82e-133	2
Rps21	4.98e-137	0.291456	1	1	8.25e-133	2
Canx	1.13e-136	-0.522885	0.27	0.604	1.87e-132	2
Ccnb2	1.59e-136	-0.541409	0.033	0.317	2.63e-132	2
Ssrp1	4.1e-136	-0.507273	0.275	0.606	6.79e-132	2
Nop56	4.78e-135	-0.53557	0.115	0.429	7.92e-131	2
Rpl34	5.24e-135	0.276642	1	1	8.69e-131	2
Racgap1	6.79e-135	-0.526113	0.068	0.363	1.13e-130	2
Rps14	4.59e-134	0.25016	1	1	7.6e-130	2
Siva1	7.72e-134	-0.500865	0.202	0.531	1.28e-129	2
Ndufa12	9.9e-133	-0.486867	0.258	0.593	1.64e-128	2
Rpl18a	3.24e-132	0.258328	1	1	5.37e-128	2
Selenoh	8.82e-132	-0.496558	0.219	0.545	1.46e-127	2
Srsf7	1.4e-131	-0.529442	0.448	0.731	2.32e-127	2
Asf1b	4.99e-131	-0.466626	0.031	0.307	8.28e-127	2
Smc1a	6.34e-131	-0.53219	0.427	0.711	1.05e-126	2
Rps17	1.84e-130	-0.408112	0.994	0.997	3.04e-126	2
Kif4	3.87e-130	-0.473889	0.019	0.288	6.42e-126	2
Brip1	3.89e-130	-0.488487	0.032	0.306	6.45e-126	2
Banf1	1.26e-128	-0.485038	0.266	0.595	2.08e-124	2
Pde3b	1.4e-128	0.514845	0.916	0.755	2.32e-124	2
Ptges3	1.93e-128	-0.502369	0.348	0.663	3.19e-124	2
Cit	3.09e-128	-0.480479	0.038	0.313	5.12e-124	2
Themis	3.6e-128	0.440735	0.999	0.962	5.96e-124	2
Ddx39	3.78e-128	-0.479335	0.101	0.398	6.26e-124	2
Hspa8	1.46e-127	-0.444245	0.989	0.994	2.42e-123	2
Zfp367	4.14e-127	-0.515759	0.077	0.363	6.86e-123	2
Tcp1	5.12e-127	-0.48445	0.332	0.655	8.48e-123	2
Snrpd3	5.41e-127	-0.49639	0.35	0.667	8.97e-123	2
Rpl30	6.41e-127	0.258764	1	1	1.06e-122	2
Lsm7	1.83e-125	-0.503887	0.345	0.658	3.03e-121	2
Cct3	2.46e-125	-0.48437	0.241	0.564	4.08e-121	2
Rps7	3.8e-124	0.262074	1	1	6.29e-120	2
Nolc1	5.79e-124	-0.542667	0.101	0.391	9.6e-120	2
Bach2	7.75e-124	0.620797	0.666	0.463	1.28e-119	2
Snrpf	8.25e-124	-0.473937	0.756	0.897	1.37e-119	2
Metap2	1.72e-123	-0.464159	0.27	0.591	2.85e-119	2
Prmt1	2.09e-123	-0.48319	0.211	0.534	3.46e-119	2
Atad2	2.39e-123	-0.558159	0.215	0.526	3.96e-119	2
Hnrnpa3	2.55e-123	-0.51693	0.789	0.891	4.22e-119	2
Zbtb20	3.7e-123	0.56211	0.805	0.643	6.13e-119	2
Pdap1	3.77e-123	-0.502636	0.324	0.632	6.25e-119	2
Rad51	4.4e-123	-0.420075	0.029	0.289	7.3e-119	2
Ifitm1	6.69e-123	-1.19276	0.876	0.882	1.11e-118	2
Esco2	4.1e-122	-0.463247	0.012	0.263	6.8e-118	2
Syncrip	4.52e-122	-0.473782	0.281	0.605	7.49e-118	2
Rbbp7	4.92e-122	-0.470009	0.201	0.519	8.15e-118	2
Srsf3	5.9e-122	-0.500416	0.727	0.863	9.77e-118	2
Tacc3	9.06e-121	-0.44457	0.051	0.319	1.5e-116	2
Hnrnpd	4.51e-120	-0.505264	0.52	0.765	7.48e-116	2
Tmem163	7.91e-120	-0.598731	0.32	0.602	1.31e-115	2
Atp5g1	8.43e-120	-0.504892	0.512	0.76	1.4e-115	2
Dctpp1	4.36e-119	-0.448862	0.111	0.4	7.22e-115	2
Atp5k	7.28e-119	-0.480188	0.525	0.778	1.21e-114	2
2025-09-11	9.74e-119	-0.446347	0.173	0.481	1.61e-114	2
Tpm4	4.17e-118	-0.462729	0.227	0.543	6.91e-114	2
Cenpa	1.09e-117	-0.617336	0.116	0.396	1.8e-113	2
Etfb	1.4e-117	-0.455773	0.229	0.542	2.32e-113	2
mt-Nd3	4.8e-117	-0.57653	0.82	0.903	7.95e-113	2
Cdkn1a	9.85e-117	-0.521194	0.125	0.416	1.63e-112	2
Cdk6	2.92e-116	-0.646357	0.642	0.787	4.84e-112	2
Mcm4	3.91e-116	-0.454193	0.12	0.405	6.47e-112	2
Hpf1	5.15e-116	-0.435398	0.179	0.479	8.53e-112	2
Dtymk	1.12e-115	-0.438025	0.126	0.419	1.86e-111	2
Eif3b	1.59e-115	-0.439865	0.116	0.403	2.63e-111	2
Pdia3	9.81e-115	-0.50111	0.658	0.834	1.63e-110	2
C1qbp	1.13e-114	-0.491897	0.215	0.515	1.87e-110	2
Fdps	2.98e-114	-0.489994	0.106	0.384	4.94e-110	2
Mrpl20	4.28e-114	-0.448932	0.275	0.582	7.09e-110	2
Uqcrq	4.39e-114	-0.452926	0.681	0.86	7.28e-110	2
Spc25	5.21e-114	-0.418192	0.02	0.264	8.63e-110	2
Tk1	2.86e-113	-0.415854	0.039	0.289	4.73e-109	2
Mrpl12	6.05e-113	-0.462703	0.203	0.501	1e-108	2
Atad5	6.17e-113	-0.422593	0.039	0.29	1.02e-108	2
Rpn1	6.23e-113	-0.430763	0.106	0.385	1.03e-108	2
Hist1h1e	1.49e-112	-0.510888	0.065	0.324	2.46e-108	2
Tpm3	1.62e-112	-0.413619	0.864	0.935	2.69e-108	2
Fbl	3.26e-112	-0.467198	0.313	0.616	5.41e-108	2
Tcf7	3.83e-111	0.420313	0.255	0.089	6.35e-107	2
Ppa1	4.16e-111	-0.444698	0.1	0.37	6.9e-107	2
Ddx21	1.78e-109	-0.475299	0.171	0.459	2.94e-105	2
Ipcef1	2.09e-109	0.518205	0.553	0.332	3.46e-105	2
Fkbp2	7.51e-109	-0.389539	0.069	0.327	1.24e-104	2
Uqcr11	3.59e-108	-0.449389	0.535	0.778	5.95e-104	2
Rif1	3.92e-108	-0.432023	0.125	0.4	6.5e-104	2
Odc1	4.39e-108	-0.483636	0.187	0.474	7.27e-104	2
Orc6	5.82e-108	-0.430244	0.115	0.386	9.64e-104	2
Ect2	9.74e-108	-0.40164	0.02	0.253	1.61e-103	2
Calm3	1.23e-107	-0.444769	0.388	0.672	2.04e-103	2
Psat1	2.28e-107	-0.389107	0.055	0.304	3.78e-103	2
Ldlr	5.35e-107	-0.441102	0.044	0.286	8.87e-103	2
Lyar	7.27e-106	-0.423251	0.1	0.366	1.2e-101	2
Samhd1	5.47e-105	0.540764	0.661	0.496	9.07e-101	2
Ncapg	6.23e-105	-0.373732	0.025	0.254	1.03e-100	2
Uqcc2	6.3e-105	-0.419078	0.22	0.516	1.04e-100	2
Ldha	6.86e-105	-0.423756	0.988	0.991	1.14e-100	2
Ncapd2	1.24e-104	-0.397927	0.058	0.304	2.05e-100	2
Snrpb	1.31e-104	-0.418388	0.377	0.674	2.17e-100	2
Satb1	1.68e-104	0.520871	0.773	0.644	2.78e-100	2
Ndc80	3.1e-104	-0.401522	0.043	0.283	5.14e-100	2
Arhgdia	4.87e-104	-0.446383	0.598	0.817	8.07e-100	2
Kif20b	6.43e-103	-0.408673	0.043	0.278	1.07e-98	2
Gm26740	8.56e-103	0.423945	0.277	0.107	1.42e-98	2
Utrn	9.28e-103	0.5102	0.766	0.648	1.54e-98	2
Brca1	1.63e-102	-0.389353	0.029	0.258	2.71e-98	2
Rfc3	1.73e-102	-0.382594	0.052	0.292	2.86e-98	2
Ppil1	1.73e-102	-0.369554	0.07	0.318	2.86e-98	2
Mrpl18	4.74e-102	-0.412669	0.265	0.56	7.85e-98	2
Cenpw	7.19e-102	-0.400023	0.102	0.36	1.19e-97	2
Ulbp1	1.74e-101	-0.433115	0.089	0.341	2.88e-97	2
Hnrnpa2b1	2.12e-101	-0.432306	0.818	0.905	3.51e-97	2
Bub3	3.4e-101	-0.448368	0.266	0.552	5.64e-97	2
Smc3	4.55e-101	-0.419857	0.229	0.519	7.55e-97	2
Cdc20	1.55e-100	-0.457752	0.028	0.253	2.57e-96	2
Ndufc1	5.18e-100	-0.414228	0.384	0.664	8.59e-96	2
Cenph	6.25e-100	-0.34922	0.029	0.254	1.04e-95	2
Ybx3	6.77e-100	-0.498106	0.537	0.747	1.12e-95	2
Nudc	8.56e-100	-0.406424	0.205	0.488	1.42e-95	2
Cep128	9.42e-100	-0.469093	0.098	0.347	1.56e-95	2
Ddost	1.62e-98	-0.407705	0.256	0.546	2.69e-94	2
Kdm5b	2.24e-98	0.387216	0.338	0.152	3.72e-94	2
Mir142hg	8.69e-98	0.411873	0.973	0.896	1.44e-93	2
Cdv3	1.02e-97	-0.409952	0.196	0.474	1.69e-93	2
AI506816	2.25e-97	-0.392807	0.111	0.365	3.73e-93	2
Psmd1	2.27e-97	-0.393439	0.155	0.421	3.75e-93	2
G3bp1	2.78e-97	-0.434621	0.438	0.699	4.61e-93	2
Nme2	2.8e-97	-0.352148	0.993	0.994	4.63e-93	2
Supt16	3.92e-97	-0.404146	0.3	0.597	6.49e-93	2
Ube2m	4.54e-97	-0.43913	0.412	0.669	7.53e-93	2
Ndufs6	5.3e-97	-0.395903	0.412	0.692	8.78e-93	2
Pole	1.02e-96	-0.365461	0.047	0.275	1.7e-92	2
Impdh2	1.36e-96	-0.389027	0.312	0.611	2.25e-92	2
Cdk4	1.37e-96	-0.406663	0.22	0.501	2.27e-92	2
Arpp19	2.35e-96	-0.418099	0.516	0.756	3.9e-92	2
Aff3	2.62e-96	0.551527	0.402	0.206	4.35e-92	2
AI662270	5.52e-96	-0.386522	0.169	0.44	9.15e-92	2
Lsm4	1.12e-95	-0.379599	0.322	0.62	1.86e-91	2
Gm8369	1.31e-95	0.528214	0.537	0.354	2.17e-91	2
Psmc3	1.45e-95	-0.385654	0.254	0.546	2.4e-91	2
Il7r	1.86e-95	0.617421	0.556	0.373	3.08e-91	2
Psmb5	2.07e-95	-0.391544	0.32	0.615	3.43e-91	2
Park7	2.24e-95	-0.444414	0.633	0.809	3.72e-91	2
Usp1	3.52e-95	-0.370655	0.102	0.354	5.83e-91	2
Tnfrsf9	4.26e-95	-0.65816	0.379	0.597	7.06e-91	2
Srm	5.65e-95	-0.399623	0.043	0.267	9.36e-91	2
Idi1	6.6e-95	-0.358474	0.036	0.257	1.09e-90	2
Shisa5	6.77e-95	0.358714	0.984	0.936	1.12e-90	2
AA467197	8.36e-95	-0.541177	0.23	0.5	1.38e-90	2
Pmf1	1.05e-94	-0.347287	0.066	0.299	1.74e-90	2
Cisd1	1.39e-94	-0.372104	0.124	0.378	2.3e-90	2
Snrpa1	1.89e-94	-0.38698	0.131	0.387	3.13e-90	2
Trbc2	2.13e-94	0.267498	1	1	3.52e-90	2
Prim1	2.71e-94	-0.346015	0.05	0.278	4.5e-90	2
Rad21	3.77e-94	-0.436405	0.215	0.485	6.24e-90	2
Ncapd3	4.77e-94	-0.421253	0.129	0.38	7.91e-90	2
Snu13	5.72e-94	-0.430295	0.404	0.672	9.49e-90	2
Scml4	1.16e-93	0.484533	0.42	0.225	1.92e-89	2
Rexo2	1.75e-93	-0.397138	0.263	0.55	2.91e-89	2
Fen1	4.22e-93	-0.327779	0.039	0.258	7e-89	2
Dnajc2	7.64e-93	-0.380254	0.185	0.459	1.27e-88	2
Ndufb7	9.6e-93	-0.402807	0.6	0.817	1.59e-88	2
Sae1	1.08e-92	-0.37713	0.185	0.46	1.79e-88	2
Hmgb3	1.87e-92	-0.340083	0.047	0.268	3.1e-88	2
Atp5g3	2.2e-92	-0.389563	0.445	0.708	3.64e-88	2
Ptp4a3	5.71e-92	-0.401899	0.147	0.404	9.46e-88	2
Tfdp1	1.09e-91	-0.344244	0.087	0.326	1.8e-87	2
Tuba1c	1.95e-91	-0.438105	0.112	0.354	3.23e-87	2
Raly	4.12e-91	-0.379635	0.251	0.532	6.82e-87	2
Sfxn1	6.88e-91	-0.360767	0.121	0.373	1.14e-86	2
Mrpl33	1.32e-90	-0.389412	0.406	0.673	2.2e-86	2
Rnps1	2.42e-90	-0.373866	0.237	0.516	4.01e-86	2
Gspt1	4.38e-90	-0.381951	0.235	0.514	7.27e-86	2
Rbm8a	5.33e-90	-0.378145	0.298	0.584	8.84e-86	2
Slc25a5	9.95e-90	-0.405541	0.675	0.836	1.65e-85	2
Irf8	1.26e-89	-0.425835	0.105	0.34	2.09e-85	2
Uqcr10	1.35e-89	-0.394765	0.749	0.883	2.24e-85	2
Dpy30	1.46e-89	-0.361146	0.159	0.417	2.42e-85	2
Eif4g1	1.57e-89	-0.387076	0.196	0.466	2.6e-85	2
Fam111a	2.03e-89	-0.354664	0.1	0.34	3.37e-85	2
P2ry14	2.22e-89	-0.445134	0.116	0.357	3.67e-85	2
Ncaph2	2.39e-89	-0.380035	0.161	0.416	3.97e-85	2
Akap13	4.93e-89	0.374093	0.965	0.862	8.18e-85	2
Chaf1a	6.41e-89	-0.321556	0.039	0.251	1.06e-84	2
Psmb3	1.64e-88	-0.415587	0.764	0.869	2.72e-84	2
Kmt5a	2.15e-88	-0.355092	0.128	0.373	3.56e-84	2
Ube2h	2.82e-88	0.488989	0.559	0.383	4.67e-84	2
Gar1	4.48e-88	-0.342785	0.078	0.306	7.43e-84	2
Peli1	6.72e-88	0.540644	0.654	0.526	1.11e-83	2
Pcbp1	8.33e-88	-0.397387	0.537	0.763	1.38e-83	2
Mcm2	1.06e-87	-0.326781	0.054	0.271	1.76e-83	2
Eprs	1.32e-87	-0.370718	0.223	0.5	2.19e-83	2
Tkt	2.3e-87	-0.398584	0.556	0.769	3.82e-83	2
Ifitm3	8.26e-87	-0.852249	0.487	0.66	1.37e-82	2
Ogt	9.56e-87	0.494371	0.631	0.491	1.58e-82	2
Saraf	9.62e-87	0.475709	0.659	0.543	1.6e-82	2
Magoh	1.01e-86	-0.364084	0.229	0.501	1.67e-82	2
Mms22l	1.63e-86	-0.364168	0.109	0.345	2.71e-82	2
Mrpl51	1.02e-85	-0.34957	0.145	0.39	1.68e-81	2
Cmc2	2.65e-85	-0.328353	0.081	0.305	4.39e-81	2
Psma1	2.85e-85	-0.362119	0.274	0.55	4.72e-81	2
Prkch	6.07e-85	0.401146	0.929	0.802	1.01e-80	2
Cyp51	6.32e-85	-0.356952	0.059	0.272	1.05e-80	2
Crip1	6.75e-85	-0.479198	0.953	0.957	1.12e-80	2
Ipo5	7.92e-85	-0.32169	0.077	0.3	1.31e-80	2
Cct7	8.03e-85	-0.378536	0.348	0.623	1.33e-80	2
Sdhb	1.28e-84	-0.360983	0.262	0.529	2.11e-80	2
Cacybp	1.42e-84	-0.3729	0.147	0.391	2.35e-80	2
Rcc2	2.07e-84	-0.369179	0.178	0.433	3.43e-80	2
Cmtm7	2.27e-84	-0.457861	0.469	0.687	3.76e-80	2
Cbx3	2.63e-84	-0.404443	0.43	0.684	4.36e-80	2
Xpo1	2.8e-84	-0.363679	0.158	0.409	4.64e-80	2
Rfwd3	3.91e-84	-0.389078	0.116	0.346	6.47e-80	2
Oaz1	6.05e-84	-0.31164	0.993	0.993	1e-79	2
Ppp4c	6.54e-84	-0.346452	0.233	0.503	1.08e-79	2
Rbm3	1.19e-83	-0.324779	0.996	0.993	1.98e-79	2
Txnip	1.43e-83	0.46834	0.557	0.384	2.37e-79	2
Cct8	3.16e-83	-0.400888	0.53	0.747	5.23e-79	2
Hjurp	3.35e-83	-0.410374	0.154	0.389	5.55e-79	2
Wdr76	3.5e-83	-0.324161	0.058	0.27	5.79e-79	2
Eif2s1	3.54e-83	-0.352029	0.163	0.41	5.86e-79	2
Ubl4a	5.45e-83	-0.328878	0.116	0.35	9.03e-79	2
Syce2	5.61e-83	-0.351221	0.116	0.35	9.3e-79	2
Pnrc1	6.73e-83	0.47945	0.64	0.521	1.12e-78	2
Eif5b	6.79e-83	-0.361892	0.258	0.528	1.13e-78	2
Atp5f1	9.58e-83	-0.372669	0.802	0.895	1.59e-78	2
Gimap6	1.33e-82	0.460574	0.701	0.583	2.21e-78	2
Cdc34	2.33e-82	-0.331971	0.109	0.339	3.87e-78	2
Ewsr1	2.56e-82	-0.359243	0.294	0.569	4.25e-78	2
Snrpd2	3.32e-82	-0.359387	0.817	0.902	5.49e-78	2
Atpif1	3.93e-82	-0.38575	0.573	0.783	6.51e-78	2
Smarcc1	5.47e-82	-0.358051	0.173	0.421	9.07e-78	2
Hspa9	1.02e-81	-0.379296	0.19	0.439	1.69e-77	2
Mybbp1a	1.22e-81	-0.34385	0.091	0.314	2.02e-77	2
Ly6a	1.23e-81	-0.625705	0.966	0.949	2.04e-77	2
Rfc2	1.55e-81	-0.342834	0.156	0.402	2.57e-77	2
Uchl3	2.03e-81	-0.323155	0.096	0.32	3.37e-77	2
Prim2	6.22e-81	-0.338374	0.091	0.312	1.03e-76	2
Ptbp1	6.24e-81	-0.336324	0.17	0.417	1.03e-76	2
mt-Co2	6.55e-81	-0.404257	1	0.999	1.09e-76	2
Mrpl13	8.66e-81	-0.334946	0.143	0.379	1.44e-76	2
Fkbp4	8.71e-81	-0.349267	0.148	0.387	1.44e-76	2
Timm13	2.64e-80	-0.385389	0.437	0.685	4.38e-76	2
Ndufa11	2.92e-80	-0.36143	0.309	0.578	4.84e-76	2
Mthfd2	3.63e-80	-0.35667	0.161	0.399	6.01e-76	2
Npm3	4.12e-80	-0.365136	0.276	0.54	6.83e-76	2
Ndufa5	5.62e-80	-0.348957	0.235	0.496	9.32e-76	2
Ube2l3	5.82e-80	-0.351584	0.463	0.713	9.64e-76	2
Cct5	8.45e-80	-0.378361	0.507	0.74	1.4e-75	2
Ndufb8	9.29e-80	-0.337133	0.312	0.586	1.54e-75	2
Sfpq	9.89e-80	-0.393642	0.554	0.759	1.64e-75	2
Noc2l	1.01e-79	-0.336634	0.117	0.346	1.67e-75	2
Fth1	1.04e-79	-0.394532	0.993	0.993	1.72e-75	2
Ssbp2	1.35e-79	0.448678	0.768	0.638	2.23e-75	2
Dnajb11	1.37e-79	-0.346976	0.176	0.419	2.28e-75	2
U2af1	1.7e-79	-0.362015	0.398	0.663	2.82e-75	2
Psma7	2.08e-79	-0.384424	0.721	0.855	3.45e-75	2
Psmb6	2.66e-79	-0.352873	0.301	0.568	4.41e-75	2
Rbl1	2.78e-79	-0.332771	0.086	0.303	4.6e-75	2
Snrpa	3.97e-79	-0.341447	0.162	0.401	6.58e-75	2
Maml2	9.3e-79	0.43766	0.814	0.672	1.54e-74	2
Rpn2	1.81e-78	-0.335448	0.181	0.427	2.99e-74	2
Ripor2	3.32e-78	0.498918	0.529	0.356	5.5e-74	2
Ndufb2	5.65e-78	-0.343974	0.213	0.462	9.37e-74	2
Bax	9.91e-78	-0.417468	0.522	0.732	1.64e-73	2
Tmem14c	1.12e-77	-0.328555	0.172	0.412	1.85e-73	2
Baz1b	1.2e-77	-0.355484	0.232	0.489	2e-73	2
Gmds	1.47e-77	-0.379899	0.293	0.553	2.43e-73	2
Mrpl42	1.97e-77	-0.33502	0.176	0.419	3.27e-73	2
Sec11c	2.16e-77	-0.358506	0.311	0.569	3.58e-73	2
Polr2f	2.25e-77	-0.336117	0.191	0.437	3.74e-73	2
Psmb2	3.93e-77	-0.387811	0.704	0.841	6.51e-73	2
Ywhaq	4.91e-77	-0.314995	0.223	0.484	8.14e-73	2
Ndufb6	6.15e-77	-0.315191	0.166	0.41	1.02e-72	2
Dazap1	7.14e-77	-0.329852	0.223	0.478	1.18e-72	2
Dkc1	8.16e-77	-0.316072	0.083	0.294	1.35e-72	2
Cox5b	8.32e-77	-0.339402	0.841	0.915	1.38e-72	2
Cyc1	1.82e-76	-0.333199	0.145	0.374	3.02e-72	2
Psmd7	2.34e-76	-0.350831	0.197	0.444	3.88e-72	2
Gars	3.54e-76	-0.323615	0.144	0.376	5.87e-72	2
Ywhae	4.11e-76	-0.374311	0.615	0.796	6.8e-72	2
Eif3a	4.25e-76	-0.400749	0.533	0.74	7.04e-72	2
Aarsd1	5.02e-76	-0.311328	0.128	0.355	8.32e-72	2
Ptpn18	6.21e-76	0.35321	0.972	0.925	1.03e-71	2
Atp5j	8.19e-76	-0.348849	0.763	0.881	1.36e-71	2
Mrto4	8.56e-76	-0.320331	0.087	0.296	1.42e-71	2
Erh	1.12e-75	-0.314461	0.146	0.378	1.85e-71	2
Mxd4	1.68e-75	0.361234	0.341	0.174	2.79e-71	2
Dnajc9	1.83e-75	-0.343885	0.193	0.432	3.04e-71	2
Bzw1	2.99e-75	-0.359256	0.43	0.685	4.96e-71	2
Anxa2	3.15e-75	-0.393424	0.635	0.817	5.22e-71	2
Pfdn5	1.01e-74	0.338536	0.949	0.894	1.68e-70	2
Rapgef6	1.53e-74	0.345587	0.922	0.826	2.54e-70	2
Nudt5	1.62e-74	-0.31432	0.124	0.344	2.68e-70	2
Timm23	2.39e-74	-0.351029	0.261	0.514	3.97e-70	2
Hprt	4.12e-74	-0.328946	0.299	0.562	6.84e-70	2
Mpp6	4.32e-74	-0.307898	0.109	0.326	7.16e-70	2
Dgka	4.81e-74	0.447976	0.451	0.285	7.98e-70	2
Mtch1	4.82e-74	-0.325691	0.249	0.504	7.98e-70	2
Hcst	5.33e-74	0.450712	0.746	0.665	8.83e-70	2
Denr	5.45e-74	-0.32538	0.234	0.481	9.04e-70	2
Gzma	5.52e-74	-1.71089	0.449	0.622	9.14e-70	2
Acot7	6.94e-74	-0.315685	0.161	0.393	1.15e-69	2
Mlec	8.95e-74	-0.316625	0.173	0.407	1.48e-69	2
Flna	1.24e-73	-0.305029	0.118	0.334	2.05e-69	2
Tcerg1	1.38e-73	-0.321662	0.16	0.393	2.29e-69	2
Micos10	1.78e-73	-0.327733	0.394	0.659	2.95e-69	2
Psmd2	2.82e-73	-0.327803	0.197	0.432	4.68e-69	2
Pomp	3.03e-73	-0.344702	0.482	0.718	5.01e-69	2
Eloc	4.16e-73	-0.323983	0.228	0.475	6.9e-69	2
Hras	4.17e-73	-0.309063	0.135	0.358	6.91e-69	2
Eny2	4.7e-73	-0.324806	0.248	0.497	7.78e-69	2
Cox6a1	4.87e-73	-0.343624	0.632	0.813	8.07e-69	2
Psma4	5.32e-73	-0.355378	0.436	0.68	8.82e-69	2
Rfc4	5.35e-73	-0.287218	0.063	0.256	8.87e-69	2
Evl	5.43e-73	0.366017	0.87	0.781	9e-69	2
Ctla4	5.54e-73	0.460373	0.444	0.276	9.18e-69	2
Eif4g2	7.75e-73	-0.353979	0.403	0.655	1.28e-68	2
Tnrc6b	8.48e-73	0.392285	0.759	0.659	1.41e-68	2
Pdia4	1.14e-72	-0.326634	0.115	0.327	1.9e-68	2
Rbbp4	1.23e-72	-0.357693	0.362	0.612	2.03e-68	2
Skap1	1.41e-72	0.309349	0.999	0.975	2.34e-68	2
Swi5	2.56e-72	-0.326699	0.336	0.597	4.25e-68	2
Ebna1bp2	3.8e-72	-0.313598	0.111	0.322	6.29e-68	2
Rsl1d1	9.36e-72	-0.343079	0.206	0.442	1.55e-67	2
Bola3	1.37e-71	-0.297116	0.154	0.381	2.27e-67	2
Ckap5	1.51e-71	-0.381249	0.22	0.454	2.51e-67	2
Ccdc124	1.79e-71	-0.308634	0.141	0.36	2.97e-67	2
Kpnb1	2.08e-71	-0.293445	0.114	0.329	3.45e-67	2
Gpr141	2.13e-71	-0.368723	0.249	0.496	3.53e-67	2
Hist1h4d	3.35e-71	-0.392255	0.129	0.336	5.56e-67	2
Bola2	3.43e-71	-0.332279	0.347	0.601	5.68e-67	2
Psme2	3.5e-71	-0.351403	0.522	0.75	5.8e-67	2
Wdr43	3.83e-71	-0.356907	0.182	0.411	6.34e-67	2
Atp5o	4.57e-71	-0.339821	0.562	0.769	7.57e-67	2
Baz1a	6.02e-71	-0.326573	0.196	0.43	9.98e-67	2
Ywhab	7.77e-71	-0.324741	0.308	0.56	1.29e-66	2
Pitpnc1	9.41e-71	0.339499	0.977	0.871	1.56e-66	2
Spp1	1.16e-70	-0.866634	0.069	0.26	1.92e-66	2
Naa50	1.45e-70	-0.290553	0.123	0.338	2.41e-66	2
Cd3d	1.56e-70	0.300686	0.993	0.961	2.58e-66	2
Dock2	1.94e-70	0.344062	0.982	0.915	3.22e-66	2
Ddx39b	1.98e-70	-0.348549	0.507	0.728	3.28e-66	2
Fkbp1a	2.27e-70	-0.342031	0.333	0.587	3.76e-66	2
1500009L16Rik	3.04e-70	-0.322753	0.115	0.321	5.04e-66	2
E2f3	3.37e-70	-0.30441	0.098	0.302	5.59e-66	2
Elob	3.63e-70	-0.313775	0.866	0.938	6.01e-66	2
Ipo7	4.07e-70	-0.306078	0.108	0.314	6.74e-66	2
Sh3kbp1	4.08e-70	0.374862	0.822	0.729	6.77e-66	2
Ndufab1	6.17e-70	-0.322237	0.196	0.428	1.02e-65	2
Acsl5	7.82e-70	-0.286362	0.088	0.288	1.3e-65	2
P4hb	9.19e-70	-0.31998	0.25	0.493	1.52e-65	2
Dhx9	1.25e-69	-0.328642	0.235	0.483	2.07e-65	2
Srrt	2.04e-69	-0.297115	0.145	0.363	3.38e-65	2
Sub1	2.17e-69	-0.38434	0.918	0.954	3.59e-65	2
Nubp1	2.18e-69	-0.299427	0.176	0.403	3.61e-65	2
Lsm3	2.57e-69	-0.298298	0.134	0.347	4.25e-65	2
Suz12	4e-69	-0.349971	0.28	0.52	6.63e-65	2
Tuba1a	4.36e-69	-0.340759	0.177	0.398	7.22e-65	2
Sms	4.73e-69	-0.317434	0.242	0.484	7.83e-65	2
Srsf9	5e-69	-0.288697	0.13	0.343	8.29e-65	2
Dynll2	5.01e-69	-0.295762	0.122	0.332	8.3e-65	2
Jpt1	5.68e-69	-0.389672	0.616	0.793	9.42e-65	2
Ezr	6.25e-69	-0.334485	0.338	0.587	1.04e-64	2
Eif4a3	6.5e-69	-0.294073	0.161	0.385	1.08e-64	2
Hmgn5	9.67e-69	-0.274359	0.065	0.254	1.6e-64	2
Dbf4	1.08e-68	-0.294074	0.087	0.284	1.8e-64	2
Eif4e	1.13e-68	-0.303303	0.148	0.364	1.87e-64	2
Psmd13	3.11e-68	-0.302506	0.256	0.499	5.15e-64	2
Hmgcs1	3.32e-68	-0.34905	0.095	0.292	5.49e-64	2
Ccdc34	3.55e-68	-0.285323	0.07	0.26	5.88e-64	2
Rnaseh2b	4.53e-68	-0.26266	0.067	0.256	7.51e-64	2
Atp5j2	4.95e-68	-0.299238	0.912	0.954	8.2e-64	2
Mbd3	7.59e-68	-0.290226	0.134	0.343	1.26e-63	2
Psmb4	8.63e-68	-0.321696	0.484	0.719	1.43e-63	2
Nudcd2	1.42e-67	-0.283037	0.086	0.279	2.35e-63	2
Ndufs5	2.06e-67	-0.298871	0.287	0.539	3.41e-63	2
Metrn	2.96e-67	-0.266514	0.076	0.266	4.91e-63	2
Txnl1	2.96e-67	-0.320527	0.287	0.533	4.91e-63	2
Gimap3	3.59e-67	0.428212	0.641	0.529	5.94e-63	2
Nelfe	3.87e-67	-0.281789	0.079	0.268	6.42e-63	2
Actn4	4.17e-67	-0.31282	0.243	0.482	6.91e-63	2
Prpf40a	5.11e-67	-0.329405	0.473	0.71	8.47e-63	2
Snrpe	1.47e-66	-0.304728	0.936	0.964	2.44e-62	2
Limd2	1.63e-66	0.451898	0.622	0.516	2.69e-62	2
Ptprc	1.93e-66	0.300084	0.993	0.963	3.2e-62	2
Sf3b5	2.31e-66	-0.306199	0.31	0.563	3.83e-62	2
Fkbp3	3.09e-66	-0.33035	0.492	0.716	5.12e-62	2
Srsf10	5.17e-66	-0.312317	0.205	0.435	8.57e-62	2
Rfc1	6.9e-66	-0.319051	0.199	0.426	1.14e-61	2
Cyb5b	8.21e-66	-0.301876	0.192	0.419	1.36e-61	2
Npm1	9.52e-66	-0.32904	0.998	0.998	1.58e-61	2
Pabpn1	1.03e-65	-0.29901	0.251	0.49	1.71e-61	2
Taf10	2.13e-65	-0.33007	0.583	0.776	3.52e-61	2
Ppih	2.28e-65	-0.270422	0.112	0.313	3.78e-61	2
Fkbp5	2.84e-65	-0.327828	0.189	0.409	4.7e-61	2
Mat2a	3.11e-65	-0.309927	0.154	0.367	5.16e-61	2
Tgfb1	3.71e-65	-0.296874	0.252	0.497	6.15e-61	2
Lef1	5.26e-65	0.575891	0.549	0.424	8.72e-61	2
Phb2	8.6e-65	-0.323585	0.311	0.552	1.43e-60	2
Pole4	9.09e-65	-0.28176	0.159	0.374	1.51e-60	2
Nsun2	1.07e-64	-0.279218	0.093	0.286	1.78e-60	2
Cdk2ap1	1.26e-64	-0.263108	0.088	0.277	2.09e-60	2
Psmd8	1.32e-64	-0.296374	0.351	0.604	2.18e-60	2
Mrpl28	1.41e-64	-0.261074	0.109	0.308	2.34e-60	2
Gnl3	1.61e-64	-0.331643	0.13	0.331	2.67e-60	2
Mdh2	1.71e-64	-0.321057	0.5	0.724	2.84e-60	2
2410006H16Rik	1.85e-64	0.461626	0.647	0.568	3.06e-60	2
Mydgf	2.58e-64	-0.274289	0.105	0.299	4.27e-60	2
Ap2m1	2.68e-64	-0.287945	0.176	0.39	4.44e-60	2
Sh3bgrl3	3.19e-64	-0.300715	0.988	0.991	5.28e-60	2
Nans	3.75e-64	-0.276481	0.165	0.381	6.22e-60	2
Exosc8	4.83e-64	-0.291821	0.235	0.468	8e-60	2
Ap2s1	5.37e-64	-0.302167	0.364	0.607	8.9e-60	2
Romo1	6.24e-64	-0.3059	0.363	0.612	1.03e-59	2
Hsd17b12	6.37e-64	-0.278495	0.116	0.313	1.06e-59	2
Srsf6	6.48e-64	-0.294375	0.189	0.408	1.07e-59	2
Myl6	6.7e-64	-0.301817	0.982	0.989	1.11e-59	2
Abcf1	7.22e-64	-0.296611	0.277	0.525	1.2e-59	2
Jak1	8.4e-64	0.362363	0.86	0.797	1.39e-59	2
Uck2	9.64e-64	-0.285598	0.135	0.339	1.6e-59	2
Rpa1	9.66e-64	-0.290372	0.163	0.376	1.6e-59	2
Caprin1	1.05e-63	-0.310956	0.335	0.586	1.74e-59	2
Ostc	1.68e-63	-0.306947	0.256	0.487	2.79e-59	2
Nars	1.77e-63	-0.315668	0.163	0.37	2.93e-59	2
Eif6	1.88e-63	-0.300669	0.216	0.441	3.12e-59	2
Pold2	1.92e-63	-0.255386	0.082	0.269	3.19e-59	2
Ssr2	2.12e-63	-0.284866	0.157	0.367	3.51e-59	2
Pebp1	2.28e-63	-0.302538	0.397	0.644	3.78e-59	2
Mrps24	2.33e-63	-0.283284	0.194	0.415	3.85e-59	2
Sec13	2.44e-63	-0.255698	0.114	0.312	4.04e-59	2
Ndufc2	4.46e-63	-0.297533	0.322	0.564	7.39e-59	2
Nsd3	4.78e-63	0.36176	0.816	0.744	7.92e-59	2
mt-Nd2	6.09e-63	-0.433121	0.983	0.987	1.01e-58	2
Rabgap1l	6.2e-63	0.384544	0.791	0.686	1.03e-58	2
Stub1	7.19e-63	-0.269393	0.133	0.338	1.19e-58	2
Id2	1.01e-62	-0.453385	0.613	0.79	1.68e-58	2
Hnrnpa1	1.23e-62	-0.305119	0.826	0.905	2.04e-58	2
Glrx	1.57e-62	-0.296873	0.253	0.491	2.6e-58	2
Psmb7	1.58e-62	-0.268064	0.135	0.336	2.62e-58	2
Glrx3	1.68e-62	-0.303805	0.339	0.58	2.79e-58	2
Slc1a5	1.92e-62	-0.293707	0.143	0.347	3.19e-58	2
Rpa2	2.29e-62	-0.269898	0.094	0.282	3.8e-58	2
Wdr1	4.83e-62	-0.306539	0.33	0.571	8.01e-58	2
Eif2s2	9.7e-62	-0.372558	0.712	0.833	1.61e-57	2
Lcp1	1.43e-61	-0.293419	0.872	0.932	2.37e-57	2
Psma6	1.9e-61	-0.283719	0.26	0.499	3.15e-57	2
Ccr2	2.06e-61	-0.320872	0.202	0.426	3.41e-57	2
Slc7a1	2.53e-61	-0.281199	0.099	0.286	4.2e-57	2
Mrpl57	2.86e-61	-0.28629	0.197	0.414	4.74e-57	2
Sf3a3	4.01e-61	-0.256507	0.125	0.321	6.64e-57	2
Paics	4.43e-61	-0.287531	0.191	0.407	7.35e-57	2
Plxdc2	4.66e-61	-0.355622	0.229	0.451	7.72e-57	2
Tomm5	4.67e-61	-0.324273	0.213	0.429	7.74e-57	2
Npc2	5.24e-61	0.385602	0.782	0.714	8.68e-57	2
Gzmc	7.02e-61	-1.49648	0.421	0.554	1.16e-56	2
Atp2a2	8.58e-61	-0.272685	0.112	0.302	1.42e-56	2
Ssb	1.14e-60	-0.307488	0.496	0.722	1.89e-56	2
Gtf2h5	1.54e-60	-0.266564	0.22	0.449	2.56e-56	2
Stip1	1.86e-60	-0.264326	0.136	0.336	3.08e-56	2
Psma5	1.94e-60	-0.287555	0.275	0.511	3.22e-56	2
Lrrc59	2.03e-60	-0.262158	0.101	0.286	3.36e-56	2
Vcp	3.12e-60	-0.323353	0.419	0.642	5.17e-56	2
Cd27	3.46e-60	0.326624	0.314	0.17	5.74e-56	2
Tsn	3.8e-60	-0.273631	0.305	0.548	6.3e-56	2
Rbmxl1	5.09e-60	-0.251606	0.095	0.278	8.43e-56	2
Rex1bd	6e-60	-0.275613	0.188	0.399	9.94e-56	2
Gtf2f1	6.33e-60	-0.253929	0.13	0.326	1.05e-55	2
Eri1	7.03e-60	-0.264709	0.116	0.307	1.17e-55	2
Csrp1	7.23e-60	-0.273791	0.127	0.321	1.2e-55	2
Uchl5	8.3e-60	-0.253138	0.124	0.321	1.38e-55	2
Ppm1h	1e-59	0.346098	0.779	0.683	1.66e-55	2
Psmd6	1.16e-59	-0.267089	0.138	0.332	1.92e-55	2
Pfdn6	1.87e-59	-0.267367	0.156	0.357	3.1e-55	2
Ube2n	2.11e-59	-0.283717	0.243	0.467	3.49e-55	2
Psmc1	2.42e-59	-0.264814	0.155	0.357	4.02e-55	2
Mrpl17	2.6e-59	-0.250459	0.095	0.276	4.31e-55	2
Naa10	3.06e-59	-0.2578	0.166	0.373	5.07e-55	2
Snf8	4.6e-59	-0.260697	0.202	0.42	7.62e-55	2
Akt1	5.63e-59	-0.250364	0.106	0.292	9.34e-55	2
Psmc4	6.52e-59	-0.2621	0.153	0.354	1.08e-54	2
Psip1	6.78e-59	-0.301007	0.258	0.483	1.12e-54	2
Hdac1	7.67e-59	-0.275309	0.254	0.481	1.27e-54	2
Bcl7c	7.83e-59	-0.271103	0.181	0.388	1.3e-54	2
Osbpl3	8.64e-59	-0.30165	0.224	0.444	1.43e-54	2
mt-Nd4l	8.64e-59	-0.303684	0.192	0.401	1.43e-54	2
Psmc5	1.2e-58	-0.260159	0.149	0.348	1.98e-54	2
Ssr1	1.42e-58	-0.278504	0.169	0.368	2.35e-54	2
Polr2k	1.51e-58	-0.258051	0.177	0.388	2.51e-54	2
Chchd1	2.51e-58	-0.261954	0.152	0.348	4.15e-54	2
Txnl4a	2.71e-58	-0.251096	0.114	0.301	4.49e-54	2
Mif	2.94e-58	-0.282109	0.99	0.994	4.87e-54	2
Plp2	2.98e-58	-0.257213	0.147	0.345	4.93e-54	2
Rwdd1	3.53e-58	-0.277661	0.352	0.593	5.85e-54	2
Lsm8	3.96e-58	-0.269367	0.181	0.39	6.56e-54	2
Uba2	7.46e-58	-0.260817	0.169	0.371	1.24e-53	2
Rad50	8.51e-58	-0.273392	0.18	0.387	1.41e-53	2
1810037I17Rik	9.48e-58	-0.317119	0.43	0.649	1.57e-53	2
Hmgcr	9.76e-58	-0.269957	0.098	0.277	1.62e-53	2
Lbr	1.08e-57	-0.299124	0.254	0.478	1.79e-53	2
Hspa4	1.09e-57	-0.287565	0.332	0.572	1.8e-53	2
Cops6	1.22e-57	-0.261048	0.173	0.377	2.02e-53	2
Hnrnpk	1.24e-57	-0.306667	0.713	0.846	2.05e-53	2
Hnrnpf	1.54e-57	-0.298204	0.912	0.938	2.55e-53	2
Parp1	2.08e-57	-0.260837	0.122	0.309	3.45e-53	2
Rnaseh2c	2.31e-57	-0.268561	0.196	0.408	3.83e-53	2
Tomm6	2.51e-57	-0.2792	0.32	0.56	4.16e-53	2
Stk39	3.4e-57	0.347372	0.85	0.758	5.63e-53	2
Srsf4	4e-57	-0.278011	0.169	0.368	6.62e-53	2
Clic4	5.83e-57	-0.26631	0.116	0.302	9.67e-53	2
Ms4a6b	9.92e-57	0.321679	0.864	0.776	1.64e-52	2
Fgl2	1.08e-56	-0.281244	0.116	0.299	1.78e-52	2
Etf1	1.11e-56	-0.290468	0.232	0.442	1.84e-52	2
Tardbp	1.12e-56	-0.270945	0.154	0.347	1.86e-52	2
Pabpc4	2e-56	-0.252608	0.097	0.271	3.32e-52	2
Psmd12	2.36e-56	-0.266324	0.18	0.381	3.91e-52	2
Atp5a1	3.07e-56	-0.290699	0.791	0.884	5.08e-52	2
Vps37b	3.34e-56	0.469287	0.541	0.42	5.54e-52	2
mt-Atp6	3.45e-56	-0.376074	1	0.999	5.71e-52	2
Arf1	3.76e-56	-0.291901	0.391	0.628	6.23e-52	2
Phf5a	4.33e-56	-0.266337	0.216	0.429	7.18e-52	2
Polr2j	4.39e-56	-0.262291	0.226	0.444	7.27e-52	2
Krtcap2	4.92e-56	-0.314137	0.694	0.831	8.15e-52	2
Gm42047	6.06e-56	-0.323806	0.101	0.274	1e-51	2
Ddx27	6.54e-56	-0.255654	0.147	0.339	1.08e-51	2
Bst2	7.36e-56	-0.293007	0.266	0.488	1.22e-51	2
Cenpx	7.56e-56	-0.266896	0.207	0.417	1.25e-51	2
Tmed9	7.79e-56	-0.28923	0.371	0.607	1.29e-51	2
Pds5a	8.25e-56	-0.290659	0.31	0.543	1.37e-51	2
Cdkn1b	1.02e-55	0.348747	0.393	0.247	1.69e-51	2
Vars	1.28e-55	-0.261315	0.18	0.385	2.12e-51	2
Lsm5	1.55e-55	-0.309088	0.488	0.695	2.58e-51	2
Pfdn1	1.6e-55	-0.26237	0.27	0.497	2.64e-51	2
Tmed2	1.76e-55	-0.304676	0.446	0.668	2.92e-51	2
Atp10a	2.16e-55	-0.303613	0.322	0.555	3.58e-51	2
Polr3k	2.86e-55	-0.251045	0.14	0.327	4.74e-51	2
Vdac2	3.95e-55	-0.279434	0.384	0.621	6.55e-51	2
Rbbp8	5.05e-55	-0.259249	0.12	0.301	8.36e-51	2
mt-Nd4	5.14e-55	-0.403032	0.996	0.995	8.52e-51	2
Eif1a	5.57e-55	-0.256135	0.122	0.304	9.22e-51	2
Dhx15	6.24e-55	-0.268268	0.201	0.409	1.03e-50	2
Gsr	6.94e-55	-0.250958	0.122	0.305	1.15e-50	2
Mrps14	1.17e-54	-0.254615	0.271	0.499	1.94e-50	2
Pcbd2	1.26e-54	-0.250975	0.15	0.341	2.09e-50	2
Anapc11	1.66e-54	-0.288221	0.368	0.596	2.74e-50	2
Gbp7	2.01e-54	-0.3124	0.238	0.444	3.34e-50	2
Lman2	2.57e-54	-0.268255	0.22	0.427	4.25e-50	2
Ak2	2.76e-54	-0.259029	0.169	0.364	4.57e-50	2
Lamtor4	3.81e-54	-0.271361	0.286	0.509	6.32e-50	2
Ppm1g	4.49e-54	-0.25941	0.224	0.435	7.45e-50	2
Cct2	4.86e-54	-0.300128	0.508	0.713	8.06e-50	2
Mbnl1	6.36e-54	0.262916	0.992	0.958	1.05e-49	2
Hnrnpm	6.68e-54	-0.298716	0.559	0.751	1.11e-49	2
Mt2	8.3e-54	-0.284313	0.225	0.433	1.38e-49	2
Stoml2	8.76e-54	-0.251581	0.165	0.357	1.45e-49	2
Gm43305	8.77e-54	-0.293859	0.143	0.329	1.45e-49	2
Ctcf	9.38e-54	-0.291035	0.357	0.587	1.56e-49	2
Gmps	1.56e-53	-0.25977	0.187	0.384	2.58e-49	2
Cndp2	1.59e-53	-0.252322	0.136	0.318	2.63e-49	2
Cox7a2	2.72e-53	-0.278194	0.853	0.917	4.52e-49	2
Utp3	7.84e-53	-0.259012	0.22	0.428	1.3e-48	2
Smchd1	7.91e-53	-0.322552	0.543	0.729	1.31e-48	2
Reep5	8.16e-53	-0.308332	0.551	0.733	1.35e-48	2
Smc6	1.31e-52	-0.276001	0.303	0.526	2.16e-48	2
Mt1	1.33e-52	-0.317936	0.687	0.812	2.2e-48	2
Mrpl54	1.42e-52	-0.254621	0.288	0.51	2.36e-48	2
Gas5	1.61e-52	0.311154	0.938	0.885	2.67e-48	2
Luc7l3	1.68e-52	-0.256453	0.294	0.522	2.79e-48	2
Il2ra	1.99e-52	-0.42613	0.421	0.622	3.29e-48	2
Arsb	2.06e-52	-0.283871	0.101	0.273	3.41e-48	2
S100a4	2.12e-52	-0.599411	0.507	0.656	3.51e-48	2
Cish	2.42e-52	-0.264812	0.294	0.52	4e-48	2
Fxyd5	3.38e-52	0.326743	0.997	0.984	5.6e-48	2
Ndufa4	4.02e-52	-0.376694	0.588	0.738	6.66e-48	2
Capza2	4.28e-52	-0.272576	0.39	0.621	7.1e-48	2
Mrps15	5e-52	-0.256853	0.205	0.403	8.29e-48	2
Ifngr1	5.14e-52	0.334388	0.756	0.681	8.52e-48	2
Rrp1	9.17e-52	-0.260098	0.266	0.481	1.52e-47	2
Uqcrc1	1.27e-51	-0.252277	0.212	0.412	2.11e-47	2
Dynll1	2.44e-51	-0.333118	0.707	0.82	4.04e-47	2
Trp53	2.81e-51	-0.253452	0.3	0.523	4.66e-47	2
S100a6	3.35e-51	-0.438667	0.955	0.945	5.55e-47	2
Prkcq	3.62e-51	0.342946	0.744	0.67	6e-47	2
Fkbp8	4.09e-51	-0.251734	0.323	0.547	6.78e-47	2
Pvt1	6.95e-51	-0.345428	0.375	0.592	1.15e-46	2
Rras2	9.18e-51	-0.270343	0.199	0.393	1.52e-46	2
Eef1g	9.74e-51	-0.261703	0.947	0.964	1.61e-46	2
1110004F10Rik	1.02e-50	-0.258336	0.34	0.562	1.69e-46	2
Erp29	1.72e-50	-0.263606	0.295	0.51	2.85e-46	2
Cox17	1.94e-50	-0.287895	0.44	0.657	3.21e-46	2
Eif3c	2.3e-50	-0.311686	0.621	0.779	3.81e-46	2
St13	2.5e-50	-0.265442	0.263	0.47	4.14e-46	2
Sumo2	2.53e-50	-0.303347	0.871	0.903	4.2e-46	2
Slfn2	4.22e-50	0.378632	0.613	0.516	6.99e-46	2
Emp3	5.4e-50	-0.325799	0.587	0.745	8.96e-46	2
Rer1	1.23e-49	-0.254657	0.267	0.478	2.04e-45	2
Ptpn22	1.36e-49	0.384717	0.658	0.605	2.25e-45	2
Atp5md	1.92e-49	-0.278826	0.541	0.733	3.19e-45	2
Malt1	2.62e-49	0.43081	0.581	0.483	4.34e-45	2
Cst3	2.98e-49	-0.271473	0.202	0.394	4.95e-45	2
Tmem167	5.54e-49	-0.265973	0.442	0.661	9.18e-45	2
Kdelr2	6.43e-49	-0.253076	0.171	0.353	1.07e-44	2
Psma2	9.28e-49	-0.29506	0.738	0.839	1.54e-44	2
Gpx1	1.43e-48	-0.260549	0.23	0.424	2.37e-44	2
Coro2a	2.13e-48	-0.275392	0.271	0.481	3.53e-44	2
Uqcrb	2.92e-48	-0.250123	0.318	0.535	4.84e-44	2
Itk	3.23e-48	0.26851	0.973	0.899	5.35e-44	2
Fubp1	6.04e-48	-0.264361	0.391	0.615	1e-43	2
Hnrnpul1	1.02e-47	-0.254374	0.26	0.46	1.7e-43	2
Slc16a3	4.67e-47	-0.261789	0.209	0.395	7.74e-43	2
Cblb	4.8e-47	0.302103	0.839	0.743	7.96e-43	2
Lgals3	7.73e-47	-0.448151	0.565	0.709	1.28e-42	2
Prelid1	1.18e-46	-0.254193	0.886	0.936	1.95e-42	2
Ddx46	1.24e-46	-0.251807	0.262	0.462	2.05e-42	2
Myl12a	2.74e-46	-0.277938	0.657	0.812	4.54e-42	2
Ppp1ca	3.6e-46	-0.255852	0.891	0.936	5.96e-42	2
Tma7	4.2e-46	-0.267418	0.711	0.841	6.95e-42	2
Itgb1	4.2e-46	-0.297895	0.298	0.499	6.95e-42	2
Lockd	4.54e-46	-0.311726	0.29	0.481	7.53e-42	2
Crebrf	5.15e-46	0.342303	0.425	0.296	8.53e-42	2
Zmiz1	6.08e-46	-0.252438	0.261	0.462	1.01e-41	2
Capzb	1.09e-45	-0.2596	0.736	0.863	1.8e-41	2
Aprt	1.19e-45	-0.277971	0.45	0.661	1.96e-41	2
Selenos	4.33e-45	-0.253856	0.173	0.346	7.17e-41	2
Sp100	2.85e-43	0.321207	0.734	0.677	4.73e-39	2
Tmem71	1.08e-42	0.296656	0.339	0.212	1.78e-38	2
Gm47283	1.27e-42	-0.274495	0.121	0.275	2.1e-38	2
Cox7b	1.6e-42	-0.260707	0.796	0.875	2.64e-38	2
Jund	2.3e-41	-0.276423	0.952	0.962	3.8e-37	2
Klrd1	2.48e-41	0.288046	0.798	0.701	4.1e-37	2
4933406I18Rik	5.13e-41	0.385039	0.526	0.432	8.5e-37	2
Snd1	6.48e-41	-0.25416	0.345	0.542	1.07e-36	2
Sqstm1	2.38e-40	0.361545	0.493	0.383	3.94e-36	2
Clk1	3.15e-40	0.330867	0.605	0.54	5.22e-36	2
Gnb2	9.69e-40	-0.270888	0.762	0.856	1.61e-35	2
Celf2	1.57e-39	0.253168	0.96	0.906	2.6e-35	2
Mndal	1.66e-39	0.353727	0.556	0.469	2.76e-35	2
Ablim1	6.2e-39	0.284309	0.766	0.714	1.03e-34	2
Emb	6.39e-39	0.368178	0.673	0.632	1.06e-34	2
H2afv	9.07e-39	-0.410028	0.602	0.714	1.5e-34	2
Fus	2.85e-38	-0.257314	0.598	0.753	4.72e-34	2
Tpr	2.87e-38	-0.250737	0.724	0.836	4.76e-34	2
Nop10	3.11e-38	-0.270542	0.608	0.757	5.16e-34	2
Ifi203	6.62e-38	0.315527	0.4	0.283	1.1e-33	2
Clta	4.88e-37	0.265757	0.886	0.841	8.08e-33	2
Hip1	3.42e-36	-0.257655	0.215	0.379	5.67e-32	2
Traf1	1.01e-35	0.332583	0.494	0.399	1.67e-31	2
Phf21a	2.16e-35	0.336813	0.553	0.471	3.58e-31	2
Rabac1	2.65e-35	0.33367	0.527	0.452	4.39e-31	2
Gm26917	1.22e-34	-0.364683	0.558	0.694	2.02e-30	2
Tecpr1	3.25e-34	0.316181	0.382	0.277	5.39e-30	2
Ets1	5.75e-34	0.329497	0.537	0.467	9.53e-30	2
Fam169b	2.54e-33	0.374116	0.616	0.58	4.2e-29	2
BE692007	5.11e-33	0.257152	0.282	0.178	8.46e-29	2
Camk4	1.98e-32	0.252667	0.892	0.813	3.28e-28	2
Lncpint	2e-32	0.32838	0.515	0.433	3.31e-28	2
Asap1	3.53e-32	0.32321	0.31	0.208	5.85e-28	2
Nkg7	8.77e-31	-0.279015	0.916	0.935	1.45e-26	2
Sntb1	1.42e-30	0.315854	0.284	0.185	2.35e-26	2
Bcas3	3.57e-30	0.306944	0.408	0.309	5.91e-26	2
Clint1	1.12e-29	0.309275	0.515	0.449	1.86e-25	2
Fam189b	2.88e-29	0.267471	0.312	0.213	4.77e-25	2
Klf13	1.45e-28	0.299183	0.527	0.464	2.41e-24	2
Plac8	2.66e-28	0.267016	0.918	0.829	4.41e-24	2
Iigp1	3.57e-28	-0.383697	0.265	0.395	5.92e-24	2
Dpp4	5.58e-28	0.301667	0.434	0.349	9.24e-24	2
Nfkbia	3.67e-27	0.346644	0.428	0.338	6.08e-23	2
Zc3hav1	5.11e-27	0.288293	0.62	0.596	8.47e-23	2
Tnik	9.22e-26	0.294775	0.436	0.354	1.53e-21	2
Rhoh	1.45e-24	0.277027	0.616	0.602	2.41e-20	2
Man1a	1.66e-24	0.319833	0.475	0.407	2.75e-20	2
Mbnl2	1.99e-24	0.268362	0.465	0.386	3.3e-20	2
Ankrd12	2.26e-24	0.286417	0.513	0.445	3.74e-20	2
Tut4	4.24e-24	0.269669	0.543	0.482	7.02e-20	2
Itpkb	4.38e-24	0.281716	0.372	0.286	7.26e-20	2
Apbb1ip	6.27e-24	0.271452	0.64	0.628	1.04e-19	2
Arhgap45	1.88e-23	0.276962	0.55	0.506	3.11e-19	2
Wipf1	1.75e-22	0.283016	0.588	0.575	2.9e-18	2
Slc2a3	6.77e-22	0.284022	0.444	0.375	1.12e-17	2
Cd226	6.89e-22	0.309965	0.516	0.471	1.14e-17	2
Ikzf3	1.93e-21	0.2801	0.346	0.267	3.2e-17	2
Pde7a	3.08e-21	0.261696	0.535	0.486	5.1e-17	2
Kcnq5	5.65e-21	-0.269657	0.747	0.787	9.37e-17	2
Peak1	7.28e-20	0.274106	0.485	0.43	1.21e-15	2
Stk4	2.49e-19	0.250021	0.493	0.446	4.13e-15	2
Rsrp1	3.37e-19	0.266274	0.478	0.428	5.59e-15	2
Cd69	5.85e-19	0.285987	0.436	0.378	9.7e-15	2
Cd28	7.29e-19	0.264224	0.521	0.486	1.21e-14	2
Bnip3l	2.97e-17	0.273157	0.521	0.513	4.92e-13	2
Hivep2	9.87e-16	0.250289	0.351	0.288	1.64e-11	2
Gbe1	1.3e-15	0.288676	0.316	0.253	2.15e-11	2
Ccl5	1.54e-12	0.433201	0.269	0.212	2.56e-08	2
Fgf13	4.38e-12	0.315033	0.374	0.327	7.25e-08	2
Arl6ip1	4.05e-10	-0.290506	0.741	0.763	6.72e-06	2
Pola1	5.36e-248	0.75443	0.771	0.41	8.88e-244	3
Trbc2	7.39e-246	-0.559961	1	1	1.22e-241	3
Rad51b	1.5e-189	0.75501	0.786	0.501	2.48e-185	3
Ncl	3.33e-167	0.588565	0.995	0.96	5.52e-163	3
Dtl	2.39e-163	0.525974	0.628	0.316	3.96e-159	3
Tmsb4x	2.52e-144	-0.468127	1	1	4.17e-140	3
Kcnq5	1.01e-137	0.586398	0.911	0.769	1.67e-133	3
AW112010	2.24e-132	-0.562365	0.933	0.978	3.71e-128	3
Pole	4.2e-128	0.393649	0.485	0.227	6.95e-124	3
Nasp	2.07e-127	0.500257	0.869	0.668	3.44e-123	3
Hells	1.76e-124	0.453941	0.615	0.342	2.91e-120	3
Cdc6	3.33e-123	0.356374	0.388	0.16	5.51e-119	3
Atad2	4.74e-118	0.490411	0.729	0.469	7.85e-114	3
Pcna	1.47e-114	0.476133	0.733	0.476	2.44e-110	3
Rif1	7.06e-113	0.440623	0.606	0.348	1.17e-108	3
Prim2	1.94e-111	0.401997	0.513	0.266	3.21e-107	3
Mcm5	2.12e-110	0.419763	0.609	0.353	3.51e-106	3
Rps15	3.62e-110	0.252607	1	1	6e-106	3
Uhrf1	5.45e-110	0.413027	0.586	0.325	9.04e-106	3
Ubb	7.54e-110	-0.427088	0.978	0.994	1.25e-105	3
Cd3g	1.98e-109	-0.467773	0.959	0.99	3.28e-105	3
Atad5	1.33e-106	0.375045	0.483	0.241	2.21e-102	3
Rps15a	1.15e-102	-0.276315	1	1	1.9e-98	3
Itm2b	4.42e-101	-0.468648	0.76	0.894	7.33e-97	3
Mcm6	1.46e-100	0.435811	0.68	0.437	2.42e-96	3
Clspn	4.39e-98	0.430638	0.639	0.392	7.28e-94	3
Mcm3	5.26e-98	0.423359	0.737	0.51	8.72e-94	3
Hsp90aa1	9.15e-97	0.418376	0.966	0.904	1.52e-92	3
Btf3	3.48e-91	-0.377119	0.925	0.982	5.77e-87	3
Brca1	3.21e-90	0.342352	0.426	0.214	5.32e-86	3
Hsp90ab1	6.25e-89	0.271115	1	1	1.04e-84	3
Gm26917	1.58e-86	0.545936	0.808	0.666	2.62e-82	3
Mcm7	8.3e-86	0.392688	0.671	0.443	1.37e-81	3
Brip1	4.86e-85	0.339767	0.478	0.257	8.06e-81	3
S100a10	2.91e-84	-0.474611	0.967	0.99	4.82e-80	3
Arl6ip1	5.49e-84	-0.602615	0.617	0.776	9.11e-80	3
H2-K1	5.59e-84	-0.341686	0.999	0.999	9.26e-80	3
Gmds	2.34e-83	0.406292	0.713	0.507	3.88e-79	3
Rfc1	4.16e-83	0.361931	0.606	0.382	6.89e-79	3
Mms22l	4.16e-83	0.359976	0.519	0.3	6.9e-79	3
Nolc1	2.1e-80	0.383838	0.563	0.34	3.48e-76	3
Lig1	3.09e-80	0.366252	0.631	0.4	5.11e-76	3
Dnmt1	2.61e-79	0.356276	0.655	0.431	4.32e-75	3
Ncapg2	4.86e-79	0.32438	0.497	0.279	8.05e-75	3
Nsd2	7.56e-79	0.362396	0.693	0.472	1.25e-74	3
mt-Nd3	5.73e-78	0.290317	0.953	0.889	9.49e-74	3
Cdk6	1.34e-77	0.446858	0.873	0.762	2.22e-73	3
Mcm4	7.51e-77	0.345409	0.573	0.356	1.24e-72	3
Rrm1	3.27e-76	0.356766	0.656	0.432	5.41e-72	3
Topbp1	7.28e-76	0.339466	0.58	0.359	1.21e-71	3
Immp2l	2.43e-75	0.408634	0.538	0.326	4.03e-71	3
Ipo5	4.65e-73	0.299856	0.458	0.258	7.71e-69	3
Zfp367	6.72e-73	0.335804	0.525	0.313	1.11e-68	3
Clic1	2.95e-72	-0.350474	0.946	0.977	4.89e-68	3
Cbx5	3.47e-72	0.327115	0.56	0.349	5.74e-68	3
Rpl31	1.08e-71	0.265911	0.999	0.995	1.78e-67	3
Eef1g	1.32e-71	0.304345	0.983	0.96	2.18e-67	3
Serbp1	1.47e-71	0.293904	0.992	0.975	2.43e-67	3
Baz1b	6.6e-71	0.34865	0.649	0.443	1.09e-66	3
Mcm2	7.9e-71	0.293802	0.42	0.231	1.31e-66	3
Elmo1	5.03e-70	0.326402	0.954	0.883	8.33e-66	3
Diaph3	4.51e-69	0.364821	0.658	0.45	7.48e-65	3
Set	7.28e-69	0.314744	0.961	0.891	1.21e-64	3
Eif4g1	1.14e-68	0.353831	0.621	0.419	1.89e-64	3
Arpc3	1.97e-68	-0.352866	0.759	0.881	3.27e-64	3
Rbm3	2.96e-68	-0.317597	0.978	0.995	4.9e-64	3
Plac8	1.93e-67	-0.484035	0.726	0.85	3.2e-63	3
Ipo7	2.89e-67	0.298715	0.47	0.275	4.79e-63	3
AI506816	2.77e-65	0.320167	0.516	0.321	4.6e-61	3
Smarcc1	3.68e-65	0.320437	0.575	0.377	6.1e-61	3
H3f3b	3.73e-65	-0.343425	0.983	0.993	6.19e-61	3
Mybbp1a	4.36e-65	0.323952	0.46	0.273	7.22e-61	3
Dhfr	2.94e-64	0.280391	0.379	0.206	4.87e-60	3
Nop56	3.61e-64	0.338487	0.581	0.378	5.98e-60	3
Ms4a4b	7.5e-63	-0.376192	0.93	0.961	1.24e-58	3
Nap1l1	4.98e-62	0.292555	0.941	0.858	8.25e-58	3
E2f3	1.44e-61	0.291249	0.446	0.263	2.39e-57	3
Cep128	1.01e-60	0.324702	0.493	0.304	1.67e-56	3
Wdr76	3.52e-60	0.251201	0.412	0.231	5.83e-56	3
Fkbp5	5.31e-60	0.310977	0.562	0.368	8.8e-56	3
Dhx9	6.29e-60	0.323594	0.631	0.44	1.04e-55	3
Mthfd1l	1.58e-59	0.307437	0.652	0.462	2.62e-55	3
Cdk2ap2	2.71e-59	-0.351302	0.362	0.563	4.49e-55	3
Faf1	3.53e-59	0.311982	0.609	0.42	5.85e-55	3
Srgn	5.92e-59	-0.363754	0.786	0.887	9.81e-55	3
Mbnl3	1.21e-58	0.268897	0.383	0.213	2e-54	3
Exoc4	8.66e-58	0.346098	0.889	0.802	1.44e-53	3
Chaf1a	1.48e-57	0.254011	0.38	0.213	2.46e-53	3
Ankrd17	1.92e-57	0.319068	0.743	0.593	3.18e-53	3
Nop58	5.54e-57	0.330558	0.589	0.402	9.18e-53	3
H3f3a	2.25e-56	-0.299852	0.913	0.973	3.72e-52	3
Tfrc	2.52e-56	0.305486	0.581	0.393	4.18e-52	3
Ddx21	1.13e-55	0.307761	0.599	0.412	1.87e-51	3
Gm47283	1.34e-55	0.307578	0.415	0.243	2.22e-51	3
Hspa9	1.61e-55	0.298468	0.585	0.396	2.67e-51	3
Diaph2	1.82e-55	0.3353	0.656	0.48	3.01e-51	3
Sod1	2.58e-54	0.312021	0.534	0.359	4.27e-50	3
Tbc1d5	2.94e-54	0.294042	0.625	0.438	4.87e-50	3
S100a11	2.38e-53	-0.375272	0.782	0.881	3.94e-49	3
Adk	3.86e-53	0.253534	0.342	0.19	6.41e-49	3
Fam111a	5.56e-53	0.263786	0.478	0.299	9.22e-49	3
Hnrnpu	1.94e-52	0.289441	0.909	0.84	3.21e-48	3
Dock10	6.02e-52	0.25683	0.983	0.955	9.98e-48	3
Shisa5	9.85e-52	-0.331236	0.9	0.945	1.63e-47	3
Hnrnpab	1.63e-51	0.288631	0.866	0.749	2.7e-47	3
Btg1	2.71e-51	-0.456642	0.416	0.569	4.49e-47	3
Cenpa	1.11e-50	-0.475868	0.22	0.383	1.84e-46	3
Cdv3	1.17e-50	0.31062	0.602	0.429	1.94e-46	3
Lcp1	1.67e-50	0.261146	0.962	0.922	2.76e-46	3
Paics	2.21e-50	0.259432	0.55	0.367	3.66e-46	3
Cenpp	5.74e-50	0.256333	0.456	0.279	9.52e-46	3
Tcerg1	1.59e-49	0.281329	0.528	0.353	2.64e-45	3
Naa50	1.61e-49	0.252612	0.47	0.299	2.67e-45	3
Smc6	2.7e-49	0.288373	0.655	0.487	4.47e-45	3
Smchd1	1.35e-48	0.279703	0.815	0.699	2.23e-44	3
Rpa1	2.08e-48	0.26725	0.51	0.338	3.45e-44	3
Rps6ka5	3.32e-48	0.273701	0.478	0.305	5.51e-44	3
Xpo1	5.77e-48	0.27309	0.539	0.367	9.56e-44	3
Nhp2	9.35e-48	0.277571	0.68	0.507	1.55e-43	3
Klrd1	2.01e-47	-0.417608	0.602	0.722	3.33e-43	3
Eif3b	3.05e-47	0.299101	0.521	0.359	5.05e-43	3
Dhx15	7.9e-47	0.28026	0.54	0.372	1.31e-42	3
Gm42418	1.17e-46	0.269242	0.986	0.977	1.94e-42	3
Eif3a	2.91e-46	0.300458	0.808	0.709	4.82e-42	3
Ecpas	3.36e-46	0.262003	0.506	0.339	5.58e-42	3
Hspd1	5.98e-46	0.302675	0.751	0.628	9.91e-42	3
Ssrp1	7.39e-46	0.293404	0.703	0.559	1.23e-41	3
H2-Q7	9.52e-46	-0.311176	0.886	0.927	1.58e-41	3
Ulbp1	1.22e-45	0.256255	0.466	0.3	2.03e-41	3
Dennd1a	2.1e-45	0.282034	0.657	0.492	3.47e-41	3
Ube2c	4.69e-45	-0.639818	0.252	0.398	7.77e-41	3
Hdlbp	2.07e-44	0.260501	0.533	0.369	3.44e-40	3
Sri	2.22e-44	-0.290314	0.553	0.698	3.69e-40	3
Hnrnpa3	7.36e-44	0.256057	0.927	0.876	1.22e-39	3
Suz12	1.34e-43	0.270472	0.64	0.48	2.21e-39	3
Tmem163	4.58e-43	0.330221	0.693	0.56	7.59e-39	3
Atxn1	8.1e-43	0.252961	0.924	0.865	1.34e-38	3
Sumo2	1.65e-42	-0.275189	0.818	0.909	2.73e-38	3
Syncrip	9.94e-42	0.282281	0.695	0.56	1.65e-37	3
Vcp	3.04e-41	0.301641	0.729	0.608	5.04e-37	3
Pds5a	5.24e-41	0.256648	0.661	0.504	8.69e-37	3
Mrpl12	5.24e-41	0.27511	0.607	0.456	8.69e-37	3
Cd48	8.72e-41	-0.310784	0.376	0.523	1.44e-36	3
Atp6v0e	1.19e-40	-0.282038	0.454	0.599	1.97e-36	3
Arhgdia	2.86e-40	0.306054	0.863	0.787	4.75e-36	3
Ms4a6b	4.52e-40	-0.31486	0.676	0.797	7.5e-36	3
Pfn1	6.83e-40	-0.282362	0.998	0.998	1.13e-35	3
H2-D1	1.57e-39	-0.261723	0.972	0.988	2.6e-35	3
Trac	1.76e-39	-0.302501	0.78	0.867	2.91e-35	3
Pa2g4	3.73e-39	0.280105	0.699	0.561	6.18e-35	3
Emp3	8.66e-39	-0.326878	0.635	0.739	1.43e-34	3
Clta	3.07e-38	-0.263107	0.751	0.856	5.09e-34	3
Rbbp7	3.87e-38	0.253987	0.623	0.472	6.42e-34	3
Stag1	6.12e-38	0.255307	0.801	0.698	1.02e-33	3
Calm2	9.35e-38	-0.34169	0.764	0.823	1.55e-33	3
Caprin1	2.46e-37	0.269468	0.669	0.549	4.08e-33	3
Wdr43	2.78e-37	0.265109	0.522	0.374	4.61e-33	3
Actg1	1.48e-36	-0.292441	1	1	2.45e-32	3
Smyd3	3.38e-36	0.320678	0.753	0.649	5.61e-32	3
Ltb	9.94e-36	-0.380341	0.535	0.656	1.65e-31	3
Nkg7	4.22e-35	-0.319952	0.895	0.937	6.99e-31	3
Fxyd5	7.94e-35	-0.255933	0.967	0.987	1.32e-30	3
Pdcd4	7.02e-33	-0.346808	0.439	0.561	1.16e-28	3
Gmfg	9.66e-33	-0.257292	0.669	0.786	1.6e-28	3
Ifngr1	1.13e-31	-0.301619	0.587	0.7	1.88e-27	3
Ccnd3	1.19e-31	-0.327687	0.653	0.76	1.98e-27	3
Gnb2	1.74e-31	-0.251258	0.779	0.853	2.89e-27	3
Anxa2	3.38e-30	-0.330941	0.75	0.803	5.6e-26	3
Cdkn2d	7.11e-29	-0.254508	0.225	0.348	1.18e-24	3
2410006H16Rik	1.6e-28	-0.282638	0.471	0.587	2.65e-24	3
Plxdc2	7.79e-28	0.258967	0.54	0.417	1.29e-23	3
Pnrc1	8.35e-28	-0.260598	0.421	0.545	1.38e-23	3
Ypel3	1.45e-27	-0.264863	0.189	0.306	2.41e-23	3
Pvt1	1.29e-26	0.26756	0.663	0.56	2.14e-22	3
H2afv	1.37e-26	-0.334581	0.622	0.711	2.27e-22	3
Cks2	1.96e-26	-0.329903	0.433	0.521	3.25e-22	3
Ccnb2	1.1e-25	-0.280578	0.189	0.299	1.83e-21	3
Gimap3	9.47e-25	-0.275272	0.448	0.55	1.57e-20	3
Emb	2.6e-24	-0.279058	0.549	0.645	4.31e-20	3
Tagln2	1.84e-23	-0.262148	0.94	0.942	3.06e-19	3
Slfn2	2.3e-23	-0.253543	0.43	0.536	3.81e-19	3
H2afx	3.95e-23	-0.4726	0.394	0.473	6.54e-19	3
Jpt1	6.85e-23	-0.255503	0.72	0.781	1.14e-18	3
Tubb4b	1.55e-22	-0.432508	0.673	0.704	2.56e-18	3
Il2ra	2.93e-22	0.274008	0.681	0.593	4.86e-18	3
Mir142hg	5.48e-22	-0.251664	0.872	0.907	9.08e-18	3
Epsti1	1.19e-20	-0.286047	0.853	0.884	1.98e-16	3
Cenpf	8.67e-19	-0.431442	0.265	0.343	1.44e-14	3
Id2	1.41e-14	-0.29362	0.751	0.774	2.33e-10	3
Birc5	1.47e-11	-0.294976	0.464	0.495	2.44e-07	3
Ifitm2	5.23e-09	-0.282723	0.886	0.878	8.66e-05	3
Gzma	2.49e-06	-0.262536	0.69	0.595	0.0413001	3
Smc4	7.15e-263	-0.987028	0.459	0.809	1.18e-258	4
Tmsb4x	4.7e-250	0.546743	1	1	7.78e-246	4
S100a6	2.7e-231	1.07903	0.973	0.944	4.48e-227	4
Top2a	5.38e-224	-1.35091	0.445	0.752	8.92e-220	4
[truncated: 4,986 more rows]
