# Supplementary material for: Vaccination rescues dysfunctional T cell therapy by amplifying rare stem-like antitumor CD8+ T cells
Source: Research Square preprint supplement (doi:10.21203/rs.3.rs-8941883/v1), 2026-03-13
Supplement: Supplementary file 2 [file 74545b3956e2d488845f2483.xlsx]

## Sheet: CD45pos_nontumorcells_deg
gene	p_val	avg_log2FC	pct.1	pct.2	p_val_adj	cluster
Chil3	0	3.47455	0.615	0.11	0	0
Mgst1	7.23e-235	3.05921	0.328	0.043	2.33e-230	0
Dmkn	5.15e-140	3.02058	0.282	0.057	1.66e-135	0
Cfb	3.7e-158	3.00102	0.329	0.071	1.2e-153	0
Hp	0	2.99766	0.654	0.126	0	0
Prtn3	3.55e-128	2.92008	0.263	0.054	1.15e-123	0
Plcb1	0	2.77837	0.645	0.144	0	0
Tppp3	7.8e-101	2.64945	0.271	0.072	2.52e-96	0
Ms4a6c	0	2.57148	0.897	0.282	0	0
Cxcl10	3.47e-32	2.50509	0.259	0.137	1.12e-27	0
Phf11d	9.15e-104	2.47254	0.296	0.084	2.95e-99	0
Plac8	0	2.47214	0.975	0.486	0	0
Ly6c2	0	2.46657	0.901	0.352	0	0
Lyz2	0	2.46606	0.996	0.453	0	0
Vcan	0	2.45513	0.746	0.188	0	0
Fcgr1	0	2.4495	0.709	0.2	0	0
Nupr1	5.91e-196	2.4271	0.445	0.11	1.91e-191	0
Mafb	0	2.38889	0.73	0.212	0	0
Clec4a3	1.98e-267	2.38878	0.62	0.173	6.39e-263	0
Ms4a4c	0	2.3547	0.827	0.306	0	0
Clec4a1	2.75e-185	2.31521	0.484	0.14	8.88e-181	0
Ms4a6d	7.3e-270	2.29901	0.675	0.214	2.36e-265	0
Sirpb1c	9.84e-176	2.28282	0.406	0.099	3.18e-171	0
Hacd4	2.56e-111	2.26334	0.327	0.096	8.27e-107	0
Il18	7.14e-146	2.23891	0.372	0.099	2.31e-141	0
Tfec	4.29e-101	2.23062	0.266	0.068	1.38e-96	0
Slfn5	7.56e-258	2.21876	0.653	0.202	2.44e-253	0
Cmklr1	5.14e-83	2.21656	0.258	0.076	1.66e-78	0
Met	1.08e-82	2.19734	0.253	0.074	3.5e-78	0
Ifitm6	1.55e-251	2.16056	0.547	0.132	5.02e-247	0
Ifi213	3.59e-137	2.15872	0.39	0.114	1.16e-132	0
Cybb	0	2.15804	0.858	0.281	0	0
Msr1	2.83e-268	2.15082	0.652	0.181	9.12e-264	0
Spint1	2.33e-102	2.14165	0.336	0.108	7.51e-98	0
Hpse	1.86e-64	2.10728	0.254	0.09	5.99e-60	0
Gbp2	2.33e-103	2.10239	0.431	0.171	7.52e-99	0
Aldh2	5.49e-222	2.10057	0.608	0.202	1.77e-217	0
Dhx58	9.09e-78	2.08359	0.288	0.099	2.93e-73	0
Smpdl3a	6.77e-121	2.0772	0.435	0.163	2.18e-116	0
Gm5150	1.82e-149	2.05029	0.385	0.102	5.86e-145	0
Ifitm3	0	2.04504	0.996	0.525	0	0
Myof	8.91e-216	2.02775	0.608	0.196	2.88e-211	0
Tgfbi	0	2.0257	0.895	0.303	0	0
Cln8	3.94e-68	2.02222	0.285	0.106	1.27e-63	0
Pla2g4a	8.64e-119	2.02146	0.413	0.144	2.79e-114	0
BC028528	7.77e-73	1.98377	0.286	0.101	2.51e-68	0
Irf7	1.01e-185	1.98159	0.586	0.209	3.25e-181	0
Fcgr4	1.21e-117	1.96572	0.298	0.073	3.92e-113	0
Gm21188	2.91e-103	1.96536	0.312	0.091	9.38e-99	0
Ifi27l2a	0	1.9505	0.991	0.553	0	0
Tifab	1.79e-80	1.94131	0.319	0.115	5.77e-76	0
Ifi204	0	1.92766	0.787	0.241	0	0
Ctsc	0	1.92261	0.928	0.441	0	0
Ifi211	5.31e-163	1.91828	0.61	0.267	1.71e-158	0
Ifi209	1.29e-177	1.90744	0.636	0.267	4.15e-173	0
Pstpip2	1.17e-134	1.90021	0.399	0.119	3.77e-130	0
Ptpro	1.04e-142	1.89889	0.487	0.169	3.36e-138	0
Fam241a	7.98e-116	1.89763	0.422	0.155	2.58e-111	0
Sh3bp5	2.06e-52	1.88857	0.254	0.102	6.64e-48	0
Ifi205	3e-120	1.88502	0.366	0.106	9.7e-116	0
Cd302	1.51e-58	1.87533	0.268	0.105	4.87e-54	0
Zbp1	3.52e-234	1.86668	0.742	0.312	1.14e-229	0
Tmem51	4.75e-77	1.85187	0.273	0.088	1.53e-72	0
Lst1	0	1.85085	0.898	0.358	0	0
Rasa4	1.33e-100	1.85025	0.379	0.137	4.28e-96	0
Lrp1	2e-223	1.84616	0.644	0.212	6.46e-219	0
Dok3	3.29e-87	1.84272	0.25	0.068	1.06e-82	0
Oas3	8.29e-97	1.84241	0.319	0.101	2.68e-92	0
Ethe1	2.11e-55	1.83603	0.291	0.128	6.82e-51	0
Plod3	2.29e-68	1.82595	0.289	0.109	7.38e-64	0
Fam129b	6.84e-152	1.82106	0.53	0.195	2.21e-147	0
Ecm1	1.92e-65	1.82047	0.268	0.096	6.2e-61	0
Ltb4r1	1.43e-204	1.80156	0.641	0.227	4.62e-200	0
Alox5ap	0	1.79255	0.914	0.357	0	0
Adgre1	4.38e-129	1.79118	0.377	0.109	1.41e-124	0
Hck	6.08e-159	1.79048	0.512	0.176	1.96e-154	0
Ifi47	1.65e-72	1.77654	0.394	0.187	5.34e-68	0
Slc7a8	2.05e-65	1.76727	0.279	0.103	6.61e-61	0
F13a1	1.49e-210	1.76148	0.601	0.183	4.83e-206	0
Pirb	4.19e-183	1.76125	0.601	0.22	1.35e-178	0
Plxnb2	3.34e-69	1.75957	0.302	0.115	1.08e-64	0
Rras	1.25e-41	1.75956	0.253	0.117	4.05e-37	0
Milr1	3.04e-84	1.75155	0.382	0.161	9.81e-80	0
Pira2	8.39e-126	1.74918	0.46	0.166	2.71e-121	0
Fcgr2b	2.74e-250	1.74701	0.755	0.261	8.84e-246	0
Igsf6	7.19e-196	1.74564	0.52	0.149	2.32e-191	0
Ifi203	1.4e-168	1.74362	0.758	0.435	4.52e-164	0
Ms4a6b	8.19e-166	1.74234	0.675	0.325	2.64e-161	0
Aldh3b1	1.07e-77	1.74103	0.276	0.09	3.44e-73	0
Csf1r	6.81e-194	1.72448	0.624	0.218	2.2e-189	0
Klra2	7.97e-242	1.72319	0.577	0.15	2.57e-237	0
Samhd1	2.38e-235	1.72316	0.867	0.476	7.68e-231	0
Rin2	8.26e-83	1.71765	0.363	0.142	2.67e-78	0
Gbp5	6.18e-54	1.71069	0.282	0.118	2e-49	0
Selenop	2.91e-77	1.70959	0.298	0.104	9.39e-73	0
Myd88	1.03e-81	1.70805	0.429	0.203	3.31e-77	0
Apobec1	3.88e-145	1.70788	0.55	0.213	1.25e-140	0
C3ar1	5.96e-98	1.70752	0.426	0.168	1.92e-93	0
Tmem106a	2.6e-84	1.70421	0.39	0.162	8.39e-80	0
Parp12	2.19e-68	1.70126	0.281	0.101	7.08e-64	0
C3	2.25e-218	1.69531	0.435	0.087	7.28e-214	0
Tnfrsf1a	9.97e-113	1.69045	0.421	0.154	3.22e-108	0
Prdx5	3.39e-299	1.68355	0.959	0.594	1.09e-294	0
Lrrc25	5.9e-103	1.68039	0.397	0.146	1.91e-98	0
Rassf4	2.2e-124	1.65163	0.498	0.198	7.09e-120	0
Ncf2	3.21e-256	1.65022	0.814	0.325	1.04e-251	0
Casp1	1.43e-86	1.64136	0.433	0.2	4.63e-82	0
Gpr141	4.99e-161	1.63301	0.572	0.215	1.61e-156	0
Blvrb	3.03e-96	1.62784	0.432	0.18	9.78e-92	0
AB124611	6.66e-88	1.61366	0.442	0.203	2.15e-83	0
Eps8	1.04e-254	1.61166	0.914	0.398	3.34e-250	0
Sdc4	5.06e-41	1.60542	0.322	0.168	1.63e-36	0
Irgm1	1.05e-54	1.60244	0.262	0.104	3.38e-50	0
Camk2d	1.97e-183	1.6017	0.723	0.332	6.35e-179	0
Atp13a2	2.4e-51	1.5965	0.297	0.134	7.74e-47	0
Clec12a	2e-107	1.59399	0.486	0.204	6.44e-103	0
2025-03-01	3.74e-133	1.59345	0.526	0.203	1.21e-128	0
Pilra	4.79e-169	1.59018	0.606	0.223	1.55e-164	0
Apba1	5.31e-61	1.5839	0.305	0.124	1.71e-56	0
Gm34084	9.92e-85	1.5834	0.367	0.141	3.2e-80	0
Ctss	4.69e-305	1.57991	0.977	0.537	1.51e-300	0
Maf	4.51e-131	1.57833	0.519	0.194	1.46e-126	0
App	8.5e-276	1.57811	0.934	0.414	2.74e-271	0
Cd180	4.69e-71	1.57138	0.349	0.144	1.51e-66	0
Pld4	1.1e-190	1.56334	0.67	0.259	3.55e-186	0
Zfp703	3.24e-79	1.55866	0.392	0.168	1.05e-74	0
Dennd1a	1.43e-161	1.55843	0.783	0.451	4.61e-157	0
Bst1	4.09e-87	1.55369	0.324	0.11	1.32e-82	0
Snx24	1.88e-126	1.55342	0.496	0.183	6.07e-122	0
Tgm2	4e-86	1.54338	0.338	0.118	1.29e-81	0
Zeb2os	1.01e-61	1.54288	0.266	0.097	3.25e-57	0
Lmo2	1.15e-65	1.54114	0.342	0.146	3.72e-61	0
Cndp2	2.4e-153	1.53924	0.67	0.331	7.74e-149	0
Ckap4	2.78e-57	1.53787	0.284	0.115	8.98e-53	0
Gda	2.69e-271	1.53665	0.89	0.363	8.68e-267	0
Stom	9.22e-62	1.53514	0.263	0.096	2.98e-57	0
Bach1	6.56e-125	1.53451	0.557	0.248	2.12e-120	0
Aif1	7.88e-97	1.53224	0.53	0.246	2.54e-92	0
Alpk1	1.63e-54	1.53143	0.262	0.102	5.26e-50	0
Il6ra	2.33e-134	1.52824	0.478	0.169	7.53e-130	0
Pid1	1e-190	1.5275	0.779	0.333	3.23e-186	0
Ifi206	1.16e-74	1.52674	0.323	0.122	3.74e-70	0
Sestd1	4.61e-71	1.5263	0.36	0.155	1.49e-66	0
Acvr2a	1.81e-65	1.51556	0.32	0.128	5.86e-61	0
Daxx	4.76e-45	1.51384	0.308	0.155	1.54e-40	0
Dock4	6.44e-120	1.51328	0.501	0.197	2.08e-115	0
Tbxas1	2.26e-102	1.50949	0.507	0.222	7.29e-98	0
Mpeg1	1.3e-229	1.50669	0.718	0.252	4.2e-225	0
Spi1	7.02e-251	1.50483	0.886	0.389	2.27e-246	0
Evi2a	1.81e-102	1.50249	0.513	0.245	5.85e-98	0
Ly86	4.15e-117	1.50131	0.58	0.268	1.34e-112	0
Rtp4	5.93e-142	1.50121	0.48	0.165	1.92e-137	0
Anxa5	2.1e-207	1.50027	0.84	0.459	6.79e-203	0
Lyn	5.68e-277	1.49848	0.962	0.551	1.83e-272	0
Oasl2	9.47e-154	1.49161	0.493	0.159	3.06e-149	0
Cd300a	2.85e-111	1.48118	0.452	0.172	9.19e-107	0
Gbp3	9.81e-37	1.47702	0.28	0.146	3.17e-32	0
D1Ertd622e	2.72e-43	1.47569	0.273	0.126	8.77e-39	0
Pde7b	5.43e-161	1.47017	0.552	0.19	1.75e-156	0
Kif13a	6.63e-72	1.46678	0.357	0.15	2.14e-67	0
1600014C10Rik	2.06e-50	1.46482	0.258	0.106	6.66e-46	0
Ifitm2	4.59e-274	1.45647	0.939	0.451	1.48e-269	0
Ifi30	1.09e-243	1.45586	0.938	0.493	3.51e-239	0
Sell	1.06e-127	1.45284	0.477	0.169	3.41e-123	0
Pnp	7.2e-165	1.45253	0.77	0.438	2.33e-160	0
Mcub	4.11e-149	1.45074	0.627	0.265	1.33e-144	0
Kdm7a	2.03e-135	1.4488	0.608	0.274	6.56e-131	0
Nfam1	7.39e-124	1.44855	0.5	0.193	2.39e-119	0
Tnfaip2	1.24e-157	1.44588	0.46	0.135	4.01e-153	0
Slfn1	8.25e-229	1.44439	0.719	0.256	2.67e-224	0
Rgl1	5.04e-108	1.44407	0.455	0.173	1.63e-103	0
Pilrb2	3.8e-47	1.44289	0.252	0.104	1.23e-42	0
Scimp	1.64e-53	1.44009	0.39	0.206	5.29e-49	0
Acer3	2.74e-137	1.43773	0.597	0.262	8.86e-133	0
Vim	3.47e-271	1.43658	0.987	0.747	1.12e-266	0
Trem2	2.16e-51	1.43632	0.259	0.102	6.96e-47	0
Adam15	1.93e-53	1.43621	0.306	0.135	6.22e-49	0
Dip2c	1.52e-66	1.42778	0.442	0.223	4.9e-62	0
Tpd52	6.49e-256	1.42514	0.901	0.412	2.1e-251	0
Slc29a3	8.41e-45	1.42271	0.286	0.134	2.71e-40	0
Il13ra1	3.36e-122	1.41952	0.427	0.142	1.08e-117	0
Cd86	1.29e-194	1.41544	0.84	0.397	4.16e-190	0
Emilin2	3.17e-249	1.41458	0.869	0.364	1.02e-244	0
Dusp3	3.17e-53	1.40859	0.349	0.172	1.02e-48	0
Rnf217	1.81e-52	1.4072	0.298	0.128	5.83e-48	0
Tnfrsf13b	2.28e-47	1.40695	0.298	0.139	7.35e-43	0
S100a4	8.54e-287	1.40168	0.991	0.657	2.76e-282	0
Plaur	2.31e-232	1.39416	0.786	0.296	7.46e-228	0
Msrb1	1.34e-217	1.39226	0.827	0.419	4.33e-213	0
Slc11a1	4.44e-58	1.39175	0.294	0.121	1.43e-53	0
Tiam1	2.19e-108	1.38931	0.542	0.253	7.09e-104	0
Ccl2	5.13e-182	1.38626	0.736	0.29	1.66e-177	0
Sirpb1b	7.49e-118	1.38379	0.385	0.118	2.42e-113	0
Oasl1	1.16e-64	1.38174	0.36	0.158	3.74e-60	0
Plekho1	2.09e-104	1.37912	0.542	0.251	6.75e-100	0
Slc8a1	3.98e-128	1.37548	0.604	0.262	1.28e-123	0
Rab7b	1.38e-87	1.37186	0.413	0.167	4.46e-83	0
Ctsa	2.71e-140	1.36844	0.669	0.328	8.74e-136	0
Fn1	1.05e-193	1.36815	0.644	0.21	3.39e-189	0
Fgr	2.22e-154	1.36798	0.636	0.274	7.18e-150	0
Ggh	2.81e-44	1.36503	0.352	0.196	9.08e-40	0
Lair1	2.14e-34	1.36424	0.272	0.14	6.92e-30	0
St7	2.05e-74	1.36034	0.511	0.284	6.61e-70	0
Cfp	9.91e-163	1.35802	0.676	0.275	3.2e-158	0
Rasgrp4	6.13e-56	1.35722	0.284	0.115	1.98e-51	0
Ifi207	2.58e-278	1.35227	0.908	0.371	8.32e-274	0
Snx2	1.83e-165	1.35021	0.756	0.387	5.9e-161	0
Il17ra	7.75e-84	1.34996	0.437	0.197	2.5e-79	0
Isg15	3.77e-183	1.34966	0.689	0.287	1.22e-178	0
Slfn8	1.79e-49	1.345	0.288	0.128	5.79e-45	0
Cib1	1.27e-60	1.34348	0.455	0.27	4.09e-56	0
Ralb	3.77e-88	1.34187	0.459	0.209	1.22e-83	0
Scamp1	8.86e-50	1.33969	0.281	0.121	2.86e-45	0
Atp8a1	1.45e-99	1.33743	0.588	0.317	4.67e-95	0
S100a6	4.55e-308	1.33584	0.997	0.805	1.47e-303	0
Lgals9	4.11e-95	1.3314	0.558	0.301	1.33e-90	0
Gbp8	8.5e-37	1.33049	0.334	0.19	2.75e-32	0
Glrx	2.45e-75	1.3264	0.539	0.319	7.92e-71	0
F10	7.45e-226	1.31956	0.72	0.242	2.41e-221	0
Xdh	1.18e-85	1.31783	0.493	0.247	3.82e-81	0
Npc2	6.66e-248	1.3148	0.97	0.669	2.15e-243	0
Morrbid	1.75e-130	1.31421	0.744	0.434	5.64e-126	0
Ly6e	5.3e-261	1.31139	0.983	0.671	1.71e-256	0
Fes	2.97e-88	1.30913	0.455	0.205	9.57e-84	0
Anxa1	1.51e-88	1.30715	0.615	0.349	4.88e-84	0
Grn	1.55e-201	1.30702	0.795	0.344	5.02e-197	0
Clec4a2	3.66e-79	1.30563	0.444	0.198	1.18e-74	0
Fcgr3	7.14e-185	1.30482	0.757	0.331	2.3e-180	0
S100a1	2.84e-31	1.30342	0.273	0.149	9.17e-27	0
Rbm47	9.83e-174	1.30271	0.728	0.316	3.18e-169	0
Fcer1g	8.93e-286	1.29495	0.993	0.695	2.88e-281	0
Mpp1	7.16e-81	1.29142	0.412	0.183	2.31e-76	0
Adssl1	1.87e-68	1.28917	0.395	0.186	6.03e-64	0
Tcf7l2	4.95e-62	1.28409	0.37	0.169	1.6e-57	0
Dna2	1.53e-31	1.28335	0.298	0.172	4.93e-27	0
Itga5	2.16e-35	1.2813	0.269	0.136	6.98e-31	0
Maml3	1.96e-120	1.28126	0.577	0.253	6.31e-116	0
Itgam	1.49e-213	1.27932	0.858	0.366	4.79e-209	0
Gpx1	1.13e-217	1.27641	0.958	0.602	3.64e-213	0
Arnt	2.1e-60	1.2749	0.454	0.257	6.77e-56	0
Tnfaip8l2	4.2e-45	1.27433	0.359	0.197	1.36e-40	0
Gngt2	4.66e-70	1.26677	0.414	0.193	1.5e-65	0
Psap	3.97e-261	1.26504	0.994	0.632	1.28e-256	0
Sdc3	1.48e-77	1.26465	0.49	0.241	4.77e-73	0
Dstn	1.6e-125	1.25732	0.675	0.365	5.16e-121	0
Aprt	1.54e-190	1.25548	0.908	0.553	4.97e-186	0
Phf11b	3.13e-42	1.25256	0.411	0.257	1.01e-37	0
Flot1	6.65e-51	1.24998	0.375	0.199	2.15e-46	0
Shtn1	6.28e-98	1.24934	0.525	0.24	2.03e-93	0
Csf2ra	1.83e-126	1.24856	0.635	0.298	5.92e-122	0
Sirpa	5.07e-180	1.24578	0.763	0.322	1.64e-175	0
Tor3a	2.4e-32	1.24268	0.287	0.159	7.73e-28	0
Taldo1	2.83e-175	1.24245	0.869	0.568	9.14e-171	0
Man2a1	4.28e-82	1.24151	0.54	0.303	1.38e-77	0
Stx7	7.13e-117	1.23985	0.658	0.353	2.3e-112	0
Irf5	3.16e-99	1.23958	0.579	0.296	1.02e-94	0
Emp1	9.77e-76	1.23585	0.558	0.315	3.15e-71	0
5031439G07Rik	8.54e-97	1.23568	0.51	0.233	2.76e-92	0
Slfn2	9.72e-218	1.23443	0.932	0.535	3.14e-213	0
Fgd4	5.09e-71	1.23308	0.303	0.11	1.64e-66	0
Ptpn1	1.64e-144	1.23243	0.812	0.525	5.3e-140	0
Pdxk	2.28e-32	1.23119	0.289	0.16	7.36e-28	0
Rab31	7.7e-101	1.22898	0.477	0.2	2.49e-96	0
Sap30	2.39e-34	1.22819	0.324	0.189	7.72e-30	0
Lgmn	3.27e-104	1.2278	0.529	0.229	1.06e-99	0
Camkk2	1.4e-28	1.22723	0.279	0.16	4.51e-24	0
Mndal	4.11e-100	1.22526	0.757	0.514	1.33e-95	0
Rasgrp2	1.98e-30	1.22072	0.254	0.133	6.39e-26	0
Unc93b1	1.51e-115	1.21915	0.6	0.285	4.86e-111	0
Eif4ebp1	1.28e-103	1.21829	0.606	0.315	4.13e-99	0
Arhgap17	6.92e-107	1.21581	0.689	0.418	2.23e-102	0
Fgl2	9.13e-43	1.21404	0.368	0.206	2.95e-38	0
Lamp2	4.22e-167	1.21259	0.8	0.43	1.36e-162	0
Pou2f2	2.03e-43	1.20999	0.266	0.118	6.56e-39	0
Gbp4	9.87e-27	1.20963	0.302	0.186	3.19e-22	0
Slc49a4	3.84e-94	1.20196	0.533	0.251	1.24e-89	0
Pygl	3.45e-74	1.19496	0.352	0.14	1.11e-69	0
Rab5c	4.57e-121	1.19484	0.721	0.438	1.48e-116	0
Daglb	3.23e-33	1.19469	0.29	0.157	1.04e-28	0
Ifngr2	2.19e-84	1.19351	0.457	0.206	7.07e-80	0
Cysltr1	8.02e-27	1.19329	0.258	0.141	2.59e-22	0
Srgap2	7.62e-80	1.19224	0.648	0.418	2.46e-75	0
Stat2	3.87e-58	1.19175	0.389	0.194	1.25e-53	0
Clec5a	5.63e-53	1.18236	0.265	0.105	1.82e-48	0
Ldlr	3.43e-82	1.18141	0.556	0.303	1.11e-77	0
Mitf	1.59e-72	1.17068	0.4	0.172	5.12e-68	0
Trafd1	8.15e-72	1.16762	0.501	0.278	2.63e-67	0
Pxk	2.88e-47	1.16482	0.376	0.207	9.31e-43	0
Rnase6	1.17e-60	1.16379	0.363	0.16	3.79e-56	0
Themis2	1.2e-55	1.152	0.29	0.119	3.88e-51	0
Cers6	1.74e-139	1.15082	0.862	0.556	5.61e-135	0
Gm46224	4.97e-67	1.14949	0.375	0.163	1.6e-62	0
Trim30a	1.37e-123	1.1466	0.677	0.362	4.41e-119	0
Lrpap1	1.06e-30	1.14496	0.383	0.262	3.42e-26	0
Osm	4.85e-66	1.14417	0.36	0.157	1.57e-61	0
Scpep1	5.75e-41	1.14411	0.389	0.232	1.86e-36	0
Itgb7	3.7e-70	1.14235	0.45	0.222	1.2e-65	0
Tspo	7.72e-191	1.1367	0.959	0.672	2.49e-186	0
Emb	4.16e-111	1.13464	0.672	0.374	1.34e-106	0
Ccr2	6.41e-118	1.13286	0.782	0.449	2.07e-113	0
Tyrobp	2.64e-247	1.1327	0.993	0.715	8.53e-243	0
Rrbp1	1.13e-167	1.13087	0.931	0.64	3.64e-163	0
Fam174a	7.09e-25	1.12843	0.289	0.18	2.29e-20	0
Rnh1	9.22e-144	1.12723	0.827	0.526	2.98e-139	0
Bst2	8.82e-127	1.12381	0.781	0.494	2.85e-122	0
Rnpep	1.45e-47	1.12243	0.462	0.301	4.69e-43	0
Tmem104	1.25e-30	1.12209	0.258	0.135	4.03e-26	0
Metrnl	4.22e-118	1.12145	0.647	0.323	1.36e-113	0
Trim30d	9.98e-70	1.12042	0.373	0.16	3.22e-65	0
Prkcd	3.49e-102	1.11526	0.616	0.321	1.13e-97	0
Lamp1	1.62e-183	1.11141	0.89	0.498	5.21e-179	0
Naaa	7.82e-113	1.11088	0.6	0.268	2.52e-108	0
Sidt2	1.18e-50	1.11034	0.423	0.249	3.82e-46	0
Slc16a3	4.09e-55	1.10932	0.487	0.293	1.32e-50	0
Fam102b	7.77e-30	1.1079	0.294	0.165	2.51e-25	0
Lgals3	3.89e-228	1.10604	0.989	0.663	1.26e-223	0
Atp6v1b2	6.7e-125	1.10575	0.67	0.351	2.16e-120	0
Asah1	1.4e-54	1.1045	0.466	0.276	4.53e-50	0
Gbp7	1.37e-45	1.10287	0.444	0.282	4.42e-41	0
Lgals8	6.85e-41	1.10239	0.311	0.16	2.21e-36	0
Ifih1	5.57e-42	1.10172	0.347	0.189	1.8e-37	0
Cd68	2.06e-165	1.09901	0.747	0.331	6.65e-161	0
Snx10	3.98e-68	1.0975	0.476	0.259	1.28e-63	0
Capn2	1.1e-40	1.097	0.424	0.271	3.56e-36	0
Mospd2	3.82e-30	1.09623	0.301	0.174	1.23e-25	0
Napsa	7.98e-142	1.09526	0.75	0.403	2.58e-137	0
Rsu1	3.08e-45	1.0894	0.455	0.291	9.95e-41	0
Syk	1.94e-129	1.08705	0.761	0.409	6.25e-125	0
Nampt	2.24e-103	1.08516	0.67	0.387	7.24e-99	0
Acaa1a	5.07e-42	1.08248	0.463	0.312	1.64e-37	0
Lmna	1.01e-74	1.07833	0.619	0.378	3.25e-70	0
Cdc42se2	2.82e-72	1.07506	0.654	0.44	9.11e-68	0
Myadm	8.66e-36	1.07318	0.29	0.151	2.8e-31	0
Klf3	2.4e-42	1.07176	0.291	0.137	7.74e-38	0
Capg	5.53e-173	1.07168	0.938	0.581	1.78e-168	0
Ccdc115	8.07e-24	1.07076	0.323	0.218	2.61e-19	0
Mfsd1	1.32e-50	1.06654	0.394	0.216	4.26e-46	0
Rasgef1b	2.54e-82	1.06644	0.576	0.304	8.19e-78	0
Mcemp1	3.98e-68	1.06555	0.323	0.123	1.28e-63	0
Znhit1	2.72e-69	1.0651	0.563	0.358	8.78e-65	0
Trappc2l	6.97e-45	1.06289	0.491	0.337	2.25e-40	0
Wdfy3	1.37e-73	1.06217	0.419	0.189	4.42e-69	0
Abl2	5.94e-65	1.06084	0.543	0.325	1.92e-60	0
Diaph2	1.34e-138	1.06006	0.827	0.499	4.33e-134	0
Ctsh	1.44e-133	1.05948	0.758	0.365	4.66e-129	0
Parp14	9.26e-60	1.0587	0.484	0.284	2.99e-55	0
Dock1	9.86e-46	1.05842	0.336	0.166	3.18e-41	0
Atp6v0a1	7.16e-66	1.05819	0.446	0.221	2.31e-61	0
Sh3pxd2b	4.23e-26	1.05774	0.285	0.167	1.37e-21	0
Tbc1d9	7.25e-72	1.05656	0.459	0.218	2.34e-67	0
Pla2g7	3.66e-93	1.05299	0.386	0.136	1.18e-88	0
Rara	1.81e-72	1.0529	0.556	0.333	5.83e-68	0
Ogfr	2.24e-25	1.05228	0.344	0.235	7.23e-21	0
Sgk3	5.47e-48	1.05185	0.348	0.175	1.77e-43	0
Capza2	4.74e-140	1.05174	0.877	0.601	1.53e-135	0
Cdk2ap2	6.66e-63	1.0504	0.612	0.419	2.15e-58	0
Lgals3bp	1.22e-42	1.04861	0.451	0.292	3.93e-38	0
Ptpn6	1.1e-102	1.04778	0.712	0.443	3.56e-98	0
Cd2ap	4.35e-52	1.0456	0.461	0.269	1.41e-47	0
Cebpb	1.54e-219	1.04451	0.902	0.431	4.98e-215	0
Acaa2	2.05e-13	1.04355	0.275	0.207	6.62e-09	0
Xaf1	4.47e-68	1.04205	0.409	0.194	1.44e-63	0
Rap2c	6.6e-32	1.04118	0.349	0.22	2.13e-27	0
Cd300c2	4.79e-48	1.0392	0.37	0.187	1.55e-43	0
Ccr5	7.31e-70	1.03904	0.643	0.422	2.36e-65	0
Esd	2.61e-112	1.03639	0.777	0.514	8.42e-108	0
Nfic	1.27e-18	1.03402	0.263	0.171	4.1e-14	0
Creg1	1.05e-60	1.03304	0.449	0.251	3.38e-56	0
Ppp1r21	1.72e-42	1.03287	0.391	0.229	5.54e-38	0
Sem1	8.13e-188	1.03271	0.965	0.691	2.63e-183	0
Eif2ak2	4.83e-25	1.02889	0.333	0.221	1.56e-20	0
Vsir	2.74e-79	1.02833	0.521	0.273	8.84e-75	0
Itm2b	9e-154	1.02828	0.925	0.665	2.9e-149	0
Wdfy2	9.06e-46	1.02377	0.359	0.189	2.93e-41	0
Rnf213	1.84e-103	1.02335	0.635	0.352	5.94e-99	0
Zfp710	5.19e-52	1.0218	0.386	0.198	1.68e-47	0
Tep1	2.57e-38	1.0206	0.372	0.216	8.28e-34	0
Atp2c1	3.28e-30	1.01506	0.352	0.226	1.06e-25	0
Tmem219	3.54e-18	1.01469	0.308	0.218	1.14e-13	0
Skap2	6.52e-148	1.01439	0.813	0.44	2.1e-143	0
Acly	2.78e-51	1.00862	0.531	0.367	8.96e-47	0
Fry	5.12e-28	1.00856	0.282	0.161	1.65e-23	0
Sdcbp	1.18e-158	1.00823	0.894	0.564	3.81e-154	0
Emp3	7.02e-144	1.00549	0.914	0.594	2.27e-139	0
Acox3	7.8e-26	1.00469	0.275	0.158	2.52e-21	0
Prkx	1.3e-31	1.00456	0.353	0.22	4.2e-27	0
Ppard	3.73e-32	1.00167	0.316	0.181	1.2e-27	0
Itprid2	1.49e-51	1.00063	0.433	0.242	4.81e-47	0
Lamtor4	2.72e-85	0.99587	0.755	0.499	8.77e-81	0
Hexa	2.74e-82	0.995745	0.553	0.288	8.86e-78	0
Gng12	1.91e-77	0.990352	0.498	0.25	6.18e-73	0
Dbi	2.16e-147	0.990044	0.938	0.611	6.97e-143	0
Zeb2	3.09e-201	0.987389	0.985	0.627	9.98e-197	0
Pkig	9.21e-20	0.986718	0.308	0.213	2.97e-15	0
2610001J05Rik	1.08e-18	0.984374	0.339	0.249	3.49e-14	0
Sh3bgrl	3.88e-109	0.98103	0.791	0.509	1.25e-104	0
Xpr1	7.22e-56	0.979961	0.55	0.358	2.33e-51	0
Ap1s2	2.84e-19	0.977704	0.272	0.177	9.16e-15	0
Atrnl1	3.18e-112	0.977494	0.677	0.343	1.03e-107	0
Cdk14	5.25e-72	0.974918	0.593	0.349	1.7e-67	0
Abcg1	4.16e-42	0.974402	0.293	0.139	1.34e-37	0
Xbp1	2.2e-56	0.972621	0.501	0.308	7.1e-52	0
Ahr	4.91e-22	0.971165	0.267	0.158	1.59e-17	0
Ifi35	2.1e-44	0.969575	0.484	0.325	6.77e-40	0
Arl8a	3.58e-39	0.96954	0.376	0.222	1.16e-34	0
Plcg2	7.01e-76	0.966943	0.603	0.363	2.26e-71	0
Trappc1	9.86e-18	0.966686	0.35	0.27	3.18e-13	0
Ccl9	8.97e-123	0.956213	0.621	0.254	2.9e-118	0
Btk	6.65e-40	0.95619	0.309	0.155	2.15e-35	0
Olfm1	6.69e-59	0.955855	0.494	0.27	2.16e-54	0
Aig1	2.3e-16	0.955403	0.304	0.219	7.42e-12	0
Socs3	1.12e-57	0.955329	0.421	0.217	3.63e-53	0
Acap2	8.46e-97	0.955212	0.655	0.377	2.73e-92	0
Arhgap26	1.48e-94	0.9538	0.771	0.507	4.77e-90	0
Jarid2	1.67e-114	0.952844	0.866	0.583	5.39e-110	0
Serp1	6.34e-86	0.950715	0.711	0.47	2.05e-81	0
Pitpna	1.17e-137	0.947799	0.899	0.616	3.77e-133	0
Lats2	1.19e-24	0.947054	0.251	0.141	3.85e-20	0
Cyba	6.53e-203	0.946503	0.995	0.784	2.11e-198	0
Trps1	1.49e-101	0.946109	0.84	0.573	4.81e-97	0
Man2b1	3.71e-41	0.944449	0.473	0.313	1.2e-36	0
Ubtd1	5.27e-37	0.943845	0.263	0.124	1.7e-32	0
Dok2	3.43e-59	0.938658	0.615	0.412	1.11e-54	0
Atp2b1	6.27e-127	0.938389	0.897	0.618	2.02e-122	0
Vps13c	7.08e-33	0.936476	0.352	0.214	2.29e-28	0
Nsf	4.22e-69	0.936287	0.562	0.345	1.36e-64	0
Tor1aip1	7.7e-78	0.936031	0.658	0.44	2.49e-73	0
Slc16a10	8.15e-25	0.935872	0.291	0.177	2.63e-20	0
Clip1	4.64e-35	0.932268	0.42	0.279	1.5e-30	0
Stk40	1.07e-38	0.930733	0.41	0.257	3.45e-34	0
Gns	6.7e-107	0.928125	0.64	0.337	2.16e-102	0
Tor1a	7.05e-16	0.927217	0.277	0.196	2.28e-11	0
Evl	3.74e-49	0.927182	0.54	0.361	1.21e-44	0
Gas7	1.15e-55	0.927099	0.55	0.339	3.71e-51	0
Rbms1	6.61e-109	0.925536	0.844	0.565	2.13e-104	0
Dtx3l	3.93e-15	0.925472	0.259	0.178	1.27e-10	0
Gpr35	1.12e-44	0.922508	0.257	0.109	3.6e-40	0
Lpl	1.19e-64	0.922319	0.455	0.211	3.84e-60	0
Hpcal1	1.8e-55	0.919517	0.556	0.362	5.8e-51	0
Rgs19	1.22e-13	0.919288	0.29	0.219	3.93e-09	0
Fos	1.37e-91	0.917096	0.877	0.65	4.43e-87	0
Pycard	1.51e-98	0.915914	0.845	0.588	4.88e-94	0
Timm10b	2.4e-86	0.914408	0.752	0.504	7.76e-82	0
Pacsin2	2.39e-50	0.913355	0.53	0.354	7.71e-46	0
Pde8a	2.96e-38	0.908419	0.309	0.158	9.55e-34	0
Arpc1b	1.63e-147	0.908414	0.952	0.687	5.25e-143	0
Ctsz	1.17e-148	0.905493	0.925	0.548	3.77e-144	0
Atp6ap1	1.55e-30	0.90543	0.365	0.235	4.99e-26	0
Cept1	2.23e-14	0.903514	0.254	0.177	7.19e-10	0
Nrros	2.54e-74	0.90348	0.599	0.357	8.21e-70	0
Malt1	1.3e-74	0.902031	0.84	0.632	4.2e-70	0
Lpxn	1.22e-60	0.900628	0.632	0.422	3.94e-56	0
Chmp4b	4e-112	0.89814	0.833	0.59	1.29e-107	0
Ufsp2	2.52e-14	0.897702	0.292	0.219	8.14e-10	0
Rab5if	2.99e-57	0.895966	0.639	0.463	9.66e-53	0
Tom1	6.65e-28	0.895275	0.266	0.147	2.15e-23	0
Hnrnpll	2.31e-37	0.892266	0.392	0.241	7.46e-33	0
Msmo1	2.06e-14	0.888059	0.283	0.205	6.66e-10	0
Lmo4	2.14e-21	0.883431	0.307	0.201	6.9e-17	0
Coro1c	1.22e-53	0.882963	0.573	0.39	3.95e-49	0
Irf2bp2	3.05e-59	0.881188	0.547	0.337	9.84e-55	0
Hmox2	6.11e-40	0.880537	0.462	0.314	1.97e-35	0
Atp6v0b	9.11e-119	0.878202	0.826	0.531	2.94e-114	0
Aoah	4.9e-17	0.87776	0.362	0.263	1.58e-12	0
Heatr1	1.4e-19	0.87671	0.287	0.192	4.52e-15	0
Lrp12	4.55e-41	0.874255	0.354	0.187	1.47e-36	0
Rreb1	8.05e-60	0.874227	0.52	0.305	2.6e-55	0
Sys1	4.3e-47	0.873702	0.553	0.395	1.39e-42	0
Nmi	6.79e-24	0.873225	0.38	0.277	2.19e-19	0
Slc25a12	2.04e-12	0.872442	0.265	0.195	6.6e-08	0
Tbc1d23	7.38e-41	0.872439	0.422	0.26	2.38e-36	0
Atp7a	1.22e-51	0.872144	0.432	0.234	3.92e-47	0
Pgd	2.96e-52	0.871767	0.527	0.352	9.55e-48	0
Nfil3	1.47e-53	0.871071	0.477	0.282	4.74e-49	0
Ern1	2.27e-27	0.870635	0.514	0.389	7.33e-23	0
Dlst	7.14e-31	0.870179	0.432	0.306	2.31e-26	0
Reep3	9.85e-63	0.869744	0.571	0.358	3.18e-58	0
Ncoa1	1.81e-41	0.868939	0.505	0.346	5.86e-37	0
Carhsp1	1.65e-15	0.868805	0.315	0.236	5.34e-11	0
Rhog	7.38e-47	0.868753	0.527	0.362	2.38e-42	0
Tspan5	3.21e-27	0.868123	0.334	0.207	1.04e-22	0
Erp29	1.96e-100	0.867685	0.829	0.559	6.33e-96	0
Dab2	1.82e-88	0.867539	0.584	0.275	5.86e-84	0
Irf2	1.46e-77	0.866362	0.704	0.485	4.7e-73	0
Gmfg	4.49e-81	0.864928	0.751	0.507	1.45e-76	0
Atf3	2.33e-113	0.864254	0.894	0.566	7.54e-109	0
Lamtor3	2.97e-17	0.863861	0.321	0.236	9.57e-13	0
Ccdc86	3.08e-19	0.863795	0.324	0.231	9.96e-15	0
Ucp2	5.32e-109	0.862793	0.869	0.594	1.72e-104	0
Gnaq	3.32e-110	0.862637	0.795	0.484	1.07e-105	0
Vwa5a	3.09e-20	0.861995	0.261	0.16	9.98e-16	0
Thbs1	1.57e-83	0.861695	0.323	0.104	5.06e-79	0
H2-DMa	2.42e-118	0.859537	0.755	0.373	7.8e-114	0
Sp110	2.82e-27	0.8585	0.439	0.326	9.1e-23	0
Bcl10	1.91e-20	0.857499	0.352	0.255	6.18e-16	0
Wfdc17	4.06e-286	0.855337	0.924	0.371	1.31e-281	0
Scand1	1.52e-100	0.85388	0.848	0.601	4.92e-96	0
Clock	3.53e-16	0.852648	0.309	0.225	1.14e-11	0
Hmgcl	3.88e-21	0.848707	0.315	0.213	1.25e-16	0
Ciao2a	1.76e-38	0.848521	0.569	0.422	5.67e-34	0
AI413582	4.34e-27	0.848031	0.366	0.248	1.4e-22	0
Cd44	7.82e-128	0.843779	0.912	0.606	2.52e-123	0
Arhgdib	8.63e-116	0.842752	0.944	0.692	2.79e-111	0
Mdfic	1.11e-37	0.842207	0.458	0.299	3.58e-33	0
Usp12	4.51e-19	0.840579	0.282	0.184	1.46e-14	0
Sipa1l3	7.36e-25	0.840195	0.31	0.19	2.38e-20	0
Rnf130	2.9e-52	0.839446	0.5	0.301	9.38e-48	0
Mvp	5.06e-29	0.83927	0.405	0.277	1.63e-24	0
Bak1	2.06e-17	0.837999	0.386	0.307	6.64e-13	0
Faim	7.11e-13	0.837476	0.309	0.242	2.29e-08	0
Pgs1	3.76e-32	0.834641	0.39	0.256	1.21e-27	0
Tm2d2	1.47e-10	0.8342	0.266	0.207	4.76e-06	0
Klf13	8.76e-65	0.833926	0.612	0.401	2.83e-60	0
Nadk	5.88e-28	0.832113	0.388	0.269	1.9e-23	0
Tmem256	1.25e-57	0.831655	0.694	0.495	4.03e-53	0
Ap2a2	5.22e-33	0.830725	0.445	0.309	1.69e-28	0
Samd8	2.45e-21	0.830322	0.299	0.193	7.92e-17	0
Anks1	1.99e-35	0.827032	0.388	0.237	6.44e-31	0
Hipk2	2.47e-34	0.824317	0.428	0.274	7.98e-30	0
Prkag2	5.48e-23	0.822071	0.309	0.196	1.77e-18	0
St3gal1	3.76e-32	0.820511	0.39	0.243	1.21e-27	0
Sat1	2.25e-113	0.818469	0.821	0.526	7.25e-109	0
Furin	7.15e-75	0.81793	0.615	0.355	2.31e-70	0
Klf4	1.41e-42	0.816599	0.5	0.315	4.56e-38	0
Ube2f	9.97e-24	0.816368	0.392	0.284	3.22e-19	0
Rab24	8.93e-24	0.81626	0.384	0.276	2.88e-19	0
Glud1	6.04e-70	0.814778	0.751	0.544	1.95e-65	0
Eepd1	7.64e-37	0.813536	0.265	0.125	2.47e-32	0
Tent5a	3.35e-26	0.813085	0.343	0.219	1.08e-21	0
Atp1a1	7.79e-69	0.812475	0.664	0.453	2.51e-64	0
Aph1a	1.04e-13	0.812157	0.274	0.2	3.36e-09	0
Tmem192	1.4e-08	0.811381	0.283	0.237	0.000451568	0
Srsf9	9.47e-58	0.810738	0.665	0.463	3.06e-53	0
Stam2	5.05e-27	0.810214	0.414	0.294	1.63e-22	0
Sgms1	9.68e-60	0.807905	0.545	0.309	3.13e-55	0
Gch1	2.98e-49	0.807649	0.439	0.251	9.62e-45	0
Cnih4	7.82e-43	0.806003	0.513	0.357	2.52e-38	0
Tmem65	1.05e-13	0.805312	0.261	0.182	3.39e-09	0
Gusb	3.47e-19	0.803058	0.38	0.286	1.12e-14	0
Cyfip1	7.1e-53	0.802212	0.528	0.331	2.29e-48	0
Vapb	4.38e-18	0.800957	0.344	0.258	1.41e-13	0
Pak1	9.27e-15	0.799832	0.253	0.166	2.99e-10	0
Eid1	3.19e-21	0.797054	0.438	0.345	1.03e-16	0
Slc15a3	1.54e-128	0.79703	0.709	0.34	4.98e-124	0
Slc23a2	3.03e-48	0.795351	0.408	0.226	9.77e-44	0
Ppp1r9b	3.24e-21	0.792506	0.276	0.173	1.05e-16	0
Fam49b	5.37e-115	0.792487	0.956	0.72	1.73e-110	0
Scp2	6.29e-41	0.789415	0.57	0.423	2.03e-36	0
Rhov	1.05e-71	0.789145	0.262	0.082	3.4e-67	0
Tgfb1	1.98e-81	0.788946	0.75	0.512	6.38e-77	0
Tm6sf1	8.28e-34	0.787098	0.467	0.324	2.67e-29	0
Ctsb	1.23e-159	0.78666	0.923	0.559	3.97e-155	0
Crlf2	2.36e-21	0.786523	0.385	0.285	7.63e-17	0
Anxa4	4.13e-36	0.783763	0.414	0.256	1.33e-31	0
Hcls1	7.34e-66	0.783424	0.68	0.482	2.37e-61	0
Rap1gds1	1.12e-34	0.78247	0.544	0.407	3.61e-30	0
Ndufb1-ps	2.15e-93	0.780174	0.854	0.603	6.95e-89	0
Mycbp2	9.49e-75	0.779587	0.837	0.635	3.06e-70	0
Lilrb4a	8.88e-159	0.779467	0.926	0.539	2.87e-154	0
Atp6v0c	6.64e-163	0.776381	0.964	0.682	2.14e-158	0
Zcchc2	1.68e-20	0.776363	0.281	0.179	5.43e-16	0
Rap1a	1.06e-78	0.775597	0.809	0.583	3.44e-74	0
Trim25	2.45e-44	0.772406	0.409	0.235	7.9e-40	0
Pepd	2.16e-15	0.770139	0.308	0.225	6.96e-11	0
Tspan14	1.66e-20	0.767965	0.365	0.264	5.36e-16	0
Epn1	1.19e-22	0.767834	0.397	0.295	3.85e-18	0
Tnfrsf11a	5.09e-23	0.767443	0.277	0.16	1.64e-18	0
Eif2b2	4.57e-11	0.767198	0.316	0.26	1.48e-06	0
Eif1a	8.07e-39	0.765334	0.55	0.409	2.6e-34	0
Pomp	4.52e-84	0.765011	0.868	0.622	1.46e-79	0
Arpc5	3.39e-100	0.761001	0.923	0.671	1.09e-95	0
Prr13	5.83e-43	0.760657	0.577	0.426	1.88e-38	0
Svil	8.45e-49	0.759994	0.58	0.385	2.73e-44	0
Chmp2b	8.11e-11	0.758729	0.261	0.198	2.62e-06	0
Anxa2	9.39e-102	0.757902	0.958	0.715	3.03e-97	0
Atp13a3	5.83e-50	0.757838	0.631	0.448	1.88e-45	0
Bmpr2	1.51e-19	0.756493	0.259	0.16	4.89e-15	0
Flna	8.09e-70	0.756188	0.684	0.467	2.61e-65	0
Fis1	6.47e-54	0.754703	0.692	0.517	2.09e-49	0
Ripk1	8.76e-26	0.754647	0.411	0.299	2.83e-21	0
Gsn	1.48e-81	0.751386	0.603	0.311	4.79e-77	0
Cisd2	4.77e-23	0.748623	0.445	0.347	1.54e-18	0
Morc3	7.19e-31	0.748395	0.401	0.269	2.32e-26	0
Ugp2	4.78e-18	0.747615	0.342	0.253	1.54e-13	0
Gm2a	3.53e-126	0.747428	0.832	0.42	1.14e-121	0
Dnajb14	5.81e-27	0.746918	0.325	0.197	1.88e-22	0
Slc8b1	1.45e-35	0.745479	0.269	0.132	4.67e-31	0
Pi4k2a	2.08e-26	0.74482	0.426	0.305	6.7e-22	0
Rbfa	4.84e-07	0.744252	0.256	0.216	0.0156259	0
Vcl	8.15e-31	0.744225	0.389	0.245	2.63e-26	0
Slk	2.55e-36	0.74421	0.517	0.373	8.22e-32	0
Epb41l2	4.24e-56	0.74389	0.682	0.479	1.37e-51	0
Klhl2	3.1e-23	0.743649	0.304	0.192	1e-18	0
Mrpl52	8.71e-71	0.742548	0.837	0.595	2.81e-66	0
Ptprj	1.45e-63	0.741109	0.713	0.494	4.67e-59	0
Lamtor2	1.03e-54	0.741007	0.66	0.47	3.33e-50	0
Atp6v0d1	7.57e-65	0.739986	0.632	0.417	2.44e-60	0
H3f3a	6.59e-143	0.736869	0.982	0.81	2.13e-138	0
Fam89b	2.14e-07	0.736043	0.258	0.214	0.0068984	0
Fuca1	1.47e-34	0.733088	0.5	0.362	4.75e-30	0
Arhgap24	1.46e-56	0.732833	0.361	0.161	4.7e-52	0
Cuedc2	1.04e-10	0.732751	0.351	0.302	3.35e-06	0
Crip1	1.96e-105	0.731193	0.972	0.747	6.31e-101	0
Atp11b	7.1e-52	0.730473	0.649	0.474	2.29e-47	0
Zyx	2.56e-55	0.728299	0.685	0.5	8.27e-51	0
Cdc42se1	1.54e-26	0.727365	0.481	0.374	4.98e-22	0
Rab1a	6.69e-66	0.726976	0.655	0.444	2.16e-61	0
Rapgef2	1.19e-32	0.726926	0.534	0.392	3.85e-28	0
S100a11	3.69e-123	0.726726	0.975	0.776	1.19e-118	0
Sertad2	4.36e-22	0.726712	0.423	0.316	1.41e-17	0
Glmp	6.1e-08	0.726173	0.26	0.212	0.00197042	0
Upp1	1.84e-74	0.725483	0.473	0.227	5.93e-70	0
Nrp1	1.78e-14	0.723826	0.291	0.206	5.75e-10	0
Psmb10	1.02e-41	0.723089	0.646	0.489	3.31e-37	0
Capns1	1.1e-56	0.723037	0.682	0.496	3.54e-52	0
Il4ra	2.96e-37	0.722565	0.422	0.258	9.56e-33	0
Etv6	1.57e-101	0.722537	0.837	0.534	5.06e-97	0
Cmpk1	2.97e-47	0.722455	0.59	0.433	9.59e-43	0
Rufy3	7.96e-15	0.722441	0.26	0.175	2.57e-10	0
Snx17	1.3e-14	0.722305	0.352	0.28	4.19e-10	0
Parp9	1.22e-19	0.722158	0.289	0.19	3.94e-15	0
Gm26740	1.12e-45	0.719816	0.386	0.202	3.61e-41	0
Slc6a6	4.95e-63	0.716689	0.655	0.438	1.6e-58	0
Cry1	4.62e-24	0.714865	0.301	0.187	1.49e-19	0
Sod2	2.43e-31	0.712917	0.481	0.364	7.86e-27	0
Csf2rb	1.31e-64	0.712876	0.543	0.289	4.24e-60	0
Mkrn1	5.54e-51	0.712353	0.616	0.441	1.79e-46	0
Med8	5.05e-09	0.711878	0.317	0.271	0.000163132	0
Stx4a	7.78e-09	0.708406	0.261	0.207	0.000251206	0
Dynll1	8.5e-77	0.708317	0.888	0.642	2.74e-72	0
Pip5k1c	8.04e-13	0.708145	0.277	0.202	2.6e-08	0
Tns3	7.87e-86	0.708004	0.528	0.256	2.54e-81	0
9930111J21Rik2	2.96e-25	0.706743	0.262	0.149	9.57e-21	0
Ncf1	9.55e-32	0.705691	0.418	0.27	3.08e-27	0
Ifnar2	1.41e-53	0.705422	0.526	0.324	4.54e-49	0
Irf9	5.05e-16	0.704365	0.269	0.181	1.63e-11	0
Cotl1	1.6e-88	0.704294	0.908	0.654	5.16e-84	0
Laptm4a	9.08e-35	0.704285	0.495	0.356	2.93e-30	0
Arl1	3.43e-16	0.70214	0.393	0.32	1.11e-11	0
Gnai2	4.23e-96	0.701143	0.945	0.709	1.37e-91	0
Chmp2a	4.52e-62	0.70066	0.779	0.567	1.46e-57	0
Foxn3	7.23e-51	0.699781	0.697	0.5	2.33e-46	0
Pdlim5	8.83e-64	0.699004	0.605	0.377	2.85e-59	0
Dennd4c	3.16e-10	0.698219	0.292	0.228	1.02e-05	0
Casp8	4.02e-35	0.696546	0.499	0.363	1.3e-30	0
Sec24b	6.76e-20	0.696328	0.389	0.292	2.18e-15	0
Arf3	1.53e-15	0.696207	0.392	0.318	4.95e-11	0
Gga1	3.27e-10	0.69425	0.267	0.207	1.05e-05	0
Mrpl33	8.15e-61	0.69374	0.818	0.599	2.63e-56	0
Mtpn	1.83e-43	0.691383	0.598	0.441	5.91e-39	0
Hcfc1r1	1.72e-21	0.691009	0.406	0.302	5.57e-17	0
Zup1	1.55e-13	0.690845	0.318	0.242	5e-09	0
Cers2	1.12e-08	0.690277	0.268	0.218	0.000360042	0
Rnf38	4.06e-19	0.690211	0.33	0.229	1.31e-14	0
Ppt1	1.03e-53	0.68997	0.53	0.331	3.32e-49	0
Zfand2a	8.54e-19	0.689649	0.25	0.155	2.76e-14	0
Vapa	5.93e-69	0.688111	0.748	0.533	1.91e-64	0
Crtc3	2.68e-28	0.681905	0.44	0.312	8.64e-24	0
Pik3c2a	2.15e-35	0.680353	0.382	0.229	6.95e-31	0
Bin2	1.5e-25	0.680137	0.471	0.363	4.85e-21	0
1110008P14Rik	3.37e-08	0.679047	0.301	0.258	0.00108882	0
Prdx1	4.44e-73	0.677845	0.898	0.643	1.43e-68	0
Itgb2	1.73e-54	0.677009	0.664	0.477	5.58e-50	0
Ist1	3.36e-35	0.676201	0.455	0.309	1.09e-30	0
Gna13	7.28e-72	0.675773	0.762	0.521	2.35e-67	0
Max	1.09e-18	0.674802	0.387	0.298	3.53e-14	0
Lamtor5	4.28e-27	0.672842	0.535	0.426	1.38e-22	0
Atp1b3	8.06e-58	0.67161	0.721	0.529	2.6e-53	0
Phc2	8.81e-14	0.671489	0.307	0.23	2.84e-09	0
Vamp4	2.78e-17	0.668867	0.331	0.241	8.99e-13	0
Snx6	1.45e-24	0.668578	0.485	0.378	4.67e-20	0
Gpr137b	8.47e-28	0.667588	0.294	0.165	2.73e-23	0
Atg13	2.74e-08	0.66678	0.26	0.209	0.00088336	0
Arpc2	1.55e-97	0.664821	0.964	0.759	5e-93	0
Mbnl2	1.92e-101	0.664183	0.88	0.612	6.21e-97	0
Anxa7	3.49e-08	0.664141	0.28	0.232	0.00112743	0
Plekhf2	1.48e-13	0.662283	0.262	0.186	4.78e-09	0
Snx5	6.9e-47	0.662115	0.7	0.526	2.23e-42	0
Twf2	4.91e-14	0.662059	0.357	0.286	1.59e-09	0
Clcn4	2.25e-10	0.662047	0.272	0.208	7.26e-06	0
Anxa3	8.62e-57	0.660879	0.448	0.225	2.78e-52	0
Myo5a	6e-37	0.659434	0.519	0.365	1.94e-32	0
Ube2q2	8.82e-07	0.65924	0.277	0.236	0.0284693	0
Snx20	2.99e-62	0.656419	0.587	0.366	9.65e-58	0
Sptlc2	4.93e-25	0.655814	0.464	0.35	1.59e-20	0
Ndufs8	6.21e-25	0.654837	0.52	0.414	2.01e-20	0
Nptn	1.45e-65	0.654534	0.783	0.564	4.69e-61	0
Agps	5.46e-27	0.65401	0.501	0.385	1.76e-22	0
Psmd8	2.06e-56	0.653509	0.728	0.529	6.64e-52	0
Pik3cb	1.48e-15	0.650748	0.313	0.222	4.79e-11	0
Vps26a	1.43e-35	0.649199	0.451	0.296	4.6e-31	0
Ubl3	1.39e-46	0.648847	0.622	0.447	4.5e-42	0
Mapk3	8.88e-08	0.648286	0.253	0.205	0.00286623	0
Dhx38	1.51e-13	0.647505	0.263	0.188	4.86e-09	0
Ywhag	2.25e-35	0.647285	0.556	0.417	7.26e-31	0
Akr1a1	6.87e-54	0.644455	0.702	0.515	2.22e-49	0
Rnf149	1.6e-70	0.643018	0.558	0.305	5.15e-66	0
Rnasek	1.61e-41	0.642811	0.64	0.481	5.21e-37	0
Kras	8.22e-44	0.642363	0.578	0.416	2.65e-39	0
Mia2	1.67e-30	0.64073	0.541	0.413	5.38e-26	0
Tln1	8.47e-64	0.639621	0.841	0.631	2.73e-59	0
Ncf4	1.72e-52	0.639228	0.605	0.42	5.56e-48	0
Ehd4	5.65e-38	0.638996	0.57	0.419	1.82e-33	0
Atp6v1e1	4.41e-90	0.638642	0.75	0.493	1.42e-85	0
Nfu1	9.5e-07	0.637866	0.312	0.281	0.0306722	0
Fam49a	1.34e-23	0.636246	0.325	0.202	4.32e-19	0
Gripap1	2.15e-15	0.63575	0.331	0.248	6.93e-11	0
Susd6	3.01e-49	0.635688	0.628	0.44	9.71e-45	0
Tex2	2.45e-10	0.634359	0.31	0.247	7.89e-06	0
Ctsl	6.76e-118	0.629204	0.643	0.278	2.18e-113	0
Ninj1	9.04e-84	0.628664	0.553	0.274	2.92e-79	0
Mrpl30	5.84e-34	0.628447	0.605	0.466	1.89e-29	0
Gnb2	7.9e-51	0.628361	0.767	0.562	2.55e-46	0
Brk1	1.1e-52	0.628301	0.737	0.548	3.54e-48	0
Cask	7.35e-23	0.628126	0.3	0.183	2.37e-18	0
Eif1b	8.71e-22	0.627869	0.453	0.364	2.81e-17	0
Cope	8.5e-27	0.627464	0.558	0.452	2.74e-22	0
Gng5	3.36e-91	0.626947	0.936	0.701	1.09e-86	0
Med15	1.21e-16	0.625549	0.389	0.307	3.9e-12	0
Rap2b	1.61e-24	0.622004	0.36	0.236	5.2e-20	0
S100a10	1.96e-86	0.621418	0.964	0.694	6.34e-82	0
Cd52	9.61e-119	0.620963	0.996	0.842	3.1e-114	0
Soat1	1.96e-88	0.620747	0.609	0.33	6.33e-84	0
Serf2	5.62e-102	0.619882	0.981	0.792	1.82e-97	0
Snx1	3.39e-09	0.619502	0.298	0.245	0.000109578	0
Riok3	1.12e-36	0.619092	0.572	0.43	3.62e-32	0
Tmbim4	1.16e-34	0.61849	0.534	0.395	3.74e-30	0
Ddhd1	3.47e-12	0.617612	0.34	0.268	1.12e-07	0
Map2k4	3.52e-22	0.617577	0.406	0.301	1.14e-17	0
Otulinl	8.25e-11	0.617365	0.353	0.293	2.66e-06	0
Atp6v1h	7.05e-46	0.617204	0.511	0.325	2.28e-41	0
Tmem14c	1.31e-37	0.616857	0.636	0.474	4.23e-33	0
Zfand5	4.47e-77	0.615559	0.84	0.622	1.44e-72	0
Ndrg1	2.57e-20	0.615546	0.38	0.267	8.31e-16	0
Commd4	7.34e-10	0.613613	0.35	0.301	2.37e-05	0
Rnf24	1.07e-06	0.613241	0.252	0.209	0.0346451	0
C1d	2.92e-07	0.613198	0.343	0.315	0.0094319	0
Hk3	4.21e-71	0.612964	0.363	0.147	1.36e-66	0
Ero1lb	5.73e-13	0.612284	0.321	0.245	1.85e-08	0
Asap1	1.82e-62	0.612175	0.732	0.49	5.87e-58	0
Notch2	2.78e-43	0.611077	0.509	0.326	8.96e-39	0
Necap2	1.57e-26	0.610386	0.474	0.347	5.08e-22	0
Rab11a	6.83e-28	0.610315	0.506	0.393	2.21e-23	0
Mob3b	1e-14	0.60929	0.27	0.182	3.23e-10	0
Slc43a2	4.12e-38	0.609183	0.348	0.191	1.33e-33	0
Ehd1	6.77e-29	0.608929	0.493	0.363	2.19e-24	0
P2rx4	4.74e-20	0.60883	0.255	0.152	1.53e-15	0
Rab14	3.39e-38	0.608711	0.605	0.464	1.1e-33	0
Mrpl54	7.57e-38	0.608357	0.657	0.495	2.45e-33	0
Bbip1	3.21e-15	0.607795	0.376	0.299	1.04e-10	0
Rrp1b	3.89e-09	0.606087	0.302	0.25	0.00012553	0
Cd300lf	3.3e-112	0.605789	0.586	0.254	1.06e-107	0
Atp6v1g1	3.37e-78	0.605586	0.818	0.581	1.09e-73	0
2025-03-05	9.99e-11	0.604511	0.351	0.296	3.23e-06	0
Rac1	3.97e-68	0.603868	0.859	0.628	1.28e-63	0
Sbno2	9.51e-28	0.603791	0.374	0.238	3.07e-23	0
Mindy3	1.4e-15	0.603086	0.417	0.335	4.52e-11	0
Washc4	6.6e-17	0.602476	0.311	0.218	2.13e-12	0
Txndc9	5.17e-10	0.602269	0.369	0.324	1.67e-05	0
Noct	1.25e-34	0.600706	0.348	0.198	4.02e-30	0
Psma7	4.86e-57	0.600626	0.903	0.654	1.57e-52	0
S100a13	1.22e-50	0.600572	0.77	0.565	3.95e-46	0
Stxbp3	4.38e-15	0.599497	0.327	0.237	1.41e-10	0
Sh3glb1	3.06e-58	0.5988	0.787	0.588	9.87e-54	0
Arpc4	2.28e-58	0.598718	0.825	0.607	7.36e-54	0
Pold4	1.6e-15	0.597383	0.424	0.344	5.17e-11	0
Cox14	1.95e-17	0.597132	0.47	0.397	6.29e-13	0
Nceh1	3.31e-47	0.596974	0.405	0.22	1.07e-42	0
Rraga	2.74e-07	0.596912	0.286	0.241	0.00883583	0
Tmed10	3.13e-45	0.596262	0.693	0.521	1.01e-40	0
Ikbkb	1.29e-17	0.59384	0.401	0.31	4.16e-13	0
Coro1a	1.76e-76	0.591934	0.972	0.751	5.69e-72	0
Chmp5	4.81e-09	0.591849	0.346	0.301	0.000155245	0
Sp100	2.78e-47	0.591243	0.652	0.48	8.99e-43	0
Htt	2.11e-09	0.590614	0.345	0.296	6.82e-05	0
Vamp8	1.39e-54	0.590557	0.788	0.578	4.5e-50	0
Lcp2	6.98e-33	0.590419	0.509	0.369	2.25e-28	0
Gabarap	1.09e-94	0.58974	0.923	0.69	3.52e-90	0
Eloa	1.47e-08	0.588766	0.294	0.246	0.000473871	0
Cep170	3.66e-16	0.588674	0.338	0.248	1.18e-11	0
Dync1i2	1.84e-29	0.587489	0.565	0.442	5.94e-25	0
Mt1	1.83e-47	0.586757	0.801	0.546	5.91e-43	0
Hsbp1	6.04e-16	0.585296	0.436	0.366	1.95e-11	0
Atf6	1.86e-39	0.581712	0.636	0.473	6.01e-35	0
Rars	3.07e-24	0.580715	0.516	0.412	9.9e-20	0
Atp6v1d	1.78e-22	0.580462	0.439	0.337	5.76e-18	0
Fkbp2	5.07e-18	0.579977	0.48	0.395	1.64e-13	0
Tmem50a	4.9e-23	0.579822	0.525	0.426	1.58e-18	0
Arf5	1.23e-53	0.578508	0.846	0.625	3.98e-49	0
Galnt7	2.06e-08	0.578355	0.339	0.287	0.000663936	0
Surf4	1.67e-15	0.575972	0.388	0.313	5.38e-11	0
Commd1	1.81e-10	0.574503	0.387	0.34	5.86e-06	0
Sec61b	3.47e-54	0.574281	0.903	0.655	1.12e-49	0
Plekho2	4.76e-55	0.572514	0.577	0.371	1.54e-50	0
Qk	9.9e-47	0.572506	0.705	0.531	3.2e-42	0
Ftl1	5.45e-145	0.572266	0.986	0.837	1.76e-140	0
Pdhb	1.74e-09	0.5721	0.374	0.333	5.62e-05	0
Abcc4	7.05e-11	0.571999	0.266	0.199	2.27e-06	0
Tmsb10	2.39e-84	0.571179	0.991	0.812	7.72e-80	0
Tkt	5.99e-54	0.571091	0.806	0.576	1.94e-49	0
Sec61g	2.17e-60	0.57018	0.931	0.695	6.99e-56	0
Cd244a	1.36e-11	0.569919	0.306	0.237	4.4e-07	0
Tle3	5.02e-12	0.568244	0.296	0.224	1.62e-07	0
Med21	1.14e-07	0.568176	0.316	0.278	0.00369106	0
Ilrun	4.6e-34	0.567873	0.523	0.379	1.48e-29	0
Zswim6	1.6e-51	0.567862	0.744	0.538	5.16e-47	0
Ttc7	4.47e-21	0.567239	0.44	0.344	1.44e-16	0
Myo1f	6.88e-52	0.567067	0.646	0.457	2.22e-47	0
Trio	3.84e-32	0.56651	0.499	0.347	1.24e-27	0
Rnf13	2.92e-15	0.566317	0.326	0.24	9.43e-11	0
Mapk6	6.59e-45	0.566216	0.615	0.438	2.13e-40	0
Idnk	1.2e-07	0.565455	0.322	0.283	0.00387314	0
Ppp2ca	6.12e-47	0.565335	0.769	0.59	1.98e-42	0
Creb5	2.03e-40	0.564696	0.515	0.31	6.56e-36	0
H13	2.99e-29	0.563674	0.558	0.437	9.65e-25	0
Pcyt1a	8.36e-20	0.562258	0.425	0.32	2.7e-15	0
Lpp	7.88e-60	0.561825	0.799	0.583	2.54e-55	0
Ptpre	6.28e-57	0.561648	0.63	0.407	2.03e-52	0
Fabp5	2.23e-36	0.56138	0.727	0.569	7.19e-32	0
Wdr83os	6.1e-07	0.558351	0.366	0.34	0.0197024	0
Tmem208	4.29e-12	0.558247	0.385	0.327	1.39e-07	0
Hsd17b12	2.82e-21	0.557124	0.506	0.412	9.12e-17	0
Rexo2	1.87e-16	0.555466	0.481	0.397	6.03e-12	0
Gde1	5.44e-12	0.554003	0.292	0.226	1.76e-07	0
Picalm	2.12e-65	0.553781	0.866	0.659	6.85e-61	0
Rap1b	1.56e-68	0.552346	0.919	0.722	5.02e-64	0
Ddx58	1.44e-12	0.552323	0.259	0.184	4.64e-08	0
Cenpb	8.31e-11	0.552036	0.347	0.29	2.68e-06	0
Vrk1	1.49e-10	0.551602	0.31	0.243	4.81e-06	0
Iqgap1	6.81e-75	0.551155	0.956	0.756	2.2e-70	0
Ptpn18	1.38e-59	0.55108	0.897	0.631	4.47e-55	0
Sppl2a	1.64e-31	0.550971	0.545	0.412	5.31e-27	0
Ascc3	1.49e-43	0.550636	0.684	0.519	4.81e-39	0
Stk3	1.67e-08	0.550179	0.263	0.208	0.000539657	0
Abr	7.99e-46	0.54939	0.629	0.441	2.58e-41	0
Ufm1	2.16e-10	0.549043	0.414	0.366	6.99e-06	0
Adcy7	1.22e-11	0.548132	0.36	0.297	3.93e-07	0
Atxn7l3b	6.52e-11	0.546258	0.375	0.325	2.1e-06	0
Tmem243	4.54e-10	0.544586	0.29	0.231	1.47e-05	0
Dynlrb1	6.97e-26	0.54311	0.581	0.467	2.25e-21	0
Ric1	9.97e-16	0.540461	0.384	0.294	3.22e-11	0
Ppp1r12c	2.46e-13	0.539391	0.354	0.285	7.95e-09	0
Ppp2r5a	9.05e-37	0.539291	0.573	0.433	2.92e-32	0
Selenof	5.62e-16	0.539136	0.481	0.405	1.81e-11	0
Ndufa1	5.24e-38	0.537066	0.64	0.485	1.69e-33	0
Stat1	5.24e-21	0.536895	0.505	0.405	1.69e-16	0
Cops9	6.66e-35	0.536228	0.686	0.527	2.15e-30	0
Actr3	3.23e-65	0.534022	0.932	0.72	1.04e-60	0
Lrrc58	6.52e-11	0.532919	0.32	0.255	2.11e-06	0
Trerf1	3.22e-29	0.53193	0.55	0.393	1.04e-24	0
Fkbp1a	1.12e-32	0.530063	0.664	0.499	3.63e-28	0
Snapc5	9.61e-07	0.529607	0.336	0.303	0.0310105	0
Synj1	7.71e-23	0.528796	0.452	0.331	2.49e-18	0
Clta	7.45e-61	0.527879	0.922	0.683	2.41e-56	0
Ywhab	1.06e-36	0.52081	0.71	0.544	3.43e-32	0
Cox6b1	1.76e-48	0.520205	0.91	0.671	5.67e-44	0
Zfp36l2	5.24e-46	0.520139	0.688	0.51	1.69e-41	0
Ahnak	7.99e-62	0.519679	0.877	0.66	2.58e-57	0
Rassf3	7.04e-16	0.518975	0.366	0.268	2.27e-11	0
Ythdf3	9.71e-37	0.51875	0.633	0.476	3.13e-32	0
Aup1	8.85e-11	0.517348	0.388	0.337	2.86e-06	0
Ano6	5.25e-20	0.516763	0.345	0.24	1.7e-15	0
Pxn	5.35e-21	0.516302	0.406	0.3	1.73e-16	0
Gng10	5.22e-20	0.516173	0.498	0.393	1.69e-15	0
Atox1	3.87e-87	0.515846	0.944	0.682	1.25e-82	0
Ftl1-ps1	3.85e-39	0.515149	0.457	0.29	1.24e-34	0
Braf	4.12e-17	0.51358	0.464	0.376	1.33e-12	0
Trak1	3.68e-19	0.51133	0.389	0.293	1.19e-14	0
Nin	1.1e-13	0.51117	0.308	0.229	3.56e-09	0
Plekhm3	7.58e-48	0.510007	0.51	0.309	2.45e-43	0
Arf1	1.51e-42	0.509673	0.725	0.545	4.86e-38	0
Lamtor1	3.95e-21	0.509542	0.498	0.405	1.28e-16	0
Bri3	2.03e-67	0.508899	0.763	0.54	6.54e-63	0
Selenow	2.97e-35	0.508698	0.761	0.587	9.59e-31	0
Mcl1	3.01e-95	0.508621	0.916	0.693	9.71e-91	0
Eif3k	1.17e-42	0.507274	0.85	0.621	3.76e-38	0
Arl4c	2.68e-16	0.505473	0.371	0.275	8.66e-12	0
Atp6ap2	2e-39	0.505118	0.617	0.455	6.44e-35	0
Arpc1a	2.12e-12	0.504543	0.409	0.354	6.86e-08	0
Mrps18c	6.17e-14	0.50408	0.457	0.39	1.99e-09	0
Herc6	1.89e-13	0.503647	0.277	0.197	6.09e-09	0
Fermt3	5.3e-25	0.503211	0.616	0.496	1.71e-20	0
H2afy	1.32e-46	0.502998	0.829	0.618	4.25e-42	0
Fyb	9.36e-45	0.501249	0.743	0.543	3.02e-40	0
Bnip2	5.77e-14	0.501166	0.434	0.367	1.86e-09	0
Ssbp4	9.07e-09	0.500361	0.382	0.342	0.000292837	0
Mff	2.23e-07	0.499847	0.315	0.275	0.00718815	0
Rasa3	9.87e-28	0.497574	0.38	0.246	3.19e-23	0
Prdx2	1.01e-25	0.496935	0.658	0.518	3.27e-21	0
Uck2	1.04e-13	0.496894	0.461	0.388	3.37e-09	0
Myl6	7.83e-69	0.496227	0.981	0.774	2.53e-64	0
Slfn4	1.96e-126	0.494864	0.523	0.187	6.32e-122	0
Zfp706	2.91e-16	0.494599	0.486	0.412	9.39e-12	0
Aopep	5.21e-34	0.493657	0.65	0.464	1.68e-29	0
Mpc2	4.26e-14	0.493481	0.44	0.373	1.37e-09	0
Tpst2	5.6e-08	0.493442	0.306	0.262	0.00180801	0
Casp4	6.33e-33	0.49321	0.448	0.292	2.04e-28	0
Fam117b	4.59e-18	0.491815	0.47	0.371	1.48e-13	0
Gpsm3	4.62e-20	0.490942	0.514	0.422	1.49e-15	0
Spop	8.5e-31	0.490536	0.597	0.463	2.74e-26	0
Ccl6	7.21e-134	0.489526	0.867	0.407	2.33e-129	0
Smdt1	2.02e-47	0.489006	0.859	0.635	6.53e-43	0
Pdcd10	4.83e-22	0.488671	0.578	0.474	1.56e-17	0
Adgre5	1.89e-29	0.488607	0.624	0.492	6.1e-25	0
Med13l	4.21e-34	0.486507	0.562	0.405	1.36e-29	0
Eif4e	5.42e-27	0.486487	0.585	0.463	1.75e-22	0
Ube2a	7.93e-14	0.485518	0.405	0.343	2.56e-09	0
Msn	1.01e-58	0.485497	0.88	0.696	3.27e-54	0
Mrpl43	7.17e-08	0.481596	0.376	0.341	0.00231534	0
Piezo1	4.99e-14	0.481076	0.337	0.252	1.61e-09	0
Rtf2	2.1e-16	0.478906	0.447	0.369	6.78e-12	0
Cggbp1	1.11e-16	0.478482	0.47	0.396	3.6e-12	0
Zfand3	1.17e-56	0.478362	0.806	0.597	3.79e-52	0
Zfp36	3.95e-66	0.477583	0.805	0.559	1.27e-61	0
Scamp2	1.97e-12	0.477252	0.398	0.331	6.37e-08	0
BC005537	6.97e-53	0.47707	0.7	0.513	2.25e-48	0
Mxi1	3.37e-18	0.475552	0.411	0.301	1.09e-13	0
Cript	1.57e-15	0.474588	0.446	0.374	5.08e-11	0
Rpl36al	6.42e-50	0.473929	0.974	0.738	2.07e-45	0
Taok3	1.03e-25	0.473102	0.568	0.451	3.33e-21	0
H2-DMb1	3.71e-22	0.472341	0.414	0.265	1.2e-17	0
Ndufb4	1.85e-16	0.472125	0.528	0.447	5.97e-12	0
Usp8	1.48e-06	0.47054	0.268	0.227	0.0478994	0
Fcho2	4.82e-28	0.470359	0.535	0.405	1.56e-23	0
Ndel1	1.66e-32	0.469908	0.548	0.407	5.34e-28	0
Mcts1	7.5e-08	0.468734	0.388	0.354	0.002421	0
Psen1	1.72e-13	0.468672	0.381	0.31	5.56e-09	0
Spg21	3.06e-12	0.46866	0.365	0.302	9.88e-08	0
Anapc13	4.26e-07	0.468656	0.394	0.368	0.0137572	0
Rtn4	1.53e-42	0.468599	0.743	0.573	4.94e-38	0
Ehbp1l1	4.5e-11	0.468343	0.343	0.278	1.45e-06	0
Ogfrl1	5.72e-26	0.466926	0.339	0.204	1.85e-21	0
Selenot	7.3e-10	0.466514	0.369	0.32	2.36e-05	0
Slirp	1.71e-09	0.465635	0.422	0.378	5.52e-05	0
Ndufs4	1.87e-25	0.46419	0.602	0.475	6.03e-21	0
Hdac9	4.31e-10	0.463751	0.331	0.25	1.39e-05	0
Ypel5	3.31e-14	0.461917	0.3	0.216	1.07e-09	0
Rgs2	1.79e-30	0.461777	0.684	0.526	5.78e-26	0
Fndc3b	1.71e-58	0.46127	0.607	0.375	5.52e-54	0
Cox4i1	4.31e-48	0.461112	0.963	0.748	1.39e-43	0
Tcf25	1.58e-29	0.459217	0.658	0.525	5.11e-25	0
Ndufa11	1.21e-23	0.458932	0.677	0.528	3.89e-19	0
Tram1	1.68e-12	0.45889	0.428	0.368	5.41e-08	0
Cstb	3.82e-146	0.458611	0.9	0.559	1.23e-141	0
Gsr	4.19e-116	0.458355	0.66	0.355	1.35e-111	0
Lrrc59	3.05e-08	0.458209	0.378	0.338	0.00098398	0
Ndufa3	5.47e-30	0.457928	0.678	0.535	1.77e-25	0
Gab2	3.55e-88	0.45723	0.735	0.412	1.15e-83	0
Cox6a1	8.01e-31	0.456474	0.755	0.569	2.59e-26	0
Aff1	1.02e-51	0.456093	0.731	0.527	3.3e-47	0
Antxr2	5.54e-20	0.455781	0.427	0.309	1.79e-15	0
Dazap2	9.58e-31	0.453723	0.641	0.508	3.09e-26	0
Cdk9	3.11e-07	0.453364	0.318	0.283	0.0100251	0
Usp25	1.13e-19	0.451919	0.503	0.406	3.66e-15	0
Ccr1	2.32e-111	0.449077	0.583	0.247	7.49e-107	0
Nme2	1.94e-40	0.447698	0.964	0.692	6.26e-36	0
Lcorl	8.95e-12	0.447031	0.366	0.295	2.89e-07	0
Inpp5d	2.96e-34	0.446947	0.642	0.486	9.57e-30	0
Plin2	8.6e-107	0.446773	0.723	0.389	2.78e-102	0
Ndufa8	2.48e-09	0.446108	0.437	0.386	8.01e-05	0
Tmem164	1.93e-18	0.442405	0.446	0.35	6.22e-14	0
Actr2	4.34e-45	0.442039	0.788	0.6	1.4e-40	0
Cd14	3.4e-62	0.441524	0.417	0.192	1.1e-57	0
Ssr4	3.24e-31	0.440591	0.769	0.572	1.05e-26	0
Mrps21	1.11e-19	0.440494	0.595	0.48	3.58e-15	0
Adam17	9.63e-14	0.4399	0.4	0.327	3.11e-09	0
0610012G03Rik	7.7e-11	0.439708	0.447	0.393	2.49e-06	0
Elmsan1	3.6e-12	0.43847	0.408	0.331	1.16e-07	0
Pak1ip1	4.43e-07	0.438023	0.36	0.326	0.0142929	0
Spag9	1.66e-41	0.437248	0.888	0.712	5.35e-37	0
Ube2q1	7.07e-08	0.437238	0.322	0.278	0.00228165	0
Midn	1.27e-08	0.43679	0.289	0.234	0.000411381	0
Srp9	2.05e-23	0.436007	0.642	0.508	6.61e-19	0
Foxp1	2.45e-37	0.435544	0.763	0.597	7.92e-33	0
Ift20	1.98e-07	0.434974	0.382	0.345	0.00638373	0
Dleu2	2e-27	0.434432	0.582	0.441	6.46e-23	0
Psma4	3.31e-24	0.434391	0.724	0.549	1.07e-19	0
Ppp3ca	1.01e-44	0.434141	0.737	0.556	3.28e-40	0
Cfl1	7.86e-50	0.433938	0.973	0.777	2.54e-45	0
Lrch1	3.51e-19	0.432824	0.521	0.422	1.13e-14	0
Chmp3	2.57e-09	0.432313	0.348	0.298	8.31e-05	0
Atp5l	1.43e-40	0.431688	0.95	0.719	4.61e-36	0
Dtnbp1	2.28e-17	0.431148	0.481	0.395	7.36e-13	0
Rb1	9.78e-10	0.428179	0.367	0.308	3.16e-05	0
Arpc3	5.52e-43	0.427972	0.907	0.698	1.78e-38	0
Mob1a	3.73e-10	0.427869	0.392	0.34	1.2e-05	0
Ndufb8	7.24e-28	0.42721	0.712	0.542	2.34e-23	0
Tle4	2.29e-27	0.427015	0.539	0.407	7.39e-23	0
Tapbp	2.55e-25	0.426653	0.599	0.487	8.24e-21	0
Cyth4	5.24e-30	0.426306	0.562	0.419	1.69e-25	0
Cd164	5.61e-17	0.425898	0.429	0.344	1.81e-12	0
Vta1	9.41e-07	0.424409	0.333	0.297	0.030392	0
Il10ra	1.09e-14	0.424123	0.434	0.353	3.51e-10	0
Map2k3	6.45e-14	0.423064	0.426	0.354	2.08e-09	0
Api5	5.14e-08	0.420748	0.378	0.339	0.00165988	0
D8Ertd738e	4.31e-33	0.420666	0.835	0.634	1.39e-28	0
Psmb5	1.31e-19	0.420478	0.637	0.507	4.24e-15	0
Atp5mpl	1.28e-32	0.420054	0.798	0.608	4.12e-28	0
Dusp1	5.58e-50	0.419591	0.818	0.634	1.8e-45	0
Btaf1	4.11e-16	0.419455	0.446	0.358	1.33e-11	0
Orai1	2.66e-14	0.419129	0.447	0.365	8.58e-10	0
Anxa11	9.76e-25	0.417075	0.447	0.328	3.15e-20	0
Pin4	7.31e-08	0.415511	0.404	0.369	0.00236053	0
Tmem258	6.52e-22	0.415402	0.697	0.543	2.1e-17	0
Uqcrq	2.03e-37	0.415313	0.883	0.655	6.56e-33	0
Laptm5	7.47e-51	0.414623	0.95	0.75	2.41e-46	0
Card19	2.28e-83	0.413514	0.628	0.351	7.37e-79	0
Chic2	2.76e-08	0.410834	0.379	0.343	0.000890212	0
Osbpl9	1.1e-25	0.410238	0.462	0.337	3.56e-21	0
Nipa2	7.35e-09	0.410194	0.381	0.334	0.000237198	0
Ubl5	9.18e-35	0.409647	0.893	0.66	2.96e-30	0
Ostc	8.02e-15	0.409511	0.542	0.448	2.59e-10	0
Sh2b2	4.32e-39	0.408667	0.285	0.133	1.39e-34	0
Havcr2	9.53e-12	0.408417	0.378	0.3	3.08e-07	0
Lsp1	7.52e-62	0.407974	0.918	0.694	2.43e-57	0
Lrrc8d	2.23e-32	0.40796	0.588	0.428	7.19e-28	0
Wdr26	1.61e-26	0.407056	0.586	0.464	5.18e-22	0
Sp140	4.95e-29	0.406775	0.456	0.319	1.6e-24	0
Kdm4c	3.15e-11	0.406382	0.366	0.298	1.02e-06	0
Rell1	2.44e-14	0.405372	0.29	0.202	7.88e-10	0
Mtmr3	4.17e-26	0.405083	0.5	0.376	1.34e-21	0
Atp5j	7.34e-31	0.404093	0.848	0.609	2.37e-26	0
Ndufa6	5.23e-36	0.403792	0.709	0.536	1.69e-31	0
Ost4	3.03e-17	0.403239	0.548	0.463	9.78e-13	0
Hif1a	2.58e-19	0.403134	0.593	0.496	8.33e-15	0
Ier3ip1	3e-15	0.402291	0.533	0.454	9.7e-11	0
Psme4	8.7e-13	0.401502	0.422	0.354	2.81e-08	0
Uqcrb	2.3e-27	0.400908	0.746	0.559	7.42e-23	0
Aurkaip1	9.07e-22	0.399571	0.613	0.482	2.93e-17	0
Ndufa4	1.57e-29	0.398681	0.836	0.598	5.06e-25	0
Nfe2l2	1.24e-55	0.398092	0.637	0.402	3.99e-51	0
Fam104a	5.66e-17	0.397656	0.505	0.421	1.83e-12	0
Pkn1	6.28e-08	0.397497	0.353	0.311	0.00202794	0
Pdia6	1.04e-15	0.397332	0.551	0.457	3.36e-11	0
Tmem59	2.76e-07	0.397225	0.346	0.308	0.00892262	0
Vav3	3.82e-35	0.397041	0.678	0.507	1.23e-30	0
Tmbim6	1.96e-33	0.396801	0.701	0.549	6.32e-29	0
Entpd1	1.78e-31	0.395876	0.432	0.284	5.74e-27	0
Ubxn4	6.82e-22	0.395203	0.563	0.461	2.2e-17	0
Galnt6	1.59e-09	0.394898	0.292	0.23	5.12e-05	0
Pgam1	3.62e-35	0.394041	0.841	0.635	1.17e-30	0
Dnajc13	2.18e-11	0.392113	0.344	0.275	7.04e-07	0
Tmem134	2.92e-08	0.39205	0.407	0.368	0.000943688	0
Atp6v1f	3.22e-33	0.391377	0.77	0.605	1.04e-28	0
Mpc1	1.92e-12	0.391067	0.498	0.434	6.2e-08	0
Apobr	8.43e-12	0.390969	0.259	0.186	2.72e-07	0
Lrp10	9.57e-09	0.390654	0.4	0.359	0.000308823	0
Tubb6	1.43e-15	0.389534	0.376	0.287	4.62e-11	0
Cox7b	1.44e-25	0.389263	0.832	0.621	4.63e-21	0
Cox6c	4.93e-33	0.388814	0.924	0.689	1.59e-28	0
Tmed5	4.77e-10	0.387062	0.459	0.408	1.54e-05	0
Dennd5a	2.75e-19	0.387006	0.461	0.35	8.87e-15	0
Ext1	6.38e-56	0.386626	0.686	0.437	2.06e-51	0
Tfeb	1.94e-11	0.386553	0.252	0.18	6.28e-07	0
Fosl2	1.99e-20	0.386478	0.335	0.223	6.43e-16	0
Ap1g1	4.18e-14	0.385824	0.388	0.312	1.35e-09	0
Trappc4	5.77e-09	0.384867	0.428	0.386	0.00018626	0
Mydgf	3.46e-09	0.384862	0.431	0.387	0.000111687	0
Irf1	3.75e-14	0.384714	0.513	0.444	1.21e-09	0
Azin1	5.51e-26	0.383731	0.626	0.512	1.78e-21	0
Zcrb1	5.75e-13	0.383301	0.51	0.447	1.85e-08	0
Clk4	1.04e-07	0.381801	0.341	0.294	0.00336237	0
Ifnar1	1.8e-09	0.381224	0.327	0.269	5.81e-05	0
Cdc42	6.08e-42	0.381056	0.961	0.786	1.96e-37	0
Cux1	1.24e-45	0.380507	0.664	0.484	4.02e-41	0
Prcp	1.58e-07	0.378187	0.296	0.241	0.00511003	0
Exoc5	1.28e-11	0.376617	0.433	0.374	4.13e-07	0
Ap2s1	1.39e-25	0.376308	0.67	0.534	4.48e-21	0
St3gal4	1.6e-08	0.375568	0.365	0.312	0.000515691	0
Fam111a	1.42e-17	0.374557	0.405	0.315	4.6e-13	0
Atg3	5.1e-18	0.373313	0.494	0.409	1.65e-13	0
Rhoa	6.85e-35	0.373213	0.862	0.676	2.21e-30	0
Txn2	1.54e-06	0.372873	0.416	0.385	0.0495813	0
Fxyd5	3.09e-64	0.372321	0.977	0.781	9.98e-60	0
Sgpl1	1.16e-39	0.371555	0.529	0.351	3.75e-35	0
Tpm4	3.41e-21	0.371366	0.684	0.563	1.1e-16	0
Id1	1.67e-58	0.37064	0.4	0.182	5.39e-54	0
Selenos	5.57e-12	0.370231	0.505	0.435	1.8e-07	0
Plbd1	2.29e-90	0.367056	0.707	0.35	7.4e-86	0
Mef2a	4.48e-30	0.366609	0.686	0.551	1.45e-25	0
Tomm6	1.08e-31	0.364935	0.735	0.559	3.49e-27	0
Selenok	5.87e-28	0.364468	0.691	0.555	1.9e-23	0
Brd7	2.93e-12	0.36369	0.402	0.336	9.45e-08	0
Atp5e	2.56e-29	0.363621	0.966	0.732	8.26e-25	0
Grb2	5.47e-34	0.36309	0.784	0.614	1.77e-29	0
Hmox1	2.6e-36	0.362262	0.36	0.192	8.39e-32	0
Psmb4	1.37e-19	0.361553	0.725	0.565	4.43e-15	0
Adam8	3.6e-08	0.361253	0.388	0.337	0.00116082	0
Runx1	2.66e-41	0.361159	0.836	0.658	8.58e-37	0
Mapre2	1.42e-21	0.359119	0.611	0.493	4.6e-17	0
Slc9a3r1	5.31e-07	0.358672	0.362	0.33	0.0171311	0
Map7d1	9.87e-12	0.356568	0.369	0.307	3.19e-07	0
Vps35	1.01e-07	0.356396	0.357	0.317	0.00325539	0
Lrrc4	1.18e-07	0.356124	0.306	0.255	0.0037975	0
Arhgap31	1.83e-13	0.354197	0.344	0.251	5.92e-09	0
Abracl	1.76e-23	0.353173	0.752	0.581	5.67e-19	0
Hk2	6.87e-40	0.352611	0.505	0.334	2.22e-35	0
Fam50a	6.16e-12	0.352445	0.346	0.28	1.99e-07	0
Map1lc3b	1.07e-37	0.352153	0.727	0.575	3.47e-33	0
Tap1	9.32e-15	0.351423	0.502	0.43	3.01e-10	0
Rhob	1.04e-30	0.351181	0.438	0.282	3.34e-26	0
Gsk3b	4.22e-16	0.350409	0.56	0.478	1.36e-11	0
Mtch1	2.99e-10	0.34985	0.467	0.415	9.67e-06	0
H3f3b	1.21e-71	0.349437	0.989	0.896	3.9e-67	0
Lat2	5.69e-09	0.347728	0.432	0.379	0.000183645	0
Zbtb7a	3.1e-07	0.347462	0.321	0.278	0.0100006	0
Clasp2	2.3e-08	0.34729	0.424	0.378	0.000741419	0
Cap1	9.13e-23	0.346682	0.533	0.429	2.95e-18	0
Edem1	5.47e-11	0.345764	0.41	0.355	1.76e-06	0
Efhd2	7.12e-39	0.345659	0.818	0.632	2.3e-34	0
Uqcr11	4.41e-24	0.344216	0.795	0.587	1.42e-19	0
Ssr3	1.74e-09	0.343724	0.435	0.388	5.63e-05	0
Ndufc1	7.41e-20	0.343564	0.667	0.529	2.39e-15	0
Jmjd1c	3.16e-32	0.341947	0.849	0.689	1.02e-27	0
Pik3cd	2.4e-12	0.341066	0.443	0.382	7.76e-08	0
Actb	2.28e-51	0.34053	1	0.964	7.37e-47	0
Dpm1	2.21e-17	0.340455	0.534	0.454	7.14e-13	0
Vps29	6.97e-09	0.339683	0.487	0.441	0.000225178	0
Tet2	1.69e-26	0.338297	0.51	0.383	5.44e-22	0
Ndufb2	4.94e-11	0.336964	0.512	0.437	1.59e-06	0
Clic1	4.79e-27	0.336852	0.913	0.688	1.55e-22	0
1810037I17Rik	5.13e-22	0.336628	0.665	0.517	1.65e-17	0
Nlrp3	2.31e-69	0.336623	0.502	0.247	7.44e-65	0
Prelid1	3.57e-23	0.335856	0.788	0.592	1.15e-18	0
Spcs2	3.19e-14	0.33517	0.632	0.513	1.03e-09	0
Lmbrd1	8.87e-15	0.334582	0.38	0.292	2.86e-10	0
Ankrd37	1.86e-10	0.334418	0.265	0.196	6.01e-06	0
Baz2b	6.58e-45	0.33386	0.711	0.505	2.13e-40	0
Tpt1	6.61e-51	0.332705	0.995	0.905	2.13e-46	0
Pet100	1.87e-08	0.330408	0.42	0.38	0.000604795	0
Tacc1	1.73e-14	0.329966	0.554	0.474	5.58e-10	0
Nedd8	7.54e-24	0.327702	0.807	0.626	2.44e-19	0
Cmip	9.12e-34	0.327405	0.9	0.726	2.95e-29	0
Fem1c	9.27e-21	0.326355	0.467	0.355	2.99e-16	0
Stx8	1.48e-15	0.326171	0.502	0.424	4.78e-11	0
Timm8b	4e-12	0.32599	0.475	0.413	1.29e-07	0
Ndufb10	3.31e-12	0.325841	0.588	0.489	1.07e-07	0
Osbpl8	1.3e-56	0.323825	0.824	0.619	4.2e-52	0
Dbnl	6.35e-15	0.323782	0.505	0.429	2.05e-10	0
Atp6v0e	5.11e-36	0.319516	0.797	0.612	1.65e-31	0
Snf8	1.23e-09	0.317676	0.46	0.415	3.96e-05	0
Dctn3	7.31e-08	0.317008	0.509	0.467	0.00235846	0
Foxn2	1.1e-08	0.315916	0.333	0.278	0.000354927	0
Frrs1	5.7e-22	0.315627	0.332	0.22	1.84e-17	0
Diaph1	8.49e-46	0.315611	0.838	0.66	2.74e-41	0
Pkm	1.32e-36	0.315574	0.954	0.76	4.26e-32	0
Tagln2	3.46e-24	0.314248	0.874	0.649	1.12e-19	0
Plec	1.57e-18	0.313681	0.447	0.35	5.05e-14	0
Hdlbp	3.21e-15	0.312615	0.524	0.446	1.04e-10	0
Coro2a	3.37e-15	0.312008	0.571	0.482	1.09e-10	0
Ndufa13	4.96e-22	0.311507	0.845	0.647	1.6e-17	0
Top1	1.7e-25	0.311382	0.786	0.635	5.48e-21	0
Nckap1l	3.75e-11	0.311063	0.453	0.396	1.21e-06	0
Gtf2h5	7.28e-14	0.309738	0.595	0.49	2.35e-09	0
Cox5b	2.18e-20	0.309658	0.877	0.647	7.04e-16	0
Lsm12	7.05e-11	0.309437	0.542	0.467	2.28e-06	0
Gng2	1.37e-19	0.308264	0.632	0.516	4.44e-15	0
Atp5k	1.24e-18	0.308034	0.732	0.57	3.99e-14	0
Clint1	5.36e-21	0.30676	0.597	0.49	1.73e-16	0
Iscu	8.25e-07	0.305907	0.32	0.276	0.0266345	0
Tiparp	2.14e-48	0.304777	0.681	0.475	6.9e-44	0
Rnf115	3.45e-12	0.304562	0.41	0.34	1.11e-07	0
Rab2a	2.72e-28	0.304151	0.81	0.634	8.77e-24	0
Tlk2	3.84e-07	0.304085	0.353	0.311	0.0123848	0
Arl8b	3.97e-13	0.303894	0.434	0.364	1.28e-08	0
Mapkapk2	3.61e-35	0.303168	0.678	0.535	1.16e-30	0
Cltc	4.55e-39	0.303146	0.734	0.557	1.47e-34	0
AI662270	1.07e-13	0.302495	0.59	0.494	3.44e-09	0
Ndufb3	5.43e-08	0.300636	0.494	0.444	0.0017542	0
Ndufs5	9.67e-14	0.300627	0.606	0.502	3.12e-09	0
Rragc	1.19e-08	0.299205	0.304	0.248	0.000384706	0
Ube2l3	9.58e-19	0.297564	0.732	0.584	3.09e-14	0
Mef2d	1.87e-10	0.297363	0.408	0.344	6.03e-06	0
Tomm22	6.58e-11	0.297339	0.548	0.466	2.12e-06	0
Tnks	6.88e-08	0.296346	0.381	0.335	0.00222032	0
Reep5	1.68e-18	0.295688	0.675	0.542	5.41e-14	0
Vdac2	2.7e-18	0.295669	0.678	0.543	8.71e-14	0
Lims1	1.89e-24	0.295182	0.646	0.523	6.12e-20	0
Map2k2	3.15e-09	0.293988	0.495	0.445	0.000101781	0
Myl12b	6.55e-25	0.293974	0.709	0.582	2.12e-20	0
Mctp1	3.48e-20	0.290705	0.326	0.204	1.12e-15	0
Psmb3	4.74e-17	0.289981	0.757	0.573	1.53e-12	0
Zfp608	2.25e-35	0.289898	0.421	0.248	7.25e-31	0
Mtss1	4.37e-16	0.287385	0.47	0.362	1.41e-11	0
Cbl	2.94e-09	0.286339	0.464	0.417	9.5e-05	0
Tmem160	1.11e-14	0.285826	0.635	0.529	3.59e-10	0
Cox8a	3.97e-21	0.283139	0.972	0.777	1.28e-16	0
Clec4n	1.63e-43	0.282791	0.523	0.293	5.26e-39	0
Psma5	2.4e-09	0.282598	0.5	0.437	7.76e-05	0
Ubash3b	1.4e-18	0.282374	0.616	0.502	4.53e-14	0
B2m	7.4e-36	0.280911	0.987	0.866	2.39e-31	0
Sh3bgrl3	4.25e-24	0.280609	0.973	0.789	1.37e-19	0
Tmem189	5.71e-48	0.279351	0.61	0.411	1.84e-43	0
Hnrnph2	3.18e-14	0.278893	0.43	0.354	1.03e-09	0
Litaf	8.01e-42	0.277945	0.78	0.612	2.59e-37	0
Ssu72	4.85e-18	0.277933	0.603	0.501	1.57e-13	0
Dnm2	1.69e-15	0.277512	0.523	0.452	5.44e-11	0
Tax1bp1	4.41e-28	0.276651	0.773	0.63	1.42e-23	0
Gdi2	8.74e-17	0.274999	0.681	0.563	2.82e-12	0
Tmem167	4.46e-14	0.273043	0.632	0.535	1.44e-09	0
Wdr1	1.22e-11	0.272274	0.535	0.466	3.92e-07	0
Sertad1	1.44e-15	0.271824	0.384	0.293	4.64e-11	0
Jpt1	2.66e-15	0.271364	0.714	0.569	8.59e-11	0
Szrd1	5.63e-08	0.271214	0.375	0.336	0.00181915	0
Tlr4	9.59e-31	0.270047	0.269	0.136	3.1e-26	0
Zfp91	9.87e-15	0.26912	0.606	0.514	3.19e-10	0
Tmod3	3.26e-08	0.268872	0.437	0.398	0.00105322	0
Ndufv3	3.76e-14	0.268051	0.701	0.566	1.21e-09	0
Tmem234	1.82e-09	0.264632	0.521	0.47	5.89e-05	0
Tcirg1	5.55e-16	0.263453	0.315	0.221	1.79e-11	0
Rab3gap2	1.39e-06	0.263419	0.319	0.276	0.0448842	0
Morf4l1	6.34e-20	0.263142	0.812	0.667	2.05e-15	0
Tbcb	9.28e-08	0.262176	0.494	0.443	0.00299529	0
Ube2d3	1.26e-25	0.260629	0.822	0.668	4.05e-21	0
Atp5f1	6.03e-18	0.260179	0.802	0.603	1.95e-13	0
Abi1	2.67e-19	0.260165	0.623	0.517	8.61e-15	0
Ppp1r2	1.1e-09	0.259324	0.405	0.356	3.57e-05	0
Cast	6.87e-15	0.257104	0.539	0.46	2.22e-10	0
Pcbp1	2.17e-15	0.2549	0.616	0.503	7e-11	0
Atp5g1	1.05e-17	0.254854	0.827	0.609	3.39e-13	0
Aff4	8.65e-12	0.254226	0.452	0.382	2.79e-07	0
Ppig	1.4e-11	0.253181	0.543	0.475	4.53e-07	0
Capzb	6.43e-19	0.251742	0.844	0.658	2.08e-14	0
Mrfap1	3.56e-08	0.25072	0.48	0.44	0.00115087	0
Rps7	2.45e-14	-0.258181	0.961	0.801	7.9e-10	0
Rps3	3.59e-13	-0.260427	0.974	0.816	1.16e-08	0
Pcgf5	3.53e-09	-0.260476	0.408	0.326	0.000113952	0
Ostf1	7.22e-12	-0.26513	0.782	0.661	2.33e-07	0
Rpl10a	1.07e-10	-0.266585	0.96	0.795	3.44e-06	0
Bcap29	8.23e-07	-0.267245	0.197	0.297	0.0265825	0
Rpl15	4.15e-12	-0.268917	0.971	0.785	1.34e-07	0
Cpeb4	1.58e-07	-0.271236	0.408	0.348	0.00510583	0
Rps20	5.84e-14	-0.272303	0.992	0.863	1.88e-09	0
Eef1a1	2.82e-29	-0.279027	0.996	0.909	9.11e-25	0
Rpl8	1.33e-16	-0.281941	0.989	0.851	4.29e-12	0
Sgms2	6.62e-52	-0.285201	0.379	0.169	2.14e-47	0
Mxd1	3.56e-16	-0.297106	0.419	0.302	1.15e-11	0
Ier3	1.39e-63	-0.298135	0.692	0.41	4.5e-59	0
Rpl7	1.54e-13	-0.301209	0.944	0.778	4.98e-09	0
Apex1	6.78e-07	-0.307866	0.164	0.252	0.0219023	0
Rps15	4.53e-14	-0.31426	0.957	0.791	1.46e-09	0
Lsm8	1.11e-08	-0.314633	0.156	0.257	0.000359043	0
Rpl31	7.82e-09	-0.324667	0.89	0.721	0.000252422	0
Rpl36	3.89e-28	-0.325944	0.995	0.853	1.26e-23	0
Rps15a	4.04e-17	-0.328257	0.978	0.849	1.3e-12	0
Rps3a1	1.12e-21	-0.329808	0.972	0.845	3.61e-17	0
Actl6a	1.92e-07	-0.334607	0.19	0.291	0.0061837	0
Rpl5	1.41e-12	-0.335188	0.922	0.742	4.54e-08	0
0610010K14Rik	1.66e-07	-0.336412	0.163	0.257	0.00534782	0
Mrpl40	1.22e-06	-0.340258	0.183	0.276	0.0393039	0
Smim11	5.78e-07	-0.347512	0.181	0.276	0.0186602	0
Drg1	1.24e-06	-0.349509	0.218	0.32	0.039875	0
Kctd12	5.67e-11	-0.349928	0.428	0.33	1.83e-06	0
Rtcb	1.03e-06	-0.359182	0.2	0.297	0.0333952	0
Rpl4	1.63e-11	-0.365504	0.873	0.734	5.25e-07	0
Mnat1	4.2e-07	-0.370474	0.162	0.252	0.0135464	0
Sdha	1.5e-07	-0.376642	0.196	0.303	0.00484472	0
Gnas	1.13e-06	-0.378231	0.758	0.704	0.036436	0
Ifrd1	2.74e-17	-0.378577	0.861	0.734	8.84e-13	0
C5ar1	4.68e-17	-0.378713	0.273	0.163	1.51e-12	0
Snrnp40	6.11e-07	-0.386833	0.212	0.313	0.0197395	0
Grina	1.23e-08	-0.389687	0.33	0.261	0.000397643	0
Acsl5	1.12e-06	-0.392276	0.184	0.276	0.0359999	0
Ubl4a	5.58e-09	-0.393846	0.194	0.306	0.000180157	0
Rpl14	2.97e-20	-0.395951	0.952	0.779	9.6e-16	0
Helz	6.1e-08	-0.397956	0.187	0.288	0.0019689	0
Lsm1	5.66e-10	-0.399233	0.146	0.254	1.83e-05	0
Pam16	4.11e-09	-0.40569	0.15	0.252	0.000132762	0
Jun	9.55e-09	-0.406039	0.854	0.745	0.00030835	0
Rps18	5.58e-20	-0.413507	0.978	0.8	1.8e-15	0
Rpl13a	1.34e-33	-0.414604	0.966	0.821	4.32e-29	0
Sf3a3	2.27e-08	-0.416426	0.184	0.289	0.000731761	0
Ppp3cb	1.69e-07	-0.422011	0.162	0.255	0.00545681	0
Rpl3	1.96e-24	-0.426843	0.954	0.804	6.32e-20	0
Srsf1	1.19e-07	-0.437214	0.213	0.319	0.00385188	0
Eef1b2	4.21e-15	-0.440823	0.884	0.732	1.36e-10	0
Gtf3a	8.52e-10	-0.443282	0.172	0.284	2.75e-05	0
Wdr18	1.65e-07	-0.452845	0.162	0.254	0.00533985	0
Nans	1.4e-09	-0.45434	0.225	0.343	4.52e-05	0
Uba2	1.21e-08	-0.456426	0.189	0.297	0.000391342	0
Rpsa	3.79e-41	-0.457725	0.996	0.888	1.22e-36	0
Riok1	3.69e-07	-0.46363	0.229	0.334	0.0118975	0
Erh	4.21e-11	-0.464625	0.153	0.268	1.36e-06	0
1110038B12Rik	8.41e-07	-0.465109	0.201	0.296	0.027157	0
Polr2m	1.22e-08	-0.465156	0.175	0.28	0.000393393	0
Hspa14	3.01e-07	-0.466398	0.239	0.345	0.00970326	0
Ppia	1.6e-18	-0.470104	0.945	0.781	5.15e-14	0
Polr2e	1.48e-06	-0.472034	0.296	0.401	0.0479416	0
Nudt21	1.21e-06	-0.472383	0.277	0.375	0.0391822	0
Clec4e	2.26e-72	-0.475599	0.473	0.208	7.29e-68	0
Lta4h	5.01e-09	-0.479598	0.175	0.279	0.000161881	0
Cdk2ap1	3.22e-07	-0.484211	0.206	0.303	0.0103858	0
Mrpl13	2.29e-10	-0.484717	0.193	0.312	7.4e-06	0
Lrch3	1.91e-08	-0.486034	0.202	0.311	0.000616434	0
Cst3	5.11e-116	-0.488634	0.985	0.683	1.65e-111	0
Isy1	8.6e-09	-0.497908	0.252	0.371	0.000277675	0
Cct3	3.96e-07	-0.499142	0.37	0.456	0.0127739	0
Prrc2a	2.95e-08	-0.508578	0.211	0.321	0.000952133	0
Ppdpf	3.76e-10	-0.513958	0.189	0.306	1.21e-05	0
Nudc	1.09e-06	-0.516486	0.378	0.46	0.0352902	0
Hdac1	4.79e-08	-0.516528	0.298	0.404	0.00154805	0
Eef2	2.95e-16	-0.516666	0.852	0.74	9.53e-12	0
Slc25a4	1.08e-08	-0.517612	0.383	0.473	0.000349731	0
Cstf3	3.96e-07	-0.520753	0.225	0.324	0.0127961	0
Prpf19	1.22e-09	-0.520918	0.152	0.257	3.93e-05	0
Gar1	1.19e-11	-0.521131	0.147	0.261	3.83e-07	0
Mlec	7.98e-07	-0.521248	0.252	0.356	0.0257584	0
Guk1	1.65e-12	-0.527812	0.14	0.258	5.32e-08	0
Snrpe	5.28e-09	-0.528797	0.719	0.632	0.000170505	0
Trp53	4.88e-11	-0.529972	0.184	0.305	1.58e-06	0
Uhrf2	1.2e-06	-0.533284	0.243	0.334	0.0387231	0
Ddx1	7.01e-14	-0.536368	0.131	0.255	2.26e-09	0
Chordc1	1.58e-10	-0.538976	0.151	0.26	5.1e-06	0
Smc5	9.53e-07	-0.539291	0.21	0.305	0.0307822	0
Srm	8.69e-11	-0.539588	0.148	0.254	2.8e-06	0
Mrps26	2.83e-10	-0.540842	0.216	0.335	9.15e-06	0
Pcmt1	1.95e-08	-0.541153	0.243	0.355	0.000629361	0
Rpl12	1.61e-38	-0.543289	0.937	0.792	5.18e-34	0
Blmh	3.11e-08	-0.546186	0.17	0.269	0.00100319	0
Srrt	5.82e-07	-0.548466	0.206	0.304	0.0188014	0
Rev3l	1.19e-06	-0.549094	0.244	0.341	0.0383326	0
Uri1	3.35e-08	-0.551187	0.19	0.293	0.00108121	0
Fnbp1	6.88e-07	-0.552342	0.669	0.667	0.0222149	0
Nono	1.19e-07	-0.555372	0.321	0.421	0.0038342	0
Cd74	1.17e-10	-0.556363	0.777	0.604	3.77e-06	0
Usp37	1.24e-06	-0.559643	0.204	0.295	0.0401654	0
Txnl4a	3.43e-08	-0.560224	0.227	0.337	0.00110623	0
Cxcl2	3.71e-51	-0.56073	0.743	0.465	1.2e-46	0
Banf1	9.45e-11	-0.561776	0.289	0.404	3.05e-06	0
Pole4	5.74e-12	-0.562451	0.172	0.297	1.85e-07	0
Gadd45gip1	6.2e-09	-0.565352	0.264	0.377	0.00020029	0
Ruvbl1	6.79e-10	-0.566404	0.162	0.269	2.19e-05	0
Eif1ad	7.69e-12	-0.566865	0.149	0.267	2.48e-07	0
Pebp1	2.14e-08	-0.569091	0.401	0.479	0.000690116	0
Tspan13	3.89e-10	-0.570397	0.174	0.281	1.26e-05	0
Cdk4	1.26e-08	-0.570986	0.239	0.341	0.000407921	0
Rfx3	2.03e-09	-0.572004	0.16	0.261	6.56e-05	0
Ddx18	1.87e-08	-0.576515	0.218	0.324	0.000603578	0
Eftud2	9.82e-12	-0.577735	0.138	0.252	3.17e-07	0
Knop1	2.11e-10	-0.578097	0.172	0.287	6.81e-06	0
Znrd2	3.63e-12	-0.579847	0.144	0.259	1.17e-07	0
Timm8a1	8.45e-09	-0.581042	0.18	0.28	0.000272707	0
Rsl1d1	9.07e-08	-0.582684	0.313	0.416	0.00292846	0
Plekha2	1.41e-08	-0.584219	0.23	0.344	0.000456506	0
Rnf138	9.57e-08	-0.587162	0.183	0.279	0.00308887	0
Lin54	9.13e-08	-0.588328	0.165	0.255	0.00294666	0
Rab3gap1	1.72e-07	-0.592472	0.162	0.252	0.00556519	0
Dazap1	2.89e-08	-0.592972	0.248	0.363	0.000932553	0
Snrpd2	9.15e-10	-0.593626	0.595	0.576	2.96e-05	0
Supt4a	4.3e-09	-0.598997	0.438	0.519	0.000138793	0
Hdgf	8.22e-10	-0.600903	0.308	0.424	2.65e-05	0
Nr2c2	6.2e-07	-0.600984	0.169	0.256	0.0200109	0
Glipr1	2.32e-08	-0.602465	0.346	0.447	0.000748304	0
Nsmce4a	5.63e-13	-0.602469	0.159	0.283	1.82e-08	0
Il1r2	5.05e-16	-0.602764	0.436	0.297	1.63e-11	0
Matr3	1.48e-08	-0.603187	0.189	0.296	0.00047939	0
Slamf7	8.51e-11	-0.603955	0.197	0.312	2.75e-06	0
Nup214	2.99e-09	-0.605241	0.175	0.282	9.66e-05	0
Ddx27	2.35e-12	-0.606188	0.179	0.305	7.59e-08	0
Neat1	6.51e-09	-0.608028	0.677	0.577	0.000210257	0
H2-K1	4.76e-36	-0.608233	0.933	0.848	1.54e-31	0
Tiprl	3.55e-10	-0.611255	0.198	0.317	1.15e-05	0
Atl3	1.28e-11	-0.612316	0.172	0.289	4.14e-07	0
Rfc1	2.19e-09	-0.613685	0.192	0.303	7.07e-05	0
Nop10	1.32e-09	-0.615947	0.36	0.451	4.28e-05	0
Rasa1	5.97e-09	-0.617322	0.194	0.302	0.000192674	0
Dock8	1.72e-07	-0.617991	0.58	0.617	0.00555621	0
Pvt1	9.97e-10	-0.61852	0.345	0.46	3.22e-05	0
Fundc2	3.98e-12	-0.618765	0.225	0.355	1.28e-07	0
B4galnt1	2.14e-07	-0.619145	0.314	0.41	0.00691841	0
Hspe1	4.09e-10	-0.619178	0.658	0.617	1.32e-05	0
Upf1	1.01e-09	-0.621084	0.153	0.258	3.25e-05	0
Mtrex	5e-09	-0.621373	0.234	0.349	0.000161585	0
Fdx2	5.62e-14	-0.621733	0.182	0.317	1.82e-09	0
Herpud1	1.31e-07	-0.624205	0.186	0.282	0.00423259	0
Ppp1cc	2.24e-09	-0.627167	0.301	0.41	7.23e-05	0
Ankrd44	2.05e-07	-0.627255	0.603	0.638	0.0066072	0
Lsm6	5.58e-10	-0.62992	0.362	0.451	1.8e-05	0
Ss18	1.33e-09	-0.635408	0.161	0.265	4.28e-05	0
Serbp1	8.89e-21	-0.636535	0.779	0.7	2.87e-16	0
Anp32b	4.83e-16	-0.637825	0.772	0.693	1.56e-11	0
Bhlhe40	2.95e-11	-0.638959	0.529	0.604	9.51e-07	0
Bcl2a1b	2.76e-11	-0.639512	0.336	0.465	8.9e-07	0
Ddx10	6.78e-09	-0.642386	0.244	0.353	0.000218966	0
Ldha	4.58e-22	-0.647299	0.802	0.736	1.48e-17	0
Tardbp	8.9e-08	-0.647934	0.246	0.355	0.00287197	0
Supt20	1.82e-10	-0.649376	0.173	0.286	5.88e-06	0
Kcnq1ot1	1.26e-11	-0.650568	0.144	0.253	4.08e-07	0
Casc3	6.38e-08	-0.655956	0.177	0.272	0.00206114	0
Smarca2	3.13e-07	-0.657437	0.18	0.27	0.0100963	0
Akap8	1.83e-11	-0.659538	0.158	0.274	5.91e-07	0
Eef1d	8.64e-15	-0.660669	0.621	0.61	2.79e-10	0
Ranbp1	4.17e-08	-0.663319	0.57	0.55	0.00134525	0
Prpf8	1.35e-09	-0.664888	0.166	0.272	4.36e-05	0
Snrnp200	4.97e-07	-0.668427	0.177	0.265	0.0160481	0
Elf1	7.23e-07	-0.669887	0.39	0.472	0.0233535	0
Snhg1	1.71e-10	-0.672515	0.328	0.438	5.53e-06	0
Slc1a5	2.56e-08	-0.673055	0.218	0.326	0.000827259	0
Ccnt1	6.6e-07	-0.676068	0.221	0.319	0.0213195	0
Zmiz2	5.44e-15	-0.676422	0.156	0.291	1.75e-10	0
Bptf	1.44e-06	-0.677855	0.324	0.427	0.0464556	0
Hnrnph1	1.75e-07	-0.678574	0.349	0.46	0.00564531	0
Rps6kb1	1.31e-08	-0.680263	0.19	0.293	0.000421395	0
Tnip1	3.6e-08	-0.682849	0.258	0.365	0.001163	0
Sqstm1	9.34e-07	-0.682863	0.498	0.57	0.0301612	0
Mdm4	1.14e-08	-0.690015	0.195	0.299	0.000369395	0
Kif2a	6.12e-12	-0.691017	0.19	0.316	1.98e-07	0
Pspc1	6.3e-10	-0.697336	0.19	0.303	2.03e-05	0
Vps13a	1.1e-09	-0.698807	0.239	0.355	3.55e-05	0
Ppp6r1	6.98e-10	-0.699767	0.176	0.287	2.25e-05	0
Anapc15	1.11e-17	-0.700807	0.137	0.282	3.57e-13	0
Parp1	7.8e-11	-0.702268	0.176	0.288	2.52e-06	0
Ppm1b	1.22e-13	-0.704352	0.168	0.297	3.94e-09	0
Nolc1	1.15e-07	-0.705744	0.252	0.353	0.00371208	0
Vbp1	1.71e-10	-0.706471	0.158	0.268	5.51e-06	0
Tuba4a	3.13e-10	-0.706652	0.178	0.289	1.01e-05	0
Bcl7c	6.47e-16	-0.706749	0.195	0.344	2.09e-11	0
Smc1a	5.25e-08	-0.708112	0.358	0.442	0.00169427	0
Arap2	1.29e-08	-0.709765	0.214	0.318	0.000416995	0
Stip1	2.59e-14	-0.712421	0.178	0.31	8.36e-10	0
Tuba1b	1.36e-09	-0.715801	0.616	0.585	4.38e-05	0
Aarsd1	1.98e-15	-0.717546	0.161	0.297	6.38e-11	0
Mob3a	4.32e-10	-0.721686	0.169	0.278	1.39e-05	0
Uap1	1.19e-06	-0.72241	0.191	0.277	0.0385471	0
Ddx39	3.23e-10	-0.722775	0.281	0.386	1.04e-05	0
Gas5	5.33e-18	-0.723308	0.602	0.642	1.72e-13	0
Ints6	3.44e-08	-0.725832	0.184	0.281	0.00111074	0
Tuba1a	1.15e-10	-0.726491	0.296	0.419	3.72e-06	0
Clasp1	2.29e-09	-0.726687	0.229	0.342	7.4e-05	0
Hbs1l	1.11e-10	-0.730635	0.195	0.312	3.6e-06	0
Dhx9	2.85e-07	-0.730861	0.323	0.418	0.00921703	0
Cep120	1.52e-10	-0.731597	0.171	0.28	4.92e-06	0
Anp32e	1.08e-12	-0.732947	0.321	0.434	3.48e-08	0
Nfkb2	2.79e-09	-0.73295	0.19	0.297	9.02e-05	0
Hsp90aa1	1.76e-26	-0.733708	0.829	0.759	5.69e-22	0
Lrrc8c	1.31e-09	-0.736951	0.393	0.495	4.23e-05	0
Snhg8	8.04e-07	-0.73856	0.213	0.307	0.025962	0
Ptpn7	3.51e-15	-0.739078	0.17	0.309	1.13e-10	0
Ptms	3.73e-08	-0.741729	0.421	0.506	0.00120342	0
4932438A13Rik	1.01e-07	-0.745947	0.321	0.423	0.00326507	0
Scaper	8.29e-11	-0.751989	0.164	0.272	2.68e-06	0
Cbx1	2.35e-13	-0.752615	0.194	0.325	7.58e-09	0
Ywhaq	6.01e-14	-0.75348	0.402	0.511	1.94e-09	0
Eif4b	1.42e-09	-0.754065	0.306	0.424	4.59e-05	0
Nedd9	3.53e-07	-0.757813	0.339	0.433	0.0113859	0
Nfatc3	5.83e-13	-0.758232	0.181	0.308	1.88e-08	0
Ptger4	5.54e-09	-0.76266	0.162	0.255	0.000178757	0
B3gnt2	7.62e-08	-0.762861	0.213	0.313	0.00246122	0
Ddb1	5.15e-18	-0.765591	0.148	0.295	1.66e-13	0
Npm3	1.73e-20	-0.766115	0.197	0.355	5.58e-16	0
G3bp1	1.19e-15	-0.766883	0.394	0.513	3.83e-11	0
Ppm1g	7.73e-14	-0.769919	0.237	0.369	2.49e-09	0
Ube2h	2.24e-07	-0.772182	0.3	0.403	0.00723216	0
Anxa6	1.08e-14	-0.772727	0.305	0.44	3.49e-10	0
Etv3	2.38e-08	-0.773171	0.211	0.305	0.000769803	0
Ivns1abp	4.47e-11	-0.773335	0.201	0.323	1.44e-06	0
Ptma	1.18e-49	-0.774687	0.985	0.882	3.82e-45	0
Chn2	8.58e-10	-0.775051	0.154	0.252	2.77e-05	0
Arpp19	6.77e-18	-0.775561	0.58	0.605	2.19e-13	0
Ubac2	5.05e-11	-0.775767	0.264	0.389	1.63e-06	0
Hpf1	1.27e-14	-0.778969	0.237	0.371	4.1e-10	0
Lbr	1.91e-12	-0.780953	0.194	0.322	6.18e-08	0
Pnn	8.86e-11	-0.783445	0.268	0.389	2.86e-06	0
Arhgef1	1.39e-08	-0.784274	0.248	0.36	0.000447394	0
Galnt1	4.06e-13	-0.784844	0.242	0.378	1.31e-08	0
Grk6	6.11e-10	-0.785975	0.171	0.28	1.97e-05	0
Gars	8.14e-13	-0.786088	0.219	0.349	2.63e-08	0
Gmds	5.14e-13	-0.787017	0.228	0.357	1.66e-08	0
Lsm2	3.33e-17	-0.789806	0.187	0.329	1.08e-12	0
Khsrp	3.68e-11	-0.789919	0.188	0.308	1.19e-06	0
Med14	1.13e-11	-0.795065	0.154	0.267	3.66e-07	0
Nop58	2.78e-12	-0.798583	0.342	0.449	8.98e-08	0
Mthfd2	7.61e-17	-0.801854	0.147	0.288	2.46e-12	0
Alyref	1.67e-13	-0.803059	0.3	0.421	5.38e-09	0
Taf15	1.27e-13	-0.804053	0.238	0.38	4.11e-09	0
Kpnb1	2.65e-12	-0.804159	0.182	0.305	8.54e-08	0
Larp7	4.86e-16	-0.804917	0.135	0.27	1.57e-11	0
Sf3b3	1.94e-15	-0.814516	0.203	0.345	6.25e-11	0
AU020206	9.3e-15	-0.816999	0.153	0.283	3e-10	0
Ncaph2	2.76e-18	-0.826343	0.121	0.261	8.9e-14	0
Ube2s	5.6e-12	-0.833993	0.513	0.552	1.81e-07	0
Naa10	2.69e-20	-0.834208	0.147	0.302	8.68e-16	0
Cops4	1.11e-14	-0.83573	0.235	0.374	3.6e-10	0
Uchl3	1.82e-17	-0.839601	0.146	0.288	5.89e-13	0
Arpc5l	8.67e-17	-0.84118	0.227	0.377	2.8e-12	0
Ctdspl2	6.64e-15	-0.843674	0.135	0.261	2.14e-10	0
Rsbn1l	1.87e-12	-0.847773	0.303	0.434	6.05e-08	0
Fryl	1.75e-11	-0.849804	0.303	0.426	5.64e-07	0
Zfp52	7.55e-10	-0.850844	0.151	0.252	2.44e-05	0
Taf1	9.09e-14	-0.855301	0.163	0.29	2.93e-09	0
Supt16	3.21e-13	-0.856408	0.293	0.419	1.04e-08	0
Uchl5	7.37e-20	-0.858761	0.137	0.29	2.38e-15	0
Pa2g4	1.08e-15	-0.85977	0.298	0.423	3.49e-11	0
C1qbp	4.05e-19	-0.864166	0.258	0.407	1.31e-14	0
Trim44	1.2e-11	-0.864834	0.144	0.254	3.87e-07	0
Pcna	1.55e-12	-0.868478	0.353	0.466	5e-08	0
Ilf2	2.41e-17	-0.869444	0.153	0.296	7.78e-13	0
Clec4d	6.29e-28	-0.869776	0.427	0.245	2.03e-23	0
Prmt1	6.82e-17	-0.87119	0.263	0.399	2.2e-12	0
Cirbp	6.65e-17	-0.874231	0.185	0.335	2.15e-12	0
Arhgap45	2.39e-09	-0.875045	0.315	0.43	7.72e-05	0
Usp1	2.19e-14	-0.875309	0.154	0.28	7.08e-10	0
Camk1d	5.66e-07	-0.875341	0.889	0.814	0.0182723	0
Hmgb1	7.96e-22	-0.875709	0.742	0.675	2.57e-17	0
Chd4	2.08e-12	-0.880791	0.447	0.554	6.72e-08	0
Ybx3	1.84e-18	-0.88177	0.419	0.515	5.95e-14	0
Lsm5	1.2e-17	-0.882616	0.269	0.405	3.88e-13	0
Rbbp4	1.8e-15	-0.886664	0.322	0.453	5.83e-11	0
Ubap2	5.64e-16	-0.888626	0.184	0.325	1.82e-11	0
Mrtfa	3.42e-08	-0.889167	0.256	0.357	0.00110345	0
Rcc2	2.27e-17	-0.894637	0.207	0.359	7.34e-13	0
Eef1g	3.23e-32	-0.896199	0.642	0.65	1.04e-27	0
Zdhhc18	5.1e-14	-0.900275	0.18	0.312	1.65e-09	0
2025-09-11	5.38e-12	-0.90317	0.418	0.497	1.74e-07	0
Lsm3	1.08e-18	-0.906604	0.117	0.254	3.49e-14	0
Dock10	1.3e-34	-0.908228	0.833	0.817	4.21e-30	0
Hcst	6.4e-12	-0.909486	0.263	0.387	2.07e-07	0
Rps6ka5	3.28e-13	-0.909867	0.172	0.294	1.06e-08	0
Ubr2	4.87e-14	-0.910749	0.277	0.407	1.57e-09	0
Dek	4.1e-21	-0.911297	0.431	0.541	1.32e-16	0
Hp1bp3	1.28e-17	-0.912157	0.22	0.373	4.12e-13	0
Bola3	1.31e-23	-0.916327	0.181	0.357	4.22e-19	0
Smc6	5.79e-17	-0.923287	0.235	0.386	1.87e-12	0
Dkc1	1.05e-17	-0.923847	0.136	0.274	3.38e-13	0
Atrx	1.94e-17	-0.926802	0.46	0.577	6.26e-13	0
Set	2.78e-27	-0.929054	0.627	0.635	8.96e-23	0
Fam107b	3.58e-20	-0.931454	0.403	0.536	1.16e-15	0
Tgfbr2	2.18e-11	-0.932545	0.185	0.298	7.05e-07	0
Smarcc1	5.01e-17	-0.932974	0.195	0.346	1.62e-12	0
Srpk1	8.35e-21	-0.936199	0.156	0.317	2.7e-16	0
Mif	1.26e-36	-0.939426	0.708	0.713	4.07e-32	0
Ccnd2	4.46e-22	-0.945409	0.27	0.444	1.44e-17	0
Fli1	4.13e-13	-0.948087	0.365	0.484	1.33e-08	0
Ran	3.87e-17	-0.954148	0.605	0.586	1.25e-12	0
Ctcf	1.33e-17	-0.954278	0.227	0.378	4.31e-13	0
Apobec3	1.9e-19	-0.954545	0.252	0.41	6.14e-15	0
Rapgef6	1.55e-21	-0.959394	0.527	0.626	5.01e-17	0
5031425E22Rik	4.16e-08	-0.963393	0.182	0.275	0.00134249	0
Cep57	3.1e-19	-0.967459	0.121	0.262	1e-14	0
Hnrnpa1	2.24e-28	-0.968661	0.527	0.603	7.22e-24	0
Cdk17	5.44e-17	-0.968954	0.202	0.351	1.76e-12	0
Sptbn1	6.42e-16	-0.970586	0.184	0.326	2.07e-11	0
Mdh1	1.36e-22	-0.971842	0.239	0.41	4.38e-18	0
Dnajc1	1.14e-17	-0.980464	0.435	0.542	3.68e-13	0
Maml2	1.8e-12	-0.981034	0.164	0.276	5.8e-08	0
Tbl1x	1.58e-17	-0.982928	0.237	0.388	5.1e-13	0
Tceal9	7.86e-17	-0.987589	0.121	0.253	2.54e-12	0
Rgs1	3.84e-45	-0.989494	0.469	0.656	1.24e-40	0
Fam3c	4.54e-15	-0.992206	0.136	0.26	1.46e-10	0
Rfc2	7.2e-23	-0.996115	0.157	0.325	2.33e-18	0
Cdc14a	6.86e-18	-0.998287	0.134	0.273	2.21e-13	0
Fyn	3.75e-25	-1.00753	0.332	0.511	1.21e-20	0
Mgat5	2.6e-07	-1.01098	0.362	0.426	0.00838617	0
Rad21	9.79e-20	-1.01821	0.221	0.379	3.16e-15	0
Hsp90ab1	3.81e-85	-1.02134	0.928	0.823	1.23e-80	0
Hmgn5	1.71e-19	-1.02137	0.164	0.314	5.52e-15	0
Nap1l1	3.85e-29	-1.02294	0.554	0.606	1.24e-24	0
Nudcd2	5.2e-25	-1.02552	0.125	0.293	1.68e-20	0
Ktn1	4.04e-08	-1.02759	0.252	0.353	0.00130523	0
Pop5	1.13e-23	-1.02886	0.207	0.375	3.66e-19	0
Smc3	1.54e-20	-1.03009	0.19	0.349	4.97e-16	0
Acot7	5.85e-23	-1.03066	0.197	0.371	1.89e-18	0
Exoc4	5.78e-19	-1.03635	0.504	0.609	1.87e-14	0
Cisd1	6.16e-20	-1.03952	0.183	0.331	1.99e-15	0
Carnmt1	4.15e-18	-1.03995	0.123	0.259	1.34e-13	0
Ndfip1	6.47e-30	-1.04147	0.494	0.602	2.09e-25	0
Smyd3	3.03e-16	-1.04705	0.204	0.342	9.77e-12	0
Lyar	1.57e-22	-1.04933	0.197	0.36	5.06e-18	0
Baz1b	5.33e-18	-1.05361	0.208	0.363	1.72e-13	0
Exosc8	6.84e-25	-1.05693	0.173	0.343	2.21e-20	0
Galk1	1.04e-22	-1.057	0.119	0.273	3.36e-18	0
Mtf2	5.74e-19	-1.05837	0.146	0.294	1.85e-14	0
Xpo1	2.05e-21	-1.05856	0.243	0.412	6.61e-17	0
AC149090.1	1.42e-13	-1.06351	0.207	0.337	4.6e-09	0
Peak1	3.23e-09	-1.07435	0.455	0.548	0.000104134	0
Rasa2	2.54e-11	-1.08154	0.231	0.349	8.2e-07	0
Plaat3	7.93e-29	-1.08198	0.162	0.352	2.56e-24	0
Nfkbia	1.54e-22	-1.08588	0.703	0.741	4.98e-18	0
H2afv	8.13e-26	-1.08849	0.204	0.383	2.62e-21	0
Atp10a	2.51e-12	-1.09191	0.164	0.275	8.1e-08	0
Rfx7	6.64e-22	-1.1018	0.19	0.36	2.14e-17	0
Runx2	7.67e-21	-1.10238	0.215	0.377	2.48e-16	0
Rad50	2.66e-23	-1.10327	0.102	0.255	8.58e-19	0
Nr4a2	8.43e-19	-1.10545	0.232	0.374	2.72e-14	0
Aak1	2.55e-18	-1.10623	0.175	0.324	8.24e-14	0
Id2	2.45e-37	-1.10883	0.538	0.665	7.91e-33	0
Ciapin1	1.36e-18	-1.10956	0.165	0.312	4.39e-14	0
Tnrc6b	1.32e-16	-1.11174	0.305	0.451	4.25e-12	0
Prkacb	2.02e-21	-1.1131	0.108	0.255	6.52e-17	0
Snrnp25	2.53e-25	-1.11679	0.116	0.281	8.17e-21	0
Mtmr12	8.3e-20	-1.11742	0.133	0.28	2.68e-15	0
Cenpa	3.73e-22	-1.12088	0.179	0.334	1.2e-17	0
Nasp	2.25e-28	-1.1239	0.303	0.47	7.26e-24	0
Npm1	2.53e-50	-1.13148	0.837	0.733	8.18e-46	0
Foxo1	5e-22	-1.13151	0.109	0.256	1.62e-17	0
Suz12	6.08e-23	-1.1335	0.21	0.382	1.96e-18	0
Nfatc1	7.51e-17	-1.14142	0.155	0.292	2.42e-12	0
Akna	1.33e-17	-1.1417	0.133	0.27	4.29e-13	0
Ccng1	3.31e-20	-1.14287	0.136	0.282	1.07e-15	0
Chd2	8.75e-29	-1.14481	0.461	0.603	2.82e-24	0
Dpy30	6.42e-29	-1.14502	0.141	0.325	2.07e-24	0
Paics	3.38e-27	-1.14645	0.13	0.306	1.09e-22	0
Def6	4.2e-21	-1.147	0.141	0.295	1.36e-16	0
Gse1	1.69e-19	-1.14875	0.183	0.336	5.45e-15	0
Il1rn	1.75e-15	-1.1552	0.268	0.157	5.65e-11	0
Ttc39b	1.58e-21	-1.15682	0.167	0.33	5.1e-17	0
Fkbp4	4.22e-23	-1.15761	0.113	0.267	1.36e-18	0
Hspd1	2.32e-24	-1.1633	0.395	0.511	7.49e-20	0
Lmnb1	1.08e-23	-1.16415	0.318	0.477	3.49e-19	0
Sdhaf1	4.09e-21	-1.1869	0.112	0.257	1.32e-16	0
Slbp	8.53e-21	-1.19011	0.205	0.364	2.75e-16	0
Ncl	1.77e-59	-1.19116	0.769	0.764	5.71e-55	0
Pds5b	7.21e-19	-1.19205	0.141	0.284	2.33e-14	0
Ugcg	5.78e-20	-1.19446	0.255	0.404	1.87e-15	0
Relb	9.09e-15	-1.20243	0.191	0.32	2.94e-10	0
Dnmt3a	6.92e-19	-1.20785	0.143	0.285	2.23e-14	0
Tmem123	6.16e-10	-1.21059	0.235	0.344	1.99e-05	0
Akap13	1.27e-57	-1.21119	0.656	0.735	4.09e-53	0
Iqsec1	4.12e-10	-1.21212	0.184	0.292	1.33e-05	0
Cep192	5.41e-26	-1.21697	0.093	0.254	1.75e-21	0
Fchsd2	2.37e-16	-1.22886	0.175	0.307	7.65e-12	0
Nudt5	1.3e-26	-1.23227	0.11	0.274	4.2e-22	0
Tnfaip3	1.71e-29	-1.23673	0.347	0.526	5.53e-25	0
Cks2	4.83e-30	-1.24288	0.187	0.377	1.56e-25	0
Mrps6	1.1e-27	-1.25547	0.116	0.289	3.56e-23	0
Mir142hg	3.58e-15	-1.25884	0.53	0.636	1.16e-10	0
Dennd4a	7.93e-63	-1.26925	0.654	0.753	2.56e-58	0
Ckap5	6.17e-22	-1.27001	0.12	0.269	1.99e-17	0
Sms	4.73e-33	-1.27079	0.206	0.402	1.53e-28	0
Cyfip2	4.29e-35	-1.29662	0.179	0.389	1.38e-30	0
Lrrk1	8.71e-29	-1.29902	0.277	0.461	2.81e-24	0
Prrc2b	1.56e-27	-1.32386	0.124	0.3	5.03e-23	0
Runx3	7.89e-33	-1.3288	0.337	0.507	2.55e-28	0
Itgav	3.47e-20	-1.33213	0.304	0.435	1.12e-15	0
Cntrl	1.06e-23	-1.33226	0.216	0.387	3.44e-19	0
Atad2	1.54e-28	-1.3433	0.162	0.343	4.96e-24	0
Pik3r1	8.12e-21	-1.35581	0.291	0.45	2.62e-16	0
Sipa1l1	2.26e-29	-1.3586	0.242	0.435	7.31e-25	0
Kmt2a	1.24e-27	-1.36264	0.199	0.388	4.01e-23	0
Vars	1.57e-27	-1.3664	0.14	0.321	5.08e-23	0
Nudt4	2.19e-12	-1.36891	0.154	0.269	7.06e-08	0
Nop56	1.34e-24	-1.37093	0.249	0.418	4.34e-20	0
Cbx3	2.01e-36	-1.37465	0.287	0.472	6.48e-32	0
Nucks1	3.32e-38	-1.38588	0.318	0.494	1.07e-33	0
Phf6	6.01e-26	-1.39064	0.11	0.273	1.94e-21	0
Hmgn2	2.45e-26	-1.39084	0.138	0.305	7.91e-22	0
Dusp2	1.04e-35	-1.39767	0.223	0.426	3.37e-31	0
Nsmaf	3.55e-24	-1.41053	0.127	0.287	1.15e-19	0
Selenoh	6.57e-35	-1.41797	0.23	0.411	2.12e-30	0
Tbrg1	8.96e-37	-1.42189	0.148	0.364	2.89e-32	0
mt-Nd1	5.46e-17	-1.42345	0.897	0.834	1.76e-12	0
Smc4	2.37e-37	-1.42346	0.202	0.406	7.66e-33	0
H2afx	1.27e-23	-1.4281	0.128	0.284	4.1e-19	0
Cd69	5.25e-42	-1.44188	0.19	0.415	1.7e-37	0
Ssrp1	1.15e-36	-1.44329	0.173	0.38	3.71e-32	0
Mcm4	3.74e-29	-1.44439	0.085	0.251	1.21e-24	0
Tex14	1.62e-08	-1.44938	0.227	0.322	0.000523064	0
Tpm1	1.42e-29	-1.45812	0.092	0.263	4.57e-25	0
Dnmt1	1.13e-30	-1.46746	0.12	0.303	3.65e-26	0
Dtymk	4.77e-37	-1.46851	0.131	0.333	1.54e-32	0
Sae1	4.08e-37	-1.47403	0.133	0.345	1.32e-32	0
4930523C07Rik	1.85e-34	-1.47466	0.257	0.453	5.96e-30	0
mt-Cytb	4.98e-17	-1.48577	0.974	0.901	1.61e-12	0
Atxn1	3.56e-35	-1.49766	0.407	0.546	1.15e-30	0
Mllt3	5.43e-31	-1.50077	0.137	0.325	1.75e-26	0
Tubb4b	5.61e-31	-1.5019	0.306	0.46	1.81e-26	0
Aebp2	4.25e-33	-1.50664	0.177	0.38	1.37e-28	0
Rbbp7	1.59e-39	-1.51193	0.188	0.405	5.12e-35	0
D16Ertd472e	6.54e-34	-1.51404	0.156	0.349	2.11e-29	0
Bex3	4.64e-35	-1.52198	0.078	0.261	1.5e-30	0
Msi2	5.3e-32	-1.52337	0.211	0.405	1.71e-27	0
Nabp1	1.58e-20	-1.52564	0.284	0.447	5.09e-16	0
Plscr1	8.32e-23	-1.52604	0.11	0.254	2.69e-18	0
Pabpc4	5.23e-31	-1.52764	0.189	0.387	1.69e-26	0
mt-Nd5	3.63e-07	-1.53072	0.778	0.746	0.0117056	0
Impdh2	3.16e-39	-1.5335	0.124	0.334	1.02e-34	0
H2-Eb1	2.21e-11	-1.53972	0.327	0.416	7.13e-07	0
mt-Nd3	1.04e-15	-1.54251	0.377	0.515	3.37e-11	0
Casp3	2.9e-37	-1.54987	0.222	0.414	9.36e-33	0
Chst11	7.99e-44	-1.57144	0.194	0.433	2.58e-39	0
Pdcd4	4.52e-34	-1.57248	0.25	0.451	1.46e-29	0
Rif1	7.79e-32	-1.57383	0.113	0.298	2.51e-27	0
Grap2	2.93e-29	-1.57542	0.103	0.269	9.47e-25	0
Ptpn4	2.48e-28	-1.57957	0.108	0.276	7.99e-24	0
Egr1	1.09e-06	-1.58485	0.366	0.448	0.0350441	0
Pitpnc1	1.42e-35	-1.58715	0.253	0.453	4.6e-31	0
Fkbp3	4.19e-42	-1.59527	0.222	0.424	1.35e-37	0
Dynll2	5.41e-46	-1.60738	0.115	0.346	1.75e-41	0
S100a8	6.74e-26	-1.6097	0.339	0.185	2.18e-21	0
Eif2ak3	1.39e-26	-1.63463	0.115	0.277	4.49e-22	0
mt-Nd2	1.88e-26	-1.63641	0.862	0.831	6.08e-22	0
Pde7a	6.46e-31	-1.64054	0.096	0.271	2.09e-26	0
Csrp1	3.15e-31	-1.64516	0.103	0.282	1.02e-26	0
Tut4	1.04e-39	-1.64666	0.184	0.408	3.35e-35	0
mt-Nd4l	9.54e-10	-1.64984	0.492	0.586	3.08e-05	0
Rcsd1	6.7e-31	-1.654	0.163	0.348	2.16e-26	0
Ccl4	7.25e-09	-1.65842	0.442	0.511	0.000234114	0
Psip1	6.65e-38	-1.66921	0.114	0.32	2.15e-33	0
Vgll4	3.92e-42	-1.67358	0.156	0.381	1.27e-37	0
Dusp5	1.42e-35	-1.6737	0.212	0.425	4.57e-31	0
Orc6	1.45e-33	-1.71894	0.091	0.273	4.68e-29	0
Dctpp1	2.05e-42	-1.72025	0.113	0.327	6.63e-38	0
A930015D03Rik	3.43e-13	-1.72864	0.159	0.27	1.11e-08	0
Rab27a	2.3e-29	-1.73421	0.097	0.264	7.42e-25	0
2025-09-06	9.83e-40	-1.73423	0.113	0.324	3.17e-35	0
Gmnn	3.36e-40	-1.73549	0.106	0.312	1.08e-35	0
Ifi27	1.28e-36	-1.74421	0.112	0.31	4.12e-32	0
Snhg15	6.97e-33	-1.74681	0.101	0.284	2.25e-28	0
Il18rap	6.85e-33	-1.75487	0.158	0.348	2.21e-28	0
Tubb5	5.28e-78	-1.75738	0.471	0.643	1.7e-73	0
Birc2	1.77e-30	-1.76003	0.109	0.285	5.73e-26	0
Rpa1	1.11e-39	-1.76215	0.068	0.264	3.57e-35	0
Polr2a	1.25e-18	-1.76316	0.367	0.519	4.05e-14	0
Zbtb20	3.06e-38	-1.76328	0.217	0.43	9.87e-34	0
Hmgn1	3.74e-42	-1.76646	0.115	0.329	1.21e-37	0
Strbp	1.88e-30	-1.79372	0.094	0.266	6.06e-26	0
Rnf157	1.97e-34	-1.80698	0.095	0.283	6.35e-30	0
Prkch	9.68e-48	-1.8091	0.304	0.511	3.13e-43	0
Smad7	1.08e-39	-1.81535	0.16	0.379	3.5e-35	0
Rangap1	7.92e-40	-1.82198	0.108	0.317	2.56e-35	0
Rinl	3.02e-43	-1.84312	0.086	0.304	9.75e-39	0
Ccdc88c	1.02e-41	-1.85345	0.118	0.337	3.31e-37	0
Cd9	3.45e-19	-1.85871	0.258	0.406	1.11e-14	0
Cmc2	1.79e-45	-1.86091	0.084	0.305	5.79e-41	0
Ssbp3	1.58e-33	-1.86632	0.078	0.255	5.09e-29	0
Spp1	1.56e-35	-1.87541	0.288	0.467	5.04e-31	0
Topbp1	1.09e-41	-1.88229	0.087	0.297	3.51e-37	0
Ptpn22	7.78e-54	-1.90066	0.204	0.451	2.51e-49	0
Kif13b	1.2e-45	-1.91438	0.206	0.426	3.87e-41	0
Gramd1b	1.45e-40	-1.92239	0.177	0.399	4.67e-36	0
Ptp4a3	7.41e-41	-1.94655	0.077	0.278	2.39e-36	0
Samsn1	1.14e-52	-1.98418	0.349	0.587	3.69e-48	0
Hmgb2	1.21e-68	-1.99102	0.638	0.704	3.89e-64	0
Pde3b	9.72e-44	-2.02053	0.097	0.314	3.14e-39	0
Bcl2	2.02e-29	-2.04989	0.134	0.308	6.52e-25	0
Il21r	1.49e-35	-2.07647	0.079	0.258	4.81e-31	0
Ezh2	4.51e-53	-2.09421	0.109	0.354	1.46e-48	0
Chsy1	8.43e-43	-2.0996	0.109	0.324	2.72e-38	0
Lrba	1.62e-51	-2.17081	0.097	0.336	5.22e-47	0
Hist1h1e	3.19e-34	-2.22582	0.138	0.316	1.03e-29	0
Cd82	3.39e-52	-2.23373	0.119	0.36	1.1e-47	0
Prkca	1.08e-39	-2.23891	0.075	0.269	3.49e-35	0
Pglyrp1	3.67e-56	-2.24316	0.112	0.359	1.18e-51	0
Sema4d	3.7e-71	-2.28811	0.214	0.5	1.19e-66	0
Pola1	1.41e-48	-2.31861	0.101	0.326	4.55e-44	0
Cks1b	7.3e-56	-2.35727	0.054	0.291	2.36e-51	0
Cblb	1.09e-84	-2.39529	0.239	0.535	3.53e-80	0
Nr4a3	4.41e-48	-2.40061	0.086	0.311	1.42e-43	0
Rrm1	3.33e-50	-2.40418	0.055	0.275	1.07e-45	0
Cenpw	4.81e-55	-2.4238	0.042	0.272	1.55e-50	0
Serpinb6a	2.44e-47	-2.46688	0.062	0.275	7.86e-43	0
Tfrc	1.03e-42	-2.46936	0.058	0.257	3.32e-38	0
Nup210	8.32e-56	-2.47913	0.072	0.317	2.69e-51	0
Pkp4	4.83e-54	-2.48695	0.106	0.343	1.56e-49	0
Klrk1	8.94e-64	-2.48978	0.113	0.378	2.89e-59	0
Stmn1	3.19e-61	-2.49466	0.169	0.408	1.03e-56	0
Rras2	2.42e-46	-2.49485	0.047	0.251	7.82e-42	0
Kdm2b	2.83e-61	-2.49962	0.148	0.411	9.14e-57	0
Dnajc9	6.08e-53	-2.53139	0.053	0.279	1.96e-48	0
Airn	7.24e-51	-2.5508	0.079	0.309	2.34e-46	0
Bach2	2.17e-41	-2.55158	0.093	0.293	6.99e-37	0
Traf1	4.05e-83	-2.55466	0.134	0.457	1.31e-78	0
Pde4d	2.09e-27	-2.58096	0.131	0.292	6.76e-23	0
AW112010	6.06e-79	-2.62579	0.326	0.555	1.96e-74	0
Rbl2	5.6e-64	-2.66734	0.083	0.352	1.81e-59	0
Mcm5	1.34e-52	-2.67347	0.047	0.272	4.34e-48	0
H2-Q7	3.4e-111	-2.7033	0.164	0.53	1.1e-106	0
Stk39	5.8e-76	-2.7398	0.093	0.392	1.87e-71	0
Mcm6	9.89e-61	-2.77523	0.06	0.308	3.19e-56	0
Mcm3	8.79e-60	-2.78023	0.05	0.296	2.84e-55	0
H2-Q6	4.37e-54	-2.78606	0.047	0.277	1.41e-49	0
Cdca8	4.92e-52	-2.81937	0.039	0.255	1.59e-47	0
Plekha5	1.31e-54	-2.82282	0.05	0.281	4.22e-50	0
Tipin	1.65e-58	-2.8389	0.049	0.29	5.33e-54	0
Cbx5	1.71e-52	-2.86624	0.05	0.273	5.53e-48	0
Ms4a4b	3.42e-52	-2.89503	0.095	0.319	1.1e-47	0
Hells	7.16e-53	-2.92406	0.035	0.253	2.31e-48	0
Cobll1	2.62e-56	-2.97264	0.05	0.286	8.46e-52	0
Card11	9.12e-56	-2.99809	0.044	0.275	2.94e-51	0
Tyms	2.11e-56	-3.09311	0.034	0.261	6.81e-52	0
Mcm7	5.01e-68	-3.11909	0.049	0.314	1.62e-63	0
Mir155hg	2.36e-54	-3.15879	0.035	0.257	7.62e-50	0
Tnfrsf18	1.42e-58	-3.20919	0.034	0.269	4.59e-54	0
Gm26917	7.09e-33	-3.23494	0.379	0.559	2.29e-28	0
Srgap3	1.31e-70	-3.24674	0.061	0.337	4.23e-66	0
Mctp2	7.87e-64	-3.33302	0.04	0.292	2.54e-59	0
Rabgap1l	3.28e-115	-3.3676	0.157	0.525	1.06e-110	0
Rad51b	7.79e-56	-3.38932	0.036	0.262	2.51e-51	0
Zeb1	3.63e-83	-3.42567	0.059	0.369	1.17e-78	0
Pclaf	4.4e-73	-3.45431	0.072	0.344	1.42e-68	0
Birc5	2.69e-69	-3.48533	0.046	0.309	8.69e-65	0
Smc2	5.87e-62	-3.50891	0.034	0.275	1.89e-57	0
Lig1	2.39e-75	-3.52896	0.035	0.315	7.73e-71	0
Osbpl3	2.15e-94	-3.64675	0.049	0.381	6.93e-90	0
Ltb	9.48e-66	-3.69362	0.036	0.29	3.06e-61	0
Mki67	6.5e-75	-3.69543	0.057	0.34	2.1e-70	0
Diaph3	1.67e-69	-3.73194	0.041	0.307	5.38e-65	0
Cd2	3.54e-72	-3.80205	0.029	0.298	1.14e-67	0
Top2a	4.69e-75	-3.84974	0.049	0.327	1.51e-70	0
Gem	5.5e-72	-3.88422	0.026	0.293	1.78e-67	0
Grap	7.46e-64	-3.89767	0.021	0.263	2.41e-59	0
Phgdh	8.01e-71	-3.90104	0.022	0.283	2.58e-66	0
Ccl5	1.19e-90	-3.96687	0.11	0.431	3.85e-86	0
Dut	3.67e-97	-3.97819	0.064	0.393	1.18e-92	0
Ets1	5.82e-90	-4.04097	0.034	0.353	1.88e-85	0
Ikzf3	8.07e-79	-4.04556	0.026	0.312	2.6e-74	0
Serpinb9	3.58e-74	-4.19186	0.025	0.296	1.16e-69	0
Inpp4b	4.24e-69	-4.24377	0.032	0.293	1.37e-64	0
Arsb	3.42e-85	-4.25712	0.041	0.346	1.11e-80	0
Hist1h1b	6.25e-56	-4.3132	0.048	0.269	2.02e-51	0
Txk	4.48e-76	-4.39128	0.022	0.297	1.45e-71	0
Stat4	4.04e-88	-4.4511	0.043	0.357	1.31e-83	0
Tnik	1.44e-65	-4.52582	0.014	0.256	4.64e-61	0
Tox	4.3e-74	-4.66411	0.029	0.3	1.39e-69	0
Sytl3	7.06e-82	-4.72099	0.014	0.301	2.28e-77	0
Cd3g	1.88e-61	-4.72264	0.024	0.254	6.07e-57	0
Tnfrsf9	1.17e-114	-4.75739	0.028	0.399	3.77e-110	0
Ctla2a	9.06e-91	-4.79933	0.031	0.345	2.93e-86	0
Thy1	9.96e-95	-4.84753	0.023	0.344	3.22e-90	0
Gimap5	2.27e-66	-4.88467	0.01	0.252	7.33e-62	0
Ablim1	6.24e-78	-4.88628	0.016	0.293	2.01e-73	0
Gm2682	3.14e-66	-4.90443	0.026	0.273	1.01e-61	0
2025-09-01	1.62e-97	-4.92311	0.022	0.35	5.24e-93	0
Ppp1r16b	5.54e-87	-4.9337	0.017	0.319	1.79e-82	0
Trbc2	4.51e-83	-4.94618	0.036	0.328	1.45e-78	0
Skap1	5.59e-110	-4.95601	0.028	0.389	1.81e-105	0
Lck	3.41e-78	-4.95701	0.015	0.292	1.1e-73	0
Klrd1	3.38e-93	-4.97695	0.034	0.352	1.09e-88	0
Ctsw	1.87e-93	-5.02704	0.018	0.335	6.04e-89	0
Sh2d2a	2.04e-104	-5.03311	0.021	0.365	6.58e-100	0
Dscam	2.21e-81	-5.03771	0.036	0.325	7.14e-77	0
Prf1	3.52e-100	-5.04054	0.037	0.373	1.14e-95	0
Cd28	1.11e-65	-5.10257	0.011	0.251	3.59e-61	0
Gzmb	2.96e-103	-5.13413	0.054	0.396	9.56e-99	0
Gzma	5.6e-55	-5.14865	0.105	0.332	1.81e-50	0
Ifng	1.29e-74	-5.18311	0.029	0.303	4.16e-70	0
Nkg7	1.34e-111	-5.18634	0.05	0.406	4.33e-107	0
Ptprcap	2e-119	-5.195	0.029	0.406	6.44e-115	0
Kcnq5	9.21e-97	-5.20618	0.035	0.363	2.97e-92	0
Cd247	6.91e-71	-5.22978	0.012	0.267	2.23e-66	0
Gimap4	1.07e-91	-5.24625	0.014	0.326	3.45e-87	0
Itk	7.36e-112	-5.29089	0.031	0.392	2.38e-107	0
Gimap6	5.39e-85	-5.3011	0.016	0.311	1.74e-80	0
Setbp1	2.47e-69	-5.3193	0.015	0.267	7.98e-65	0
Trbc1	1.02e-66	-5.3201	0.017	0.26	3.28e-62	0
Camk4	1.51e-77	-5.3246	0.016	0.29	4.88e-73	0
Il2rb	4.67e-125	-5.32647	0.028	0.418	1.51e-120	0
Gzmc	7.15e-55	-5.35551	0.127	0.354	2.31e-50	0
Nrgn	1.66e-72	-5.46463	0.008	0.266	5.35e-68	0
Tmem163	2.91e-88	-5.51844	0.015	0.318	9.39e-84	0
Il18r1	1.23e-75	-5.52293	0.013	0.281	3.97e-71	0
Serpinb6b	4.92e-89	-5.59742	0.015	0.32	1.59e-84	0
Gimap1	2.47e-83	-5.67772	0.008	0.296	7.98e-79	0
Gzmc	0	3.98114	0.903	0.255	0	1
Gzme	1.41e-167	3.47046	0.257	0.035	4.54e-163	1
Khdc1a	0	3.35987	0.402	0.032	0	1
Gzmd	4.25e-161	3.26528	0.271	0.041	1.37e-156	1
Klrg1	0	3.23557	0.619	0.065	0	1
Ccdc184	0	3.09324	0.465	0.049	0	1
Car2	0	2.91488	0.749	0.088	0	1
Ncr1	0	2.91099	0.821	0.084	0	1
Pdgfa	0	2.90834	0.522	0.051	0	1
Klra3	3.68e-224	2.89875	0.301	0.034	1.19e-219	1
Cd55	0	2.81441	0.586	0.094	0	1
Klra7	0	2.80334	0.587	0.076	0	1
Klre1	0	2.71174	0.91	0.127	0	1
Dixdc1	1.1e-277	2.6473	0.335	0.032	3.54e-273	1
Gm44040	9.89e-213	2.61349	0.324	0.044	3.19e-208	1
Gipc2	1.97e-192	2.55151	0.281	0.036	6.35e-188	1
Gzma	0	2.53606	0.813	0.242	0	1
Xcl1	0	2.48804	0.763	0.141	0	1
Prf1	0	2.43131	0.942	0.258	0	1
Klrb1f	0	2.41275	0.496	0.057	0	1
Gzmb	0	2.40333	0.924	0.284	0	1
Atp1b1	0	2.38735	0.474	0.046	0	1
Klrb1a	1.49e-220	2.30051	0.306	0.036	4.8e-216	1
Gm19585	1.14e-299	2.29236	0.528	0.09	3.68e-295	1
Hist1h2ag	9.37e-209	2.27075	0.359	0.057	3.02e-204	1
Samd3	0	2.23598	0.551	0.064	0	1
Klrb1c	0	2.22857	0.685	0.085	0	1
Klri2	0	2.22435	0.53	0.067	0	1
Gm32509	2.18e-267	2.21954	0.383	0.049	7.04e-263	1
Kcnip3	0	2.2195	0.427	0.049	0	1
Lockd	3.53e-305	2.1855	0.636	0.139	1.14e-300	1
Dscam	0	2.18102	0.88	0.218	0	1
Gimap7	0	2.17409	0.723	0.153	0	1
Rrm2	1.79e-271	2.15718	0.613	0.144	5.79e-267	1
Cst7	0	2.13666	0.73	0.153	0	1
Hist1h3c	1.16e-270	2.12592	0.596	0.132	3.75e-266	1
Cd320	7.42e-120	2.11039	0.26	0.051	2.4e-115	1
Pglyrp1	0	2.10299	0.918	0.257	0	1
Klra8	1.02e-293	2.10056	0.413	0.05	3.31e-289	1
Ctla2b	0	2.07631	0.554	0.095	0	1
C1qtnf6	5.48e-274	2.05125	0.49	0.084	1.77e-269	1
Klrd1	0	2.04084	0.931	0.238	0	1
Hist1h2ae	3.25e-217	2.03478	0.613	0.175	1.05e-212	1
Cks1b	0	2.0337	0.768	0.2	0	1
Stmn1	0	2.02623	0.937	0.31	0	1
Ctsw	0	2.02374	0.924	0.22	0	1
Alad	1.92e-235	2.02161	0.492	0.1	6.19e-231	1
Cenps	7.2e-175	2.01158	0.409	0.09	2.32e-170	1
Clnk	0	2.01158	0.612	0.084	0	1
Dapk2	0	2.01061	0.45	0.058	0	1
Styk1	1.1e-276	1.98822	0.393	0.048	3.54e-272	1
Trbc1	0	1.97818	0.909	0.147	0	1
Klra9	2.14e-222	1.97793	0.32	0.039	6.91e-218	1
Hist2h2ac	2.59e-170	1.9768	0.463	0.119	8.37e-166	1
Klra4	9.66e-207	1.97633	0.344	0.05	3.12e-202	1
Cdkn3	4.89e-154	1.96659	0.406	0.099	1.58e-149	1
Gm17745	1.16e-281	1.96541	0.525	0.095	3.74e-277	1
Ctla2a	0	1.95947	0.92	0.232	0	1
Tyms	6.75e-303	1.94354	0.708	0.175	2.18e-298	1
Kcnk10	3.43e-203	1.93824	0.317	0.043	1.11e-198	1
Pclaf	0	1.93637	0.857	0.244	0	1
Hist1h4d	4.77e-209	1.93239	0.609	0.173	1.54e-204	1
Hist1h2ab	4.44e-167	1.91714	0.422	0.099	1.43e-162	1
Zbtb32	5.02e-165	1.91141	0.325	0.059	1.62e-160	1
Nusap1	3.12e-191	1.89164	0.493	0.123	1.01e-186	1
Gimap6	0	1.86806	0.88	0.201	0	1
Spc24	3.69e-286	1.86739	0.673	0.162	1.19e-281	1
Cenpw	0	1.86718	0.739	0.183	0	1
Spc25	2.88e-142	1.86644	0.366	0.087	9.29e-138	1
Txk	0	1.85884	0.911	0.184	0	1
Trp53i11	3.72e-263	1.85677	0.567	0.121	1.2e-258	1
Thy1	0	1.85669	0.905	0.232	0	1
Klrc2	7.53e-207	1.85032	0.429	0.084	2.43e-202	1
Cenpm	2.3e-186	1.85021	0.448	0.102	7.42e-182	1
Hist1h2an	3.81e-183	1.84722	0.459	0.109	1.23e-178	1
Ms4a4b	0	1.84544	0.864	0.221	0	1
Fdx1	4.79e-221	1.83663	0.626	0.177	1.55e-216	1
Birc5	2.04e-291	1.83396	0.772	0.217	6.59e-287	1
Sgo1	1.36e-119	1.8337	0.283	0.061	4.38e-115	1
2900026A02Rik	0	1.82206	0.613	0.109	0	1
Hist1h1b	5.16e-164	1.81512	0.589	0.2	1.67e-159	1
Cdc20	2.86e-162	1.8076	0.403	0.094	9.22e-158	1
Fbxo5	1.44e-119	1.80572	0.29	0.064	4.64e-115	1
Gm15518	1.33e-285	1.80458	0.493	0.081	4.28e-281	1
Cdca3	1.48e-216	1.80383	0.565	0.143	4.78e-212	1
Ska1	1.8e-122	1.8015	0.324	0.078	5.81e-118	1
Phgdh	0	1.79925	0.763	0.189	0	1
Depdc1a	4.38e-115	1.79014	0.28	0.061	1.41e-110	1
Plk1	4.79e-152	1.78939	0.369	0.084	1.55e-147	1
Magohb	3.79e-272	1.78761	0.732	0.208	1.22e-267	1
Gimap4	0	1.78753	0.881	0.216	0	1
Nedd4	0	1.78442	0.66	0.14	0	1
Mad2l1	3.68e-170	1.78281	0.431	0.102	1.19e-165	1
D5Ertd615e	9.49e-191	1.78	0.271	0.032	3.06e-186	1
Tnfrsf9	0	1.77862	0.921	0.284	0	1
Ube2c	8.18e-172	1.7718	0.571	0.174	2.64e-167	1
Hist1h2ap	6.03e-140	1.77101	0.368	0.088	1.95e-135	1
Hist1h3i	3.2e-120	1.77034	0.305	0.07	1.03e-115	1
Hmgb3	3.34e-194	1.75927	0.512	0.127	1.08e-189	1
Snap47	1.75e-151	1.75046	0.301	0.054	5.64e-147	1
Gimap5	0	1.75004	0.715	0.162	0	1
2025-09-01	0	1.74915	0.894	0.238	0	1
Bspry	3.23e-149	1.74858	0.364	0.082	1.04e-144	1
Tmsb15b2	5.84e-116	1.74538	0.255	0.05	1.88e-111	1
Myo10	1.32e-251	1.73613	0.594	0.137	4.27e-247	1
Il2rb	0	1.73117	0.983	0.296	0	1
Cdk1	5.37e-199	1.72499	0.517	0.13	1.73e-194	1
Spata24	9.65e-106	1.71722	0.279	0.065	3.11e-101	1
Sigirr	1.04e-171	1.71591	0.361	0.07	3.37e-167	1
Ccna2	6.12e-192	1.71171	0.501	0.124	1.98e-187	1
Hist1h2bj	1.61e-170	1.70877	0.374	0.077	5.2e-166	1
Hist1h3a	3.48e-127	1.70126	0.273	0.053	1.12e-122	1
Cdca8	1.24e-230	1.70092	0.648	0.177	3.99e-226	1
Gimap9	3.86e-206	1.6985	0.465	0.099	1.24e-201	1
Serpinb6a	1.39e-292	1.69636	0.729	0.19	4.49e-288	1
Lyrm9	2.39e-171	1.69023	0.443	0.106	7.71e-167	1
Cenph	4.46e-137	1.6749	0.387	0.099	1.44e-132	1
Klrk1	0	1.67428	0.893	0.278	0	1
Aurkb	5.01e-122	1.67091	0.332	0.081	1.62e-117	1
Ptpn3	4.47e-194	1.66815	0.381	0.068	1.44e-189	1
Kif22	1.99e-117	1.66709	0.32	0.078	6.41e-113	1
Klrc1	2.36e-127	1.66619	0.407	0.117	7.63e-123	1
Rad51	4.57e-166	1.66573	0.452	0.114	1.47e-161	1
F2r	9.65e-176	1.66332	0.38	0.077	3.11e-171	1
Ccnb2	1.85e-216	1.65011	0.589	0.154	5.97e-212	1
Hmmr	5.14e-192	1.64968	0.485	0.118	1.66e-187	1
Sh2d1a	1e-255	1.64719	0.626	0.149	3.23e-251	1
Kcnq5	0	1.64465	0.879	0.256	0	1
Cfap53	2.51e-190	1.63632	0.319	0.047	8.11e-186	1
Melk	7.19e-117	1.63234	0.298	0.068	2.32e-112	1
Ptprcap	0	1.62978	0.972	0.286	0	1
Ccnb1	7.98e-147	1.62737	0.412	0.106	2.58e-142	1
Serpinb9	0	1.62562	0.815	0.195	0	1
Sema6d	1.78e-236	1.62121	0.531	0.113	5.74e-232	1
Eomes	0	1.61864	0.664	0.122	0	1
Rfc5	1.14e-165	1.61626	0.496	0.135	3.68e-161	1
Tk1	6.53e-208	1.61489	0.548	0.138	2.11e-203	1
Eya1	2.77e-150	1.61031	0.25	0.036	8.93e-146	1
Gm36723	0	1.60152	0.702	0.153	0	1
Rad51ap1	2.63e-119	1.59353	0.316	0.075	8.51e-115	1
Dusp19	2.34e-93	1.58494	0.252	0.06	7.55e-89	1
Serpinb6b	0	1.58237	0.826	0.216	0	1
Nup43	1.82e-98	1.57837	0.312	0.085	5.87e-94	1
Spry2	1.76e-297	1.5734	0.578	0.108	5.69e-293	1
Arsb	0	1.569	0.882	0.239	0	1
Nop10	4.4e-272	1.5629	0.912	0.381	1.42e-267	1
[truncated: 34,565 more rows]
