# Supplementary material for: Vaccination rescues dysfunctional T cell therapy by amplifying rare stem-like antitumor CD8+ T cells
Source: Research Square preprint supplement (doi:10.21203/rs.3.rs-8941883/v1), 2026-03-13
Supplement: Supplementary file 4 [file fe6b16a4e8c9f44ef3d89c62.xlsx]

## Sheet: TIL Rx Cluster DEG
gene	p_val	avg_log2FC	pct.1	pct.2	p_val_adj	cluster
HIST2H2AB	2.5e-51	7.28973	0.562	0.059	7.79e-48	0
CDCA3	1.72e-16	5.53585	0.505	0.064	5.37e-13	0
HIST1H2BH	1.48e-65	5.26461	0.586	0.062	4.6e-62	0
MT2A	9.93e-28	5.13577	0.485	0.149	3.1e-24	0
HIST1H3F	1.14e-179	5.10812	0.792	0.071	3.55e-176	0
LMNB1	2.35e-24	4.9755	0.53	0.177	7.33e-21	0
CDK1	4.39e-87	4.87507	0.697	0.123	1.37e-83	0
HIST1H2BF	8.15e-57	4.83896	0.542	0.05	2.54e-53	0
HIST1H1C	2.28e-263	4.77194	0.899	0.262	7.11e-260	0
HIST2H2BF	3.97e-21	4.47472	0.478	0.044	1.24e-17	0
CDKN3	5.42e-75	4.46927	0.67	0.135	1.69e-71	0
HIST1H3D	5.55e-300	4.4368	0.91	0.121	1.73e-296	0
HIST1H3B	0	4.42835	0.968	0.111	0	0
HIST1H4C	0	4.41584	0.999	0.123	0	0
HIST1H4D	1.09e-146	4.35381	0.692	0.071	3.41e-143	0
HIST1H1E	0	4.2832	0.976	0.23	0	0
STMN1	0	4.26836	0.965	0.267	0	0
KIF11	3.84e-61	4.22857	0.635	0.148	1.2e-57	0
TUBB	0	4.21457	0.937	0.226	0	0
KIF14	1.03e-07	4.15274	0.476	0.102	0.000319781	0
APOBEC3B	3.53e-46	4.05793	0.613	0.13	1.1e-42	0
HIST1H4H	2e-08	3.98618	0.442	0.084	6.22e-05	0
ISG15	1.97e-10	3.95254	0.253	0.204	6.15e-07	0
HIST2H2AC	5.61e-142	3.95154	0.746	0.24	1.75e-138	0
UBALD2	1.03e-26	3.92817	0.603	0.314	3.22e-23	0
HIST1H3C	8.64e-157	3.90643	0.748	0.077	2.69e-153	0
HIST1H4J	3.07e-121	3.88035	0.673	0.146	9.58e-118	0
SAC3D1	3.09e-18	3.7898	0.461	0.083	9.62e-15	0
TUBA1B	0	3.78749	0.981	0.226	0	0
SMC4	9.38e-142	3.7689	0.791	0.264	2.93e-138	0
HMGN2	7.84e-266	3.72689	0.959	0.329	2.45e-262	0
KIF15	9.35e-09	3.65528	0.489	0.095	2.91e-05	0
H2AFX	5.86e-147	3.63451	0.778	0.162	1.83e-143	0
HIST1H2AJ	0	3.61972	0.973	0.109	0	0
HIST1H2AM	4.94e-261	3.61438	0.886	0.146	1.54e-257	0
TMPO	9.68e-181	3.43545	0.832	0.237	3.02e-177	0
HIST1H2AI	3.63e-69	3.42883	0.627	0.058	1.13e-65	0
HMGB1	5.01e-276	3.34093	0.953	0.369	1.56e-272	0
CDKN2D	1.13e-18	3.33163	0.523	0.138	3.51e-15	0
CKS1B	9.79e-115	3.30241	0.747	0.17	3.05e-111	0
ANP32E	9.11e-116	3.29219	0.775	0.275	2.84e-112	0
CRIP1	2.72e-109	3.2595	0.768	0.382	8.49e-106	0
HMGB2	1.26e-261	3.22397	0.939	0.298	3.92e-258	0
HIST1H3G	8.97e-292	3.1874	0.913	0.107	2.8e-288	0
HMGB3	4.62e-50	3.13609	0.572	0.127	1.44e-46	0
HIST1H2BC	1.35e-59	3.08071	0.584	0.091	4.21e-56	0
KNL1	4.3e-45	3.02684	0.595	0.123	1.34e-41	0
NUSAP1	0	2.9643	0.949	0.202	0	0
MKI67	7.74e-258	2.87737	0.916	0.245	2.41e-254	0
H2AFZ	4.12e-243	2.83461	0.922	0.338	1.29e-239	0
SGO2	1.15e-69	2.71735	0.639	0.141	3.58e-66	0
H1FX	1.62e-35	2.70173	0.627	0.398	5.06e-32	0
HIST1H1B	0	2.69974	0.961	0.112	0	0
HIST1H2AG	5.67e-135	2.63775	0.676	0.093	1.77e-131	0
HIST1H2AL	5.02e-153	2.62983	0.729	0.076	1.57e-149	0
JPT1	1.57e-81	2.61389	0.695	0.299	4.89e-78	0
AC005674.2	7.13e-09	2.55851	0.316	0.084	2.22e-05	0
HIST1H1D	5.96e-278	2.55211	0.884	0.237	1.86e-274	0
RRM1	3.82e-07	2.489	0.437	0.125	0.00119028	0
HIST1H2AH	2.03e-245	2.43162	0.843	0.093	6.34e-242	0
CDCA8	1e-67	2.42536	0.648	0.127	3.12e-64	0
UBB	2.42e-58	2.4088	0.659	0.415	7.54e-55	0
H2AFV	2.09e-173	2.39822	0.848	0.375	6.52e-170	0
CLCN5	2.62e-10	2.35387	0.263	0.088	8.16e-07	0
AC007032.1	1.17e-18	2.33919	0.272	0.055	3.66e-15	0
AC009065.4	2.35e-22	2.33613	0.275	0.116	7.33e-19	0
CENPF	6.24e-270	2.31634	0.9	0.189	1.95e-266	0
CENPM	1.25e-17	2.30309	0.516	0.123	3.91e-14	0
CENPE	1.34e-137	2.22185	0.747	0.149	4.18e-134	0
ANP32B	1.21e-72	2.22054	0.7	0.366	3.79e-69	0
TUBB4B	7.64e-200	2.21596	0.842	0.235	2.38e-196	0
TOP2A	0	2.14502	0.951	0.162	0	0
TCTE3	2.14e-14	2.07339	0.287	0.078	6.68e-11	0
DEK	2.1e-60	2.04881	0.686	0.39	6.55e-57	0
PDE9A	2.94e-12	1.97948	0.295	0.066	9.16e-09	0
APOC2	1.57e-25	1.96403	0.291	0.117	4.9e-22	0
SLC1A5	5.42e-18	1.95594	0.258	0.177	1.69e-14	0
DLGAP5	2.59e-132	1.92182	0.757	0.138	8.09e-129	0
VIM	6.93e-192	1.91847	0.911	0.416	2.16e-188	0
HNRNPA3	7.25e-42	1.89684	0.651	0.418	2.26e-38	0
RAD21	9.24e-81	1.87273	0.71	0.3	2.88e-77	0
SMC2	1.65e-32	1.80152	0.591	0.19	5.15e-29	0
CKAP2L	4.38e-25	1.79072	0.529	0.103	1.37e-21	0
CYSLTR2	2.49e-10	1.79038	0.333	0.104	7.76e-07	0
ZFP36L1	2.42e-08	1.78874	0.356	0.224	7.55e-05	0
HMMR	3.12e-35	1.78127	0.553	0.111	9.74e-32	0
NUCKS1	9.25e-104	1.77174	0.757	0.294	2.88e-100	0
SIVA1	5.62e-13	1.71689	0.537	0.236	1.75e-09	0
HSD17B1	7.92e-06	1.69625	0.256	0.062	0.0247038	0
POMT2	1.06e-16	1.62531	0.305	0.103	3.3e-13	0
ZKSCAN7	1.88e-07	1.61807	0.306	0.097	0.000584737	0
BIRC5	2.6e-50	1.58911	0.615	0.13	8.11e-47	0
EZH2	9.35e-06	1.47371	0.501	0.172	0.0291505	0
AL139274.2	7.6e-07	1.4661	0.342	0.131	0.0023696	0
KIF22	2.36e-11	1.44554	0.535	0.148	7.34e-08	0
KIF20B	5.07e-55	1.43784	0.644	0.192	1.58e-51	0
CCNB2	2.35e-29	1.42353	0.558	0.124	7.34e-26	0
HIST1H2AC	5.9e-09	1.41754	0.404	0.133	1.84e-05	0
HP1BP3	4.25e-87	1.33857	0.719	0.384	1.33e-83	0
SDF2L1	9.4e-08	1.32607	0.352	0.256	0.000292995	0
HNRNPA2B1	9.45e-99	1.32101	0.797	0.421	2.95e-95	0
S100A10	1.17e-16	1.31131	0.523	0.369	3.64e-13	0
RGCC	4.29e-10	1.30327	0.368	0.261	1.34e-06	0
TUBA4A	3.38e-28	1.29141	0.592	0.282	1.05e-24	0
LRRC29	7e-16	1.26697	0.292	0.064	2.18e-12	0
PTMA	2.51e-189	1.25189	0.906	0.372	7.83e-186	0
ACTB	1.3e-68	1.16333	0.775	0.47	4.05e-65	0
CALM2	2.48e-144	1.15794	0.801	0.381	7.74e-141	0
AL391069.2	2.23e-25	1.10082	0.252	0.058	6.95e-22	0
AC211476.2	3.88e-24	1.09396	0.27	0.098	1.21e-20	0
LINC01431	2.12e-14	1.07724	0.253	0.147	6.61e-11	0
CEP55	6.35e-34	1.0756	0.587	0.133	1.98e-30	0
TPX2	3.87e-138	1.07356	0.753	0.173	1.21e-134	0
CCNA2	4.93e-19	1.06954	0.543	0.116	1.54e-15	0
ITM2A	2.48e-43	1.04785	0.635	0.377	7.72e-40	0
NUF2	3.88e-13	1.00514	0.478	0.101	1.21e-09	0
LINC00894	1.22e-15	0.983876	0.267	0.055	3.81e-12	0
RAN	1.65e-50	0.939039	0.696	0.413	5.14e-47	0
AC092650.1	1.91e-19	0.917521	0.273	0.126	5.94e-16	0
ALYREF	4.07e-09	0.902248	0.534	0.285	1.27e-05	0
KPNA2	5.13e-53	0.893405	0.623	0.14	1.6e-49	0
AL627171.2	3.42e-11	0.844193	0.341	0.307	1.07e-07	0
AURKA	3.29e-10	0.821613	0.437	0.088	1.03e-06	0
TESC	1.75e-13	0.813462	0.322	0.289	5.47e-10	0
CENPA	1.01e-06	0.808047	0.497	0.099	0.00315749	0
EOMES	1.16e-19	0.807382	0.291	0.205	3.62e-16	0
IQCK	7.99e-25	0.759626	0.256	0.086	2.49e-21	0
THBS4	2.64e-16	0.747627	0.294	0.069	8.24e-13	0
ASPM	4.65e-168	0.736958	0.787	0.15	1.45e-164	0
RCBTB2	1.11e-24	0.711463	0.267	0.245	3.47e-21	0
STARD7-AS1	1.03e-09	0.692155	0.3	0.055	3.22e-06	0
UBE2C	2.81e-181	0.674489	0.81	0.126	8.75e-178	0
DCTN3	7.58e-13	0.603172	0.57	0.345	2.36e-09	0
UBE2S	1.22e-131	0.565665	0.77	0.232	3.8e-128	0
SRSF7	2.78e-10	0.551312	0.568	0.317	8.67e-07	0
GAPDH	1.21e-19	0.535427	0.67	0.511	3.78e-16	0
SLC3A2	7.83e-22	0.514453	0.29	0.202	2.44e-18	0
SFPQ	1.13e-24	0.511309	0.613	0.371	3.52e-21	0
PPIA	7.85e-34	0.502119	0.647	0.448	2.45e-30	0
MIF	9.71e-06	0.450655	0.495	0.447	0.0302882	0
PFN1	5.54e-34	0.443374	0.649	0.466	1.73e-30	0
AC103810.2	6.4e-21	0.439647	0.261	0.102	2e-17	0
FLNA	4.92e-08	0.368657	0.372	0.301	0.000153316	0
PKMYT1	3.61e-24	0.360069	0.265	0.075	1.13e-20	0
TYMS	5.49e-84	0.355668	0.69	0.185	1.71e-80	0
PLAC8	8.06e-09	0.35113	0.278	0.084	2.51e-05	0
S100A6	1.37e-29	0.338155	0.239	0.404	4.27e-26	0
RRM2	1.2e-96	0.334022	0.723	0.14	3.73e-93	0
TBC1D10C	9.16e-27	0.310556	0.295	0.274	2.85e-23	0
CDKN2A	9.71e-13	0.288643	0.324	0.172	3.03e-09	0
RPS27L	2.06e-07	0.26923	0.475	0.409	0.000643067	0
MT-CO3	4e-10	0.263871	0.577	0.482	1.25e-06	0
ENO1	1.7e-06	0.263006	0.559	0.469	0.00530701	0
F2R	8.14e-14	-0.253601	0.337	0.263	2.54e-10	0
PTTG1	1.63e-98	-0.267947	0.753	0.306	5.07e-95	0
TAB2	9.01e-23	-0.269395	0.257	0.177	2.81e-19	0
PRC1	3.65e-17	-0.277504	0.538	0.137	1.14e-13	0
GSTP1	4.92e-06	-0.302647	0.527	0.438	0.0153442	0
CKAP2	4.69e-52	-0.32853	0.628	0.196	1.46e-48	0
M6PR	7.48e-07	-0.345665	0.33	0.257	0.00233342	0
TRAT1	6.76e-07	-0.358816	0.276	0.198	0.00210699	0
FDFT1	2.26e-08	-0.381064	0.299	0.249	7.04e-05	0
DSTN	8.59e-11	-0.404513	0.366	0.303	2.68e-07	0
HSPA8	5.78e-06	-0.411841	0.487	0.437	0.0180277	0
RGS10	1.64e-09	-0.426123	0.362	0.429	5.1e-06	0
S1PR4	1.45e-09	-0.439015	0.329	0.333	4.51e-06	0
PCLAF	3.15e-54	-0.449123	0.654	0.192	9.81e-51	0
ANXA4	6.72e-16	-0.450601	0.313	0.279	2.1e-12	0
TPT1	6.37e-13	-0.461421	0.313	0.431	1.99e-09	0
AKAP9	2.81e-10	-0.506753	0.375	0.296	8.77e-07	0
KLF2	6.5e-18	-0.507067	0.275	0.185	2.03e-14	0
TNFRSF1B	7.49e-23	-0.517275	0.277	0.279	2.33e-19	0
CENPU	6.05e-06	-0.531991	0.452	0.151	0.0188744	0
HOPX	4.67e-07	-0.544355	0.414	0.512	0.00145651	0
NPC2	3.72e-36	-0.560334	0.287	0.241	1.16e-32	0
RBPJ	1.67e-13	-0.567264	0.327	0.275	5.21e-10	0
RPS18	5.96e-09	-0.616443	0.39	0.494	1.86e-05	0
GNLY	1.94e-20	-0.624298	0.311	0.401	6.06e-17	0
CANX	3.39e-07	-0.654661	0.395	0.354	0.00105854	0
MACF1	5.67e-06	-0.664251	0.395	0.281	0.0176732	0
B2M	4.75e-23	-0.673597	0.227	0.398	1.48e-19	0
GAS5	1.73e-29	-0.673709	0.289	0.287	5.39e-26	0
RPS28	6.99e-23	-0.696733	0.235	0.398	2.18e-19	0
FYB1	2.24e-12	-0.697346	0.372	0.422	6.98e-09	0
C19orf53	4.26e-07	-0.701224	0.399	0.378	0.001329	0
NCF4	3.72e-16	-0.710618	0.308	0.291	1.16e-12	0
AC106791.1	1.57e-05	-0.716548	0.254	0.137	0.0488579	0
SELPLG	9.89e-16	-0.72212	0.297	0.329	3.08e-12	0
EEF2	5.31e-18	-0.733361	0.31	0.411	1.66e-14	0
EEF1A1	1.77e-08	-0.743539	0.314	0.436	5.53e-05	0
GYPC	8.04e-06	-0.759939	0.372	0.298	0.0250706	0
PTGER2	6.33e-08	-0.772369	0.261	0.202	0.000197267	0
ARL6IP1	7.82e-146	-0.792272	0.765	0.301	2.44e-142	0
SLC5A3	3.92e-16	-0.79814	0.281	0.241	1.22e-12	0
RHOC	1.11e-28	-0.801936	0.315	0.404	3.46e-25	0
ARID5B	2.27e-12	-0.81439	0.303	0.224	7.09e-09	0
HLA-DQB1	2.25e-30	-0.821385	0.259	0.247	7.01e-27	0
TLE5	2.44e-16	-0.832204	0.325	0.403	7.6e-13	0
HLA-DMA	2.06e-08	-0.834299	0.391	0.355	6.42e-05	0
CYTIP	6.57e-34	-0.840689	0.297	0.302	2.05e-30	0
SRGN	5.26e-17	-0.842949	0.278	0.415	1.64e-13	0
UCP2	9.1e-08	-0.867495	0.349	0.343	0.000283846	0
RPS19	9.76e-09	-0.882677	0.372	0.467	3.04e-05	0
CSTB	3.94e-08	-0.883388	0.313	0.39	0.00012272	0
CD3G	1.14e-08	-0.892869	0.351	0.469	3.54e-05	0
RPL10	5.29e-26	-0.894517	0.261	0.435	1.65e-22	0
TGFB1	6.8e-21	-0.902207	0.276	0.305	2.12e-17	0
PTPRC	1.57e-06	-0.904903	0.353	0.414	0.00490484	0
ITGAL	8.72e-08	-0.910825	0.375	0.352	0.000271881	0
MDM2	7.82e-07	-0.915101	0.363	0.21	0.00243797	0
LAT	2.89e-27	-0.925899	0.282	0.345	9e-24	0
CUTA	9.04e-29	-0.927038	0.262	0.349	2.82e-25	0
TC2N	2.44e-09	-0.934948	0.382	0.387	7.62e-06	0
GOLGB1	1.24e-10	-0.94323	0.384	0.341	3.87e-07	0
CKLF	6.06e-08	-0.945718	0.357	0.448	0.000188948	0
SNAP47	4.92e-12	-0.949665	0.261	0.289	1.53e-08	0
BIN2	1.64e-15	-0.950031	0.315	0.271	5.1e-12	0
NME2	2.2e-24	-0.956817	0.313	0.419	6.85e-21	0
RPL12	6.88e-26	-0.979683	0.303	0.462	2.15e-22	0
TAGLN2	2.42e-08	-0.982974	0.538	0.435	7.54e-05	0
PPIB	4.08e-16	-0.985166	0.304	0.446	1.27e-12	0
ITGA1	4.1e-28	-0.986795	0.265	0.245	1.28e-24	0
AC243960.1	3.1e-18	-1.00156	0.303	0.252	9.68e-15	0
DDX5	1.04e-08	-1.0037	0.324	0.436	3.24e-05	0
COTL1	6.23e-09	-1.01007	0.329	0.437	1.94e-05	0
SH3BGRL3	2.45e-39	-1.01733	0.262	0.464	7.65e-36	0
GSTK1	1.31e-18	-1.01824	0.247	0.379	4.08e-15	0
PCED1B-AS1	1.11e-06	-1.02184	0.387	0.386	0.00347219	0
TAP1	3.95e-29	-1.026	0.305	0.224	1.23e-25	0
YPEL3	2.27e-18	-1.034	0.297	0.363	7.09e-15	0
ATP6V1G1	9.08e-38	-1.04175	0.243	0.401	2.83e-34	0
LIMD2	5.3e-22	-1.06285	0.276	0.435	1.65e-18	0
OPTN	3.05e-11	-1.08332	0.372	0.364	9.5e-08	0
CD59	7.56e-07	-1.08514	0.349	0.234	0.00235866	0
STK17B	8.11e-08	-1.09006	0.329	0.431	0.000252925	0
CD247	5.85e-16	-1.09433	0.287	0.281	1.82e-12	0
EVL	2.96e-22	-1.10333	0.296	0.422	9.23e-19	0
XRN2	3.42e-13	-1.10653	0.314	0.271	1.07e-09	0
AHNAK	9.65e-06	-1.10977	0.339	0.408	0.030077	0
SYF2	4.78e-18	-1.11166	0.333	0.351	1.49e-14	0
IFITM2	1.24e-11	-1.11442	0.322	0.41	3.87e-08	0
CD53	7.26e-26	-1.11924	0.289	0.438	2.26e-22	0
EIF4A1	3.95e-15	-1.11961	0.329	0.416	1.23e-11	0
CXCR3	1.26e-10	-1.16262	0.373	0.423	3.93e-07	0
CTSD	3.82e-21	-1.17117	0.315	0.4	1.19e-17	0
CMTM3	8.49e-37	-1.17608	0.239	0.287	2.65e-33	0
GPSM3	9.25e-19	-1.17667	0.281	0.414	2.88e-15	0
SLC4A7	6.36e-21	-1.19594	0.31	0.277	1.98e-17	0
CD37	4.08e-26	-1.20691	0.275	0.402	1.27e-22	0
REEP5	1.14e-11	-1.20697	0.329	0.379	3.55e-08	0
MYO1F	1.56e-13	-1.21515	0.303	0.26	4.86e-10	0
UBXN11	5.44e-16	-1.21967	0.32	0.234	1.7e-12	0
SAMHD1	2.69e-33	-1.22525	0.251	0.211	8.4e-30	0
RBBP4	4.26e-26	-1.23445	0.365	0.335	1.33e-22	0
HLA-DRB5	6.93e-08	-1.24336	0.376	0.341	0.000216182	0
CXCR4	3.98e-07	-1.24958	0.518	0.286	0.00124009	0
CTSC	4.62e-30	-1.25594	0.256	0.463	1.44e-26	0
CD63	3.6e-15	-1.26492	0.342	0.473	1.12e-11	0
PTPRCAP	1.91e-28	-1.26687	0.243	0.432	5.97e-25	0
ITM2B	9.9e-15	-1.27814	0.304	0.446	3.09e-11	0
GLO1	8.24e-24	-1.28517	0.251	0.423	2.57e-20	0
BST2	1.25e-25	-1.28637	0.296	0.428	3.89e-22	0
CLDND1	1.55e-20	-1.29227	0.316	0.432	4.83e-17	0
RSRP1	2.3e-42	-1.29777	0.281	0.302	7.16e-39	0
FTL	1.4e-31	-1.33123	0.215	0.371	4.37e-28	0
ITGB2	6.19e-07	-1.33569	0.323	0.324	0.00192886	0
FOS	2.7e-30	-1.34224	0.248	0.349	8.41e-27	0
ARAP2	1.37e-12	-1.34972	0.292	0.27	4.28e-09	0
NCR3	2.61e-25	-1.35554	0.271	0.305	8.14e-22	0
TIMP1	1.12e-07	-1.35672	0.257	0.328	0.000348673	0
RIPOR2	7.93e-07	-1.36989	0.263	0.209	0.00247371	0
CD2	2.87e-26	-1.36997	0.278	0.46	8.95e-23	0
MAP1LC3B	1.38e-22	-1.37416	0.278	0.395	4.3e-19	0
ELF1	1.32e-16	-1.37597	0.377	0.328	4.11e-13	0
MMP24OS	1.01e-23	-1.38098	0.286	0.253	3.14e-20	0
FEN1	1.01e-06	-1.39035	0.301	0.117	0.00314268	0
APRT	2.47e-43	-1.39598	0.237	0.335	7.69e-40	0
TMEM173	2.07e-49	-1.40285	0.247	0.251	6.46e-46	0
CD8B	4.26e-08	-1.40522	0.42	0.462	0.000132836	0
MCL1	1.19e-13	-1.42614	0.308	0.299	3.7e-10	0
LINC00892	1.05e-08	-1.44295	0.286	0.283	3.29e-05	0
SLFN5	2.32e-55	-1.45939	0.228	0.32	7.22e-52	0
PMAIP1	4.54e-18	-1.47671	0.259	0.156	1.42e-14	0
EIF3J	1.68e-21	-1.49259	0.261	0.25	5.25e-18	0
CD48	1.87e-17	-1.50903	0.337	0.378	5.84e-14	0
PLAAT4	4.22e-28	-1.55106	0.306	0.495	1.32e-24	0
HCST	4.85e-38	-1.56464	0.253	0.478	1.51e-34	0
VPS13C	9e-16	-1.58056	0.309	0.297	2.81e-12	0
PRKCQ-AS1	2.46e-41	-1.59226	0.22	0.26	7.66e-38	0
IL10RA	1.2e-36	-1.59748	0.248	0.29	3.74e-33	0
LINC01871	2.94e-31	-1.62564	0.243	0.422	9.18e-28	0
ICAM3	2.57e-24	-1.635	0.268	0.277	8.02e-21	0
C4orf48	3.05e-57	-1.69754	0.208	0.306	9.5e-54	0
GBP2	1.79e-54	-1.70567	0.273	0.314	5.59e-51	0
PDCD4	2.56e-36	-1.71393	0.27	0.305	7.98e-33	0
IL32	3.4e-57	-1.75646	0.139	0.374	1.06e-53	0
PNRC1	5.15e-22	-1.76641	0.254	0.426	1.6e-18	0
DUT	4.95e-09	-1.77005	0.552	0.295	1.54e-05	0
IFNG	2.23e-09	-1.77522	0.337	0.258	6.95e-06	0
UTRN	2.01e-16	-1.77785	0.263	0.259	6.28e-13	0
GBP5	2.99e-19	-1.83919	0.275	0.263	9.32e-16	0
SERPINB1	5.02e-16	-1.85051	0.327	0.354	1.57e-12	0
IL2RB	8.35e-50	-1.90162	0.243	0.27	2.6e-46	0
ALOX5AP	1.66e-50	-1.90276	0.256	0.482	5.19e-47	0
GLIPR1	2.58e-35	-1.90502	0.281	0.348	8.04e-32	0
SLAMF7	4.83e-19	-1.91281	0.272	0.238	1.5e-15	0
XBP1	9.53e-10	-1.94786	0.284	0.264	2.97e-06	0
APOBEC3G	2.06e-27	-1.95561	0.281	0.357	6.42e-24	0
GIMAP7	1.92e-17	-1.98053	0.309	0.242	6e-14	0
SAT1	6.55e-19	-1.99819	0.319	0.363	2.04e-15	0
CCND2	3.36e-122	-2.00019	0.157	0.291	1.05e-118	0
HMOX2	2.14e-30	-2.02309	0.182	0.255	6.68e-27	0
CCL3	2.77e-28	-2.03102	0.286	0.303	8.62e-25	0
PRF1	1.63e-40	-2.04289	0.315	0.51	5.07e-37	0
DDX24	8.35e-35	-2.06683	0.284	0.295	2.6e-31	0
TRAC	1.31e-08	-2.09563	0.382	0.343	4.1e-05	0
PPP2R5C	2.46e-30	-2.13163	0.32	0.296	7.69e-27	0
STAT1	6.31e-10	-2.17662	0.289	0.214	1.97e-06	0
RPL22L1	5.71e-08	-2.17772	0.281	0.229	0.000178006	0
RDH10	1.66e-18	-2.18052	0.3	0.326	5.16e-15	0
CST7	1.42e-40	-2.21868	0.271	0.493	4.44e-37	0
SYTL3	9.81e-30	-2.2285	0.266	0.288	3.06e-26	0
PTPN22	4.41e-14	-2.23131	0.376	0.368	1.38e-10	0
TFRC	2.95e-14	-2.27168	0.282	0.182	9.19e-11	0
ZFAS1	5.98e-23	-2.3655	0.316	0.354	1.86e-19	0
GZMM	1.2e-27	-2.50965	0.184	0.259	3.74e-24	0
RABGAP1L	3.92e-14	-2.5197	0.289	0.234	1.22e-10	0
JUNB	7.03e-47	-2.53481	0.185	0.258	2.19e-43	0
SAMD9	1.41e-28	-2.53694	0.254	0.252	4.39e-25	0
IL16	3.67e-18	-2.53753	0.329	0.32	1.15e-14	0
JAML	1.62e-76	-2.59607	0.243	0.342	5.04e-73	0
CD52	3.11e-59	-2.60617	0.156	0.353	9.7e-56	0
LRRN3	5.69e-20	-2.61647	0.256	0.283	1.77e-16	0
HSP90AB1	4.97e-41	-2.67673	0.261	0.431	1.55e-37	0
GIMAP4	1.74e-47	-2.7254	0.22	0.267	5.41e-44	0
NEAT1	3.41e-37	-2.80647	0.232	0.278	1.06e-33	0
TCF25	3.05e-17	-2.8093	0.287	0.292	9.52e-14	0
GNPTAB	1.38e-35	-2.85508	0.265	0.252	4.29e-32	0
RNF213	2.8e-21	-2.87489	0.289	0.434	8.72e-18	0
ABI3	1.39e-05	-2.94535	0.273	0.209	0.0433811	0
GZMH	7.96e-14	-2.97509	0.303	0.31	2.48e-10	0
BATF	6.18e-33	-2.98466	0.258	0.228	1.93e-29	0
LGALS3	2.46e-24	-2.99728	0.238	0.272	7.67e-21	0
FAM3C	1.71e-12	-3.03332	0.272	0.222	5.32e-09	0
ZFP36	7.22e-29	-3.04376	0.256	0.326	2.25e-25	0
ATOX1	7.6e-30	-3.13042	0.251	0.214	2.37e-26	0
CLEC2B	5.49e-15	-3.17649	0.391	0.432	1.71e-11	0
ZNF831	9.46e-08	-3.26728	0.311	0.181	0.00029495	0
HSPA5	4.17e-08	-3.2802	0.375	0.414	0.000130084	0
LPAR6	3.54e-36	-3.31405	0.242	0.371	1.1e-32	0
IRF1	8.32e-19	-3.35342	0.297	0.302	2.59e-15	0
RSRC2	1.28e-34	-3.39846	0.294	0.244	3.98e-31	0
CD7	3.78e-16	-3.46735	0.346	0.414	1.18e-12	0
RGS1	3.64e-28	-3.46987	0.272	0.255	1.14e-24	0
SH2D2A	4.07e-21	-3.53058	0.319	0.295	1.27e-17	0
IER2	7.48e-23	-4.31984	0.197	0.264	2.33e-19	0
PLIN2	5.31e-32	-4.72741	0.256	0.337	1.66e-28	0
CD69	9.94e-23	-4.78595	0.277	0.394	3.1e-19	0
LTB	1.32e-45	-5.10785	0.128	0.301	4.13e-42	0
NKG7	2.9e-23	-5.24635	0.414	0.561	9.05e-20	0
CCL5	2.79e-118	-6.38743	0.163	0.553	8.7e-115	0
TXNIP	4.04e-26	-6.62318	0.2	0.347	1.26e-22	0
SQSTM1	2.57e-64	-8.4978	0.114	0.338	8.03e-61	0
DENND2D	4.44e-26	3.15849	0.257	0.189	1.38e-22	1
GADD45GIP1	6.94e-14	2.77016	0.284	0.226	2.16e-10	1
MXD4	3.64e-10	2.74966	0.255	0.206	1.13e-06	1
NCR3	7.79e-10	2.27631	0.34	0.294	2.43e-06	1
PPAN	5.75e-36	2.09521	0.259	0.12	1.79e-32	1
ASB2	3.11e-14	2.00816	0.288	0.214	9.69e-11	1
GZMB	4.8e-25	1.94592	0.672	0.495	1.5e-21	1
CD74	2.54e-71	1.93721	0.704	0.404	7.91e-68	1
ATP10D	1.27e-20	1.82148	0.31	0.212	3.95e-17	1
B4GAT1	1.54e-49	1.73742	0.322	0.132	4.79e-46	1
BAG6	1.56e-51	1.72385	0.31	0.145	4.87e-48	1
HLA-DRB5	1.98e-12	1.71996	0.424	0.334	6.17e-09	1
CD68	3.88e-16	1.64908	0.254	0.175	1.21e-12	1
HLA-DRB1	7.13e-24	1.64785	0.561	0.385	2.22e-20	1
VPS18	3.02e-27	1.62633	0.262	0.147	9.42e-24	1
ABHD15	9.36e-38	1.56398	0.273	0.149	2.92e-34	1
RPS2	2.51e-34	1.47736	0.621	0.411	7.82e-31	1
HLA-DRA	1.87e-12	1.47549	0.531	0.409	5.83e-09	1
RPL12	1.92e-77	1.45675	0.709	0.397	5.97e-74	1
BCAR3	6.76e-66	1.45008	0.299	0.114	2.11e-62	1
APOBEC3G	4.84e-15	1.43096	0.412	0.336	1.51e-11	1
SLC45A4	1.83e-59	1.41367	0.255	0.105	5.71e-56	1
CITED2	5.18e-15	1.39395	0.276	0.237	1.62e-11	1
THAP2	5.24e-23	1.38625	0.251	0.136	1.63e-19	1
LMNA	3.97e-08	1.37423	0.299	0.282	0.000123725	1
KLC4	1.93e-40	1.37398	0.278	0.158	6.03e-37	1
ALOX5AP	1.17e-20	1.26742	0.579	0.43	3.66e-17	1
LINC02132	3.06e-43	1.23591	0.258	0.117	9.54e-40	1
FBXW9	4.1e-19	1.23072	0.266	0.148	1.28e-15	1
RPL10	5.63e-79	1.22099	0.693	0.367	1.76e-75	1
AP002807.1	2.32e-44	1.2089	0.309	0.156	7.24e-41	1
RPS18	8.04e-51	1.18604	0.693	0.446	2.51e-47	1
FAM219A	7.1e-23	1.17219	0.262	0.142	2.21e-19	1
LAG3	1.41e-11	1.07018	0.427	0.353	4.4e-08	1
CTSW	2.04e-30	1.06896	0.656	0.45	6.36e-27	1
AL031963.3	3.39e-40	1.02691	0.3	0.156	1.06e-36	1
EEF1A1	5.72e-47	0.997493	0.623	0.387	1.78e-43	1
SNAI3	8.26e-52	0.993464	0.251	0.122	2.58e-48	1
CUTA	1.01e-05	0.95015	0.39	0.328	0.0314205	1
CCRL2	8.14e-16	0.947433	0.25	0.178	2.54e-12	1
HLA-DQA1	4.28e-13	0.947368	0.505	0.394	1.34e-09	1
HLA-DPA1	7.22e-06	0.928441	0.539	0.434	0.0225214	1
HLA-DQB1	1.12e-08	0.922859	0.289	0.243	3.5e-05	1
RPLP0	2.15e-42	0.918632	0.66	0.434	6.71e-39	1
HCST	1.98e-21	0.903923	0.605	0.421	6.17e-18	1
CD48	1.21e-11	0.897349	0.414	0.366	3.76e-08	1
RPS28	1.48e-42	0.880571	0.571	0.344	4.62e-39	1
LINC00892	1.18e-08	0.813469	0.351	0.273	3.67e-05	1
AC008969.1	9.6e-42	0.803835	0.269	0.114	2.99e-38	1
PPIB	2.32e-12	0.765382	0.538	0.408	7.23e-09	1
MINDY1	5.4e-21	0.748788	0.27	0.192	1.68e-17	1
LAT	4.55e-13	0.725931	0.381	0.329	1.42e-09	1
CCND2	6.38e-15	0.719638	0.278	0.271	1.99e-11	1
COTL1	7.7e-09	0.715049	0.517	0.406	2.4e-05	1
NME2	1.15e-15	0.702317	0.512	0.387	3.58e-12	1
HLA-DPB1	7.85e-20	0.669439	0.534	0.381	2.45e-16	1
GZMH	1.14e-17	0.665196	0.38	0.298	3.57e-14	1
PRF1	7.49e-09	0.65664	0.564	0.47	2.34e-05	1
GAPDH	2.73e-28	0.634317	0.702	0.508	8.52e-25	1
SH3BGRL3	1.11e-29	0.631854	0.594	0.41	3.47e-26	1
EEF2	1.31e-08	0.625568	0.477	0.384	4.09e-05	1
TIMP1	9.17e-08	0.61873	0.384	0.308	0.00028583	1
REEP5	1.66e-06	0.602916	0.398	0.368	0.00517949	1
NCF4	9.56e-06	0.585277	0.321	0.289	0.0298051	1
C12orf60	2.74e-58	0.57284	0.27	0.082	8.55e-55	1
CMTM3	7.28e-07	0.56942	0.277	0.28	0.00227002	1
CD37	2.54e-07	0.558404	0.446	0.374	0.000790963	1
SNHG29	9.64e-08	0.546215	0.45	0.388	0.00030043	1
RPS4Y1	1.53e-12	0.54569	0.531	0.406	4.78e-09	1
SIDT1	2.6e-42	0.538112	0.276	0.153	8.12e-39	1
ANKRD12	7.17e-06	0.521043	0.305	0.403	0.0223674	1
CD99	8.37e-15	0.518942	0.605	0.468	2.61e-11	1
S100A4	9e-31	0.474014	0.525	0.334	2.8e-27	1
MMP24OS	3.96e-09	0.404957	0.254	0.258	1.23e-05	1
LIMD2	8.24e-06	0.401373	0.497	0.399	0.0257066	1
GPSM3	7.79e-06	0.401152	0.44	0.388	0.0242888	1
PFN1	6.69e-09	0.397514	0.583	0.479	2.09e-05	1
FXYD5	1.24e-05	0.378889	0.44	0.365	0.0386379	1
RPS19	6.7e-24	0.35141	0.613	0.428	2.09e-20	1
IL32	4.56e-13	0.309235	0.412	0.329	1.42e-09	1
DDIT4	1.04e-13	0.292143	0.255	0.211	3.25e-10	1
GSTP1	1.33e-08	0.267698	0.523	0.44	4.16e-05	1
PEG10	1.34e-36	0.258848	0.278	0.138	4.17e-33	1
RHOC	2.51e-06	0.257613	0.427	0.386	0.00783321	1
TBC1D10C	2.2e-08	0.255364	0.295	0.275	6.87e-05	1
COL18A1	6.4e-59	-0.290042	0.272	0.115	1.99e-55	1
SLC4A7	4e-09	-0.335822	0.259	0.286	1.25e-05	1
CST7	6.23e-08	-0.422981	0.529	0.45	0.00019418	1
ETS1	9.94e-11	-0.430516	0.31	0.427	3.1e-07	1
ACTB	2.13e-16	-0.474519	0.632	0.496	6.65e-13	1
LINC02611	3.95e-16	-0.491365	0.25	0.173	1.23e-12	1
HSD11B1L	5.09e-49	-0.584013	0.251	0.101	1.59e-45	1
SFPQ	5.49e-08	-0.615572	0.31	0.421	0.000171271	1
SND1-IT1	2.38e-11	-0.66335	0.278	0.219	7.41e-08	1
PRKCQ-AS1	2.69e-06	-0.704159	0.255	0.254	0.00837872	1
HNRNPA3	9.71e-09	-0.777955	0.368	0.465	3.03e-05	1
MYDGF	1.24e-06	-0.783053	0.326	0.291	0.00387183	1
GAS5	4.32e-06	-0.805431	0.258	0.292	0.0134786	1
PTPRC	1.03e-05	-0.95698	0.358	0.413	0.0320526	1
CEBPD	3.86e-08	-0.981703	0.307	0.253	0.000120388	1
RAN	6.68e-12	-1.00285	0.344	0.471	2.08e-08	1
MTMR8	1.09e-23	-1.02107	0.267	0.159	3.41e-20	1
CD7	1.95e-07	-1.09105	0.475	0.393	0.00060684	1
UTRN	2.94e-09	-1.09295	0.235	0.264	9.16e-06	1
IL16	2.31e-07	-1.0936	0.333	0.32	0.000719545	1
AC114271.1	1.77e-44	-1.2197	0.302	0.159	5.52e-41	1
NKG7	5.73e-13	-1.30597	0.668	0.52	1.79e-09	1
GZMA	1.41e-14	-1.35947	0.65	0.515	4.39e-11	1
HSP90AA1	1.58e-14	-1.45947	0.353	0.474	4.93e-11	1
HNRNPA2B1	4.21e-24	-1.46198	0.31	0.501	1.31e-20	1
GLE1	9.5e-29	-1.50853	0.258	0.13	2.96e-25	1
BTG1	2.33e-09	-1.59407	0.265	0.38	7.27e-06	1
S100A6	2.22e-21	-1.62466	0.528	0.357	6.92e-18	1
CCL5	1.57e-11	-1.64663	0.588	0.482	4.89e-08	1
ANP32B	1.04e-19	-1.66829	0.306	0.43	3.26e-16	1
HP1BP3	1.22e-26	-1.80443	0.259	0.459	3.82e-23	1
PROK2	7.64e-44	-1.83735	0.267	0.138	2.38e-40	1
SYTL3	9.34e-07	-1.8379	0.272	0.287	0.00291189	1
JAML	4.26e-20	-1.98015	0.388	0.318	1.33e-16	1
DEK	8.76e-15	-2.29013	0.296	0.454	2.73e-11	1
JPT1	2.71e-09	-2.35062	0.239	0.374	8.46e-06	1
ANP32E	2.48e-15	-2.52135	0.154	0.377	7.74e-12	1
H2AFV	3.78e-18	-2.55511	0.291	0.467	1.18e-14	1
CALM2	4.03e-26	-2.6031	0.291	0.465	1.26e-22	1
CRIP1	8.3e-09	-3.07326	0.354	0.451	2.59e-05	1
RAD21	2.49e-30	-3.08388	0.171	0.388	7.77e-27	1
SYNE2	1.27e-09	-3.60263	0.16	0.355	3.95e-06	1
UBALD2	1.54e-05	-3.65015	0.258	0.371	0.0479115	1
SMC4	1.01e-24	-3.65576	0.143	0.371	3.16e-21	1
NUCKS1	2.19e-11	-3.70044	0.185	0.387	6.83e-08	1
TMPO	6.45e-21	-4.10606	0.145	0.35	2.01e-17	1
HMGB1	4.31e-49	-4.10802	0.228	0.488	1.34e-45	1
CKAP2	1.56e-07	-4.15832	0.108	0.281	0.000487356	1
PTMA	1.52e-12	-4.258	0.314	0.47	4.73e-09	1
CKS1B	1.86e-08	-4.58631	0.055	0.284	5.79e-05	1
H2AFX	1.48e-17	-4.69279	0.06	0.28	4.61e-14	1
KIF20B	2.55e-09	-4.80092	0.075	0.285	7.94e-06	1
DUT	4.65e-09	-4.81994	0.235	0.348	1.45e-05	1
MALAT1	2.17e-80	-4.87832	0.107	0.428	6.75e-77	1
AL627171.2	1.91e-08	-4.8897	0.198	0.329	5.97e-05	1
HMGN2	1.11e-27	-5.04261	0.246	0.447	3.45e-24	1
H2AFZ	4.45e-35	-5.18545	0.203	0.456	1.39e-31	1
PTTG1	9.6e-11	-5.32381	0.236	0.392	2.99e-07	1
UBE2S	8.14e-31	-5.37651	0.089	0.344	2.54e-27	1
CENPE	2.72e-19	-5.51986	0.036	0.266	8.48e-16	1
CKS2	1.98e-12	-5.89671	0.112	0.312	6.17e-09	1
PCLAF	1.4e-11	-6.12648	0.104	0.283	4.37e-08	1
HIST2H2AC	7.06e-07	-6.23062	0.17	0.335	0.00220104	1
HMGB2	3.47e-52	-6.25438	0.11	0.434	1.08e-48	1
TPX2	1.72e-23	-6.38004	0.032	0.292	5.37e-20	1
TUBB4B	4.66e-40	-6.62741	0.112	0.355	1.45e-36	1
TYMS	9.17e-13	-6.67331	0.108	0.281	2.86e-09	1
DLGAP5	2.66e-15	-6.87115	0.012	0.26	8.3e-12	1
HIST1H1C	4.25e-15	-6.88154	0.21	0.376	1.32e-11	1
TUBA1C	3.06e-13	-6.9988	0.112	0.295	9.55e-10	1
RRM2	3.31e-13	-7.72734	0.023	0.255	1.03e-09	1
HIST1H4C	2.75e-39	-7.73485	0.03	0.283	8.57e-36	1
NUSAP1	6.24e-54	-7.93389	0.044	0.351	1.95e-50	1
STMN1	1.64e-36	-8.05818	0.14	0.403	5.11e-33	1
UBE2C	3.78e-21	-8.22654	0.012	0.257	1.18e-17	1
CENPF	6.97e-22	-8.32405	0.058	0.328	2.17e-18	1
TUBB	1.71e-44	-8.37548	0.103	0.364	5.33e-41	1
ARL6IP1	1.07e-31	-8.53767	0.177	0.397	3.33e-28	1
HIST1H1E	2.84e-07	-8.68145	0.196	0.36	0.000884182	1
HIST1H2AM	4.98e-16	-8.70096	0.063	0.282	1.55e-12	1
ASPM	5.44e-18	-8.83271	0.021	0.276	1.7e-14	1
HIST1H3D	7.97e-17	-8.95779	0.029	0.267	2.49e-13	1
MKI67	7.02e-37	-9.07258	0.084	0.381	2.19e-33	1
HIST1H1D	5.98e-12	-9.09773	0.207	0.349	1.86e-08	1
TUBA1B	1.28e-43	-10.0433	0.062	0.378	3.98e-40	1
HIST1H3G	7.25e-24	-10.2583	0.011	0.256	2.26e-20	1
TOP2A	1.63e-39	-10.6576	0.021	0.315	5.07e-36	1
HIST1H3B	3.43e-22	-11.6842	0.023	0.267	1.07e-18	1
HIST1H2AJ	1.97e-13	-12.0329	0.04	0.263	6.16e-10	1
HIST1H1B	5.58e-32	-12.572	0.032	0.266	1.74e-28	1
AOAH	5.47e-18	4.94116	0.254	0.162	1.71e-14	2
IKZF3	2.15e-27	4.8094	0.318	0.182	6.7e-24	2
NEAT1	1.04e-20	4.05213	0.361	0.258	3.24e-17	2
TRAC	1.58e-06	3.99458	0.325	0.352	0.00491218	2
ACP5	4.8e-51	3.90701	0.3	0.127	1.5e-47	2
LPAR6	6.36e-22	3.89644	0.484	0.332	1.98e-18	2
JAML	9.04e-18	3.53568	0.434	0.311	2.82e-14	2
RAB37	1.18e-29	3.5284	0.259	0.177	3.68e-26	2
CCL5	4.16e-159	3.35009	0.89	0.436	1.3e-155	2
NKG7	1.49e-79	3.23843	0.788	0.502	4.63e-76	2
CD8B	1.74e-42	3.06584	0.638	0.428	5.41e-39	2
PRKCQ-AS1	1.37e-12	3.00339	0.25	0.254	4.28e-09	2
MALAT1	1.13e-62	2.97299	0.627	0.348	3.52e-59	2
GZMK	4.03e-44	2.83445	0.282	0.123	1.26e-40	2
ATM	5.79e-18	2.78611	0.261	0.194	1.81e-14	2
RDH10	4.02e-20	2.66739	0.402	0.31	1.25e-16	2
ATP10D	3.04e-22	2.5179	0.309	0.212	9.49e-19	2
SH3BP5-AS1	1.76e-79	2.48813	0.277	0.096	5.5e-76	2
RABGAP1L	2.18e-08	2.47423	0.257	0.24	6.8e-05	2
BHLHE40	6.9e-07	2.44223	0.32	0.315	0.00215288	2
ABCB1	1.75e-43	2.38572	0.312	0.107	5.45e-40	2
SERINC1	7.32e-25	2.38446	0.3	0.221	2.28e-21	2
PDPK1	1.76e-37	2.3423	0.258	0.117	5.5e-34	2
SAMD9	1.28e-18	2.33734	0.313	0.243	3.98e-15	2
CST7	9.26e-67	2.33283	0.73	0.42	2.89e-63	2
SNAP47	2.07e-21	2.32585	0.348	0.276	6.45e-18	2
SLAMF7	2.1e-12	2.27758	0.269	0.239	6.56e-09	2
AL009179.2	1.07e-67	2.24594	0.264	0.115	3.32e-64	2
MOSPD2	4.3e-26	2.21765	0.262	0.144	1.34e-22	2
IL2RB	7.97e-21	2.19369	0.318	0.259	2.49e-17	2
CD2	5.81e-41	2.18552	0.628	0.404	1.81e-37	2
AC007384.1	2.02e-56	2.13533	0.28	0.119	6.31e-53	2
UTRN	7.56e-18	2.13525	0.331	0.249	2.36e-14	2
F2R	4.57e-08	2.11652	0.288	0.271	0.000142622	2
LINC00467	1.07e-29	2.06443	0.251	0.139	3.33e-26	2
RESF1	3.51e-18	2.05971	0.481	0.356	1.1e-14	2
PLAAT4	1.71e-18	2.04586	0.589	0.449	5.34e-15	2
GIPR	1.48e-50	2.02637	0.252	0.134	4.61e-47	2
GBP2	4.94e-24	2.01528	0.373	0.298	1.54e-20	2
MT1F	1.63e-30	1.98459	0.251	0.134	5.07e-27	2
GLIPR1	7.67e-19	1.93654	0.427	0.324	2.39e-15	2
FXYD2	3.08e-07	1.92156	0.362	0.344	0.000961355	2
EIF4A2	1.76e-27	1.91912	0.3	0.229	5.49e-24	2
SPOCK1	1.52e-35	1.91813	0.264	0.152	4.72e-32	2
COL18A1	1.01e-66	1.91418	0.266	0.116	3.14e-63	2
LYN	2.45e-40	1.91362	0.327	0.158	7.64e-37	2
SLC14A1	5.06e-36	1.85368	0.291	0.186	1.58e-32	2
CCDC122	9.82e-52	1.85077	0.284	0.121	3.06e-48	2
NCR3	7.23e-08	1.84685	0.316	0.298	0.000225368	2
GIMAP7	3.04e-06	1.84299	0.229	0.256	0.00947276	2
RAD51-AS1	4.52e-46	1.83364	0.307	0.137	1.41e-42	2
MAP1LC3A	1.04e-38	1.8133	0.25	0.127	3.26e-35	2
IRF1	4.77e-19	1.7819	0.336	0.296	1.49e-15	2
MX2	4.3e-37	1.76874	0.312	0.131	1.34e-33	2
IGF1	2.72e-24	1.76559	0.261	0.163	8.48e-21	2
ARSK	4.77e-26	1.76174	0.258	0.15	1.49e-22	2
IZUMO4	1.84e-46	1.74919	0.307	0.17	5.74e-43	2
MACROD1	4.41e-42	1.69461	0.294	0.178	1.38e-38	2
IGFLR1	1.57e-20	1.68668	0.286	0.218	4.91e-17	2
APOBEC3G	5.32e-07	1.67843	0.358	0.344	0.00165788	2
CCDC141	7.89e-31	1.66969	0.322	0.186	2.46e-27	2
TMEM173	2.54e-07	1.66169	0.219	0.255	0.000792961	2
ARAP2	2.02e-15	1.62869	0.341	0.263	6.31e-12	2
ARHGAP12	1.55e-54	1.62489	0.279	0.133	4.82e-51	2
PRRC2B	2.37e-12	1.61927	0.264	0.216	7.41e-09	2
OPTN	1.55e-06	1.61413	0.394	0.361	0.00482412	2
AC015982.2	2.22e-61	1.61281	0.315	0.147	6.92e-58	2
LYST	9.12e-25	1.53287	0.465	0.291	2.84e-21	2
HMOX2	4.76e-15	1.5295	0.262	0.242	1.48e-11	2
EVI2B	1.33e-09	1.51736	0.393	0.343	4.15e-06	2
RPS19	2e-14	1.49578	0.558	0.437	6.24e-11	2
MFSD13A	2.45e-43	1.4831	0.284	0.147	7.65e-40	2
ZNF354A	1.37e-47	1.48006	0.287	0.155	4.28e-44	2
TTN	1.28e-26	1.47505	0.379	0.217	4e-23	2
RORA-AS1	1.62e-48	1.44775	0.261	0.143	5.04e-45	2
CD8A	1.28e-36	1.43696	0.735	0.535	3.99e-33	2
NELL2	2.7e-33	1.42151	0.273	0.124	8.4e-30	2
ETS1	7.31e-11	1.39001	0.517	0.395	2.28e-07	2
UCP2	5.84e-17	1.36652	0.441	0.329	1.82e-13	2
PRF1	7.09e-62	1.33409	0.724	0.445	2.21e-58	2
GYPC	1.18e-06	1.30505	0.282	0.313	0.00366853	2
HLA-DQB1	1.64e-16	1.2923	0.28	0.244	5.13e-13	2
CD48	6.25e-06	1.27865	0.394	0.369	0.0194804	2
IL10RA	1.11e-09	1.23483	0.318	0.279	3.47e-06	2
HCST	6.33e-28	1.2258	0.61	0.42	1.97e-24	2
PNRC1	5.42e-36	1.21756	0.58	0.374	1.69e-32	2
CD3G	1.81e-14	1.19988	0.573	0.434	5.64e-11	2
PTPRCAP	4.43e-30	1.1989	0.581	0.378	1.38e-26	2
PYHIN1	7.1e-10	1.18919	0.293	0.272	2.21e-06	2
CEBPD	4.8e-16	1.17562	0.284	0.257	1.5e-12	2
STK17A	2.65e-12	1.16531	0.455	0.36	8.25e-09	2
PTPRC	5.91e-15	1.15281	0.513	0.389	1.84e-11	2
TC2N	8.04e-18	1.13799	0.483	0.371	2.51e-14	2
SLC27A1	4.61e-43	1.11963	0.264	0.134	1.44e-39	2
TIGIT	3.73e-19	1.11499	0.372	0.302	1.16e-15	2
WDR89	5.41e-65	1.10908	0.329	0.123	1.69e-61	2
CNBD2	6.07e-33	1.09486	0.279	0.157	1.89e-29	2
CD27	1.27e-33	1.09051	0.3	0.156	3.95e-30	2
ITGB1	1.05e-05	1.08327	0.39	0.341	0.0327793	2
ALOX5AP	1.04e-20	1.044	0.569	0.432	3.24e-17	2
CD7	1.17e-37	1.04273	0.573	0.378	3.64e-34	2
DDHD1	8.31e-21	1.03469	0.273	0.17	2.59e-17	2
ITM2B	4.65e-16	1.02595	0.552	0.407	1.45e-12	2
HLA-E	1.69e-28	1.01434	0.588	0.402	5.26e-25	2
CTSS	3.4e-28	0.987934	0.261	0.203	1.06e-24	2
FYN	1.24e-12	0.966843	0.39	0.307	3.88e-09	2
CCND2	4.67e-31	0.964098	0.395	0.253	1.46e-27	2
C9orf72	2.24e-28	0.955526	0.265	0.178	6.97e-25	2
HLA-A	2.1e-16	0.929716	0.54	0.415	6.54e-13	2
HLA-DQA1	7.37e-10	0.916601	0.477	0.398	2.3e-06	2
RNF146	4.39e-25	0.882653	0.251	0.156	1.37e-21	2
SLFN5	6.82e-06	0.880254	0.369	0.297	0.0212672	2
NFIA	5.23e-60	0.871591	0.308	0.138	1.63e-56	2
GZMM	3.33e-28	0.870517	0.329	0.236	1.04e-24	2
MACF1	1.67e-09	0.868025	0.318	0.295	5.22e-06	2
GBP5	4.82e-16	0.856951	0.323	0.255	1.5e-12	2
MYO1F	2.28e-15	0.856481	0.312	0.259	7.1e-12	2
PDCD4	7.35e-27	0.853371	0.402	0.284	2.29e-23	2
MOCS3	9.55e-57	0.831117	0.254	0.132	2.98e-53	2
STK17B	1.54e-09	0.809622	0.53	0.399	4.8e-06	2
IL16	5.59e-06	0.802074	0.313	0.323	0.0174302	2
PCED1B-AS1	2.97e-22	0.794189	0.479	0.372	9.25e-19	2
FBXL20	2.5e-25	0.767154	0.261	0.146	7.8e-22	2
EVA1B	1.42e-42	0.762316	0.255	0.127	4.44e-39	2
RSRP1	3.81e-14	0.761899	0.331	0.294	1.19e-10	2
HLA-C	9.59e-10	0.747725	0.528	0.439	2.99e-06	2
ITGAL	3.26e-17	0.741978	0.409	0.347	1.02e-13	2
CYTIP	7.53e-15	0.72472	0.291	0.303	2.35e-11	2
RHOC	1.48e-12	0.71805	0.449	0.383	4.62e-09	2
MXD4	1.26e-14	0.711325	0.268	0.205	3.94e-11	2
AL590705.1	5.24e-37	0.69371	0.291	0.194	1.63e-33	2
GZMH	2.77e-27	0.681264	0.394	0.296	8.65e-24	2
AC006213.2	3.18e-57	0.661498	0.266	0.114	9.92e-54	2
SERPINB1	3.69e-15	0.658529	0.393	0.344	1.15e-11	2
TPT1	3.51e-27	0.656035	0.584	0.388	1.09e-23	2
GOLGB1	8.76e-12	0.653209	0.369	0.344	2.73e-08	2
PCNX2	6.91e-53	0.621633	0.27	0.138	2.16e-49	2
CMTM3	1.75e-28	0.61878	0.316	0.274	5.44e-25	2
LAG3	1.13e-08	0.617635	0.423	0.354	3.54e-05	2
EVL	1.36e-05	0.610034	0.467	0.395	0.0424459	2
GPSM3	1.27e-05	0.607349	0.445	0.387	0.0396326	2
FYB1	3.26e-14	0.577586	0.52	0.399	1.02e-10	2
VPS13C	3.78e-14	0.572886	0.34	0.292	1.18e-10	2
SLC4A7	1.09e-05	0.571787	0.304	0.279	0.0339992	2
GSTK1	1.29e-08	0.553202	0.433	0.349	4.04e-05	2
LIMD2	4.99e-06	0.550902	0.488	0.4	0.0155677	2
NCF4	8.9e-07	0.482396	0.276	0.296	0.00277423	2
KLRK1	2.43e-15	0.472278	0.487	0.389	7.57e-12	2
HLA-DPB1	2.25e-09	0.464629	0.456	0.393	7e-06	2
TBC1D10C	1.04e-19	0.41248	0.298	0.274	3.25e-16	2
B2M	2.54e-30	0.399419	0.545	0.347	7.91e-27	2
CLDND1	5.13e-10	0.395812	0.494	0.403	1.6e-06	2
DDX5	8e-14	0.376607	0.535	0.402	2.49e-10	2
SH3YL1	2.38e-46	0.363733	0.27	0.155	7.43e-43	2
CD37	4.72e-10	0.359813	0.463	0.372	1.47e-06	2
HLA-DRB5	1.77e-18	0.351539	0.383	0.341	5.53e-15	2
ATP6V1G1	1.45e-06	0.325921	0.415	0.372	0.00453171	2
BTG1	2.31e-07	0.303748	0.433	0.355	0.000721588	2
APOBEC3H	7.73e-17	0.286964	0.311	0.294	2.41e-13	2
RPL12	7.11e-06	0.268719	0.501	0.429	0.0221742	2
VCAM1	4.2e-29	-0.255302	0.282	0.185	1.31e-25	2
AC026748.3	4.09e-60	-0.265308	0.262	0.138	1.27e-56	2
CD247	4.79e-14	-0.265525	0.294	0.28	1.49e-10	2
ICAM3	1.27e-16	-0.272653	0.295	0.273	3.96e-13	2
RBM26-AS1	3.19e-49	-0.30522	0.283	0.152	9.95e-46	2
INPP5D	4.48e-27	-0.309328	0.252	0.18	1.4e-23	2
TSC22D3	1.04e-06	-0.375648	0.474	0.393	0.00323109	2
GIMAP4	5.23e-21	-0.38958	0.322	0.25	1.63e-17	2
CD74	9.99e-07	-0.42881	0.506	0.435	0.00311442	2
NPC2	9.41e-09	-0.445584	0.219	0.252	2.93e-05	2
CTSW	2.91e-11	-0.523685	0.566	0.464	9.07e-08	2
GAS5	1.07e-09	-0.663454	0.294	0.286	3.34e-06	2
ANXA5	4.44e-16	-0.673338	0.331	0.46	1.38e-12	2
SAT1	1.53e-13	-0.674928	0.46	0.34	4.77e-10	2
TPM4	3.56e-10	-0.732462	0.198	0.387	1.11e-06	2
PDE3B	6.33e-12	-0.75276	0.288	0.286	1.98e-08	2
ITM2A	1.88e-06	-0.761225	0.322	0.429	0.00585381	2
CD52	1.21e-32	-0.787301	0.487	0.3	3.77e-29	2
DDX24	4.62e-12	-0.787727	0.279	0.295	1.44e-08	2
GEM	2.03e-47	-0.806422	0.254	0.128	6.33e-44	2
PTPN22	3.33e-16	-0.816339	0.458	0.356	1.04e-12	2
PPIB	9.29e-10	-0.823109	0.348	0.437	2.9e-06	2
LRRN3	1.44e-12	-0.82542	0.312	0.274	4.5e-09	2
TPI1	2.03e-18	-0.838513	0.309	0.475	6.33e-15	2
S100A11	7.52e-10	-0.84292	0.287	0.389	2.35e-06	2
ZFP36	1.39e-05	-0.910867	0.323	0.315	0.043252	2
IL7R	7.2e-08	-0.926182	0.259	0.231	0.000224577	2
SYTL3	7.45e-12	-0.984915	0.301	0.282	2.32e-08	2
RPS27L	6.57e-10	-1.06777	0.333	0.432	2.05e-06	2
IER2	3.71e-06	-1.07468	0.211	0.261	0.0115533	2
PPP2R5C	5.86e-10	-1.10778	0.334	0.294	1.83e-06	2
HLA-DMA	7.52e-06	-1.12631	0.358	0.36	0.0234468	2
TMSB4X	5.36e-24	-1.133	0.259	0.442	1.67e-20	2
ITGA1	6e-06	-1.13546	0.25	0.248	0.0187004	2
RNF213	3.07e-23	-1.19573	0.57	0.389	9.58e-20	2
HSPA8	3.84e-13	-1.20804	0.354	0.458	1.2e-09	2
TNFAIP3	5.46e-19	-1.34069	0.422	0.333	1.7e-15	2
MIF	3.42e-29	-1.34077	0.298	0.478	1.07e-25	2
PPIA	4.87e-43	-1.34345	0.275	0.507	1.52e-39	2
IFITM1	1.48e-08	-1.36393	0.3	0.423	4.61e-05	2
HNRNPA3	4.98e-22	-1.36979	0.316	0.473	1.55e-18	2
LAYN	1.03e-61	-1.38151	0.323	0.133	3.22e-58	2
STAT1	8.79e-09	-1.38451	0.264	0.219	2.74e-05	2
CDK2AP2	6.36e-13	-1.40481	0.251	0.424	1.98e-09	2
ENO1	2.47e-36	-1.40858	0.302	0.509	7.69e-33	2
SFPQ	2.23e-20	-1.43602	0.219	0.434	6.96e-17	2
RPLP0	4.78e-38	-1.52788	0.277	0.492	1.49e-34	2
HSP90AA1	1.41e-11	-1.54732	0.355	0.474	4.41e-08	2
ATP8B4	1.55e-25	-1.57742	0.276	0.168	4.85e-22	2
ANXA2	1.2e-28	-1.58075	0.257	0.463	3.75e-25	2
AL627171.2	1.4e-11	-1.60751	0.361	0.304	4.38e-08	2
PKM	3.85e-30	-1.62343	0.287	0.491	1.2e-26	2
ANP32B	3.84e-20	-1.63699	0.247	0.439	1.2e-16	2
TMSB10	4.25e-26	-1.65594	0.284	0.466	1.33e-22	2
CFL1	8.47e-46	-1.65967	0.27	0.501	2.64e-42	2
LDHA	2.08e-12	-1.67929	0.175	0.4	6.49e-09	2
TAGLN2	4.46e-06	-1.7128	0.362	0.463	0.0138993	2
HP1BP3	3.56e-11	-1.73373	0.351	0.445	1.11e-07	2
BIVM	1.89e-27	-1.75858	0.262	0.177	5.9e-24	2
PFN1	1e-71	-1.77809	0.211	0.535	3.12e-68	2
RAN	2.22e-36	-1.82444	0.237	0.487	6.94e-33	2
CLEC2B	1.59e-05	-1.89453	0.451	0.422	0.049709	2
GAPDH	1.73e-64	-1.95963	0.273	0.573	5.41e-61	2
HNRNPA2B1	1.46e-63	-2.0665	0.207	0.517	4.54e-60	2
DEK	3.75e-18	-2.07363	0.262	0.459	1.17e-14	2
S100A10	9.28e-36	-2.09612	0.208	0.419	2.89e-32	2
TCF25	1.49e-05	-2.10724	0.297	0.29	0.0463548	2
PROK2	3.74e-31	-2.30461	0.25	0.141	1.17e-27	2
CALR	8.22e-13	-2.33758	0.277	0.438	2.56e-09	2
SH2D2A	1.58e-06	-2.33974	0.286	0.3	0.00491249	2
CALM2	8.22e-24	-2.38623	0.304	0.462	2.56e-20	2
S100A4	2.14e-13	-2.43385	0.244	0.377	6.68e-10	2
ACTG1	4.26e-57	-2.54056	0.222	0.48	1.33e-53	2
JPT1	2.2e-15	-2.67976	0.18	0.383	6.85e-12	2
RAD21	2.35e-09	-2.6944	0.209	0.382	7.32e-06	2
ANP32E	6.38e-30	-2.69586	0.125	0.381	1.99e-26	2
SMC4	2.24e-09	-2.79038	0.186	0.364	7e-06	2
S100A6	2.01e-15	-2.98629	0.257	0.399	6.27e-12	2
GSTP1	9.45e-11	-3.12387	0.333	0.469	2.95e-07	2
H2AFV	2.11e-55	-3.18015	0.193	0.481	6.57e-52	2
HSP90B1	1.26e-07	-3.2574	0.348	0.444	0.000393024	2
RSRC2	1.8e-10	-3.32929	0.24	0.253	5.61e-07	2
LMNB1	2.18e-07	-3.41457	0.057	0.254	0.000679216	2
LTB	3.66e-13	-3.41816	0.336	0.267	1.14e-09	2
TXN	1.43e-27	-3.68106	0.259	0.44	4.45e-24	2
NUCKS1	1.86e-18	-3.71274	0.155	0.392	5.79e-15	2
CRIP1	5.01e-44	-3.94412	0.225	0.47	1.56e-40	2
VIM	2.74e-87	-4.02602	0.179	0.534	8.54e-84	2
NUCB2	1.36e-08	-4.03261	0.112	0.304	4.25e-05	2
TXNIP	8.66e-19	-4.20062	0.44	0.308	2.7e-15	2
TMPO	1.45e-12	-4.29379	0.092	0.358	4.52e-09	2
HMGB1	1.67e-80	-4.37989	0.158	0.498	5.21e-77	2
KIF20B	7.56e-12	-4.4741	0.08	0.284	2.36e-08	2
ACTB	1.47e-126	-4.52355	0.144	0.57	4.58e-123	2
DUT	5.93e-08	-4.60221	0.154	0.36	0.000185019	2
H2AFX	5.24e-06	-4.64432	0.058	0.28	0.016333	2
CKS1B	5.21e-11	-4.65953	0.037	0.286	1.62e-07	2
HIST1H1C	5.77e-12	-5.46879	0.218	0.375	1.8e-08	2
CENPE	3.91e-10	-5.51569	0.033	0.266	1.22e-06	2
H2AFZ	6.04e-66	-5.72549	0.154	0.463	1.88e-62	2
HIST2H2AC	2.98e-08	-5.92449	0.198	0.331	9.3e-05	2
PTTG1	2.94e-23	-5.93473	0.147	0.405	9.17e-20	2
UBE2S	6.96e-09	-6.03556	0.092	0.343	2.17e-05	2
PTMA	3.45e-122	-6.14841	0.072	0.507	1.08e-118	2
HMGB2	1.31e-65	-6.20967	0.121	0.432	4.09e-62	2
CKS2	1.18e-06	-6.21395	0.055	0.32	0.00366853	2
TPX2	1.37e-29	-6.41097	0.019	0.293	4.26e-26	2
SQSTM1	2.68e-10	-6.51886	0.387	0.293	8.36e-07	2
LGALS1	5.24e-59	-6.5474	0.129	0.447	1.63e-55	2
PCLAF	2.3e-07	-6.65631	0.033	0.293	0.000717539	2
TUBB4B	7.22e-21	-6.76599	0.083	0.359	2.25e-17	2
DLGAP5	3.02e-16	-6.89389	0.01	0.26	9.42e-13	2
FTH1	7.66e-23	-7.03527	0.158	0.303	2.39e-19	2
HMGN2	3.17e-99	-7.10571	0.053	0.476	9.87e-96	2
TUBA1C	1.47e-14	-7.25967	0.068	0.302	4.6e-11	2
TYMS	7.65e-07	-7.33092	0.026	0.293	0.00238563	2
HIST1H3D	4.81e-07	-7.44708	0.057	0.262	0.00150122	2
NUSAP1	1.56e-40	-7.77801	0.064	0.347	4.87e-37	2
ARL6IP1	8.99e-10	-8.23679	0.288	0.38	2.8e-06	2
RRM2	3.54e-10	-8.39412	0.006	0.257	1.1e-06	2
HIST1H2AM	2.86e-09	-8.50383	0.074	0.28	8.93e-06	2
UBE2C	7.44e-11	-8.59509	0.008	0.258	2.32e-07	2
TUBB	3.32e-48	-8.71531	0.06	0.37	1.03e-44	2
HIST1H1E	1.79e-26	-8.92673	0.139	0.368	5.6e-23	2
ASPM	9.03e-21	-8.93375	0.01	0.277	2.82e-17	2
STMN1	6.82e-81	-9.32572	0.012	0.422	2.13e-77	2
HIST1H1D	1.6e-27	-9.43	0.15	0.358	4.97e-24	2
MKI67	4.26e-66	-9.54655	0.031	0.389	1.33e-62	2
CENPF	2.73e-50	-10.1544	0.011	0.335	8.53e-47	2
HIST1H3G	9.49e-18	-10.2545	0.008	0.256	2.96e-14	2
TOP2A	4.71e-32	-10.6936	0.01	0.317	1.47e-28	2
TUBA1B	6.43e-75	-11.3028	0.004	0.386	2e-71	2
HIST1H3B	1.94e-24	-11.7977	0.015	0.268	6.05e-21	2
HIST1H4C	3.09e-38	-11.9249	0.022	0.284	9.63e-35	2
HIST1H2AJ	3.19e-13	-12.2751	0.014	0.267	9.94e-10	2
HIST1H1B	1.97e-25	-12.5646	0.033	0.266	6.14e-22	2
FAM3C	4.86e-18	4.28516	0.292	0.222	1.52e-14	3
RCBTB2	2.24e-20	3.37925	0.318	0.24	6.97e-17	3
EGLN3	2.6e-23	3.19736	0.276	0.157	8.12e-20	3
GIMAP1	9.72e-24	2.83484	0.27	0.199	3.03e-20	3
TRIM34	9.2e-19	2.79671	0.258	0.154	2.87e-15	3
CD27	3.65e-18	2.51881	0.263	0.165	1.14e-14	3
TESC	3.15e-07	2.48234	0.293	0.294	0.000983052	3
CD244	1.09e-47	2.45715	0.362	0.146	3.41e-44	3
NPC1	7.23e-30	2.3007	0.281	0.135	2.25e-26	3
HSD3B7	4.1e-35	2.25409	0.263	0.156	1.28e-31	3
SUOX	8.92e-40	2.21788	0.299	0.15	2.78e-36	3
PLEK	2.6e-43	2.16714	0.29	0.122	8.12e-40	3
FAIM	1.47e-32	2.15558	0.309	0.151	4.6e-29	3
SLC25A29	1.44e-55	2.1214	0.256	0.107	4.48e-52	3
HOPX	2.88e-30	2.08361	0.698	0.474	8.96e-27	3
ABHD15	1.01e-20	2.07957	0.263	0.154	3.16e-17	3
ZNF343	7.71e-50	2.05523	0.276	0.118	2.4e-46	3
CD300C	2.64e-43	2.05262	0.373	0.17	8.24e-40	3
AC124248.2	9.87e-50	2.04493	0.265	0.106	3.08e-46	3
ARHGAP12	1.26e-45	2.03956	0.277	0.137	3.93e-42	3
CTSW	5.76e-21	2.03644	0.634	0.459	1.8e-17	3
NADK2	1.87e-32	2.02227	0.251	0.1	5.82e-29	3
MTSS1	2e-27	2.00678	0.251	0.134	6.22e-24	3
CCDC136	6.73e-59	1.95958	0.35	0.128	2.1e-55	3
CEBPD	1.79e-12	1.95658	0.311	0.255	5.58e-09	3
ITGA1	1.04e-11	1.91133	0.281	0.244	3.23e-08	3
AL357033.4	8.45e-60	1.84348	0.295	0.121	2.63e-56	3
AC022706.1	3.5e-40	1.83877	0.306	0.163	1.09e-36	3
GNLY	4.08e-87	1.83452	0.73	0.349	1.27e-83	3
AC104078.1	4.89e-41	1.83293	0.316	0.119	1.52e-37	3
WNT11	2.25e-21	1.7869	0.263	0.125	7.02e-18	3
AC010969.2	3.55e-53	1.74402	0.265	0.086	1.11e-49	3
DYNC2H1	7.75e-24	1.66701	0.26	0.141	2.42e-20	3
TGM5	6.93e-38	1.65729	0.297	0.131	2.16e-34	3
LYN	1.53e-13	1.65357	0.253	0.172	4.77e-10	3
PLCG2	1.05e-19	1.61698	0.253	0.134	3.28e-16	3
SH3YL1	1.21e-28	1.56935	0.279	0.158	3.77e-25	3
AL359258.2	4.18e-58	1.49217	0.283	0.098	1.3e-54	3
EGFL6	3.5e-45	1.49027	0.318	0.145	1.09e-41	3
SLC29A3	4.25e-38	1.47007	0.29	0.153	1.32e-34	3
CATSPER1	6.69e-23	1.43375	0.265	0.152	2.08e-19	3
IFITM2	1.2e-11	1.41876	0.498	0.386	3.73e-08	3
BMERB1	1.24e-43	1.41459	0.332	0.141	3.86e-40	3
PRF1	3.88e-18	1.40895	0.625	0.466	1.21e-14	3
RMRP	2.04e-30	1.40297	0.304	0.152	6.36e-27	3
ZNF605	2.62e-39	1.39142	0.26	0.133	8.17e-36	3
PDGFD	1.63e-42	1.38842	0.299	0.157	5.09e-39	3
IRF1	1.48e-09	1.37032	0.322	0.299	4.62e-06	3
TECPR2	2.71e-28	1.34827	0.256	0.132	8.46e-25	3
JHY	1.95e-43	1.31718	0.337	0.132	6.09e-40	3
FBN1	1.34e-46	1.28442	0.314	0.153	4.19e-43	3
LINC00920	3.17e-60	1.25308	0.311	0.107	9.88e-57	3
SELPLG	6.39e-06	1.24487	0.348	0.322	0.01992	3
MGLL	1.03e-58	1.24304	0.27	0.063	3.2e-55	3
LINC02591	4.13e-46	1.17003	0.263	0.125	1.29e-42	3
AC069544.1	2.21e-42	1.15837	0.295	0.15	6.9e-39	3
RABL2A	1.29e-45	1.15819	0.281	0.116	4.03e-42	3
IGF1	1.77e-29	1.11582	0.297	0.162	5.51e-26	3
XKR6	2.71e-32	1.10846	0.265	0.153	8.45e-29	3
IGHV1-3	9.39e-35	1.10601	0.269	0.145	2.93e-31	3
CTSD	1.41e-09	1.08095	0.482	0.377	4.4e-06	3
P2RY14	4.96e-56	1.08018	0.267	0.12	1.55e-52	3
MINDY1	5.87e-20	1.06045	0.254	0.196	1.83e-16	3
BBS10	3.43e-46	1.05359	0.254	0.113	1.07e-42	3
PLS3	2.73e-28	1.05191	0.345	0.17	8.52e-25	3
KCNQ1OT1	1.89e-43	1.00661	0.274	0.124	5.91e-40	3
AL031963.3	9.52e-34	0.991249	0.284	0.163	2.97e-30	3
PPP3CB-AS1	4.53e-44	0.990223	0.336	0.152	1.41e-40	3
TNFRSF9	2.34e-23	0.986175	0.288	0.142	7.28e-20	3
AC103702.2	1.88e-56	0.962034	0.29	0.115	5.86e-53	3
DLGAP1-AS1	1.04e-42	0.961715	0.251	0.116	3.24e-39	3
SH3BGRL3	6.67e-42	0.944518	0.666	0.408	2.08e-38	3
CCL3	5.48e-18	0.938486	0.428	0.286	1.71e-14	3
SLC4A7	1.2e-13	0.923358	0.318	0.278	3.75e-10	3
EVL	9.15e-14	0.908116	0.534	0.389	2.85e-10	3
HCST	2.66e-21	0.902946	0.602	0.427	8.3e-18	3
SLC14A1	2.32e-40	0.900093	0.339	0.184	7.24e-37	3
YPEL3	2.22e-06	0.885822	0.399	0.348	0.00691131	3
GAB3	3.18e-31	0.883447	0.251	0.121	9.91e-28	3
PRDX5	3.32e-13	0.869346	0.523	0.41	1.04e-09	3
TIAM2	2.36e-43	0.866404	0.267	0.122	7.35e-40	3
RHOC	2.04e-17	0.818948	0.491	0.38	6.37e-14	3
ZFP69B	8.11e-36	0.812434	0.27	0.174	2.53e-32	3
LINC01871	8.52e-13	0.782534	0.527	0.381	2.66e-09	3
EIF3J	5.51e-08	0.758544	0.233	0.254	0.000171937	3
CST7	7.76e-39	0.757208	0.671	0.436	2.42e-35	3
GLIPR1	2.15e-06	0.745096	0.403	0.33	0.00669574	3
ABCD1	6.83e-44	0.737175	0.316	0.155	2.13e-40	3
AC002091.2	1.16e-58	0.716717	0.254	0.093	3.62e-55	3
ZNF35	6.14e-29	0.705715	0.297	0.179	1.91e-25	3
AL356599.1	1.05e-40	0.704719	0.263	0.145	3.28e-37	3
AC092279.1	3.3e-31	0.703652	0.256	0.143	1.03e-27	3
CD53	5.7e-13	0.689767	0.519	0.405	1.78e-09	3
AL118558.3	1.06e-43	0.68357	0.293	0.148	3.31e-40	3
TFEB	2.51e-32	0.682669	0.26	0.115	7.83e-29	3
SERPINB1	5.77e-12	0.661188	0.417	0.342	1.8e-08	3
ALOX5AP	3.4e-19	0.654386	0.604	0.432	1.06e-15	3
MMP24OS	5.2e-15	0.644078	0.284	0.255	1.62e-11	3
LIMD2	2.28e-17	0.641143	0.539	0.397	7.1e-14	3
CKLF	4.42e-16	0.628533	0.583	0.418	1.38e-12	3
IMPACT	2.87e-21	0.615597	0.274	0.171	8.96e-18	3
TBC1D10C	5.12e-08	0.600179	0.284	0.276	0.000159755	3
GPSM3	2.48e-08	0.597036	0.496	0.383	7.73e-05	3
AP002807.1	4.53e-47	0.587048	0.311	0.16	1.41e-43	3
AL354696.2	5.04e-21	0.583372	0.276	0.183	1.57e-17	3
IL2RB	1.66e-13	0.54964	0.325	0.26	5.19e-10	3
GLO1	9.32e-12	0.511108	0.523	0.383	2.91e-08	3
SLAMF7	3e-09	0.507747	0.277	0.239	9.36e-06	3
ACP6	7.27e-31	0.504379	0.263	0.122	2.27e-27	3
RGS10	3.84e-06	0.492369	0.512	0.408	0.0119721	3
LAT	1.44e-15	0.484473	0.383	0.33	4.5e-12	3
ZCWPW1	2.69e-30	0.44288	0.314	0.178	8.37e-27	3
KLC4	2.19e-45	0.433453	0.29	0.161	6.82e-42	3
ZNF57	2.18e-39	0.422216	0.292	0.103	6.81e-36	3
AP002852.1	1.09e-67	0.408094	0.283	0.089	3.41e-64	3
CCL4	3.75e-06	0.397809	0.433	0.382	0.0116964	3
UCP2	3.78e-13	0.396252	0.375	0.34	1.18e-09	3
STK17B	1.44e-17	0.389716	0.539	0.402	4.48e-14	3
IL32	8.22e-32	0.389619	0.523	0.319	2.56e-28	3
ABCF3	2.11e-34	0.377922	0.274	0.156	6.59e-31	3
CD2	5.4e-21	0.377068	0.59	0.416	1.68e-17	3
RIOK1	4.52e-43	0.342443	0.254	0.144	1.41e-39	3
KIAA0825	2.68e-34	0.3255	0.281	0.138	8.34e-31	3
PDE6B	4.01e-32	0.308804	0.253	0.136	1.25e-28	3
SHFL	1.16e-22	0.305569	0.29	0.174	3.63e-19	3
GNPTAB	3.63e-10	0.270979	0.261	0.253	1.13e-06	3
GOLGB1	2.59e-06	0.268998	0.314	0.351	0.00807186	3
SRGN	9.56e-11	0.266045	0.479	0.385	2.98e-07	3
PIK3C3	1.14e-22	0.265813	0.272	0.16	3.54e-19	3
NCF4	3.74e-06	0.256165	0.297	0.293	0.0116715	3
CCDC141	1.62e-21	-0.251503	0.3	0.192	5.04e-18	3
OPTN	8.94e-06	-0.260833	0.362	0.366	0.0278705	3
TSPYL4	6.2e-25	-0.270346	0.286	0.171	1.93e-21	3
CUL7	3.29e-30	-0.299811	0.251	0.172	1.02e-26	3
APOBEC3G	2.84e-15	-0.324583	0.443	0.334	8.86e-12	3
SLC2A1-AS1	1.15e-54	-0.326156	0.314	0.139	3.6e-51	3
NICN1	1.19e-40	-0.331507	0.279	0.135	3.7e-37	3
ZNF354A	2.49e-28	-0.393339	0.251	0.163	7.77e-25	3
HLA-DQB1	2.58e-08	-0.429061	0.233	0.251	8.05e-05	3
IL16	1.07e-07	-0.474939	0.371	0.316	0.000334585	3
PRKCQ-AS1	3.22e-15	-0.54614	0.286	0.25	1e-11	3
AC064836.4	2.12e-40	-0.554687	0.302	0.16	6.62e-37	3
PNRC1	1.54e-07	-0.573317	0.505	0.389	0.000481721	3
FADS3	2.61e-44	-0.65115	0.253	0.118	8.14e-41	3
GZMB	4.39e-17	-0.688169	0.67	0.501	1.37e-13	3
LPAR6	1.03e-17	-0.71119	0.451	0.341	3.2e-14	3
TCP11L2	3.2e-31	-0.728942	0.302	0.108	9.98e-28	3
UTRN	4.77e-14	-0.730116	0.306	0.255	1.49e-10	3
GIMAP4	2.27e-08	-0.843443	0.276	0.258	7.08e-05	3
PPIA	9.59e-12	-0.878195	0.353	0.491	2.99e-08	3
NCL	1.74e-06	-0.883964	0.36	0.454	0.00543514	3
TGFBR3	1.48e-49	-0.89921	0.284	0.127	4.62e-46	3
HNRNPA3	1.56e-09	-0.930679	0.33	0.466	4.85e-06	3
CCL5	1.51e-47	-0.982242	0.769	0.465	4.71e-44	3
NFKBIA	1.23e-06	-0.993085	0.408	0.348	0.00382021	3
CREB3	2.12e-24	-1.01772	0.256	0.151	6.6e-21	3
SRSF7	6e-06	-1.04991	0.205	0.371	0.0187207	3
DENND2D	4.56e-27	-1.06561	0.253	0.192	1.42e-23	3
HSPA8	2.3e-11	-1.07317	0.336	0.457	7.17e-08	3
ATP10D	2.04e-17	-1.08716	0.297	0.217	6.36e-14	3
RGS18	1.44e-30	-1.09443	0.29	0.159	4.5e-27	3
SAMD3	1.96e-18	-1.1007	0.258	0.186	6.13e-15	3
ABI3	6.31e-10	-1.15423	0.26	0.213	1.97e-06	3
CD52	7.83e-12	-1.16558	0.385	0.317	2.44e-08	3
PDE3B	9.48e-09	-1.16971	0.253	0.29	2.96e-05	3
CLEC2B	1.01e-08	-1.17198	0.472	0.42	3.15e-05	3
SFPQ	7.22e-07	-1.23626	0.297	0.419	0.00224967	3
IER2	3.86e-09	-1.24269	0.27	0.252	1.2e-05	3
MLKL	6.85e-60	-1.24509	0.292	0.128	2.14e-56	3
LDHA	6.77e-06	-1.34958	0.254	0.383	0.0211171	3
HSP90AA1	1.89e-07	-1.36026	0.378	0.467	0.000590824	3
KDM7A	2.35e-51	-1.36236	0.32	0.124	7.31e-48	3
RANBP1	6.34e-06	-1.3791	0.173	0.294	0.0197738	3
TTN	1.63e-07	-1.38637	0.254	0.236	0.000508587	3
GIMAP7	8.9e-07	-1.45122	0.23	0.255	0.00277598	3
GZMA	2.97e-10	-1.46689	0.643	0.52	9.25e-07	3
RAN	1.18e-15	-1.47407	0.307	0.471	3.67e-12	3
BTG2	2.85e-19	-1.51961	0.293	0.22	8.9e-16	3
ALYREF	3.67e-06	-1.53819	0.191	0.336	0.0114394	3
RPL13A	1.65e-06	-1.54179	0.318	0.408	0.00514298	3
HNRNPA2B1	4.5e-24	-1.56265	0.302	0.496	1.4e-20	3
RNF213	2.31e-08	-1.63663	0.504	0.403	7.19e-05	3
HP1BP3	4.16e-07	-1.70927	0.322	0.445	0.00129718	3
DDIT4	2.09e-09	-1.87345	0.29	0.208	6.51e-06	3
ANP32B	5.56e-13	-1.88556	0.233	0.435	1.74e-09	3
SIVA1	4.77e-06	-1.89433	0.143	0.296	0.0148648	3
SMC3	1.63e-06	-1.95913	0.157	0.323	0.00509452	3
S100A6	4.85e-08	-1.97973	0.456	0.371	0.000151211	3
IL7	1.56e-50	-2.07783	0.292	0.142	4.87e-47	3
SCML4	9.38e-20	-2.16825	0.267	0.157	2.92e-16	3
DEK	9.52e-18	-2.43407	0.272	0.451	2.97e-14	3
JPT1	1.91e-12	-2.74547	0.214	0.373	5.96e-09	3
ANP32E	1.37e-14	-2.79122	0.147	0.37	4.27e-11	3
RAD21	1.61e-15	-2.8837	0.17	0.381	5.03e-12	3
H2AFV	2.33e-25	-3.09289	0.235	0.467	7.26e-22	3
VIM	6.92e-33	-3.30227	0.267	0.513	2.16e-29	3
CRIP1	3.68e-22	-3.44422	0.251	0.459	1.15e-18	3
NUCKS1	3.75e-14	-3.68332	0.166	0.383	1.17e-10	3
PLIN2	2.31e-06	-3.85291	0.336	0.324	0.00720946	3
HMGB1	2.02e-41	-4.08721	0.187	0.484	6.29e-38	3
TMPO	1.26e-18	-4.10947	0.115	0.347	3.93e-15	3
CKS1B	6.94e-07	-4.60868	0.044	0.277	0.00216282	3
DUT	3.25e-06	-5.10849	0.182	0.35	0.0101272	3
CENPE	3.4e-06	-5.29693	0.049	0.257	0.0105882	3
PTMA	1.3e-47	-5.3514	0.168	0.482	4.05e-44	3
TXNIP	1.17e-05	-5.75836	0.364	0.321	0.0364826	3
FGFBP3	1.12e-50	-5.76398	0.256	0.133	3.49e-47	3
HIST2H2AC	1.15e-06	-5.85768	0.184	0.328	0.00357637	3
H2AFZ	9.05e-43	-5.89595	0.157	0.453	2.82e-39	3
PTTG1	1.01e-33	-5.90305	0.168	0.394	3.14e-30	3
CKS2	4.6e-06	-5.92597	0.108	0.306	0.0143456	3
UBE2S	7.67e-14	-6.02607	0.106	0.334	2.39e-10	3
SQSTM1	1e-08	-6.05361	0.385	0.296	3.12e-05	3
HMGB2	1.49e-47	-6.21558	0.11	0.423	4.63e-44	3
TPX2	2.03e-08	-6.24653	0.028	0.283	6.33e-05	3
TUBB4B	1.39e-09	-6.66284	0.11	0.347	4.33e-06	3
DLGAP5	1.45e-10	-6.84804	0.007	0.253	4.52e-07	3
HMGN2	2.05e-63	-6.91175	0.094	0.458	6.38e-60	3
TUBA1C	1.04e-06	-7.00601	0.09	0.292	0.00324392	3
HIST1H1C	2.06e-18	-7.21568	0.194	0.373	6.41e-15	3
TYMS	8.15e-10	-7.27154	0.078	0.279	2.54e-06	3
NUSAP1	3.22e-20	-7.7558	0.055	0.339	1e-16	3
ARL6IP1	2.31e-15	-8.23761	0.23	0.384	7.19e-12	3
HIST1H1B	4.52e-14	-8.46959	0.044	0.257	1.41e-10	3
UBE2C	2.33e-07	-8.56566	0.009	0.25	0.000724945	3
TUBB	1.49e-38	-8.60359	0.071	0.359	4.65e-35	3
HIST1H2AM	5.71e-15	-8.70925	0.064	0.274	1.78e-11	3
HIST1H1D	8.64e-23	-8.85691	0.161	0.35	2.69e-19	3
STMN1	8.22e-44	-8.86674	0.039	0.406	2.56e-40	3
ASPM	2.18e-13	-8.86802	0.012	0.269	6.79e-10	3
HIST1H1E	2.77e-13	-8.98413	0.17	0.357	8.64e-10	3
MKI67	1.75e-37	-9.35034	0.049	0.375	5.46e-34	3
CENPF	4.9e-20	-9.88594	0.025	0.323	1.53e-16	3
HIST1H4C	5.25e-21	-9.90835	0.028	0.275	1.64e-17	3
TOP2A	1.24e-22	-10.6432	0.011	0.307	3.87e-19	3
TUBA1B	1.09e-48	-10.7427	0.023	0.371	3.39e-45	3
HIST1H2AJ	1.47e-09	-11.0951	0.019	0.258	4.6e-06	3
HIST1H3B	6.63e-09	-11.1352	0.027	0.259	2.07e-05	3
CD69	5.37e-62	6.00011	0.658	0.347	1.68e-58	4
EGR1	3.82e-27	5.56793	0.363	0.087	1.19e-23	4
FOSB	1.86e-34	5.34917	0.338	0.137	5.8e-31	4
BTG2	5.44e-18	5.1675	0.386	0.211	1.7e-14	4
FOS	4.63e-65	4.16759	0.628	0.303	1.44e-61	4
JUN	1.16e-19	4.10751	0.478	0.332	3.63e-16	4
DUSP6	3.66e-17	3.94729	0.384	0.185	1.14e-13	4
RHOB	3.57e-13	3.90538	0.261	0.148	1.11e-09	4
TMEM65	2.29e-19	3.72988	0.28	0.125	7.14e-16	4
TNF	2.31e-18	3.6646	0.325	0.123	7.2e-15	4
KLF6	1.14e-28	3.62959	0.612	0.407	3.54e-25	4
IER2	1.81e-22	3.61245	0.429	0.235	5.64e-19	4
NFKBIZ	9.02e-16	3.57207	0.251	0.091	2.81e-12	4
ZFP36	6.73e-24	3.49915	0.499	0.296	2.1e-20	4
LGALS8	2.84e-12	3.34948	0.257	0.199	8.87e-09	4
RGS1	7.82e-16	3.20322	0.318	0.251	2.44e-12	4
RTN2	4.66e-37	3.18135	0.274	0.101	1.45e-33	4
ITGA1	1.77e-06	3.13904	0.378	0.234	0.00553249	4
CYLD	2.12e-19	3.06603	0.259	0.205	6.6e-16	4
CCL3	4.98e-16	3.05409	0.414	0.288	1.55e-12	4
TTN	3.1e-09	3.05057	0.319	0.229	9.66e-06	4
JUNB	3.98e-39	3.00317	0.469	0.223	1.24e-35	4
FAM117B	9.19e-49	2.78015	0.333	0.101	2.86e-45	4
PREX1	1.21e-18	2.77954	0.359	0.195	3.76e-15	4
LAYN	7.29e-14	2.77459	0.25	0.149	2.27e-10	4
TMEM184C	2.19e-24	2.75822	0.251	0.147	6.83e-21	4
NSMF	1.41e-16	2.73053	0.293	0.13	4.39e-13	4
DUSP1	3.55e-22	2.68987	0.518	0.36	1.11e-18	4
SYNGAP1	1.66e-50	2.66277	0.365	0.132	5.16e-47	4
IFIT5	3.36e-38	2.65226	0.31	0.135	1.05e-34	4
DAPK2	4.4e-18	2.52451	0.25	0.127	1.37e-14	4
PHLDA1	3.39e-20	2.51866	0.526	0.375	1.06e-16	4
MCL1	1.95e-19	2.48706	0.401	0.29	6.07e-16	4
RBM7	3.8e-22	2.41187	0.293	0.132	1.19e-18	4
TLR6	3.22e-53	2.40649	0.25	0.068	1e-49	4
AHI1	2.61e-12	2.38482	0.321	0.266	8.13e-09	4
STAP1	3.88e-21	2.20859	0.276	0.125	1.21e-17	4
IL32	1.35e-65	2.17619	0.662	0.306	4.21e-62	4
BST2	1.69e-11	2.1339	0.518	0.397	5.26e-08	4
AC244213.1	4.57e-59	2.13116	0.325	0.057	1.42e-55	4
SCML4	1.16e-18	2.11372	0.297	0.155	3.6e-15	4
SPACA6	2.85e-62	2.09668	0.259	0.046	8.87e-59	4
GK	3.41e-24	2.07631	0.259	0.136	1.06e-20	4
MPZL2	7.97e-48	2.06764	0.348	0.08	2.48e-44	4
EFCAB13	3.01e-45	2.00595	0.268	0.094	9.37e-42	4
SLC16A6	4.09e-35	2.00514	0.25	0.104	1.28e-31	4
UAP1L1	9.14e-61	1.99471	0.353	0.094	2.85e-57	4
SRXN1	1.27e-21	1.9912	0.321	0.141	3.97e-18	4
USP45	7.54e-49	1.96575	0.295	0.116	2.35e-45	4
SAMHD1	2.35e-16	1.92329	0.265	0.212	7.32e-13	4
AL354740.1	3.43e-31	1.88424	0.265	0.117	1.07e-27	4
SNHG14	6.33e-41	1.87198	0.276	0.12	1.97e-37	4
GATA3	3.54e-09	1.76778	0.291	0.276	1.1e-05	4
ARL10	4.49e-37	1.72374	0.282	0.101	1.4e-33	4
RUFY3	2.54e-41	1.69226	0.287	0.113	7.91e-38	4
SELENOM	5.79e-27	1.68283	0.268	0.149	1.81e-23	4
MAP3K14	3.78e-58	1.66519	0.357	0.122	1.18e-54	4
NCK2	1.35e-23	1.6255	0.295	0.157	4.21e-20	4
TGM5	1.9e-12	1.61726	0.265	0.136	5.93e-09	4
FKBP11	1.26e-15	1.60584	0.295	0.151	3.94e-12	4
ZNF408	7.65e-31	1.58602	0.272	0.114	2.38e-27	4
LINC02694	3.97e-30	1.57954	0.304	0.122	1.24e-26	4
RESF1	6.93e-17	1.57945	0.465	0.363	2.16e-13	4
TIMP1	3.83e-14	1.52862	0.463	0.302	1.19e-10	4
EZH1	3.93e-45	1.52814	0.316	0.106	1.22e-41	4
DNLZ	1.4e-32	1.50219	0.272	0.134	4.37e-29	4
TMEM91	2.09e-56	1.49468	0.344	0.099	6.52e-53	4
Z98884.1	1.83e-43	1.49041	0.27	0.098	5.71e-40	4
RBPJ	7.56e-14	1.47299	0.335	0.277	2.36e-10	4
SNRK-AS1	2.61e-29	1.45967	0.259	0.127	8.13e-26	4
CCL4	3.86e-08	1.45746	0.478	0.378	0.000120255	4
OSMR	3.11e-45	1.44978	0.251	0.078	9.69e-42	4
FOXB1	1.44e-27	1.42005	0.28	0.131	4.49e-24	4
LINC01871	2.06e-14	1.41871	0.535	0.381	6.42e-11	4
TNFRSF10D	1.47e-46	1.41703	0.278	0.103	4.57e-43	4
TP53INP1	2.51e-22	1.38517	0.28	0.112	7.83e-19	4
MISP3	2.7e-32	1.38207	0.251	0.135	8.42e-29	4
GLO1	9.66e-26	1.37618	0.58	0.378	3.01e-22	4
ZNF831	2.45e-14	1.36574	0.259	0.194	7.65e-11	4
RSRP1	6.9e-09	1.34541	0.353	0.293	2.15e-05	4
HSD3B7	4.52e-19	1.32244	0.263	0.157	1.41e-15	4
LINC01006	1.97e-23	1.31424	0.268	0.142	6.14e-20	4
RHOH	4.13e-09	1.31409	0.265	0.195	1.29e-05	4
PPM1L	1.14e-38	1.30873	0.268	0.109	3.55e-35	4
SLC46A3	7.79e-34	1.30366	0.312	0.115	2.43e-30	4
CCL5	4.7e-26	1.30361	0.675	0.477	1.46e-22	4
AC007114.1	2.73e-19	1.28757	0.268	0.128	8.51e-16	4
AC096992.2	8.71e-37	1.28414	0.302	0.149	2.72e-33	4
PATZ1	1.77e-15	1.28131	0.261	0.146	5.51e-12	4
CTBP1-AS	7.87e-21	1.269	0.261	0.087	2.45e-17	4
RBM26-AS1	3.56e-26	1.2678	0.284	0.157	1.11e-22	4
LINC00910	1.62e-19	1.23907	0.265	0.141	5.05e-16	4
FGFBP3	1.53e-20	1.23272	0.253	0.134	4.76e-17	4
RNF125	1.19e-06	1.21892	0.263	0.208	0.00370447	4
TGFB1	1.87e-06	1.21207	0.319	0.298	0.00583929	4
LRRN3	4.79e-13	1.20904	0.427	0.263	1.49e-09	4
LINC02591	1.56e-27	1.20748	0.268	0.126	4.88e-24	4
FTL	5.25e-11	1.20109	0.439	0.339	1.64e-07	4
YPEL3	1.05e-17	1.18287	0.493	0.338	3.27e-14	4
HEATR5A	1.45e-21	1.16952	0.285	0.151	4.52e-18	4
SRGN	3.18e-19	1.15952	0.546	0.379	9.91e-16	4
FOXP3	1.38e-53	1.14918	0.297	0.065	4.29e-50	4
RNF215	8.24e-45	1.12471	0.306	0.088	2.57e-41	4
CNTLN	3.14e-46	1.11996	0.276	0.08	9.8e-43	4
AC009113.1	3.17e-58	1.11211	0.384	0.131	9.9e-55	4
AC087239.1	7.86e-08	1.08334	0.261	0.151	0.000245129	4
TSC22D3	2.25e-06	1.08186	0.48	0.396	0.00700394	4
JUND	1.27e-09	1.08016	0.535	0.424	3.96e-06	4
SNHG22	4.56e-32	1.06987	0.265	0.116	1.42e-28	4
AC147651.4	1.45e-48	1.0579	0.293	0.099	4.51e-45	4
ZNF483	1.31e-29	1.04579	0.257	0.095	4.1e-26	4
DCAF8	2.5e-15	1.0227	0.278	0.153	7.8e-12	4
PDCD4	5.58e-11	1.00988	0.367	0.293	1.74e-07	4
SLC2A3	5.06e-22	1.00424	0.293	0.192	1.58e-18	4
TRAPPC6A	2.4e-08	0.970212	0.268	0.181	7.47e-05	4
CD37	7.1e-18	0.962202	0.518	0.369	2.22e-14	4
ABCF3	7.33e-17	0.946498	0.285	0.155	2.29e-13	4
ABCD1	1.77e-28	0.930811	0.261	0.162	5.53e-25	4
SORL1	2.69e-30	0.90926	0.323	0.165	8.39e-27	4
IPPK	2.45e-31	0.900011	0.357	0.163	7.63e-28	4
STK17B	6.4e-11	0.893659	0.543	0.403	2e-07	4
ITGB1	2.02e-08	0.878155	0.45	0.337	6.29e-05	4
C4orf48	1.12e-14	0.863164	0.369	0.283	3.49e-11	4
MACF1	3.46e-12	0.854167	0.348	0.292	1.08e-08	4
PMCH	2.76e-18	0.821835	0.285	0.164	8.61e-15	4
GBP5	4.48e-06	0.816547	0.282	0.262	0.0139833	4
HS3ST3B1	5.4e-54	0.801083	0.319	0.087	1.68e-50	4
PPP1R10	5.42e-24	0.797363	0.25	0.161	1.69e-20	4
FYB1	9.39e-06	0.79637	0.476	0.409	0.0292724	4
SLC29A3	1.43e-56	0.78503	0.38	0.144	4.46e-53	4
FCMR	2.89e-35	0.766992	0.301	0.121	9e-32	4
SLFN5	3.23e-17	0.762031	0.399	0.297	1.01e-13	4
TPT1	3.24e-17	0.745759	0.56	0.399	1.01e-13	4
AL118558.3	4.48e-18	0.745021	0.261	0.153	1.4e-14	4
SNAP23	7.14e-21	0.725689	0.272	0.15	2.23e-17	4
PRKCQ-AS1	1.32e-11	0.713401	0.299	0.249	4.12e-08	4
PINK1	3.03e-26	0.688005	0.251	0.12	9.45e-23	4
KCTD5	2.29e-30	0.666087	0.282	0.104	7.13e-27	4
ARID5B	2.89e-09	0.665851	0.291	0.23	9.01e-06	4
ERCC6	2.76e-34	0.659306	0.289	0.126	8.61e-31	4
RRAGB	4.54e-11	0.638288	0.306	0.166	1.41e-07	4
ZFP36L1	1.17e-17	0.596159	0.363	0.231	3.66e-14	4
PPP1R15A	8.49e-14	0.58427	0.473	0.334	2.65e-10	4
SLC4A7	8.42e-09	0.561319	0.335	0.276	2.62e-05	4
CKLF	4.14e-06	0.557825	0.518	0.426	0.0129046	4
ETS1	2.99e-10	0.548271	0.512	0.401	9.31e-07	4
CUL7	1.64e-22	0.535341	0.265	0.171	5.11e-19	4
CCDC122	2.23e-32	0.526132	0.293	0.127	6.96e-29	4
AC007383.2	4.98e-36	0.521969	0.255	0.121	1.55e-32	4
F2R	2.45e-11	0.516942	0.287	0.272	7.63e-08	4
ZSCAN26	1.02e-21	0.514923	0.255	0.136	3.18e-18	4
JRK	3.24e-25	0.511851	0.338	0.177	1.01e-21	4
PTPRCAP	9.83e-06	0.500261	0.484	0.396	0.0306397	4
BNIP3L	3.91e-14	0.50018	0.287	0.168	1.22e-10	4
EVI2B	1.77e-14	0.479569	0.418	0.343	5.53e-11	4
ARSK	4.41e-23	0.472906	0.287	0.151	1.37e-19	4
GPR108	9.14e-25	0.464787	0.278	0.157	2.85e-21	4
GLIPR1	6.11e-23	0.463592	0.439	0.327	1.9e-19	4
MBD5	9.95e-27	0.4562	0.302	0.13	3.1e-23	4
TC2N	1.85e-09	0.45522	0.461	0.378	5.77e-06	4
ARHGAP35	8.88e-19	0.454063	0.267	0.148	2.77e-15	4
CCND2	1.03e-16	0.449485	0.323	0.266	3.2e-13	4
AOPEP	7e-65	0.448765	0.323	0.088	2.18e-61	4
IL10RA	2.13e-14	0.445117	0.346	0.278	6.64e-11	4
CD2	1.24e-15	0.443966	0.56	0.42	3.87e-12	4
APRT	5.49e-06	0.435679	0.336	0.319	0.0171243	4
B2M	9.46e-15	0.423499	0.503	0.359	2.95e-11	4
TMEM150A	1.5e-35	0.42347	0.268	0.153	4.67e-32	4
EVL	5.34e-06	0.418852	0.473	0.397	0.016665	4
ZNF319	5.16e-36	0.399708	0.261	0.111	1.61e-32	4
IL7R	5.67e-19	0.395722	0.325	0.225	1.77e-15	4
CUL9	1.55e-38	0.384078	0.302	0.13	4.82e-35	4
EEF1A1	2.57e-10	0.344669	0.526	0.407	8e-07	4
GSTK1	4.25e-07	0.333349	0.454	0.35	0.00132581	4
CYTIP	1.31e-06	0.327673	0.359	0.295	0.004082	4
H1F0	5.02e-19	0.326034	0.257	0.13	1.56e-15	4
SELPLG	9.32e-07	0.324964	0.357	0.321	0.00290456	4
HLA-E	8.45e-07	0.30678	0.512	0.417	0.00263497	4
PNRC1	2.07e-17	0.301745	0.556	0.385	6.46e-14	4
PLAC8	3.1e-27	0.300917	0.259	0.096	9.67e-24	4
CUTA	3.46e-11	0.296443	0.422	0.327	1.08e-07	4
RPS28	7.69e-06	0.290073	0.446	0.367	0.0239727	4
FAM227B	3.99e-38	0.286236	0.302	0.113	1.24e-34	4
ITM2B	2.85e-07	0.283322	0.548	0.413	0.000887945	4
OTUD7A	1.81e-41	0.281917	0.259	0.087	5.63e-38	4
TAGAP	7.02e-08	-0.268027	0.304	0.257	0.000218881	4
VPS13C	2.26e-07	-0.27399	0.306	0.298	0.00070597	4
KIAA0825	1.88e-11	-0.291654	0.274	0.14	5.87e-08	4
ICAM3	1.52e-08	-0.331026	0.295	0.274	4.73e-05	4
LTB	8.12e-13	-0.385763	0.416	0.261	2.53e-09	4
RALA	2.1e-32	-0.422284	0.297	0.187	6.53e-29	4
FASTKD5	3.36e-25	-0.431179	0.312	0.126	1.05e-21	4
XBP1	1.55e-14	-0.460516	0.357	0.258	4.83e-11	4
APOL2	5.17e-28	-0.487918	0.25	0.121	1.61e-24	4
CD52	1.85e-13	-0.495645	0.439	0.312	5.78e-10	4
LAIR2	4.48e-24	-0.511475	0.304	0.15	1.4e-20	4
PRRC2B	2.65e-06	-0.519188	0.272	0.217	0.00825309	4
MAVS	2.13e-41	-0.521672	0.302	0.121	6.64e-38	4
RALY-AS1	4.87e-37	-0.539558	0.27	0.095	1.52e-33	4
TOGARAM1	2.88e-24	-0.650082	0.297	0.164	8.96e-21	4
ATM	6.97e-11	-0.65281	0.251	0.198	2.17e-07	4
AKTIP	5.27e-09	-0.671355	0.261	0.126	1.64e-05	4
CD74	2.37e-10	-0.671881	0.319	0.458	7.39e-07	4
ATP10D	5.73e-07	-0.742289	0.261	0.221	0.00178685	4
BHLHE40	2.62e-07	-0.752736	0.363	0.311	0.000817039	4
MALAT1	1.62e-35	-0.765281	0.592	0.363	5.06e-32	4
MXD4	3.85e-06	-0.778388	0.259	0.208	0.0119978	4
SLC5A3	1.15e-10	-0.829112	0.293	0.242	3.58e-07	4
TMSB10	5.38e-23	-0.860019	0.272	0.461	1.68e-19	4
DCTN3	6.83e-11	-0.865526	0.27	0.389	2.13e-07	4
TRAC	2.2e-15	-0.881708	0.403	0.343	6.86e-12	4
RPLP0	2.19e-09	-0.900932	0.365	0.475	6.84e-06	4
MIF	6.58e-07	-0.907743	0.376	0.462	0.0020519	4
FAM3A	3.61e-34	-0.928634	0.316	0.123	1.13e-30	4
ERO1B	1.16e-16	-0.94632	0.293	0.11	3.61e-13	4
RDH10	2.71e-07	-0.94771	0.412	0.313	0.000844224	4
FTH1	7.69e-07	-0.958531	0.338	0.278	0.00239829	4
ARHGAP12	6.3e-23	-0.981774	0.253	0.141	1.96e-19	4
GNPTAB	8.44e-16	-0.985299	0.319	0.247	2.63e-12	4
DAAM1	8.88e-22	-1.00467	0.276	0.137	2.77e-18	4
CEBPD	1.21e-12	-1.01556	0.251	0.261	3.77e-09	4
NKG7	6.21e-13	-1.03554	0.405	0.554	1.94e-09	4
PCMTD2	1.03e-07	-1.06472	0.259	0.133	0.000320071	4
PLIN2	8.57e-11	-1.06926	0.391	0.318	2.67e-07	4
ZNF354A	2.91e-41	-1.07876	0.316	0.157	9.07e-38	4
ITPR1	3.56e-21	-1.08619	0.251	0.139	1.11e-17	4
PPP2R5C	2.56e-06	-1.11722	0.291	0.3	0.00797618	4
PFN1	3.22e-17	-1.11796	0.329	0.51	1e-13	4
ACTG1	8.12e-07	-1.12244	0.361	0.455	0.00253043	4
UBB	5.13e-06	-1.12488	0.384	0.458	0.0160019	4
ITM2A	1.61e-12	-1.12889	0.272	0.43	5.02e-09	4
ANXA5	1.58e-08	-1.14927	0.333	0.455	4.93e-05	4
PPIA	1.61e-21	-1.15668	0.329	0.492	5.03e-18	4
NUCB2	9.62e-06	-1.1662	0.161	0.292	0.0299828	4
KLHL24	6.69e-26	-1.20824	0.306	0.151	2.09e-22	4
ZFAS1	7.63e-09	-1.21006	0.384	0.345	2.38e-05	4
RPS27L	1.05e-10	-1.28369	0.31	0.43	3.26e-07	4
PKM	2.38e-19	-1.28452	0.329	0.479	7.43e-16	4
NABP1	2.43e-22	-1.33962	0.325	0.123	7.57e-19	4
CFL1	2.76e-12	-1.34727	0.353	0.483	8.61e-09	4
LPAR6	2.63e-13	-1.35957	0.416	0.345	8.2e-10	4
IRF1	1.39e-05	-1.42904	0.323	0.299	0.0433266	4
ANXA2	5.37e-14	-1.44889	0.31	0.45	1.68e-10	4
TUBA4A	3.52e-10	-1.51076	0.217	0.339	1.1e-06	4
RAN	7.14e-23	-1.71776	0.28	0.473	2.23e-19	4
S100A10	6.27e-14	-1.72293	0.223	0.41	1.96e-10	4
ANP32B	3.26e-14	-1.74699	0.248	0.432	1.02e-10	4
PTPN22	7.52e-09	-1.77267	0.412	0.364	2.35e-05	4
GAPDH	1.65e-46	-1.77881	0.276	0.561	5.14e-43	4
P4HTM	4.2e-15	-1.78728	0.255	0.13	1.31e-11	4
HNRNPA2B1	3.79e-28	-1.84278	0.255	0.499	1.18e-24	4
NOB1	3.51e-32	-1.89306	0.265	0.129	1.1e-28	4
CTSW	1.16e-07	-2.07167	0.378	0.488	0.000361134	4
RAD21	1.26e-06	-2.27989	0.227	0.374	0.0039272	4
ACTB	5.05e-25	-2.36988	0.312	0.536	1.57e-21	4
CALM2	4.34e-12	-2.38626	0.299	0.457	1.35e-08	4
NEAT1	4.94e-23	-2.49387	0.348	0.263	1.54e-19	4
DEK	3.13e-14	-2.52261	0.28	0.449	9.75e-11	4
SMC2	1.37e-20	-2.52818	0.066	0.268	4.28e-17	4
MINDY3	2.92e-19	-2.55695	0.253	0.136	9.11e-16	4
JPT1	4.16e-09	-2.57572	0.206	0.372	1.3e-05	4
ANP32E	2.17e-09	-2.59934	0.147	0.368	6.76e-06	4
DCAF13	4.36e-21	-2.80711	0.253	0.142	1.36e-17	4
TXNIP	7.8e-23	-2.92009	0.48	0.309	2.43e-19	4
TXN	7.38e-06	-3.05133	0.348	0.423	0.0230085	4
LGALS3	3.7e-06	-3.05463	0.21	0.273	0.0115293	4
H2AFV	8.6e-36	-3.19103	0.206	0.469	2.68e-32	4
GSTP1	2.85e-10	-3.34354	0.329	0.464	8.87e-07	4
ZFP69B	1.97e-19	-3.44752	0.272	0.174	6.14e-16	4
NUCKS1	1.66e-12	-3.60383	0.204	0.377	5.19e-09	4
SMC4	4.93e-12	-3.60727	0.2	0.355	1.54e-08	4
VIM	2.93e-55	-3.74882	0.191	0.519	9.15e-52	4
CRIP1	2.8e-46	-3.99166	0.191	0.464	8.74e-43	4
HMGB1	1.11e-57	-4.20313	0.147	0.486	3.47e-54	4
GEM	6.41e-31	-4.23277	0.284	0.13	2e-27	4
GZMB	4.27e-36	-4.27223	0.274	0.545	1.33e-32	4
TMPO	2e-37	-4.60789	0.06	0.351	6.24e-34	4
H2AFX	1.18e-15	-4.6617	0.06	0.272	3.67e-12	4
CKS1B	4.46e-09	-4.75549	0.03	0.277	1.39e-05	4
CENPE	7.94e-15	-5.24172	0.04	0.257	2.48e-11	4
LGALS1	8.25e-23	-5.25486	0.189	0.428	2.57e-19	4
HIST2H2AC	1.59e-06	-5.37527	0.225	0.323	0.00497046	4
PTMA	3.66e-44	-5.39605	0.157	0.481	1.14e-40	4
DUT	4.17e-14	-5.56838	0.151	0.352	1.3e-10	4
SQSTM1	1.99e-19	-5.71185	0.446	0.291	6.2e-16	4
H2AFZ	2.88e-48	-5.76648	0.136	0.453	8.97e-45	4
UBE2S	2.07e-17	-5.80537	0.125	0.33	6.46e-14	4
CKS2	3.65e-21	-5.82722	0.102	0.305	1.14e-17	4
PTTG1	2.22e-25	-6.0654	0.155	0.394	6.93e-22	4
HMGB2	1.13e-47	-6.07227	0.098	0.422	3.53e-44	4
TPX2	4.36e-25	-6.11867	0.04	0.28	1.36e-21	4
TUBA1C	8.33e-08	-6.66173	0.115	0.288	0.000259715	4
TUBB4B	5.63e-25	-6.66981	0.138	0.342	1.76e-21	4
PCLAF	1.12e-15	-6.71297	0.042	0.282	3.48e-12	4
DLGAP5	7.48e-12	-6.751	0.011	0.25	2.33e-08	4
HIST1H1C	1.11e-08	-6.75586	0.202	0.371	3.46e-05	4
HMGN2	8.05e-67	-6.76884	0.068	0.458	2.51e-63	4
TYMS	3.85e-14	-7.4239	0.043	0.281	1.2e-10	4
NUSAP1	1.05e-23	-7.69821	0.06	0.337	3.26e-20	4
HIST1H1D	9.51e-19	-7.86893	0.164	0.348	2.97e-15	4
ARL6IP1	1.36e-10	-8.16526	0.225	0.383	4.23e-07	4
TUBB	5.53e-25	-8.39334	0.079	0.356	1.72e-21	4
HIST1H3D	9.96e-18	-8.41767	0.07	0.252	3.11e-14	4
HIST1H2AM	4.07e-08	-8.53787	0.076	0.272	0.000126977	4
HIST1H1E	1.33e-15	-8.70934	0.189	0.354	4.14e-12	4
ASPM	1.5e-18	-8.72516	0.008	0.267	4.68e-15	4
STMN1	7.26e-61	-8.91791	0.028	0.404	2.26e-57	4
MKI67	4.56e-58	-9.28643	0.043	0.374	1.42e-54	4
HIST1H1B	3.83e-14	-9.67619	0.032	0.257	1.19e-10	4
CENPF	1.74e-40	-9.98871	0.026	0.32	5.43e-37	4
TOP2A	2.25e-28	-10.607	0.015	0.304	7.01e-25	4
TUBA1B	1.33e-60	-11.1389	0.015	0.37	4.14e-57	4
HIST1H3B	7.18e-18	-11.6732	0.019	0.258	2.24e-14	4
HIST1H2AJ	6.01e-27	-12.0342	0.019	0.257	1.87e-23	4
HIST1H4C	1.17e-37	-12.0952	0.011	0.275	3.66e-34	4
HSPA5	2.44e-60	5.18534	0.696	0.38	7.6e-57	5
METTL1	8.43e-15	3.8209	0.279	0.033	2.63e-11	5
HSP90B1	5.86e-54	3.49373	0.731	0.403	1.83e-50	5
PTMS	2.01e-31	3.40191	0.525	0.307	6.26e-28	5
AC069431.1	1.9e-49	3.2983	0.362	0.072	5.93e-46	5
ZNF790-AS1	3.43e-31	3.23182	0.342	0.085	1.07e-27	5
MED18	4.76e-09	3.21108	0.262	0.135	1.48e-05	5
RASSF1-AS1	9.99e-80	3.14058	0.435	0.027	3.12e-76	5
RDH14	6.15e-45	3.10601	0.308	0.119	1.92e-41	5
EEF1AKMT4	9.28e-37	3.05656	0.29	0.065	2.89e-33	5
LGALS1	9.85e-192	2.90514	0.971	0.35	3.07e-188	5
CCDC86	2.81e-14	2.8781	0.269	0.089	8.76e-11	5
AC253572.2	4.02e-37	2.83134	0.331	0.089	1.25e-33	5
AC084018.2	3.03e-29	2.80432	0.256	0.039	9.46e-26	5
CLEC11A	3.88e-81	2.72704	0.456	0.087	1.21e-77	5
FBXO36	4.08e-43	2.61668	0.331	0.061	1.27e-39	5
CRELD1	7.68e-55	2.5878	0.369	0.093	2.39e-51	5
AC092164.1	1.03e-41	2.50775	0.346	0.06	3.22e-38	5
CFL1	2.08e-25	2.48174	0.671	0.451	6.47e-22	5
PTTG1	4.77e-42	2.45973	0.629	0.346	1.49e-38	5
AC004477.1	1.59e-29	2.43009	0.269	0.069	4.96e-26	5
CDK2AP2	2.95e-32	2.40769	0.6	0.382	9.2e-29	5
Z82206.1	4.21e-30	2.33503	0.3	0.062	1.31e-26	5
C1R	7.79e-31	2.30555	0.292	0.035	2.43e-27	5
DGCR2	5.15e-12	2.27469	0.269	0.132	1.6e-08	5
TROAP	1.85e-16	2.25081	0.369	0.126	5.77e-13	5
ZNF585B	4.83e-21	2.21795	0.267	0.06	1.51e-17	5
HIST3H2A	1.8e-39	2.18209	0.327	0.124	5.61e-36	5
AC074117.1	2.83e-25	2.17127	0.292	0.052	8.83e-22	5
AL024507.2	5.46e-34	2.17053	0.267	0.07	1.7e-30	5
LINC02273	6.36e-14	2.16582	0.281	0.059	1.98e-10	5
TMEM191B	6.11e-48	2.15358	0.338	0.037	1.91e-44	5
AL139089.1	1.05e-34	2.11888	0.296	0.085	3.27e-31	5
DVL1	9.01e-38	2.10354	0.329	0.101	2.81e-34	5
AC104596.1	2.99e-16	2.10142	0.317	0.105	9.34e-13	5
ACTB	1.17e-62	2.08856	0.815	0.485	3.65e-59	5
IER5L	8.63e-57	2.05129	0.394	0.096	2.69e-53	5
LINC00526	1.82e-28	2.05118	0.367	0.166	5.69e-25	5
PRAG1	3.33e-27	2.04329	0.331	0.127	1.04e-23	5
AL354696.2	8.37e-17	2.04129	0.373	0.175	2.61e-13	5
SPRED2	4.72e-18	2.02257	0.26	0.047	1.47e-14	5
AC016727.1	4.59e-11	2.00322	0.283	0.156	1.43e-07	5
HTD2	2.13e-19	1.99928	0.306	0.107	6.64e-16	5
PGK1	7.8e-07	1.93159	0.515	0.407	0.0024331	5
TAFA2	6.08e-07	1.92827	0.256	0.107	0.00189694	5
SLC22A5	9.58e-39	1.91955	0.377	0.123	2.99e-35	5
ZNF121	5.77e-50	1.91952	0.365	0.093	1.8e-46	5
MEF2B	1.54e-26	1.9115	0.25	0.081	4.79e-23	5
RPF2	6.79e-25	1.90742	0.265	0.109	2.12e-21	5
AC023157.3	3.95e-25	1.89606	0.365	0.11	1.23e-21	5
AC022182.2	9.65e-28	1.87068	0.285	0.068	3.01e-24	5
AL118558.3	8.74e-39	1.86382	0.394	0.141	2.73e-35	5
NAGLU	4.36e-37	1.84671	0.296	0.094	1.36e-33	5
ITGB1-DT	1.4e-58	1.83979	0.348	0.032	4.36e-55	5
FARP1	1.03e-14	1.80465	0.308	0.179	3.21e-11	5
AC013400.1	1.18e-14	1.79622	0.273	0.088	3.67e-11	5
ZFP3	1.88e-57	1.77828	0.269	0.045	5.87e-54	5
KLRD1	4.5e-41	1.70778	0.262	0.057	1.4e-37	5
AGPAT4	3.55e-39	1.70171	0.319	0.093	1.11e-35	5
TWNK	4.99e-19	1.69509	0.262	0.124	1.55e-15	5
AC064807.1	5.21e-10	1.67605	0.26	0.115	1.62e-06	5
AC022916.1	3.11e-30	1.66743	0.369	0.141	9.7e-27	5
AC091271.1	5.58e-38	1.62049	0.344	0.099	1.74e-34	5
CCDC174	4.75e-35	1.61708	0.392	0.166	1.48e-31	5
AL109628.2	3.85e-26	1.61148	0.267	0.101	1.2e-22	5
CDC20	5.31e-18	1.59023	0.36	0.15	1.65e-14	5
TMEM244	1.2e-34	1.58329	0.358	0.125	3.73e-31	5
LINC00265	6.95e-08	1.55498	0.302	0.147	0.000216783	5
LINC01089	3.21e-33	1.54575	0.417	0.141	1e-29	5
AC109454.2	2.55e-11	1.53324	0.283	0.104	7.96e-08	5
AL590705.1	4.72e-15	1.52244	0.327	0.195	1.47e-11	5
IMPACT	4.2e-25	1.52162	0.4	0.161	1.31e-21	5
CXorf38	2.54e-26	1.51382	0.338	0.137	7.91e-23	5
AGBL3	1.32e-18	1.50054	0.285	0.115	4.13e-15	5
TMSB4X	2.1e-90	1.47707	0.81	0.381	6.54e-87	5
AC083949.1	2.59e-41	1.45946	0.315	0.057	8.06e-38	5
USP40	3.19e-24	1.42201	0.294	0.139	9.94e-21	5
ZSCAN5A	3.49e-10	1.41871	0.279	0.136	1.09e-06	5
AL157394.3	1.03e-24	1.4103	0.258	0.12	3.21e-21	5
AC093673.1	3.2e-57	1.40828	0.44	0.107	9.99e-54	5
AC096992.2	4.12e-30	1.38593	0.358	0.145	1.28e-26	5
AC068338.2	3.92e-18	1.37784	0.275	0.083	1.22e-14	5
NDST2	5.09e-27	1.37603	0.279	0.128	1.59e-23	5
CALR	2.67e-27	1.376	0.64	0.395	8.34e-24	5
PPIB	2.62e-22	1.36256	0.606	0.408	8.16e-19	5
JRK	8.13e-07	1.36028	0.304	0.181	0.0025362	5
ANKDD1A	3.82e-51	1.35864	0.367	0.073	1.19e-47	5
SMPDL3A	5.66e-09	1.35507	0.271	0.097	1.76e-05	5
AC108047.1	9.82e-29	1.33578	0.304	0.091	3.06e-25	5
TIMM44	3.85e-31	1.32769	0.292	0.109	1.2e-27	5
HNRNPA2B1	1.18e-58	1.32478	0.779	0.446	3.67e-55	5
LINC00294	6.04e-43	1.30992	0.417	0.12	1.88e-39	5
FOXN3-AS1	5.76e-40	1.30866	0.421	0.154	1.79e-36	5
TMSB10	2.4e-35	1.30405	0.65	0.422	7.49e-32	5
OLAH	5.07e-49	1.27466	0.362	0.059	1.58e-45	5
AL353622.1	3.57e-30	1.2688	0.285	0.089	1.11e-26	5
AGBL2	1.05e-16	1.26796	0.267	0.056	3.27e-13	5
UBAC2-AS1	3.67e-11	1.25957	0.321	0.126	1.14e-07	5
ANXA2	1.49e-36	1.20518	0.692	0.412	4.64e-33	5
EML2-AS1	2.34e-14	1.20369	0.319	0.134	7.29e-11	5
AC138150.1	1.08e-25	1.19265	0.325	0.115	3.37e-22	5
ERMN	6.12e-38	1.18131	0.323	0.091	1.91e-34	5
LDHA	2.5e-08	1.16763	0.496	0.358	7.8e-05	5
FLVCR2	1.53e-16	1.13655	0.273	0.085	4.78e-13	5
AL590399.1	3.28e-24	1.13132	0.298	0.091	1.02e-20	5
TRIM62	9.62e-34	1.12543	0.348	0.112	3e-30	5
DCTN3	4.13e-08	1.10094	0.494	0.366	0.000128736	5
PKM	1.97e-16	1.0899	0.621	0.449	6.13e-13	5
IFITM1	2.11e-33	1.08487	0.621	0.386	6.57e-30	5
SETD6	4.95e-23	1.05011	0.277	0.106	1.54e-19	5
CUL7	6.02e-53	1.04889	0.46	0.153	1.88e-49	5
AP002807.1	1.17e-13	1.03031	0.25	0.169	3.66e-10	5
MKLN1-AS	5.62e-26	1.00672	0.319	0.151	1.75e-22	5
AP000766.1	3.05e-50	0.996095	0.421	0.101	9.52e-47	5
ZNF589	3.33e-20	0.972607	0.256	0.133	1.04e-16	5
EARS2	7.7e-29	0.962611	0.267	0.081	2.4e-25	5
DYNLL1	1.48e-10	0.959264	0.54	0.399	4.61e-07	5
SLC16A6	3.72e-34	0.957607	0.298	0.101	1.16e-30	5
DDX21	1.44e-11	0.939852	0.344	0.202	4.48e-08	5
BCAR3	7.62e-24	0.939792	0.271	0.126	2.38e-20	5
MTMR8	5.12e-19	0.937015	0.3	0.161	1.6e-15	5
VIM	2.2e-60	0.916973	0.838	0.454	6.85e-57	5
DZANK1	7.03e-33	0.913681	0.379	0.159	2.19e-29	5
ACTG1	1.61e-37	0.885473	0.679	0.423	5.01e-34	5
S100A10	1.69e-26	0.868213	0.598	0.372	5.28e-23	5
AL121603.2	3.87e-17	0.855847	0.294	0.132	1.21e-13	5
PEX5	1.19e-38	0.807408	0.319	0.129	3.7e-35	5
PLP2	2.26e-07	0.806261	0.465	0.348	0.000703339	5
ZNF517	3.48e-27	0.793986	0.254	0.086	1.09e-23	5
RHBDF2	1.51e-11	0.774791	0.277	0.123	4.72e-08	5
SERPINE1	3.14e-17	0.764234	0.285	0.117	9.78e-14	5
PFN1	4.26e-31	0.755537	0.715	0.471	1.33e-27	5
MROH6	3.12e-25	0.743829	0.275	0.054	9.73e-22	5
ANXA1	5.54e-13	0.727165	0.61	0.45	1.73e-09	5
YTHDF3-AS1	4.88e-28	0.724672	0.292	0.061	1.52e-24	5
AC067852.2	7.65e-36	0.709032	0.288	0.086	2.39e-32	5
LINC01431	4.74e-27	0.706925	0.346	0.145	1.48e-23	5
FAIM	3.59e-19	0.704368	0.29	0.155	1.12e-15	5
CANX	3.05e-07	0.701958	0.45	0.352	0.000950236	5
IGHV1-3	1.92e-38	0.695072	0.354	0.139	5.98e-35	5
WDR91	8.12e-32	0.692814	0.277	0.124	2.53e-28	5
AC246817.2	7.55e-23	0.667885	0.279	0.089	2.35e-19	5
IL5RA	1.28e-19	0.665692	0.315	0.132	3.98e-16	5
P2RY14	1.69e-48	0.646931	0.379	0.111	5.28e-45	5
ZNF316	8.49e-16	0.646737	0.277	0.145	2.65e-12	5
GAPDH	4.66e-41	0.640729	0.796	0.509	1.45e-37	5
MT1E	7.79e-07	0.616275	0.252	0.191	0.00242782	5
REEP5	1.03e-05	0.614543	0.331	0.376	0.0322276	5
AC005041.5	7.21e-33	0.614252	0.294	0.064	2.25e-29	5
SNAPC4	4.51e-24	0.614152	0.352	0.13	1.41e-20	5
AC008966.1	2.41e-15	0.588883	0.279	0.142	7.5e-12	5
ADCY3	5.17e-36	0.586974	0.3	0.089	1.61e-32	5
L3MBTL1	4.42e-18	0.565788	0.275	0.084	1.38e-14	5
SFPQ	1.52e-08	0.563982	0.521	0.395	4.75e-05	5
LINC00954	2.24e-19	0.558168	0.338	0.132	6.97e-16	5
ZCWPW1	3.43e-14	0.549364	0.288	0.183	1.07e-10	5
SLC25A15	2.68e-22	0.54052	0.29	0.099	8.35e-19	5
AC243960.1	4.48e-24	0.537374	0.377	0.248	1.4e-20	5
RAN	4.36e-14	0.537267	0.581	0.442	1.36e-10	5
AC025164.1	1.55e-41	0.51161	0.298	0.105	4.82e-38	5
AC127521.1	4.32e-27	0.485068	0.256	0.105	1.35e-23	5
GPR63	3.75e-21	0.483915	0.277	0.154	1.17e-17	5
RPLP0	8.5e-09	0.460137	0.571	0.454	2.65e-05	5
LINC00158	2.23e-28	0.449041	0.335	0.12	6.95e-25	5
PDIA3	1e-16	0.441642	0.594	0.411	3.12e-13	5
C20orf194	1.46e-05	0.43692	0.26	0.181	0.0454028	5
AL022157.1	2.87e-33	0.430229	0.277	0.084	8.95e-30	5
ZNF461	1.19e-16	0.426443	0.277	0.104	3.71e-13	5
INTS6-AS1	5.9e-19	0.389653	0.356	0.141	1.84e-15	5
LRRC61	4.42e-22	0.383615	0.321	0.134	1.38e-18	5
CD99	1.99e-09	0.382354	0.585	0.477	6.22e-06	5
PCBP3	1.17e-38	0.336111	0.283	0.037	3.66e-35	5
FBXW9	8.23e-11	0.307955	0.285	0.152	2.56e-07	5
ANXA5	9.99e-10	0.301805	0.56	0.431	3.12e-06	5
SRSF7	1.57e-05	0.264272	0.412	0.348	0.049	5
ZNF717	3.51e-38	-0.278732	0.298	0.112	1.09e-34	5
SELENOO	5.9e-29	-0.301855	0.331	0.152	1.84e-25	5
RNF123	2.59e-54	-0.378494	0.385	0.096	8.08e-51	5
CDKN3	1.21e-10	-0.384081	0.327	0.201	3.77e-07	5
ATR	8.95e-26	-0.414767	0.29	0.133	2.79e-22	5
POLM	4.47e-23	-0.415095	0.271	0.106	1.39e-19	5
IL18RAP	2.45e-13	-0.425389	0.292	0.152	7.65e-10	5
BIRC5	2.24e-12	-0.44381	0.352	0.185	6.98e-09	5
IL7	3.59e-19	-0.449408	0.273	0.146	1.12e-15	5
TPT1	3.77e-06	-0.581522	0.319	0.423	0.0117558	5
KIF14	5.67e-25	-0.582821	0.277	0.144	1.77e-21	5
VPS18	2.71e-20	-0.596424	0.292	0.15	8.45e-17	5
CUTA	5.68e-08	-0.615495	0.246	0.345	0.000177219	5
XKR6	4.56e-23	-0.664238	0.285	0.153	1.42e-19	5
ZNF613	1.93e-19	-0.686627	0.258	0.122	6.02e-16	5
HSF2	1.02e-10	-0.712846	0.273	0.173	3.19e-07	5
FABP5	6.12e-07	-0.763346	0.348	0.265	0.00190722	5
HMGB2	6.91e-17	-0.768434	0.579	0.373	2.15e-13	5
UBB	1.31e-05	-0.840701	0.367	0.459	0.0407368	5
B4GAT1	8.54e-21	-0.84926	0.294	0.144	2.66e-17	5
LIMD2	7.25e-09	-0.85592	0.306	0.422	2.26e-05	5
BIVM	2.14e-37	-0.874159	0.398	0.168	6.68e-34	5
EVL	2.42e-06	-0.883485	0.308	0.413	0.00753127	5
AFTPH	1.89e-26	-0.904567	0.298	0.137	5.88e-23	5
GLO1	1.52e-08	-0.930991	0.285	0.409	4.72e-05	5
TRIM34	1.55e-45	-0.943436	0.39	0.143	4.83e-42	5
CKLF	3.02e-07	-1.02163	0.335	0.445	0.000940975	5
TBC1D10C	3.69e-06	-1.09789	0.204	0.284	0.0114985	5
PTPRCAP	6.97e-07	-1.09842	0.304	0.414	0.00217391	5
TNFSF14	1.32e-21	-1.11217	0.258	0.116	4.12e-18	5
IL32	6.99e-08	-1.1586	0.235	0.35	0.000217992	5
LINC02611	2.21e-06	-1.20653	0.267	0.175	0.00690181	5
HMGB1	4.91e-27	-1.22687	0.71	0.428	1.53e-23	5
DNLZ	7.03e-26	-1.26415	0.292	0.133	2.19e-22	5
MYADM	5.72e-08	-1.29614	0.288	0.331	0.000178379	5
HMGB3	8.51e-10	-1.29665	0.319	0.179	2.65e-06	5
LY9	6.04e-34	-1.33435	0.275	0.14	1.88e-30	5
AHNAK	1.06e-08	-1.39857	0.304	0.407	3.31e-05	5
RESF1	2.13e-26	-1.40297	0.246	0.385	6.64e-23	5
NBPF3	1.13e-19	-1.43707	0.252	0.135	3.53e-16	5
APOBEC3B	1.01e-07	-1.4576	0.306	0.189	0.000315842	5
LINC01871	3.66e-09	-1.49086	0.281	0.407	1.14e-05	5
CD2	5.78e-13	-1.49152	0.329	0.444	1.8e-09	5
BTG1	5.37e-13	-1.51275	0.227	0.378	1.67e-09	5
H2AFZ	3.47e-07	-1.52566	0.537	0.412	0.0010805	5
MACF1	2.93e-06	-1.52914	0.162	0.311	0.00912093	5
DYRK1B	1.62e-20	-1.53256	0.254	0.094	5.07e-17	5
CEACAM21	1.39e-26	-1.5483	0.312	0.146	4.35e-23	5
ODC1	2.43e-12	-1.5847	0.273	0.184	7.59e-09	5
SERPINB1	1.98e-07	-1.59008	0.258	0.359	0.00061853	5
GSAP	4.21e-23	-1.62041	0.285	0.158	1.31e-19	5
SLC4A7	3.44e-07	-1.66294	0.171	0.293	0.00107121	5
UCP2	1.28e-17	-1.67841	0.212	0.357	3.99e-14	5
MKI67	1.68e-26	-1.71318	0.558	0.321	5.24e-23	5
DDX43	3.43e-24	-1.75192	0.271	0.155	1.07e-20	5
RCBTB2	8.09e-06	-1.77182	0.294	0.244	0.0252175	5
CALM2	1.31e-10	-1.83698	0.338	0.451	4.08e-07	5
NKG7	6.22e-12	-1.85376	0.394	0.554	1.94e-08	5
IL16	4.07e-07	-1.87821	0.317	0.322	0.00126831	5
GNLY	4.03e-13	-1.87902	0.229	0.403	1.26e-09	5
DLGAP5	1.28e-15	-1.89487	0.342	0.216	3.98e-12	5
PNRC1	9.6e-26	-1.94156	0.219	0.419	2.99e-22	5
ASAH1	1.14e-26	-1.94669	0.258	0.137	3.57e-23	5
RABGAP1L	1.63e-16	-2.02784	0.144	0.252	5.09e-13	5
ABHD13	8.11e-25	-2.03268	0.265	0.111	2.53e-21	5
IKZF3	8.5e-11	-2.03621	0.29	0.191	2.65e-07	5
CCNB2	8.03e-06	-2.14273	0.29	0.176	0.0250505	5
VNN2	7.38e-33	-2.17235	0.333	0.14	2.3e-29	5
ZNF507	3.65e-15	-2.18391	0.277	0.134	1.14e-11	5
DENND6B	3.83e-35	-2.27535	0.317	0.134	1.2e-31	5
CD52	6.81e-09	-2.42343	0.202	0.336	2.12e-05	5
MICAL1	2.02e-25	-2.49405	0.302	0.138	6.3e-22	5
TPX2	9.11e-10	-2.5093	0.327	0.25	2.84e-06	5
PLCXD2	1.03e-30	-2.53772	0.342	0.15	3.23e-27	5
CST7	5.46e-28	-2.56269	0.246	0.481	1.7e-24	5
ASPM	3.02e-09	-2.56458	0.29	0.238	9.41e-06	5
PTMA	1.41e-23	-2.68835	0.717	0.424	4.39e-20	5
CCDC22	5.58e-37	-2.73056	0.285	0.113	1.74e-33	5
HPGD	1.07e-07	-2.83257	0.221	0.316	0.000332118	5
LTA	1.15e-11	-2.83584	0.252	0.135	3.58e-08	5
UBC	5.76e-12	-2.99312	0.271	0.431	1.8e-08	5
RNF213	2.94e-14	-3.01225	0.288	0.425	9.18e-11	5
SYNE2	4.7e-12	-3.30901	0.173	0.344	1.46e-08	5
PCNA	1.04e-05	-3.42755	0.152	0.265	0.032574	5
STMN1	1.11e-31	-3.76494	0.681	0.338	3.47e-28	5
C15orf48	5.26e-19	-3.80303	0.258	0.132	1.64e-15	5
CKAP2	2.57e-10	-3.86867	0.177	0.266	8.02e-07	5
TTN	1.4e-08	-4.11981	0.079	0.253	4.37e-05	5
NEAT1	1.16e-19	-4.2406	0.19	0.279	3.62e-16	5
CD69	5.62e-11	-4.50723	0.258	0.388	1.75e-07	5
DUT	6.09e-08	-4.5642	0.242	0.341	0.000189756	5
MALAT1	4.76e-146	-5.08766	0.073	0.415	1.48e-142	5
PLIN2	8.53e-11	-5.21379	0.242	0.333	2.66e-07	5
FTL	3.7e-15	-5.32779	0.21	0.362	1.15e-11	5
AL627171.2	9.05e-13	-5.59087	0.208	0.321	2.82e-09	5
PCLAF	2.89e-18	-5.75813	0.179	0.266	9.02e-15	5
CENPF	6.48e-27	-5.78205	0.496	0.272	2.02e-23	5
CCL5	2.01e-53	-6.17961	0.204	0.524	6.27e-50	5
TUBB	2.87e-08	-6.33094	0.227	0.339	8.96e-05	5
MCPH1-AS1	1.85e-43	-6.69218	0.294	0.051	5.77e-40	5
NUSAP1	1.8e-16	-6.94351	0.169	0.324	5.63e-13	5
SQSTM1	5.38e-21	-6.95735	0.15	0.321	1.68e-17	5
TYMS	1.33e-27	-7.00088	0.148	0.268	4.13e-24	5
HIST1H1E	6.86e-08	-8.24678	0.24	0.347	0.000213789	5
HIST1H3D	1.04e-08	-8.78097	0.04	0.254	3.26e-05	5
HIST1H4C	1.04e-10	-9.3498	0.083	0.266	3.25e-07	5
HIST1H1B	2.26e-12	-10.9325	0.071	0.251	7.04e-09	5
HIST1H3B	1.68e-12	-11.5145	0.048	0.253	5.23e-09	5
HIST1H2AJ	7.3e-39	-12.0003	0.04	0.252	2.28e-35	5
FEN1	3.95e-12	6.34532	0.515	0.116	1.23e-08	6
GINS2	9.19e-26	6.22313	0.569	0.086	2.87e-22	6
MCM5	2.37e-43	5.44927	0.629	0.135	7.38e-40	6
RPL22L1	1.51e-12	5.09367	0.431	0.223	4.72e-09	6
HNRNPAB	2.16e-41	4.93711	0.645	0.229	6.74e-38	6
MCM4	2.5e-39	4.86071	0.612	0.13	7.78e-36	6
UNG	1.65e-18	4.61942	0.496	0.093	5.16e-15	6
MCM7	1.71e-53	4.5529	0.659	0.12	5.34e-50	6
FABP5	2.28e-23	4.51331	0.602	0.249	7.12e-20	6
ATAD2	2.14e-25	4.36214	0.547	0.18	6.66e-22	6
TXNRD3	1.57e-05	3.6189	0.371	0.037	0.0489865	6
SLBP	9.6e-26	3.60509	0.596	0.168	2.99e-22	6
PDIA6	1.21e-24	3.5852	0.664	0.383	3.79e-21	6
DHFR	1.12e-50	3.5698	0.656	0.162	3.5e-47	6
HELLS	8.74e-48	3.44066	0.699	0.17	2.73e-44	6
HSP90AB1	2.55e-29	3.38083	0.64	0.389	7.95e-26	6
DUT	5.57e-81	3.34782	0.81	0.298	1.74e-77	6
PEG10	1.62e-23	3.33508	0.528	0.13	5.07e-20	6
ARHGEF19	9.83e-14	3.23273	0.442	0.085	3.07e-10	6
MCM3	1.16e-56	3.20998	0.664	0.161	3.63e-53	6
TK1	3.94e-20	3.1112	0.558	0.14	1.23e-16	6
AGMAT	5e-08	3.03086	0.423	0.058	0.000155989	6
ZWINT	4.18e-06	2.99167	0.428	0.147	0.0130462	6
RRM2	7.1e-20	2.98668	0.542	0.201	2.21e-16	6
CLSPN	4.94e-37	2.9827	0.618	0.121	1.54e-33	6
KLF5	2.98e-06	2.89031	0.434	0.056	0.00929307	6
CYP51A1	7.65e-13	2.81113	0.447	0.189	2.38e-09	6
BIK	3.39e-09	2.78154	0.393	0.063	1.06e-05	6
CHCHD10	2.63e-09	2.76334	0.355	0.149	8.21e-06	6
IL17RB	1.32e-18	2.6721	0.412	0.062	4.11e-15	6
SNHG3	2.57e-19	2.65937	0.385	0.096	8.02e-16	6
ZNF670	7.64e-16	2.59005	0.461	0.071	2.38e-12	6
CENPU	2.51e-17	2.56586	0.569	0.167	7.84e-14	6
CLEC12A	2.94e-18	2.54184	0.436	0.041	9.18e-15	6
ASAH2B	5.63e-27	2.54111	0.509	0.048	1.75e-23	6
LINC02610	1.49e-12	2.50353	0.428	0.051	4.66e-09	6
NASP	6e-36	2.47228	0.688	0.25	1.87e-32	6
SLC35G1	4.52e-06	2.45396	0.26	0.091	0.0141048	6
OLMALINC	2.4e-16	2.45366	0.458	0.053	7.49e-13	6
HSPA8	1.12e-28	2.35218	0.672	0.428	3.48e-25	6
CXCL8	2.19e-11	2.34966	0.415	0.087	6.83e-08	6
ALYREF	1.73e-10	2.34832	0.585	0.302	5.38e-07	6
COQ5	1.61e-11	2.34025	0.328	0.136	5.02e-08	6
RBBP4	9.76e-21	2.33739	0.61	0.32	3.04e-17	6
ACOT4	1.22e-11	2.32362	0.417	0.025	3.81e-08	6
RADX	8.46e-06	2.29891	0.431	0.137	0.0263933	6
PCLAF	1.27e-53	2.26155	0.743	0.224	3.95e-50	6
IGFBP3	1.94e-15	2.25611	0.455	0.153	6.04e-12	6
AL137856.1	3.7e-08	2.2003	0.404	0.063	0.000115223	6
MAP3K9	4.83e-07	2.14325	0.463	0.098	0.00150476	6
HOMER2	3.04e-31	2.01781	0.534	0.078	9.48e-28	6
GZMB	1.72e-19	1.94143	0.705	0.505	5.37e-16	6
JAZF1	4.81e-25	1.93597	0.431	0.043	1.5e-21	6
AC105339.6	4.72e-08	1.91941	0.398	0.031	0.000147206	6
DNAJC3-DT	2.08e-11	1.87454	0.388	0.084	6.48e-08	6
NCL	1.89e-23	1.86116	0.672	0.428	5.88e-20	6
TGIF1	7.41e-07	1.74671	0.309	0.131	0.00230931	6
PDCD1LG2	2.53e-20	1.73719	0.469	0.09	7.89e-17	6
IQCH-AS1	4.35e-08	1.71368	0.255	0.124	0.000135582	6
LRRC34	1.01e-11	1.70903	0.393	0.121	3.15e-08	6
PHKA1	3.26e-10	1.66052	0.36	0.07	1.02e-06	6
MIF	3.46e-19	1.63566	0.659	0.439	1.08e-15	6
RRM1	7.09e-09	1.60234	0.447	0.15	2.21e-05	6
ZNF567	2.51e-18	1.57852	0.428	0.124	7.81e-15	6
SPNS3	6.82e-26	1.55953	0.401	0.116	2.13e-22	6
SUPT16H	2.4e-09	1.55492	0.556	0.269	7.48e-06	6
ZCCHC14	2.09e-13	1.54735	0.404	0.051	6.51e-10	6
ZBTB26	7.35e-07	1.52938	0.409	0.086	0.00229316	6
SLC2A1-AS1	1.33e-07	1.4957	0.477	0.134	0.00041525	6
NME2	3.7e-21	1.43783	0.626	0.388	1.15e-17	6
LINC02195	3.06e-08	1.43402	0.336	0.06	9.55e-05	6
KLRC2	1.26e-46	1.43019	0.553	0.093	3.93e-43	6
RMDN2	1.26e-24	1.40962	0.539	0.139	3.94e-21	6
EML2-AS1	4.34e-15	1.40742	0.444	0.129	1.35e-11	6
AC142472.1	3.52e-12	1.40373	0.404	0.074	1.1e-08	6
ZNF140	9.17e-08	1.3958	0.293	0.127	0.000285927	6
RANBP1	9.56e-14	1.384	0.583	0.26	2.98e-10	6
SLC4A7	3.43e-14	1.38266	0.252	0.284	1.07e-10	6
DMTN	2.67e-28	1.3782	0.491	0.126	8.33e-25	6
SIVA1	1.57e-18	1.3711	0.599	0.257	4.9e-15	6
GRAMD1A	6.88e-12	1.37064	0.257	0.131	2.15e-08	6
LINC00892	4.14e-14	1.35601	0.539	0.265	1.29e-10	6
MFSD13A	3.5e-09	1.33263	0.417	0.146	1.09e-05	6
EARS2	5.99e-24	1.32547	0.455	0.071	1.87e-20	6
PKM	2.01e-12	1.31172	0.612	0.454	6.27e-09	6
TPI1	7.79e-20	1.30898	0.642	0.439	2.43e-16	6
CCRL2	7.49e-13	1.26886	0.469	0.167	2.34e-09	6
ENO1	1.32e-10	1.25905	0.629	0.471	4.13e-07	6
LINC01237	5.09e-11	1.24901	0.415	0.068	1.59e-07	6
RAN	1e-19	1.23394	0.661	0.439	3.13e-16	6
SLC18B1	3.8e-25	1.23053	0.463	0.104	1.19e-21	6
PPIA	5.59e-32	1.20777	0.71	0.46	1.74e-28	6
HLA-DPA1	1.65e-09	1.17672	0.58	0.438	5.16e-06	6
ATP11A	1.71e-10	1.17246	0.36	0.113	5.33e-07	6
GAPDH	1.14e-34	1.16984	0.78	0.516	3.56e-31	6
AC064836.4	2.29e-16	1.16041	0.482	0.153	7.14e-13	6
AL138895.1	8.36e-20	1.15844	0.444	0.023	2.61e-16	6
PPP1R14B	2.55e-06	1.15483	0.322	0.144	0.00795287	6
ADCK1	7.94e-08	1.14029	0.388	0.097	0.000247717	6
HCFC2	3.16e-16	1.12703	0.331	0.111	9.85e-13	6
NR2F6	1.92e-16	1.08445	0.374	0.124	5.99e-13	6
LINC02446	2.89e-14	1.07887	0.396	0.119	9e-11	6
GMDS	3.28e-14	1.03998	0.304	0.094	1.02e-10	6
GSN	4.2e-41	1.00812	0.518	0.071	1.31e-37	6
EIF4A1	2.03e-07	0.988662	0.553	0.392	0.000631427	6
RFNG	5.16e-14	0.959666	0.366	0.117	1.61e-10	6
PACRGL	2.98e-13	0.95865	0.382	0.116	9.31e-10	6
DEK	3.2e-34	0.957094	0.743	0.41	9.99e-31	6
HSP90AA1	4.19e-34	0.901476	0.721	0.439	1.31e-30	6
MNT	1.47e-35	0.893734	0.512	0.072	4.58e-32	6
F2RL2	2.47e-14	0.890986	0.485	0.113	7.71e-11	6
RUFY3	6.7e-09	0.890078	0.309	0.117	2.09e-05	6
TYMS	6.3e-46	0.866264	0.724	0.224	1.96e-42	6
BX537318.1	8.37e-20	0.865371	0.444	0.046	2.61e-16	6
Z98884.1	1.31e-07	0.857566	0.382	0.096	0.00040869	6
SLC19A2	5.99e-36	0.851852	0.518	0.071	1.87e-32	6
OTUD7A	1.2e-09	0.842393	0.431	0.08	3.74e-06	6
CD74	3.7e-16	0.841898	0.612	0.432	1.15e-12	6
PCNA	1.36e-63	0.835519	0.756	0.219	4.23e-60	6
COTL1	8.24e-06	0.814568	0.509	0.415	0.0257009	6
EIF5AL1	1.45e-08	0.808181	0.401	0.111	4.52e-05	6
MICAL1	1.05e-09	0.769206	0.29	0.143	3.27e-06	6
BEX3	1.26e-05	0.75709	0.293	0.1	0.0392014	6
LINC02352	2.23e-32	0.756858	0.504	0.15	6.95e-29	6
PFN1	1.34e-32	0.73882	0.764	0.473	4.18e-29	6
HLA-DRB1	8.44e-13	0.718776	0.588	0.395	2.63e-09	6
TTC12	7.58e-08	0.709112	0.293	0.14	0.000236235	6
PTMA	9.85e-78	0.702571	0.883	0.418	3.07e-74	6
LDHA	1.57e-11	0.698014	0.602	0.353	4.91e-08	6
MT1F	1.09e-07	0.689638	0.257	0.141	0.000339543	6
C8orf58	1.96e-23	0.674003	0.515	0.145	6.12e-20	6
IL32	4.34e-13	0.661714	0.477	0.33	1.35e-09	6
AC092445.1	8.63e-06	0.651239	0.371	0.046	0.0269168	6
SMC3	1.24e-05	0.648334	0.509	0.291	0.03869	6
IPPK	7.99e-09	0.608665	0.255	0.177	2.49e-05	6
PPM1L	4.76e-15	0.606985	0.45	0.101	1.49e-11	6
MAGEF1	7.77e-09	0.606502	0.366	0.083	2.42e-05	6
GSTP1	2.21e-06	0.593134	0.602	0.44	0.00690308	6
RAD52	6.47e-07	0.593021	0.355	0.088	0.00201873	6
SNHG20	2.27e-22	0.582591	0.477	0.112	7.08e-19	6
RPLP0	6.93e-14	0.567914	0.629	0.452	2.16e-10	6
AC009113.1	1.14e-12	0.522123	0.461	0.134	3.55e-09	6
PPIB	9.79e-16	0.50786	0.591	0.413	3.05e-12	6
PRRT3	1.2e-07	0.499089	0.382	0.086	0.000375677	6
PKMYT1	5.57e-15	0.492173	0.26	0.091	1.74e-11	6
CLYBL	1.95e-17	0.48197	0.488	0.116	6.08e-14	6
C1QTNF6	5.16e-08	0.480778	0.404	0.128	0.000160948	6
ZNF776	4.35e-13	0.460326	0.434	0.126	1.35e-09	6
RPS18	1.03e-12	0.458543	0.612	0.469	3.21e-09	6
HNRNPA3	1.81e-15	0.421028	0.648	0.438	5.64e-12	6
ACTB	2.44e-25	0.390607	0.74	0.498	7.59e-22	6
RPS2	2.42e-08	0.382647	0.561	0.43	7.54e-05	6
RPP40	1.5e-33	0.381937	0.512	0.107	4.69e-30	6
TCEAL8	6.88e-06	0.355572	0.287	0.133	0.0214465	6
AC022182.2	2.89e-17	0.287925	0.42	0.063	9.02e-14	6
ARSK	2.95e-11	0.273898	0.293	0.155	9.21e-08	6
MRPS6	9.31e-07	0.271905	0.599	0.426	0.00290232	6
FDFT1	2.23e-14	-0.25006	0.276	0.254	6.96e-11	6
KDSR	2.59e-10	-0.265366	0.301	0.119	8.09e-07	6
STMN3	6.86e-12	-0.284602	0.36	0.067	2.14e-08	6
SDF2L1	7.62e-09	-0.327071	0.547	0.25	2.38e-05	6
GZMA	2.11e-06	-0.365625	0.621	0.527	0.00659281	6
MTLN	1.15e-05	-0.365753	0.279	0.181	0.0358085	6
TRAPPC6A	1.14e-05	-0.450734	0.295	0.182	0.0353893	6
MT2A	1.89e-10	-0.454036	0.285	0.191	5.9e-07	6
CLU	1.2e-07	-0.458148	0.344	0.352	0.000375292	6
KLC4	7.04e-15	-0.473914	0.428	0.156	2.19e-11	6
AGTRAP	6.32e-11	-0.52957	0.271	0.145	1.97e-07	6
NCAM1	1.08e-05	-0.594016	0.358	0.144	0.0336451	6
ZNF691	5.12e-28	-0.663304	0.509	0.114	1.6e-24	6
DYNLL1	2.37e-08	-0.688253	0.355	0.416	7.39e-05	6
ZNF761	2.99e-09	-0.702503	0.377	0.128	9.33e-06	6
PTPRC	5.9e-06	-0.709982	0.29	0.414	0.0183972	6
STK17B	4.12e-13	-0.720293	0.282	0.426	1.29e-09	6
ANXA1	6.57e-08	-0.731329	0.377	0.471	0.000204878	6
AC013264.1	1.61e-06	-0.733583	0.339	0.114	0.00503011	6
NCR1	9.33e-10	-0.761667	0.339	0.12	2.91e-06	6
RYR1	8.74e-07	-0.784118	0.271	0.124	0.00272613	6
HLA-DQB1	6.97e-14	-0.787506	0.29	0.246	2.17e-10	6
HLA-A	2.23e-10	-0.796239	0.298	0.441	6.94e-07	6
ARL4C	3.88e-08	-0.804012	0.339	0.461	0.000120951	6
MAGED2	1.05e-18	-0.814133	0.285	0.167	3.29e-15	6
FYB1	6.39e-07	-0.826204	0.355	0.419	0.00199167	6
ZMAT3	3.18e-13	-0.878527	0.255	0.108	9.9e-10	6
JUNB	1.57e-05	-0.890359	0.325	0.241	0.0488125	6
DDX5	2.62e-07	-0.891103	0.333	0.426	0.000818006	6
GOLGB1	1.11e-10	-0.897205	0.301	0.35	3.47e-07	6
PPP1R15A	2.57e-12	-0.909939	0.29	0.352	8e-09	6
APOBEC3H	1.44e-12	-0.925147	0.309	0.296	4.49e-09	6
FYN	1.87e-06	-0.927423	0.274	0.321	0.00584088	6
TMSB4X	9.95e-12	-0.936528	0.26	0.43	3.1e-08	6
ETS1	5.22e-09	-0.975282	0.282	0.421	1.63e-05	6
S100A11	1.21e-09	-0.978806	0.249	0.385	3.78e-06	6
MMP24OS	2.19e-10	-0.981237	0.244	0.259	6.84e-07	6
SELPLG	5.04e-11	-0.986112	0.274	0.328	1.57e-07	6
GLIPR1	1.06e-10	-0.995483	0.279	0.342	3.31e-07	6
LINC00271	1.82e-36	-0.999176	0.48	0.118	5.67e-33	6
SYF2	1.18e-05	-0.999476	0.304	0.352	0.0367243	6
CMTM3	1.08e-06	-1.00167	0.328	0.277	0.00337699	6
CYTIP	1.12e-09	-1.01018	0.295	0.302	3.49e-06	6
EZH2	1.56e-13	-1.03482	0.463	0.202	4.87e-10	6
PCED1B-AS1	3.19e-14	-1.05408	0.285	0.394	9.93e-11	6
MAP1LC3B	3.05e-10	-1.06787	0.274	0.385	9.52e-07	6
LITAF	3.89e-08	-1.08092	0.295	0.334	0.000121197	6
HLA-C	2.06e-23	-1.0844	0.247	0.466	6.43e-20	6
LPP	1.42e-14	-1.09046	0.35	0.115	4.43e-11	6
LETM2	5.82e-13	-1.09146	0.382	0.148	1.81e-09	6
DCTN3	1.35e-05	-1.11832	0.344	0.38	0.0419943	6
PIK3R5	5.25e-11	-1.13183	0.32	0.141	1.64e-07	6
MACF1	2.68e-06	-1.14767	0.331	0.295	0.00835146	6
TC2N	2.46e-12	-1.15075	0.309	0.392	7.67e-09	6
AHNAK	1.01e-05	-1.16728	0.282	0.407	0.0314352	6
S1PR4	2.35e-08	-1.17559	0.263	0.338	7.33e-05	6
UBB	1.49e-08	-1.18819	0.333	0.459	4.63e-05	6
MYO1F	9.51e-16	-1.19167	0.236	0.268	2.96e-12	6
TAGAP	8.85e-18	-1.21826	0.255	0.262	2.76e-14	6
EVI2B	1.47e-20	-1.22206	0.23	0.359	4.59e-17	6
ACP6	2.13e-12	-1.22993	0.304	0.124	6.65e-09	6
SLFN5	3.08e-23	-1.26954	0.19	0.315	9.61e-20	6
MYADM	2.91e-10	-1.30463	0.322	0.327	9.07e-07	6
RSRP1	1.69e-23	-1.36985	0.241	0.303	5.26e-20	6
ZFP36L2	2.7e-08	-1.38014	0.298	0.33	8.41e-05	6
PYM1	1.12e-07	-1.38622	0.268	0.159	0.000348435	6
EXD3	2.22e-06	-1.40163	0.287	0.138	0.00693277	6
HLA-E	6.68e-27	-1.44077	0.209	0.442	2.08e-23	6
PRF1	7.6e-06	-1.45223	0.363	0.491	0.0236901	6
CD2	3.8e-08	-1.45681	0.301	0.443	0.000118334	6
RPS27L	2.86e-06	-1.45766	0.298	0.428	0.00893066	6
DUSP6	3.41e-06	-1.51119	0.293	0.198	0.0106187	6
USP46	3.79e-09	-1.51534	0.355	0.103	1.18e-05	6
GAS5	5.28e-06	-1.52621	0.304	0.286	0.0164714	6
APBA3	1.75e-18	-1.56211	0.415	0.093	5.45e-15	6
AHCYL2	3.32e-13	-1.56951	0.331	0.129	1.04e-09	6
GATA3	6.05e-08	-1.62891	0.225	0.282	0.000188605	6
GCLC	1.98e-10	-1.68749	0.358	0.138	6.16e-07	6
CD8A	1.49e-05	-1.70376	0.455	0.569	0.0463584	6
SFXN3	2.03e-10	-1.7062	0.26	0.117	6.32e-07	6
PUM3	1.25e-11	-1.71571	0.377	0.146	3.9e-08	6
SDCBP	1.16e-25	-1.71943	0.146	0.301	3.62e-22	6
CENPM	1.55e-07	-1.72219	0.472	0.158	0.000483517	6
C11orf1	5.36e-08	-1.72308	0.355	0.114	0.000167112	6
SLC5A3	6.64e-07	-1.73664	0.285	0.244	0.00206953	6
GIMAP4	4.28e-11	-1.74047	0.241	0.261	1.33e-07	6
BTG1	4.58e-17	-1.76538	0.203	0.377	1.43e-13	6
GNPTAB	9.02e-10	-1.78489	0.233	0.256	2.81e-06	6
H2AFZ	8.6e-28	-1.7918	0.745	0.399	2.68e-24	6
BCL9L	2.3e-15	-1.81035	0.276	0.107	7.18e-12	6
PPP2R5B	1.97e-17	-1.81774	0.379	0.097	6.16e-14	6
KIF11	1.37e-12	-1.82064	0.396	0.205	4.28e-09	6
PDCD4	1.68e-22	-1.83288	0.201	0.307	5.23e-19	6
CST7	4.02e-08	-1.83955	0.36	0.468	0.000125419	6
IL16	1.24e-09	-1.84047	0.29	0.324	3.87e-06	6
CCL4	8.17e-07	-1.84308	0.309	0.393	0.00254608	6
SPIN2B	1.23e-28	-1.85834	0.404	0.113	3.83e-25	6
HP1BP3	2.57e-17	-1.87614	0.266	0.444	8.01e-14	6
ITGA1	1.7e-08	-1.88831	0.385	0.238	5.3e-05	6
ID2	7.82e-15	-1.88957	0.257	0.318	2.44e-11	6
PNRC1	1.7e-14	-1.89559	0.217	0.415	5.29e-11	6
BATF	8.61e-08	-1.91863	0.271	0.23	0.000268367	6
IRF1	3.09e-15	-1.94304	0.314	0.3	9.64e-12	6
UTRN	1.12e-35	-1.95055	0.19	0.265	3.5e-32	6
TXN	5.04e-14	-1.99301	0.58	0.404	1.57e-10	6
NUCB2	5.01e-06	-1.99863	0.344	0.274	0.0156325	6
UBXN8	2.27e-10	-2.02906	0.39	0.165	7.09e-07	6
TSC22D3	6.39e-19	-2.04294	0.247	0.415	1.99e-15	6
RNF146	1.33e-10	-2.07077	0.306	0.159	4.16e-07	6
EIF2B2	1.24e-14	-2.11788	0.39	0.148	3.88e-11	6
ROR2	1.49e-05	-2.18363	0.388	0.157	0.0464231	6
ZFAS1	1.46e-05	-2.21918	0.371	0.347	0.0454009	6
AHI1	4.1e-10	-2.26726	0.279	0.271	1.28e-06	6
KBTBD3	1.27e-15	-2.31386	0.29	0.115	3.97e-12	6
ATP10D	1.17e-07	-2.3162	0.309	0.219	0.000365668	6
TUBA1A	1.79e-13	-2.31773	0.274	0.378	5.58e-10	6
SMC4	1.62e-10	-2.32682	0.322	0.341	5.05e-07	6
JPT1	6.14e-18	-2.32877	0.268	0.362	1.92e-14	6
KLF6	1.35e-16	-2.35222	0.274	0.438	4.22e-13	6
CALM2	8.78e-06	-2.35255	0.322	0.45	0.0273784	6
NCK1-DT	5.12e-13	-2.3792	0.352	0.118	1.6e-09	6
CEBPD	5.25e-07	-2.45217	0.192	0.265	0.00163588	6
MALAT1	9.34e-37	-2.5238	0.108	0.405	2.91e-33	6
SYTL3	3.91e-14	-2.53725	0.263	0.287	1.22e-10	6
PRKCQ-AS1	1.13e-21	-2.60399	0.252	0.254	3.53e-18	6
NBPF3	7e-18	-2.6221	0.363	0.129	2.18e-14	6
LPAR6	1.18e-06	-2.66695	0.295	0.356	0.00369275	6
TMEM120B	1.94e-13	-2.70377	0.355	0.133	6.06e-10	6
FTL	4.56e-15	-2.73915	0.499	0.338	1.42e-11	6
SLC3A2	1.14e-14	-2.77476	0.263	0.211	3.54e-11	6
ZNF621	1.71e-10	-2.81419	0.398	0.16	5.34e-07	6
ZNF561	5.57e-22	-2.82611	0.398	0.1	1.74e-18	6
MAML1	3.53e-07	-2.89496	0.295	0.132	0.00110129	6
NSMF	4.91e-07	-2.92712	0.325	0.133	0.00153099	6
AC007114.1	1.32e-13	-2.9339	0.347	0.127	4.11e-10	6
TIGIT	2.1e-13	-2.94634	0.276	0.313	6.56e-10	6
H1FX	3.15e-12	-2.96959	0.328	0.439	9.83e-09	6
SFMBT2	1.28e-05	-3.0055	0.306	0.133	0.0398374	6
CYB5D2	1.66e-07	-3.02651	0.29	0.125	0.000517927	6
TCTA	5.76e-10	-3.18111	0.306	0.162	1.8e-06	6
NDUFAF1	1.91e-12	-3.20578	0.317	0.098	5.95e-09	6
ZNF821	8.91e-14	-3.25228	0.339	0.138	2.78e-10	6
FASLG	1.89e-08	-3.2594	0.328	0.127	5.88e-05	6
UBC	7.12e-17	-3.30166	0.228	0.43	2.22e-13	6
SCML4	5.29e-12	-3.31071	0.36	0.155	1.65e-08	6
CKS1B	2.93e-14	-3.34608	0.312	0.249	9.15e-11	6
JAML	3.01e-10	-3.43016	0.268	0.332	9.4e-07	6
SH2D2A	1.02e-06	-3.50817	0.23	0.303	0.00317283	6
DDX43	5.92e-18	-3.65776	0.382	0.15	1.85e-14	6
DTWD1	4.14e-11	-3.66807	0.328	0.116	1.29e-07	6
TP53I3	9.58e-32	-3.70393	0.447	0.11	2.99e-28	6
H2AFX	3.59e-21	-3.84652	0.26	0.25	1.12e-17	6
TNFAIP3	2.74e-18	-3.95294	0.257	0.351	8.55e-15	6
CKAP2	5.97e-15	-4.00883	0.184	0.263	1.86e-11	6
DUSP1	3.15e-09	-4.04118	0.32	0.379	9.81e-06	6
KIF20B	8.79e-25	-4.04544	0.241	0.258	2.74e-21	6
UBALD2	1.33e-17	-4.04873	0.271	0.362	4.14e-14	6
PTTG1	6.11e-07	-4.10574	0.341	0.373	0.00190617	6
RCBTB2	1.88e-09	-4.29846	0.157	0.255	5.87e-06	6
CCL5	2.7e-11	-4.38978	0.371	0.505	8.42e-08	6
HIST1H1D	1.57e-05	-4.61634	0.263	0.335	0.0489865	6
TUBB	6.55e-06	-4.65827	0.453	0.32	0.0204238	6
TPX2	1.03e-19	-4.69263	0.198	0.261	3.22e-16	6
RGS1	8.73e-13	-4.70914	0.203	0.261	2.72e-09	6
UBE2S	4.64e-06	-5.21233	0.322	0.309	0.0144701	6
TUBA1B	5.53e-18	-5.23371	0.569	0.318	1.72e-14	6
ARL6IP1	2.11e-42	-5.47474	0.095	0.388	6.58e-39	6
TUBB4B	8.79e-09	-5.65462	0.287	0.325	2.74e-05	6
HIST2H2AC	5.63e-14	-5.67392	0.274	0.316	1.76e-10	6
CKS2	7.79e-52	-5.87263	0.195	0.292	2.43e-48	6
TUBA1C	1.07e-15	-6.72724	0.206	0.276	3.35e-12	6
[truncated: 1,419 more rows]
